# Supplementary material for: A Practical Framework for Novel Electronic Nicotine Delivery System Evaluation: Chemical and Toxicological Characterization of JUUL2 Aerosol and Comparison with Reference Cigarettes
Source: MDPI journal article supplement (doi:10.3390/toxics12010041), 2024-01-04
Supplement: s1 [file s1]

## *Supplementary Materials File S2*

### 1 Per Collection Limits Summary

#### 1.1 Virginia Tobacco 18 mg/mL Non-Intense Per Collection Limit of Detection and Quantification Values

| Parameter/<br>Constituent              | Units          | T0         |            | T3         |            | T6         |            | T9         |            | T12        |            |
|----------------------------------------|----------------|------------|------------|------------|------------|------------|------------|------------|------------|------------|------------|
| pH                                     | NA             | NA         | NA         | NA         | NA         | NA         | NA         | NA         | NA         | NA         | NA         |
| <b>Primary Constituents</b>            |                | <b>LOD</b> | <b>LOQ</b> |
| Nicotine                               | mg/collection  | 0.20       | 2.02       | 0.20       | 1.99       | 0.20       | 2.03       | 0.20       | 2.02       | 0.20       | 2.09       |
| Glycerol                               | mg/collection  | 0.50       | 12.58      | 0.50       | 5.02       | 0.50       | 5.03       | 0.50       | 5.04       | 0.50       | 5.04       |
| Propylene Glycol                       | mg/collection  | 0.21       | 2.06       | 0.21       | 2.06       | 0.21       | 2.08       | 0.21       | 2.01       | 0.21       | 2.14       |
| Water                                  | mg/collection  | 24.63      | 24.63      | 24.60      | 24.60      | 24.53      | 24.53      | 24.52      | 24.52      | 24.43      | 24.43      |
| Menthol                                | mg/collection  | 0.16       | 1.58       | 0.16       | 1.61       | 0.16       | 1.60       | 0.16       | 1.59       | 0.16       | 1.64       |
| Diethylene Glycol                      | mg/collection  | 0.17       | 1.76       | 0.16       | 1.65       | 0.16       | 1.67       | 0.16       | 1.67       | 0.17       | 1.66       |
| Ethylene Glycol                        | mg/collection  | 0.18       | 1.77       | 0.18       | 1.76       | 0.18       | 1.78       | 0.18       | 1.79       | 0.18       | 1.77       |
| <b>Carbonyls &amp; Glycidol</b>        |                | <b>LOD</b> | <b>LOQ</b> |
| Acetaldehyde                           | mcg/collection | 0.17       | 1.13       | 0.17       | 1.13       | 0.20       | 1.13       | 0.20       | 1.13       | 0.20       | 1.13       |
| Acrolein                               | mcg/collection | 0.11       | 1.13       | 0.11       | 1.13       | 0.15       | 1.13       | 0.15       | 1.13       | 0.15       | 1.13       |
| Diacetyl                               | mcg/collection | 0.12       | 1.14       | 0.12       | 1.15       | 0.11       | 1.15       | 0.11       | 1.12       | 0.11       | 1.12       |
| Formaldehyde                           | mcg/collection | 0.25       | 1.13       | 0.25       | 1.13       | 0.38       | 1.13       | 0.38       | 1.13       | 0.38       | 1.13       |
| Glycidol                               | mcg/collection | 0.003      | 0.03       | 0.003      | 0.03       | 0.003      | 0.03       | 0.003      | 0.03       | 0.003      | 0.03       |
| Acetyl Propionyl                       | mcg/collection | 0.11       | 1.12       | 0.11       | 1.13       | 0.11       | 1.13       | 0.11       | 1.14       | 0.11       | 1.14       |
| Butyraldehyde                          | mcg/collection | 0.12       | 1.13       | 0.12       | 1.13       | 0.11       | 1.13       | 0.11       | 1.13       | 0.11       | 1.13       |
| Crotonaldehyde                         | mcg/collection | 0.11       | 1.12       | 0.11       | 1.12       | 0.18       | 1.13       | 0.18       | 1.13       | 0.18       | 1.11       |
| Furfural                               | mcg/collection | 0.15       | 1.13       | 0.15       | 1.13       | 0.19       | 1.13       | 0.19       | 1.13       | 0.19       | 1.13       |
| <b>Nicotine Degradants &amp; TSNAs</b> |                | <b>LOD</b> | <b>LOQ</b> |
| β-Nicotyrine                           | mcg/collection | 0.09       | 0.90       | 0.09       | 0.90       | 0.09       | 0.90       | 0.09       | 0.90       | 0.09       | 0.90       |
| Cotinine                               | mcg/collection | 0.09       | 0.90       | 0.09       | 0.90       | 0.09       | 0.90       | 0.09       | 0.90       | 0.09       | 0.90       |

## Supplementary Material

|                         |                |            |            |            |            |            |            |            |            |            |            |
|-------------------------|----------------|------------|------------|------------|------------|------------|------------|------------|------------|------------|------------|
| <b>Myosmine</b>         | mcg/collection | 0.09       | 0.90       | 0.09       | 0.90       | 0.09       | 0.90       | 0.09       | 0.90       | 0.09       | 0.90       |
| <b>Nicotine N Oxide</b> | mcg/collection | 0.31       | 0.90       | 0.31       | 0.90       | 0.09       | 0.90       | 0.09       | 0.90       | 0.09       | 0.90       |
| <b>Nornicotine</b>      | mcg/collection | 0.14       | 0.90       | 0.14       | 0.90       | 0.09       | 0.90       | 0.09       | 0.90       | 0.09       | 0.90       |
| <b>Anabasine</b>        | mcg/collection | 0.09       | 0.89       | 0.09       | 0.91       | 0.09       | 0.91       | 0.09       | 0.91       | 0.09       | 0.91       |
| <b>Anatabine</b>        | mcg/collection | 0.09       | 0.90       | 0.09       | 0.90       | 0.09       | 0.90       | 0.09       | 0.90       | 0.09       | 0.90       |
| <b>NNK</b>              | mcg/collection | 0.003      | 0.03       | NT         |
| <b>NNN</b>              | mcg/collection | 0.003      | 0.03       | NT         |
| <b>Metals</b>           |                | <b>LOD</b> | <b>LOQ</b> |
| <b>Arsenic</b>          | ng/collection  | 10.00      | 50.00      | 10.00      | 50.00      | 10.00      | 50.00      | 10.00      | 50.00      | 10.00      | 50.00      |
| <b>Beryllium</b>        | ng/collection  | 2.20       | 20.00      | 2.20       | 20.00      | 2.20       | 20.00      | 2.20       | 20.00      | 2.20       | 20.00      |
| <b>Cadmium</b>          | ng/collection  | 1.00       | 5.00       | 1.00       | 5.00       | 1.00       | 5.00       | 1.00       | 5.00       | 1.00       | 5.00       |
| <b>Chromium</b>         | ng/collection  | 10.00      | 50.00      | 10.00      | 50.00      | 10.00      | 50.00      | 10.00      | 50.00      | 10.00      | 50.00      |
| <b>Cobalt</b>           | ng/collection  | 0.50       | 5.00       | 0.50       | 5.00       | 0.50       | 5.00       | 0.50       | 5.00       | 0.50       | 5.00       |
| <b>Copper</b>           | ng/collection  | 25.00      | 75.00      | 25.00      | 75.00      | 25.00      | 75.00      | 25.00      | 75.00      | 25.00      | 75.00      |
| <b>Gold</b>             | ng/collection  | 170.00     | 200.00     | NT         |
| <b>Iron</b>             | ng/collection  | 100.00     | 200.00     | 100.00     | 200.00     | 100.00     | 200.00     | 100.00     | 200.00     | 100.00     | 200.00     |
| <b>Lead</b>             | ng/collection  | 2.50       | 10.00      | 2.50       | 10.00      | 2.50       | 10.00      | 2.50       | 10.00      | 2.50       | 10.00      |
| <b>Nickel</b>           | ng/collection  | 5.00       | 10.00      | 5.00       | 10.00      | 5.00       | 10.00      | 5.00       | 10.00      | 5.00       | 10.00      |
| <b>Selenium</b>         | ng/collection  | 3.90       | 20.00      | 3.90       | 20.00      | 3.90       | 20.00      | 3.90       | 20.00      | 3.90       | 20.00      |
| <b>Silver</b>           | ng/collection  | 1.00       | 5.00       | 1.00       | 5.00       | 1.00       | 5.00       | 1.00       | 5.00       | 1.00       | 5.00       |
| <b>Tin</b>              | ng/collection  | 10.00      | 50.00      | 10.00      | 50.00      | 10.00      | 50.00      | 10.00      | 50.00      | 10.00      | 50.00      |
| <b>Zinc</b>             | ng/collection  | 150.00     | 350.00     | 150.00     | 350.00     | 150.00     | 350.00     | 150.00     | 350.00     | 150.00     | 350.00     |
| <b>Organic Acids</b>    |                | <b>LOD</b> | <b>LOQ</b> |
| <b>Benzoic Acid</b>     | mg/collection  | 0.09       | 0.88       | 0.09       | 0.88       | 0.06       | 0.35       | 0.15       | 0.88       | 0.09       | 0.88       |
| <b>Propionic Acid</b>   | mcg/collection | 3.53       | 35.31      | 3.53       | 35.31      | 61.89      | 352.71     | 3.53       | 35.31      | 3.53       | 35.31      |
| <b>VOCs</b>             |                | <b>LOD</b> | <b>LOQ</b> |
| <b>1,3-Butadiene</b>    | mcg/collection | 0.05       | 0.20       | NT         |
| <b>Acrylonitrile</b>    | mcg/collection | 0.04       | 0.21       | NT         |
| <b>Benzene</b>          | mcg/collection | 0.06       | 0.30       | NT         |

|                              |                |            |            |            |            |            |            |            |            |            |            |
|------------------------------|----------------|------------|------------|------------|------------|------------|------------|------------|------------|------------|------------|
| <b>Isoprene</b>              | mcg/collection | 0.08       | 0.25       | NT         |
| <b>Propylene Oxide</b>       | mcg/collection | 0.15       | 0.85       | NT         |
| <b>Toluene</b>               | mcg/collection | 0.09       | 0.35       | NT         |
| <b>Esters &amp; Alcohols</b> |                | <b>LOD</b> | <b>LOQ</b> |
| <b>1-Butanol</b>             | mcg/collection | 1.62       | 16.20      | NT         |
| <b>Benzyl Acetate</b>        | mcg/collection | 2.51       | 25.12      | NT         |
| <b>Ethyl Acetate</b>         | mcg/collection | 2.88       | 28.76      | NT         |
| <b>Ethyl Acetoacetate</b>    | mcg/collection | 2.05       | 20.54      | NT         |
| <b>Isoamyl Acetate</b>       | mcg/collection | 1.75       | 17.52      | NT         |
| <b>Isobutyl Acetate</b>      | mcg/collection | 1.74       | 17.36      | NT         |
| <b>Methyl Acetate</b>        | mcg/collection | 1.87       | 18.66      | NT         |

## 1.2 Virginia Tobacco 18 mg/mL Intense Per Collection Limit of Detection and Quantification Values

| <b>Parameter/<br/>Constituent</b> | <b>Units</b>   | <b>T0</b>  |            | <b>T3</b>  |            | <b>T6</b>  |            | <b>T9</b>  |            | <b>T12</b> |            |
|-----------------------------------|----------------|------------|------------|------------|------------|------------|------------|------------|------------|------------|------------|
| <b>pH</b>                         | NA             | NA         | NA         | NA         | NA         | NA         | NA         | NA         | NA         | NA         | NA         |
| <b>Primary Constituents</b>       |                | <b>LOD</b> | <b>LOQ</b> |
| <b>Nicotine</b>                   | mg/collection  | 0.20       | 2.02       | 0.20       | 1.99       | 0.20       | 2.03       | 0.20       | 2.02       | 0.20       | 2.09       |
| <b>Glycerol</b>                   | mg/collection  | 0.50       | 12.58      | 0.50       | 5.02       | 0.50       | 5.03       | 0.45       | 4.53       | 0.45       | 4.54       |
| <b>Propylene Glycol</b>           | mg/collection  | 0.21       | 2.06       | 0.21       | 2.06       | 0.21       | 2.08       | 0.21       | 2.01       | 0.21       | 2.14       |
| <b>Water</b>                      | mg/collection  | 24.62      | 24.68      | 24.66      | 24.66      | 24.46      | 24.46      | 24.48      | 24.48      | 24.45      | 24.45      |
| <b>Menthol</b>                    | mg/collection  | 0.16       | 1.58       | 0.16       | 1.61       | 0.16       | 1.60       | 0.16       | 1.59       | 0.16       | 1.64       |
| <b>Diethylene Glycol</b>          | mg/collection  | 0.17       | 1.76       | 0.16       | 1.65       | 0.16       | 1.67       | 0.16       | 1.67       | 0.17       | 1.66       |
| <b>Ethylene Glycol</b>            | mg/collection  | 0.18       | 1.77       | 0.18       | 1.76       | 0.18       | 1.78       | 0.18       | 1.79       | 0.18       | 1.77       |
| <b>Carbonyls &amp; Glycidol</b>   |                | <b>LOD</b> | <b>LOQ</b> |
| <b>Acetaldehyde</b>               | mcg/collection | 0.20       | 1.32       | 0.20       | 1.32       | 0.24       | 1.31       | 0.24       | 1.31       | 0.24       | 1.32       |
| <b>Acrolein</b>                   | mcg/collection | 0.13       | 1.32       | 0.13       | 1.32       | 0.18       | 1.32       | 0.18       | 1.32       | 0.18       | 1.31       |
| <b>Diacetyl</b>                   | mcg/collection | 0.14       | 1.33       | 0.14       | 1.34       | 0.13       | 1.34       | 0.13       | 1.30       | 0.13       | 1.30       |

## Supplementary Material

|                                         |                |            |            |            |            |            |            |            |            |            |            |
|-----------------------------------------|----------------|------------|------------|------------|------------|------------|------------|------------|------------|------------|------------|
| <b>Formaldehyde</b>                     | mcg/collection | 0.29       | 1.31       | 0.29       | 1.31       | 0.44       | 1.31       | 0.44       | 1.31       | 0.44       | 1.32       |
| <b>Glycidol</b>                         | mcg/collection | 0.003      | 0.03       | 0.003      | 0.03       | 0.003      | 0.03       | 0.003      | 0.03       | 0.003      | 0.03       |
| <b>Acetyl Propionyl</b>                 | mcg/collection | 0.13       | 1.31       | 0.13       | 1.32       | 0.13       | 1.32       | 0.13       | 1.33       | 0.13       | 1.33       |
| <b>Butyraldehyde</b>                    | mcg/collection | 0.14       | 1.32       | 0.14       | 1.32       | 0.13       | 1.32       | 0.13       | 1.30       | 0.13       | 1.30       |
| <b>Crotonaldehyde</b>                   | mcg/collection | 0.13       | 1.31       | 0.13       | 1.31       | 0.21       | 1.32       | 0.21       | 1.32       | 0.21       | 1.29       |
| <b>Furfural</b>                         | mcg/collection | 0.18       | 1.32       | 0.18       | 1.32       | 0.22       | 1.32       | 0.22       | 1.32       | 0.22       | 1.32       |
| <b>Nicotine Degradants &amp; TSNA's</b> |                | <b>LOD</b> | <b>LOQ</b> |
| <b>β-Nicotyrine</b>                     | mcg/collection | 0.10       | 1.05       | 0.10       | 1.05       | 0.11       | 1.06       | 0.11       | 1.06       | 0.11       | 1.06       |
| <b>Cotinine</b>                         | mcg/collection | 0.10       | 1.05       | 0.10       | 1.05       | 0.11       | 1.06       | 0.11       | 1.06       | 0.11       | 1.06       |
| <b>Myosmine</b>                         | mcg/collection | 0.10       | 1.05       | 0.10       | 1.05       | 0.11       | 1.05       | 0.11       | 1.05       | 0.11       | 1.05       |
| <b>Nicotine N Oxide</b>                 | mcg/collection | 0.37       | 1.06       | 0.37       | 1.05       | 0.11       | 1.05       | 0.11       | 1.05       | 0.11       | 1.05       |
| <b>Nornicotine</b>                      | mcg/collection | 0.17       | 1.05       | 0.17       | 1.05       | 0.11       | 1.05       | 0.11       | 1.05       | 0.11       | 1.05       |
| <b>Anabasine</b>                        | mcg/collection | 0.11       | 1.04       | 0.11       | 1.05       | 0.11       | 1.06       | 0.11       | 1.06       | 0.11       | 1.06       |
| <b>Anatabine</b>                        | mcg/collection | 0.11       | 1.06       | 0.11       | 1.06       | 0.11       | 1.06       | 0.11       | 1.06       | 0.11       | 1.06       |
| <b>NNK</b>                              | mcg/collection | 0.002      | 0.03       | NT         |
| <b>NNN</b>                              | mcg/collection | 0.003      | 0.03       | NT         |
| <b>Metals</b>                           |                | <b>LOD</b> | <b>LOQ</b> |
| <b>Arsenic</b>                          | ng/collection  | 10.00      | 50.00      | 10.00      | 50.00      | 10.00      | 50.00      | 10.00      | 50.00      | 10.00      | 50.00      |
| <b>Beryllium</b>                        | ng/collection  | 2.20       | 20.00      | 2.20       | 20.00      | 2.20       | 20.00      | 2.20       | 20.00      | 2.20       | 20.00      |
| <b>Cadmium</b>                          | ng/collection  | 1.00       | 5.00       | 1.00       | 5.00       | 1.00       | 5.00       | 1.00       | 5.00       | 1.00       | 5.00       |
| <b>Chromium</b>                         | ng/collection  | 10.00      | 50.00      | 10.00      | 50.00      | 10.00      | 50.00      | 10.00      | 50.00      | 10.00      | 50.00      |
| <b>Cobalt</b>                           | ng/collection  | 0.50       | 5.00       | 0.50       | 5.00       | 0.50       | 5.00       | 0.50       | 5.00       | 0.50       | 5.00       |
| <b>Copper</b>                           | ng/collection  | 25.00      | 75.00      | 25.00      | 75.00      | 25.00      | 75.00      | 25.00      | 75.00      | 25.00      | 75.00      |
| <b>Gold</b>                             | ng/collection  | 170.00     | 200.00     | NT         |
| <b>Iron</b>                             | ng/collection  | 100.00     | 200.00     | 100.00     | 200.00     | 100.00     | 200.00     | 100.00     | 200.00     | 100.00     | 200.00     |
| <b>Lead</b>                             | ng/collection  | 2.50       | 10.00      | 2.50       | 10.00      | 2.50       | 10.00      | 2.50       | 10.00      | 2.50       | 10.00      |
| <b>Nickel</b>                           | ng/collection  | 5.00       | 10.00      | 5.00       | 10.00      | 5.00       | 10.00      | 5.00       | 10.00      | 5.00       | 10.00      |
| <b>Selenium</b>                         | ng/collection  | 3.90       | 20.00      | 3.90       | 20.00      | 3.90       | 20.00      | 3.90       | 20.00      | 3.90       | 20.00      |
| <b>Silver</b>                           | ng/collection  | 1.00       | 5.00       | 1.00       | 5.00       | 1.00       | 5.00       | 1.00       | 5.00       | 1.00       | 5.00       |

|                              |                |            |            |            |            |            |            |            |            |            |            |
|------------------------------|----------------|------------|------------|------------|------------|------------|------------|------------|------------|------------|------------|
| <b>Tin</b>                   | ng/collection  | 10.00      | 50.00      | 10.00      | 50.00      | 10.00      | 50.00      | 10.00      | 50.00      | 10.00      | 50.00      |
| <b>Zinc</b>                  | ng/collection  | 150.00     | 350.00     | 150.00     | 350.00     | 150.00     | 350.00     | 150.00     | 350.00     | 150.00     | 350.00     |
| <b>Organic Acids</b>         |                | <b>LOD</b> | <b>LOQ</b> |
| <b>Benzoic Acid</b>          | mg/collection  | 0.09       | 0.88       | 0.09       | 0.88       | 0.07       | 0.67       | 0.16       | 0.88       | 0.16       | 0.88       |
| <b>Propionic Acid</b>        | mcg/collection | 3.53       | 35.31      | 3.53       | 35.31      | 87.72      | 670.15     | 3.53       | 35.31      | 3.53       | 35.31      |
| <b>VOCs</b>                  |                | <b>LOD</b> | <b>LOQ</b> |
| <b>1,3-Butadiene</b>         | mcg/collection | 0.05       | 0.20       | NT         |
| <b>Acrylonitrile</b>         | mcg/collection | 0.04       | 0.21       | NT         |
| <b>Benzene</b>               | mcg/collection | 0.06       | 0.30       | NT         |
| <b>Isoprene</b>              | mcg/collection | 0.08       | 0.25       | NT         |
| <b>Propylene Oxide</b>       | mcg/collection | 0.15       | 0.85       | NT         |
| <b>Toluene</b>               | mcg/collection | 0.09       | 0.35       | NT         |
| <b>Esters &amp; Alcohols</b> |                | <b>LOD</b> | <b>LOQ</b> |
| <b>1-Butanol</b>             | mcg/collection | 1.62       | 16.20      | NT         |
| <b>Benzyl Acetate</b>        | mcg/collection | 2.51       | 25.12      | NT         |
| <b>Ethyl Acetate</b>         | mcg/collection | 2.88       | 28.76      | NT         |
| <b>Ethyl Acetoacetate</b>    | mcg/collection | 2.05       | 20.54      | NT         |
| <b>Isoamyl Acetate</b>       | mcg/collection | 1.75       | 17.52      | NT         |
| <b>Isobutyl Acetate</b>      | mcg/collection | 1.74       | 17.36      | NT         |
| <b>Methyl Acetate</b>        | mcg/collection | 1.87       | 18.66      | NT         |

### 1.3 Crisp Menthol 18 mg/mL Non-Intense Per Collection Limit of Detection and Quantification Values

| Parameter/<br>Constituent   | Units         | T0         |            | T3         |            | T6         |            | T9         |            | T12        |            |
|-----------------------------|---------------|------------|------------|------------|------------|------------|------------|------------|------------|------------|------------|
| <b>pH</b>                   | NA            | NA         | NA         | NA         | NA         | NA         | NA         | NA         | NA         | NA         | NA         |
| <b>Primary Constituents</b> |               | <b>LOD</b> | <b>LOQ</b> |
| <b>Nicotine</b>             | mg/collection | 0.20       | 2.02       | 0.20       | 1.99       | 0.20       | 2.03       | 0.20       | 2.02       | 0.20       | 2.09       |
| <b>Glycerol</b>             | mg/collection | 0.25       | 6.29       | 0.25       | 2.51       | 0.25       | 2.52       | 0.25       | 2.52       | 0.25       | 2.52       |

## Supplementary Material

|                                        |                |            |            |            |            |            |            |            |            |            |            |
|----------------------------------------|----------------|------------|------------|------------|------------|------------|------------|------------|------------|------------|------------|
| <b>Propylene Glycol</b>                | mg/collection  | 0.42       | 4.12       | 0.41       | 4.11       | 0.41       | 4.16       | 0.41       | 4.02       | 0.41       | 4.28       |
| <b>Water</b>                           | mg/collection  | 24.79      | 24.85      | 24.60      | 24.60      | 24.52      | 24.52      | 24.64      | 24.64      | 24.57      | 24.57      |
| <b>Menthol</b>                         | mg/collection  | 0.16       | 1.58       | 0.16       | 1.61       | 0.16       | 1.60       | 0.16       | 1.59       | 0.16       | 1.64       |
| <b>Diethylene Glycol</b>               | mg/collection  | 0.17       | 1.76       | 0.16       | 1.65       | 0.16       | 1.67       | 0.16       | 1.67       | 0.17       | 1.66       |
| <b>Ethylene Glycol</b>                 | mg/collection  | 0.18       | 1.77       | 0.18       | 1.76       | 0.18       | 1.78       | 0.18       | 1.79       | 0.18       | 1.77       |
| <b>Carbonyls &amp; Glycidol</b>        |                | <b>LOD</b> | <b>LOQ</b> |
| <b>Acetaldehyde</b>                    | mcg/collection | 0.17       | 1.13       | 0.17       | 1.13       | 0.20       | 1.13       | 0.20       | 1.13       | 0.20       | 1.13       |
| <b>Acrolein</b>                        | mcg/collection | 0.11       | 1.13       | 0.11       | 1.13       | 0.15       | 1.13       | 0.15       | 1.13       | 0.15       | 1.13       |
| <b>Diacetyl</b>                        | mcg/collection | 0.12       | 1.14       | 0.12       | 1.15       | 0.11       | 1.15       | 0.11       | 1.12       | 0.11       | 1.12       |
| <b>Formaldehyde</b>                    | mcg/collection | 0.25       | 1.13       | 0.25       | 1.13       | 0.38       | 1.13       | 0.38       | 1.13       | 0.38       | 1.13       |
| <b>Glycidol</b>                        | mcg/collection | 0.003      | 0.03       | 0.003      | 0.03       | 0.003      | 0.03       | 0.003      | 0.03       | 0.003      | 0.03       |
| <b>Acetyl Propionyl</b>                | mcg/collection | 0.11       | 1.12       | 0.11       | 1.13       | 0.11       | 1.13       | 0.11       | 1.14       | 0.11       | 1.14       |
| <b>Butyraldehyde</b>                   | mcg/collection | 0.12       | 1.13       | 0.12       | 1.13       | 0.11       | 1.13       | 0.11       | 1.13       | 0.11       | 1.13       |
| <b>Crotonaldehyde</b>                  | mcg/collection | 0.11       | 1.12       | 0.11       | 1.12       | 0.18       | 1.13       | 0.18       | 1.13       | 0.18       | 1.11       |
| <b>Furfural</b>                        | mcg/collection | 0.15       | 1.13       | 0.15       | 1.13       | 0.19       | 1.13       | 0.19       | 1.13       | 0.19       | 1.13       |
| <b>Nicotine Degradants &amp; TSNAs</b> |                | <b>LOD</b> | <b>LOQ</b> |
| <b>β-Nicotyrine</b>                    | mcg/collection | 0.09       | 0.90       | 0.09       | 0.90       | 0.09       | 0.90       | 0.09       | 0.90       | 0.09       | 0.90       |
| <b>Cotinine</b>                        | mcg/collection | 0.09       | 0.90       | 0.09       | 0.90       | 0.09       | 0.90       | 0.09       | 0.90       | 0.09       | 0.90       |
| <b>Myosmine</b>                        | mcg/collection | 0.09       | 0.90       | 0.09       | 0.90       | 0.09       | 0.90       | 0.09       | 0.90       | 0.09       | 0.90       |
| <b>Nicotine N Oxide</b>                | mcg/collection | 0.31       | 0.90       | 0.31       | 0.90       | 0.09       | 0.90       | 0.09       | 0.90       | 0.09       | 0.90       |
| <b>Nornicotine</b>                     | mcg/collection | 0.14       | 0.90       | 0.14       | 0.90       | 0.09       | 0.90       | 0.09       | 0.90       | 0.09       | 0.90       |
| <b>Anabasine</b>                       | mcg/collection | 0.09       | 0.89       | 0.09       | 0.91       | 0.09       | 0.91       | 0.09       | 0.91       | 0.09       | 0.91       |
| <b>Anatabine</b>                       | mcg/collection | 0.09       | 0.90       | 0.09       | 0.90       | 0.09       | 0.90       | 0.09       | 0.90       | 0.09       | 0.90       |
| <b>NNK</b>                             | mcg/collection | 0.003      | 0.03       | NT         |
| <b>NNN</b>                             | mcg/collection | 0.003      | 0.03       | NT         |
| <b>Metals</b>                          |                | <b>LOD</b> | <b>LOQ</b> |
| <b>Arsenic</b>                         | ng/collection  | 10.00      | 50.00      | 10.00      | 50.00      | 10.00      | 50.00      | 10.00      | 50.00      | 10.00      | 50.00      |
| <b>Beryllium</b>                       | ng/collection  | 2.20       | 20.00      | 2.20       | 20.00      | 2.20       | 20.00      | 2.20       | 20.00      | 2.20       | 20.00      |
| <b>Cadmium</b>                         | ng/collection  | 1.00       | 5.00       | 1.00       | 5.00       | 1.00       | 5.00       | 1.00       | 5.00       | 1.00       | 5.00       |

|                              |                |            |            |            |            |            |            |            |            |            |            |
|------------------------------|----------------|------------|------------|------------|------------|------------|------------|------------|------------|------------|------------|
| <b>Chromium</b>              | ng/collection  | 10.00      | 50.00      | 10.00      | 50.00      | 10.00      | 50.00      | 10.00      | 50.00      | 10.00      | 50.00      |
| <b>Cobalt</b>                | ng/collection  | 0.50       | 5.00       | 0.50       | 5.00       | 0.50       | 5.00       | 0.50       | 5.00       | 0.50       | 5.00       |
| <b>Copper</b>                | ng/collection  | 25.00      | 75.00      | 25.00      | 75.00      | 25.00      | 75.00      | 25.00      | 75.00      | 25.00      | 75.00      |
| <b>Gold</b>                  | ng/collection  | 170.00     | 200.00     | NT         |
| <b>Iron</b>                  | ng/collection  | 100.00     | 200.00     | 100.00     | 200.00     | 100.00     | 200.00     | 100.00     | 200.00     | 100.00     | 200.00     |
| <b>Lead</b>                  | ng/collection  | 2.50       | 10.00      | 2.50       | 10.00      | 2.50       | 10.00      | 2.50       | 10.00      | 2.50       | 10.00      |
| <b>Nickel</b>                | ng/collection  | 5.00       | 10.00      | 5.00       | 10.00      | 5.00       | 10.00      | 5.00       | 10.00      | 5.00       | 10.00      |
| <b>Selenium</b>              | ng/collection  | 3.90       | 20.00      | 3.90       | 20.00      | 3.90       | 20.00      | 3.90       | 20.00      | 3.90       | 20.00      |
| <b>Silver</b>                | ng/collection  | 1.00       | 5.00       | 1.00       | 5.00       | 1.00       | 5.00       | 1.00       | 5.00       | 1.00       | 5.00       |
| <b>Tin</b>                   | ng/collection  | 10.00      | 50.00      | 10.00      | 50.00      | 10.00      | 50.00      | 10.00      | 50.00      | 10.00      | 50.00      |
| <b>Zinc</b>                  | ng/collection  | 150.00     | 350.00     | 150.00     | 350.00     | 150.00     | 350.00     | 150.00     | 350.00     | 150.00     | 350.00     |
| <b>Organic Acids</b>         |                | <b>LOD</b> | <b>LOQ</b> |
| <b>Benzoic Acid</b>          | mg/collection  | 0.09       | 0.88       | 0.09       | 0.88       | 0.06       | 0.35       | 0.09       | 0.88       | 0.16       | 0.88       |
| <b>Propionic Acid</b>        | mcg/collection | 6.19       | 35.48      | 6.19       | 35.27      | 35.27      | 352.71     | 3.53       | 35.31      | 3.53       | 35.31      |
| <b>VOCs</b>                  |                | <b>LOD</b> | <b>LOQ</b> |
| <b>1,3-Butadiene</b>         | mcg/collection | 0.05       | 0.20       | NT         |
| <b>Acrylonitrile</b>         | mcg/collection | 0.04       | 0.21       | NT         |
| <b>Benzene</b>               | mcg/collection | 0.06       | 0.30       | NT         |
| <b>Isoprene</b>              | mcg/collection | 0.08       | 0.25       | NT         |
| <b>Propylene Oxide</b>       | mcg/collection | 0.15       | 0.85       | NT         |
| <b>Toluene</b>               | mcg/collection | 0.09       | 0.35       | NT         |
| <b>Esters &amp; Alcohols</b> |                | <b>LOD</b> | <b>LOQ</b> |
| <b>1-Butanol</b>             | mcg/collection | 1.62       | 16.20      | NT         |
| <b>Benzyl Acetate</b>        | mcg/collection | 2.51       | 25.12      | NT         |
| <b>Ethyl Acetate</b>         | mcg/collection | 2.88       | 28.76      | NT         |
| <b>Ethyl Acetoacetate</b>    | mcg/collection | 2.05       | 20.54      | NT         |
| <b>Isoamyl Acetate</b>       | mcg/collection | 1.75       | 17.52      | NT         |
| <b>Isobutyl Acetate</b>      | mcg/collection | 1.74       | 17.36      | NT         |
| <b>Methyl Acetate</b>        | mcg/collection | 1.87       | 18.66      | NT         |

#### 1.4 Crisp Menthol 18 mg/mL Intense Per Collection Limit of Detection and Quantification Values

| Parameter/<br>Constituent   | Units          | T0    |       | T3    |       | T6    |       | T9    |       | T12   |       |
|-----------------------------|----------------|-------|-------|-------|-------|-------|-------|-------|-------|-------|-------|
| pH                          | NA             | NA    | NA    | NA    | NA    | NA    | NA    | NA    | NA    | NA    | NA    |
| Primary Constituents        |                | LOD   | LOQ   |
| Nicotine                    | mg/collection  | 0.20  | 2.02  | 0.20  | 1.99  | 0.20  | 2.02  | 0.20  | 2.02  | 0.20  | 2.09  |
| Glycerol                    | mg/collection  | 0.25  | 6.29  | 0.25  | 2.51  | 0.25  | 2.52  | 0.25  | 2.52  | 0.25  | 2.52  |
| Propylene Glycol            | mg/collection  | 0.42  | 4.12  | 0.41  | 4.11  | 0.41  | 4.02  | 0.41  | 4.02  | 0.41  | 4.28  |
| Water                       | mg/collection  | 24.63 | 24.63 | 24.73 | 24.73 | 24.64 | 24.64 | 24.58 | 24.58 | 24.09 | 24.09 |
| Menthol                     | mg/collection  | 0.16  | 1.58  | 0.16  | 1.61  | 0.16  | 1.59  | 0.16  | 1.59  | 0.16  | 1.64  |
| Diethylene Glycol           | mg/collection  | 0.17  | 1.76  | 0.16  | 1.65  | 0.16  | 1.67  | 0.16  | 1.67  | 0.17  | 1.66  |
| Ethylene Glycol             | mg/collection  | 0.18  | 1.77  | 0.18  | 1.76  | 0.18  | 1.79  | 0.18  | 1.79  | 0.18  | 1.77  |
| Carbonyls & Glycidol        |                | LOD   | LOQ   |
| Acetaldehyde                | mcg/collection | 0.20  | 1.32  | 0.20  | 1.32  | 0.20  | 1.13  | 0.24  | 1.31  | 0.25  | 1.32  |
| Acrolein                    | mcg/collection | 0.13  | 1.32  | 0.13  | 1.32  | 0.15  | 1.13  | 0.18  | 1.32  | 0.38  | 1.31  |
| Diacetyl                    | mcg/collection | 0.14  | 1.33  | 0.14  | 1.34  | 0.11  | 1.12  | 0.13  | 1.30  | 0.26  | 1.30  |
| Formaldehyde                | mcg/collection | 0.29  | 1.31  | 0.29  | 1.31  | 0.38  | 1.13  | 0.44  | 1.31  | 0.76  | 1.32  |
| Glycidol                    | mcg/collection | 0.003 | 0.03  | 0.003 | 0.03  | 0.003 | 0.03  | 0.003 | 0.03  | 0.003 | 0.03  |
| Acetyl Propionyl            | mcg/collection | 0.13  | 1.31  | 0.13  | 1.32  | 0.11  | 1.14  | 0.13  | 1.33  | 0.18  | 1.33  |
| Butyraldehyde               | mcg/collection | 0.14  | 1.32  | 0.14  | 1.32  | 0.11  | 1.13  | 0.13  | 1.30  | 0.31  | 1.32  |
| Crotonaldehyde              | mcg/collection | 0.13  | 1.31  | 0.13  | 1.31  | 0.18  | 1.13  | 0.21  | 1.32  | 0.37  | 1.29  |
| Furfural                    | mcg/collection | 0.18  | 1.32  | 0.18  | 1.32  | 0.19  | 1.13  | 0.22  | 1.32  | 0.30  | 1.32  |
| Nicotine Degradants & TSNAs |                | LOD   | LOQ   |
| β-Nicotyrine                | mcg/collection | 0.10  | 1.05  | 0.10  | 1.05  | 0.09  | 0.90  | 0.11  | 1.06  | 0.11  | 1.06  |
| Cotinine                    | mcg/collection | 0.10  | 1.05  | 0.10  | 1.05  | 0.09  | 0.90  | 0.11  | 1.06  | 0.11  | 1.06  |
| Myosmine                    | mcg/collection | 0.10  | 1.05  | 0.10  | 1.05  | 0.09  | 0.90  | 0.11  | 1.05  | 0.11  | 1.05  |
| Nicotine N Oxide            | mcg/collection | 0.37  | 1.06  | 0.37  | 1.06  | 0.09  | 0.90  | 0.11  | 1.05  | 0.11  | 1.05  |



|                        |                |            |            |            |            |            |            |            |            |            |            |
|------------------------|----------------|------------|------------|------------|------------|------------|------------|------------|------------|------------|------------|
| <b>Nornicotine</b>     | mcg/collection | 0.17       | 1.05       | 0.17       | 1.05       | 0.09       | 0.90       | 0.11       | 1.05       | 0.11       | 1.05       |
| <b>Anabasine</b>       | mcg/collection | 0.11       | 1.04       | 0.11       | 1.04       | 0.09       | 0.91       | 0.11       | 1.06       | 0.11       | 1.06       |
| <b>Anatabine</b>       | mcg/collection | 0.11       | 1.06       | 0.11       | 1.06       | 0.09       | 0.90       | 0.11       | 1.06       | 0.11       | 1.06       |
| <b>NNK</b>             | mcg/collection | 0.00       | 0.03       | NT         |
| <b>NNN</b>             | mcg/collection | 0.00       | 0.03       | NT         |
| <b>Metals</b>          |                | <b>LOD</b> | <b>LOQ</b> |
| <b>Arsenic</b>         | ng/collection  | 10.00      | 50.00      | 10.00      | 50.00      | 10.00      | 50.00      | 10.00      | 50.00      | 10.00      | 50.00      |
| <b>Beryllium</b>       | ng/collection  | 2.20       | 20.00      | 2.20       | 20.00      | 2.20       | 20.00      | 2.20       | 20.00      | 2.20       | 20.00      |
| <b>Cadmium</b>         | ng/collection  | 1.00       | 5.00       | 1.00       | 5.00       | 1.00       | 5.00       | 1.00       | 5.00       | 1.00       | 5.00       |
| <b>Chromium</b>        | ng/collection  | 10.00      | 50.00      | 10.00      | 50.00      | 10.00      | 50.00      | 10.00      | 50.00      | 10.00      | 50.00      |
| <b>Cobalt</b>          | ng/collection  | 0.50       | 5.00       | 0.50       | 5.00       | 0.50       | 5.00       | 0.50       | 5.00       | 0.50       | 5.00       |
| <b>Copper</b>          | ng/collection  | 25.00      | 75.00      | 25.00      | 75.00      | 25.00      | 75.00      | 25.00      | 75.00      | 25.00      | 75.00      |
| <b>Gold</b>            | ng/collection  | 170.00     | 200.00     | NT         |
| <b>Iron</b>            | ng/collection  | 100.00     | 200.00     | 100.00     | 200.00     | 100.00     | 200.00     | 100.00     | 200.00     | 100.00     | 200.00     |
| <b>Lead</b>            | ng/collection  | 2.50       | 10.00      | 2.50       | 10.00      | 2.50       | 10.00      | 2.50       | 10.00      | 2.50       | 10.00      |
| <b>Nickel</b>          | ng/collection  | 5.00       | 10.00      | 5.00       | 10.00      | 5.00       | 10.00      | 5.00       | 10.00      | 5.00       | 10.00      |
| <b>Selenium</b>        | ng/collection  | 3.90       | 20.00      | 3.90       | 20.00      | 3.90       | 20.00      | 3.90       | 20.00      | 3.90       | 20.00      |
| <b>Silver</b>          | ng/collection  | 1.00       | 5.00       | 1.00       | 5.00       | 1.00       | 5.00       | 1.00       | 5.00       | 1.00       | 5.00       |
| <b>Tin</b>             | ng/collection  | 10.00      | 50.00      | 10.00      | 50.00      | 10.00      | 50.00      | 10.00      | 50.00      | 10.00      | 50.00      |
| <b>Zinc</b>            | ng/collection  | 150.00     | 350.00     | 150.00     | 350.00     | 150.00     | 350.00     | 150.00     | 350.00     | 150.00     | 350.00     |
| <b>Organic Acids</b>   |                | <b>LOD</b> | <b>LOQ</b> |
| <b>Benzoic Acid</b>    | mg/collection  | 0.09       | 0.88       | 0.09       | 0.88       | 0.09       | 0.88       | 0.09       | 0.88       | 0.09       | 0.88       |
| <b>Propionic Acid</b>  | mcg/collection | 6.19       | 35.48      | 4.62       | 35.27      | 3.53       | 35.31      | 3.53       | 35.31      | 3.53       | 35.31      |
| <b>VOCs</b>            |                | <b>LOD</b> | <b>LOQ</b> |
| <b>1,3-Butadiene</b>   | mcg/collection | 5.49E-02   | 2.00E-01   | NT         |
| <b>Acrylonitrile</b>   | mcg/collection | 3.60E-02   | 2.11E-01   | NT         |
| <b>Benzene</b>         | mcg/collection | 6.30E-02   | 3.00E-01   | NT         |
| <b>Isoprene</b>        | mcg/collection | 8.46E-02   | 2.53E-01   | NT         |
| <b>Propylene Oxide</b> | mcg/collection | 1.46E-01   | 8.52E-01   | NT         |

|                              |                |            |            |            |            |            |            |            |            |            |            |
|------------------------------|----------------|------------|------------|------------|------------|------------|------------|------------|------------|------------|------------|
| <b>Toluene</b>               | mcg/collection | 9.25E-02   | 3.52E-01   | NT         |
| <b>Esters &amp; Alcohols</b> |                | <b>LOD</b> | <b>LOQ</b> |
| <b>1-Butanol</b>             | mcg/collection | 1.62       | 16.20      | NT         |
| <b>Benzyl Acetate</b>        | mcg/collection | 2.51       | 25.12      | NT         |
| <b>Ethyl Acetate</b>         | mcg/collection | 2.88       | 28.76      | NT         |
| <b>Ethyl Acetoacetate</b>    | mcg/collection | 2.05       | 20.54      | NT         |
| <b>Isoamyl Acetate</b>       | mcg/collection | 1.75       | 17.52      | NT         |
| <b>Isobutyl Acetate</b>      | mcg/collection | 1.74       | 17.36      | NT         |
| <b>Methyl Acetate</b>        | mcg/collection | 1.87       | 18.66      | NT         |

### 1.5 Polar Menthol 18 mg/mL Non-Intense Per Collection Limit of Detection and Quantification Values

| Parameter/<br>Constituent       | Units          | T0         |            | T3         |            | T6         |            | T9         |            | T12        |            |
|---------------------------------|----------------|------------|------------|------------|------------|------------|------------|------------|------------|------------|------------|
| <b>pH</b>                       | NA             | NA         | NA         | NA         | NA         | NA         | NA         | NA         | NA         | NA         | NA         |
| <b>Primary Constituents</b>     |                | <b>LOD</b> | <b>LOQ</b> |
| <b>Nicotine</b>                 | mg/collection  | 0.20       | 2.02       | 0.20       | 1.99       | 0.20       | 2.03       | 0.20       | 2.02       | 0.20       | 2.09       |
| <b>Glycerol</b>                 | mg/collection  | 0.25       | 6.29       | 0.25       | 2.51       | 0.25       | 2.52       | 0.25       | 2.52       | 0.25       | 2.52       |
| <b>Propylene Glycol</b>         | mg/collection  | 0.42       | 4.12       | 0.41       | 4.11       | 0.41       | 4.16       | 0.41       | 4.02       | 0.37       | 3.85       |
| <b>Water</b>                    | mg/collection  | 24.64      | 24.64      | 24.60      | 24.60      | 24.50      | 24.50      | 24.62      | 24.62      | 24.53      | 24.53      |
| <b>Menthol</b>                  | mg/collection  | 0.16       | 1.58       | 0.16       | 1.61       | 0.16       | 1.60       | 0.16       | 1.59       | 0.16       | 1.64       |
| <b>Diethylene Glycol</b>        | mg/collection  | 0.17       | 1.76       | 0.16       | 1.65       | 0.16       | 1.67       | 0.16       | 1.67       | 0.17       | 1.66       |
| <b>Ethylene Glycol</b>          | mg/collection  | 0.18       | 1.77       | 0.18       | 1.76       | 0.18       | 1.78       | 0.18       | 1.79       | 0.18       | 1.77       |
| <b>Carbonyls &amp; Glycidol</b> |                | <b>LOD</b> | <b>LOQ</b> |
| <b>Acetaldehyde</b>             | mcg/collection | 0.17       | 1.13       | 0.17       | 1.13       | 0.20       | 1.13       | 0.20       | 1.13       | 0.20       | 1.13       |
| <b>Acrolein</b>                 | mcg/collection | 0.11       | 1.13       | 0.11       | 1.13       | 0.15       | 1.13       | 0.15       | 1.13       | 0.15       | 1.13       |
| <b>Diacetyl</b>                 | mcg/collection | 0.12       | 1.14       | 0.12       | 1.15       | 0.11       | 1.15       | 0.11       | 1.12       | 0.11       | 1.12       |
| <b>Formaldehyde</b>             | mcg/collection | 0.25       | 1.13       | 0.25       | 1.13       | 0.38       | 1.13       | 0.38       | 1.13       | 0.38       | 1.13       |
| <b>Glycidol</b>                 | mcg/collection | 0.003      | 0.03       | 0.003      | 0.03       | 0.003      | 0.03       | 0.003      | 0.03       | 0.003      | 0.03       |

|                                        |                |            |            |            |            |            |            |            |            |            |            |
|----------------------------------------|----------------|------------|------------|------------|------------|------------|------------|------------|------------|------------|------------|
| <b>Acetyl Propionyl</b>                | mcg/collection | 0.11       | 1.12       | 0.11       | 1.13       | 0.11       | 1.13       | 0.11       | 1.14       | 0.11       | 1.14       |
| <b>Butyraldehyde</b>                   | mcg/collection | 0.12       | 1.13       | 0.12       | 1.13       | 0.11       | 1.13       | 0.11       | 1.13       | 0.11       | 1.13       |
| <b>Crotonaldehyde</b>                  | mcg/collection | 0.11       | 1.12       | 0.11       | 1.12       | 0.18       | 1.13       | 0.18       | 1.13       | 0.18       | 1.11       |
| <b>Furfural</b>                        | mcg/collection | 0.15       | 1.13       | 0.15       | 1.13       | 0.19       | 1.13       | 0.19       | 1.13       | 0.19       | 1.13       |
| <b>Nicotine Degradants &amp; TSNAs</b> |                | <b>LOD</b> | <b>LOQ</b> |
| <b>β-Nicotyrine</b>                    | mcg/collection | 0.09       | 0.90       | 0.09       | 0.90       | 0.09       | 0.90       | 0.09       | 0.90       | 0.09       | 0.90       |
| <b>Cotinine</b>                        | mcg/collection | 0.09       | 0.90       | 0.09       | 0.90       | 0.09       | 0.90       | 0.09       | 0.90       | 0.09       | 0.90       |
| <b>Myosmine</b>                        | mcg/collection | 0.09       | 0.90       | 0.09       | 0.90       | 0.09       | 0.90       | 0.09       | 0.90       | 0.09       | 0.90       |
| <b>Nicotine N Oxide</b>                | mcg/collection | 0.31       | 0.90       | 0.31       | 0.90       | 0.09       | 0.90       | 0.09       | 0.90       | 0.09       | 0.90       |
| <b>Nornicotine</b>                     | mcg/collection | 0.14       | 0.90       | 0.14       | 0.90       | 0.09       | 0.90       | 0.09       | 0.90       | 0.09       | 0.90       |
| <b>Anabasine</b>                       | mcg/collection | 0.09       | 0.89       | 0.09       | 0.91       | 0.09       | 0.91       | 0.09       | 0.91       | 0.09       | 0.91       |
| <b>Anatabine</b>                       | mcg/collection | 0.09       | 0.90       | 0.09       | 0.90       | 0.09       | 0.90       | 0.09       | 0.90       | 0.09       | 0.90       |
| <b>NNK</b>                             | mcg/collection | 0.003      | 0.03       | NT         |
| <b>NNN</b>                             | mcg/collection | 0.003      | 0.03       | NT         |
| <b>Metals</b>                          |                | <b>LOD</b> | <b>LOQ</b> |
| <b>Arsenic</b>                         | ng/collection  | 10.00      | 50.00      | 10.00      | 50.00      | 10.00      | 50.00      | 10.00      | 50.00      | 10.00      | 50.00      |
| <b>Beryllium</b>                       | ng/collection  | 2.20       | 20.00      | 2.20       | 20.00      | 2.20       | 20.00      | 2.20       | 20.00      | 2.20       | 20.00      |
| <b>Cadmium</b>                         | ng/collection  | 1.00       | 5.00       | 1.00       | 5.00       | 1.00       | 5.00       | 1.00       | 5.00       | 1.00       | 5.00       |
| <b>Chromium</b>                        | ng/collection  | 10.00      | 50.00      | 10.00      | 50.00      | 10.00      | 50.00      | 10.00      | 50.00      | 10.00      | 50.00      |
| <b>Cobalt</b>                          | ng/collection  | 0.50       | 5.00       | 0.50       | 5.00       | 0.50       | 5.00       | 0.50       | 5.00       | 0.50       | 5.00       |
| <b>Copper</b>                          | ng/collection  | 25.00      | 75.00      | 25.00      | 75.00      | 25.00      | 75.00      | 25.00      | 75.00      | 25.00      | 75.00      |
| <b>Gold</b>                            | ng/collection  | 170.00     | 200.00     | NT         |
| <b>Iron</b>                            | ng/collection  | 100.00     | 200.00     | 100.00     | 200.00     | 100.00     | 200.00     | 100.00     | 200.00     | 100.00     | 200.00     |
| <b>Lead</b>                            | ng/collection  | 2.50       | 10.00      | 2.50       | 10.00      | 2.50       | 10.00      | 2.50       | 10.00      | 2.50       | 10.00      |
| <b>Nickel</b>                          | ng/collection  | 5.00       | 10.00      | 5.00       | 10.00      | 5.00       | 10.00      | 5.00       | 10.00      | 5.00       | 10.00      |
| <b>Selenium</b>                        | ng/collection  | 3.90       | 20.00      | 3.90       | 20.00      | 3.90       | 20.00      | 3.90       | 20.00      | 3.90       | 20.00      |
| <b>Silver</b>                          | ng/collection  | 1.00       | 5.00       | 1.00       | 5.00       | 1.00       | 5.00       | 1.00       | 5.00       | 1.00       | 5.00       |
| <b>Tin</b>                             | ng/collection  | 10.00      | 50.00      | 10.00      | 50.00      | 10.00      | 50.00      | 10.00      | 50.00      | 10.00      | 50.00      |
| <b>Zinc</b>                            | ng/collection  | 150.00     | 350.00     | 150.00     | 350.00     | 150.00     | 350.00     | 150.00     | 350.00     | 150.00     | 350.00     |

| Organic Acids      |                | LOD  | LOQ   | LOD  | LOQ   | LOD   | LOQ    | LOD  | LOQ   | LOD  | LOQ   |
|--------------------|----------------|------|-------|------|-------|-------|--------|------|-------|------|-------|
| Benzoic Acid       | mg/collection  | 0.09 | 0.88  | 0.09 | 0.88  | 0.04  | 0.35   | 0.09 | 0.88  | 0.15 | 0.88  |
| Propionic Acid     | mcg/collection | 3.53 | 35.31 | 3.53 | 35.31 | 43.99 | 352.71 | 3.53 | 35.31 | 6.19 | 35.31 |
| VOCs               |                | LOD  | LOQ   | LOD  | LOQ   | LOD   | LOQ    | LOD  | LOQ   | LOD  | LOQ   |
| 1,3-Butadiene      | mcg/collection | 0.05 | 0.20  | NT   | NT    | NT    | NT     | NT   | NT    | NT   | NT    |
| Acrylonitrile      | mcg/collection | 0.04 | 0.21  | NT   | NT    | NT    | NT     | NT   | NT    | NT   | NT    |
| Benzene            | mcg/collection | 0.06 | 0.30  | NT   | NT    | NT    | NT     | NT   | NT    | NT   | NT    |
| Isoprene           | mcg/collection | 0.08 | 0.25  | NT   | NT    | NT    | NT     | NT   | NT    | NT   | NT    |
| Propylene Oxide    | mcg/collection | 0.15 | 0.85  | NT   | NT    | NT    | NT     | NT   | NT    | NT   | NT    |
| Toluene            | mcg/collection | 0.09 | 0.35  | NT   | NT    | NT    | NT     | NT   | NT    | NT   | NT    |
| Esters & Alcohols  |                | LOD  | LOQ   | LOD  | LOQ   | LOD   | LOQ    | LOD  | LOQ   | LOD  | LOQ   |
| 1-Butanol          | mcg/collection | 1.62 | 16.20 | NT   | NT    | NT    | NT     | NT   | NT    | NT   | NT    |
| Benzyl Acetate     | mcg/collection | 2.51 | 25.12 | NT   | NT    | NT    | NT     | NT   | NT    | NT   | NT    |
| Ethyl Acetate      | mcg/collection | 2.88 | 28.76 | NT   | NT    | NT    | NT     | NT   | NT    | NT   | NT    |
| Ethyl Acetoacetate | mcg/collection | 2.05 | 20.54 | NT   | NT    | NT    | NT     | NT   | NT    | NT   | NT    |
| Isoamyl Acetate    | mcg/collection | 1.75 | 17.52 | NT   | NT    | NT    | NT     | NT   | NT    | NT   | NT    |
| Isobutyl Acetate   | mcg/collection | 1.74 | 17.36 | NT   | NT    | NT    | NT     | NT   | NT    | NT   | NT    |
| Methyl Acetate     | mcg/collection | 1.87 | 18.66 | NT   | NT    | NT    | NT     | NT   | NT    | NT   | NT    |

## 1.6 Polar Menthol 18 mg/mL Intense Per Collection Limit of Detection and Quantification Values

| Parameter/<br>Constituent | Units         | T0    |       | T3    |       | T6    |       | T9    |       | T12   |       |
|---------------------------|---------------|-------|-------|-------|-------|-------|-------|-------|-------|-------|-------|
| pH                        | NA            | NA    | NA    | NA    | NA    | NA    | NA    | NA    | NA    | NA    | NA    |
| Primary Constituents      |               | LOD   | LOQ   |
| Nicotine                  | mg/collection | 0.20  | 2.02  | 0.20  | 1.99  | 0.20  | 2.03  | 0.20  | 2.02  | 0.20  | 2.09  |
| Glycerol                  | mg/collection | 0.25  | 6.29  | 0.25  | 2.51  | 0.25  | 2.52  | 0.25  | 2.52  | 0.25  | 2.52  |
| Propylene Glycol          | mg/collection | 0.42  | 4.12  | 0.41  | 4.11  | 0.41  | 4.16  | 0.41  | 4.02  | 0.41  | 4.28  |
| Water                     | mg/collection | 24.76 | 24.81 | 24.54 | 24.54 | 24.54 | 24.54 | 24.54 | 24.54 | 24.16 | 24.16 |

|                                        |                |            |            |            |            |            |            |            |            |            |            |
|----------------------------------------|----------------|------------|------------|------------|------------|------------|------------|------------|------------|------------|------------|
| <b>Menthol</b>                         | mg/collection  | 0.16       | 1.58       | 0.16       | 1.61       | 0.16       | 1.60       | 0.16       | 1.59       | 0.16       | 1.64       |
| <b>Diethylene Glycol</b>               | mg/collection  | 0.17       | 1.76       | 0.16       | 1.65       | 0.16       | 1.67       | 0.16       | 1.67       | 0.17       | 1.66       |
| <b>Ethylene Glycol</b>                 | mg/collection  | 0.18       | 1.77       | 0.18       | 1.76       | 0.18       | 1.78       | 0.18       | 1.79       | 0.18       | 1.77       |
| <b>Carbonyls &amp; Glycidol</b>        |                | <b>LOD</b> | <b>LOQ</b> |
| <b>Acetaldehyde</b>                    | mcg/collection | 0.20       | 1.32       | 0.20       | 1.32       | 0.24       | 1.31       | 0.24       | 1.31       | 0.25       | 1.32       |
| <b>Acrolein</b>                        | mcg/collection | 0.13       | 1.32       | 0.13       | 1.32       | 0.18       | 1.32       | 0.18       | 1.32       | 0.38       | 1.31       |
| <b>Diacetyl</b>                        | mcg/collection | 0.14       | 1.33       | 0.14       | 1.34       | 0.13       | 1.34       | 0.13       | 1.30       | 0.26       | 1.30       |
| <b>Formaldehyde</b>                    | mcg/collection | 0.29       | 1.31       | 0.29       | 1.31       | 0.44       | 1.31       | 0.44       | 1.31       | 0.76       | 1.32       |
| <b>Glycidol</b>                        | mcg/collection | 0.003      | 0.03       | 0.003      | 0.03       | 0.003      | 0.03       | 0.003      | 0.03       | 0.003      | 0.03       |
| <b>Acetyl Propionyl</b>                | mcg/collection | 0.13       | 1.31       | 0.13       | 1.32       | 0.13       | 1.32       | 0.13       | 1.33       | 0.18       | 1.33       |
| <b>Butyraldehyde</b>                   | mcg/collection | 0.14       | 1.32       | 0.14       | 1.32       | 0.13       | 1.32       | 0.13       | 1.30       | 0.31       | 1.32       |
| <b>Crotonaldehyde</b>                  | mcg/collection | 0.13       | 1.31       | 0.13       | 1.31       | 0.21       | 1.32       | 0.21       | 1.32       | 0.37       | 1.29       |
| <b>Furfural</b>                        | mcg/collection | 0.18       | 1.32       | 0.18       | 1.32       | 0.22       | 1.32       | 0.22       | 1.32       | 0.30       | 1.32       |
| <b>Nicotine Degradants &amp; TSNAs</b> |                | <b>LOD</b> | <b>LOQ</b> |
| <b>β-Nicotyrine</b>                    | mcg/collection | 0.10       | 1.05       | 0.10       | 1.05       | 0.11       | 1.06       | 0.11       | 1.06       | 0.11       | 1.06       |
| <b>Cotinine</b>                        | mcg/collection | 0.10       | 1.05       | 0.10       | 1.05       | 0.11       | 1.06       | 0.11       | 1.06       | 0.11       | 1.06       |
| <b>Myosmine</b>                        | mcg/collection | 0.10       | 1.05       | 0.10       | 1.05       | 0.11       | 1.05       | 0.11       | 1.05       | 0.11       | 1.05       |
| <b>Nicotine N Oxide</b>                | mcg/collection | 0.37       | 1.06       | 0.37       | 1.06       | 0.11       | 1.05       | 0.11       | 1.05       | 0.11       | 1.05       |
| <b>Nornicotine</b>                     | mcg/collection | 0.17       | 1.05       | 0.17       | 1.05       | 0.11       | 1.05       | 0.11       | 1.05       | 0.11       | 1.05       |
| <b>Anabasine</b>                       | mcg/collection | 0.11       | 1.04       | 0.11       | 1.04       | 0.11       | 1.06       | 0.11       | 1.06       | 0.11       | 1.06       |
| <b>Anatabine</b>                       | mcg/collection | 0.11       | 1.06       | 0.11       | 1.06       | 0.11       | 1.06       | 0.11       | 1.06       | 0.11       | 1.06       |
| <b>NNK</b>                             | mcg/collection | 0.002      | 0.03       | NT         |
| <b>NNN</b>                             | mcg/collection | 0.003      | 0.03       | NT         |
| <b>Metals</b>                          |                | <b>LOD</b> | <b>LOQ</b> |
| <b>Arsenic</b>                         | ng/collection  | 10.00      | 50.00      | 10.00      | 50.00      | 10.00      | 50.00      | 10.00      | 50.00      | 10.00      | 50.00      |
| <b>Beryllium</b>                       | ng/collection  | 2.20       | 20.00      | 2.20       | 20.00      | 2.20       | 20.00      | 2.20       | 20.00      | 2.20       | 20.00      |
| <b>Cadmium</b>                         | ng/collection  | 1.00       | 5.00       | 1.00       | 5.00       | 1.00       | 5.00       | 1.00       | 5.00       | 1.00       | 5.00       |
| <b>Chromium</b>                        | ng/collection  | 10.00      | 50.00      | 10.00      | 50.00      | 10.00      | 50.00      | 10.00      | 50.00      | 10.00      | 50.00      |
| <b>Cobalt</b>                          | ng/collection  | 0.50       | 5.00       | 0.50       | 5.00       | 0.50       | 5.00       | 0.50       | 5.00       | 0.50       | 5.00       |

|                              |                |            |            |            |            |            |            |            |            |            |            |
|------------------------------|----------------|------------|------------|------------|------------|------------|------------|------------|------------|------------|------------|
| <b>Copper</b>                | ng/collection  | 25.00      | 75.00      | 25.00      | 75.00      | 25.00      | 75.00      | 25.00      | 75.00      | 25.00      | 75.00      |
| <b>Gold</b>                  | ng/collection  | 170.00     | 200.00     | NT         |
| <b>Iron</b>                  | ng/collection  | 100.00     | 200.00     | 100.00     | 200.00     | 100.00     | 200.00     | 100.00     | 200.00     | 100.00     | 200.00     |
| <b>Lead</b>                  | ng/collection  | 2.50       | 10.00      | 2.50       | 10.00      | 2.50       | 10.00      | 2.50       | 10.00      | 2.50       | 10.00      |
| <b>Nickel</b>                | ng/collection  | 5.00       | 10.00      | 5.00       | 10.00      | 5.00       | 10.00      | 5.00       | 10.00      | 5.00       | 10.00      |
| <b>Selenium</b>              | ng/collection  | 3.90       | 20.00      | 3.90       | 20.00      | 3.90       | 20.00      | 3.90       | 20.00      | 3.90       | 20.00      |
| <b>Silver</b>                | ng/collection  | 1.00       | 5.00       | 1.00       | 5.00       | 1.00       | 5.00       | 1.00       | 5.00       | 1.00       | 5.00       |
| <b>Tin</b>                   | ng/collection  | 10.00      | 50.00      | 10.00      | 50.00      | 10.00      | 50.00      | 10.00      | 50.00      | 10.00      | 50.00      |
| <b>Zinc</b>                  | ng/collection  | 150.00     | 350.00     | 150.00     | 350.00     | 150.00     | 350.00     | 150.00     | 350.00     | 150.00     | 350.00     |
| <b>Organic Acids</b>         |                | <b>LOD</b> | <b>LOQ</b> |
| <b>Benzoic Acid</b>          | mg/collection  | 0.09       | 0.88       | 0.09       | 0.88       | 0.06       | 0.35       | 0.09       | 0.88       | 0.15       | 0.88       |
| <b>Propionic Acid</b>        | mcg/collection | 3.53       | 35.31      | 3.53       | 35.31      | 61.89      | 352.71     | 3.53       | 35.31      | 6.19       | 35.31      |
| <b>VOCs</b>                  |                | <b>LOD</b> | <b>LOQ</b> |
| <b>1,3-Butadiene</b>         | mcg/collection | 0.05       | 0.20       | NT         |
| <b>Acrylonitrile</b>         | mcg/collection | 0.04       | 0.21       | NT         |
| <b>Benzene</b>               | mcg/collection | 0.06       | 0.30       | NT         |
| <b>Isoprene</b>              | mcg/collection | 0.08       | 0.25       | NT         |
| <b>Propylene Oxide</b>       | mcg/collection | 0.15       | 0.85       | NT         |
| <b>Toluene</b>               | mcg/collection | 0.09       | 0.35       | NT         |
| <b>Esters &amp; Alcohols</b> |                | <b>LOD</b> | <b>LOQ</b> |
| <b>1-Butanol</b>             | mcg/collection | 1.62       | 16.20      | NT         |
| <b>Benzyl Acetate</b>        | mcg/collection | 2.51       | 25.12      | NT         |
| <b>Ethyl Acetate</b>         | mcg/collection | 2.88       | 28.76      | NT         |
| <b>Ethyl Acetoacetate</b>    | mcg/collection | 2.05       | 20.54      | NT         |
| <b>Isoamyl Acetate</b>       | mcg/collection | 1.75       | 17.52      | NT         |
| <b>Isobutyl Acetate</b>      | mcg/collection | 1.74       | 17.36      | NT         |
| <b>Methyl Acetate</b>        | mcg/collection | 1.87       | 18.66      | NT         |

### 1.7 Autumn Tobacco 18 mg/mL Non-Intense Per Collection Limit of Detection and Quantification Values

| Parameter/<br>Constituent   | Units          | T0    |       | T3    |       | T6    |      | T9    |      | T12   |       |
|-----------------------------|----------------|-------|-------|-------|-------|-------|------|-------|------|-------|-------|
| pH                          | NA             | NA    | NA    | NA    | NA    | NA    | NA   | NA    | NA   | NA    | NA    |
| Primary Constituents        |                | LOD   | LOQ   | LOD   | LOQ   | LOD   | LOQ  | LOD   | LOQ  | LOD   | LOQ   |
| Nicotine                    | mg/collection  | 0.15  | 1.50  | 0.15  | 1.50  | 0.05  | 0.45 | 0.05  | 0.45 | 0.23  | 2.25  |
| Glycerol                    | mg/collection  | 1.25  | 12.54 | 1.25  | 12.63 | 0.38  | 3.78 | 0.59  | 5.90 | 1.88  | 18.96 |
| Propylene Glycol            | mg/collection  | 0.40  | 4.03  | 0.40  | 4.01  | 0.29  | 2.93 | 0.60  | 6.02 | 0.60  | 6.02  |
| Water                       | mg/collection  | 4.63  | 9.97  | 4.63  | 9.96  | 1.39  | 3.08 | 1.39  | 3.01 | 6.95  | 15.10 |
| Menthol                     | mg/collection  | 0.05  | 0.48  | 0.05  | 0.48  | 0.01  | 0.14 | 0.01  | 0.14 | 0.07  | 0.74  |
| Diethylene Glycol           | mg/collection  | 0.04  | 0.24  | 0.04  | 0.28  | 0.01  | 0.08 | 0.01  | 0.08 | 0.07  | 0.41  |
| Ethylene Glycol             | mg/collection  | 0.03  | 0.25  | 0.03  | 0.25  | 0.01  | 0.07 | 0.01  | 0.08 | 0.05  | 0.46  |
| Carbonyls & Glycidol        |                | LOD   | LOQ   | LOD   | LOQ   | LOD   | LOQ  | LOD   | LOQ  | LOD   | LOQ   |
| Acetaldehyde                | mcg/collection | 0.20  | 1.13  | 0.20  | 1.13  | 0.20  | 1.13 | 0.20  | 1.13 | 0.19  | 1.13  |
| Acrolein                    | mcg/collection | 0.15  | 1.13  | 0.15  | 1.13  | 0.15  | 1.13 | 0.15  | 1.13 | 0.14  | 1.13  |
| Diacetyl                    | mcg/collection | 0.11  | 1.15  | 0.11  | 1.12  | 0.11  | 1.12 | 0.11  | 1.13 | 0.16  | 1.13  |
| Formaldehyde                | mcg/collection | 0.38  | 1.13  | 0.38  | 1.13  | 0.38  | 1.13 | 0.38  | 1.13 | 0.15  | 1.13  |
| Glycidol                    | mcg/collection | 0.003 | 0.03  | 0.003 | 0.03  | 0.003 | 0.03 | 0.003 | 0.03 | 0.005 | 0.05  |
| Acetyl Propionyl            | mcg/collection | 0.11  | 1.13  | 0.11  | 1.14  | 0.11  | 1.14 | 0.11  | 1.14 | 0.15  | 1.14  |
| Butyraldehyde               | mcg/collection | 0.11  | 1.13  | 0.11  | 1.11  | 0.11  | 1.13 | 0.11  | 1.13 | 0.12  | 1.13  |
| Crotonaldehyde              | mcg/collection | 0.18  | 1.11  | 0.18  | 1.13  | 0.18  | 1.13 | 0.18  | 1.13 | 0.15  | 1.13  |
| Furfural                    | mcg/collection | 0.19  | 1.13  | 0.19  | 1.13  | 0.19  | 1.13 | 0.19  | 1.13 | 0.21  | 1.13  |
| Nicotine Degradants & TSNAs |                | LOD   | LOQ   | LOD   | LOQ   | LOD   | LOQ  | LOD   | LOQ  | LOD   | LOQ   |
| β-Nicotyrine                | mcg/collection | 0.09  | 0.90  | 0.09  | 0.90  | 0.09  | 0.90 | 0.09  | 0.89 | 0.09  | 0.89  |
| Cotinine                    | mcg/collection | 0.09  | 0.90  | 0.09  | 0.90  | 0.09  | 0.90 | 0.09  | 0.90 | 0.19  | 0.90  |
| Myosmine                    | mcg/collection | 0.09  | 0.90  | 0.09  | 0.90  | 0.09  | 0.90 | 0.09  | 0.91 | 0.09  | 0.91  |
| Nicotine N Oxide            | mcg/collection | 0.09  | 0.90  | 0.09  | 0.90  | 0.09  | 0.90 | 0.09  | 0.89 | 0.22  | 0.89  |
| Nornicotine                 | mcg/collection | 0.09  | 0.90  | 0.09  | 0.90  | 0.09  | 0.90 | 0.09  | 0.90 | 0.23  | 0.90  |
| Anabasine                   | mcg/collection | 0.09  | 0.91  | 0.10  | 0.91  | 0.09  | 0.91 | 0.09  | 0.91 | 0.13  | 0.91  |
| Anatabine                   | mcg/collection | 0.09  | 0.90  | 0.09  | 0.90  | 0.09  | 0.90 | 0.09  | 0.91 | 0.11  | 0.91  |

## Supplementary Material

|                              |                |            |            |            |            |            |            |            |            |            |            |
|------------------------------|----------------|------------|------------|------------|------------|------------|------------|------------|------------|------------|------------|
| <b>NNK</b>                   | mcg/collection | 0.001      | 0.003      | 0.001      | 0.003      | NT         | NT         | NT         | NT         | NT         | NT         |
| <b>NNN</b>                   | mcg/collection | 0.001      | 0.003      | 0.001      | 0.003      | NT         | NT         | NT         | NT         | NT         | NT         |
| <b>Metals</b>                |                | <b>LOD</b> | <b>LOQ</b> |
| <b>Arsenic</b>               | ng/collection  | 10.00      | 50.00      | 10.00      | 50.00      | 10.00      | 50.00      | 10.00      | 50.00      | 10.00      | 50.00      |
| <b>Beryllium</b>             | ng/collection  | 2.20       | 20.00      | 2.20       | 20.00      | 2.20       | 20.00      | 2.20       | 20.00      | 2.20       | 20.00      |
| <b>Cadmium</b>               | ng/collection  | 1.00       | 5.00       | 1.00       | 5.00       | 1.00       | 5.00       | 1.00       | 5.00       | 1.00       | 5.00       |
| <b>Chromium</b>              | ng/collection  | 10.00      | 50.00      | 10.00      | 50.00      | 10.00      | 50.00      | 10.00      | 50.00      | 10.00      | 50.00      |
| <b>Cobalt</b>                | ng/collection  | 0.50       | 5.00       | 0.50       | 5.00       | 0.50       | 5.00       | 0.50       | 5.00       | 0.50       | 5.00       |
| <b>Copper</b>                | ng/collection  | 25.00      | 75.00      | 25.00      | 75.00      | 25.00      | 75.00      | 25.00      | 75.00      | 25.00      | 75.00      |
| <b>Gold</b>                  | ng/collection  | 170.00     | 200.00     | 170.00     | 200.20     | 170.00     | 200.00     | 170.00     | 200.00     | 170.00     | 200.00     |
| <b>Iron</b>                  | ng/collection  | 100.00     | 200.00     | 100.00     | 200.00     | 100.00     | 200.00     | 100.00     | 200.00     | 100.00     | 200.00     |
| <b>Lead</b>                  | ng/collection  | 2.50       | 10.00      | 2.50       | 10.00      | 2.50       | 10.00      | 2.50       | 10.00      | 2.50       | 10.00      |
| <b>Nickel</b>                | ng/collection  | 5.00       | 10.00      | 5.00       | 10.00      | 5.00       | 10.00      | 5.00       | 10.00      | 5.00       | 10.00      |
| <b>Selenium</b>              | ng/collection  | 3.90       | 20.00      | 3.90       | 20.00      | 3.90       | 20.00      | 3.90       | 20.00      | 3.90       | 20.00      |
| <b>Silver</b>                | ng/collection  | 1.00       | 5.00       | 1.00       | 5.00       | 1.00       | 5.00       | 1.00       | 5.00       | 1.00       | 5.00       |
| <b>Tin</b>                   | ng/collection  | 10.00      | 50.00      | 10.00      | 50.00      | 10.00      | 50.00      | 10.00      | 50.00      | 10.00      | 50.00      |
| <b>Zinc</b>                  | ng/collection  | 150.00     | 350.00     | 150.00     | 350.00     | 150.00     | 350.00     | 150.00     | 350.00     | 150.00     | 350.00     |
| <b>Organic Acids</b>         |                | <b>LOD</b> | <b>LOQ</b> |
| <b>Benzoic Acid</b>          | mg/collection  | 0.06       | 0.35       | 0.06       | 0.35       | 0.04       | 0.35       | 0.06       | 0.35       | 0.07       | 0.70       |
| <b>Propionic Acid</b>        | mcg/collection | 35.27      | 352.71     | 61.89      | 354.83     | 35.27      | 354.83     | 35.27      | 354.83     | 70.61      | 706.10     |
| <b>VOCs</b>                  |                | <b>LOD</b> | <b>LOQ</b> |
| <b>1,3-butadiene</b>         | mcg/collection | 0.05       | 0.20       | 0.07       | 0.20       | NT         | NT         | NT         | NT         | NT         | NT         |
| <b>Acrylonitrile</b>         | mcg/collection | 0.04       | 0.21       | 0.02       | 0.20       | NT         | NT         | NT         | NT         | NT         | NT         |
| <b>Benzene</b>               | mcg/collection | 0.06       | 0.31       | 0.06       | 0.31       | NT         | NT         | NT         | NT         | NT         | NT         |
| <b>Isoprene</b>              | mcg/collection | 0.08       | 0.27       | 0.06       | 0.27       | NT         | NT         | NT         | NT         | NT         | NT         |
| <b>Propylene Oxide</b>       | mcg/collection | 0.15       | 0.87       | 0.23       | 0.87       | NT         | NT         | NT         | NT         | NT         | NT         |
| <b>Toluene</b>               | mcg/collection | 0.09       | 0.35       | 0.04       | 0.35       | NT         | NT         | NT         | NT         | NT         | NT         |
| <b>Esters &amp; Alcohols</b> |                | <b>LOD</b> | <b>LOQ</b> |
| <b>1-Butanol</b>             | mcg/collection | 1.91       | 19.47      | 1.91       | 19.71      | NT         | NT         | NT         | NT         | NT         | NT         |



|                           |                |      |       |      |       |    |    |    |    |    |    |
|---------------------------|----------------|------|-------|------|-------|----|----|----|----|----|----|
| <b>Benzyl Acetate</b>     | mcg/collection | 2.52 | 25.22 | 2.52 | 25.17 | NT | NT | NT | NT | NT | NT |
| <b>Ethyl Acetate</b>      | mcg/collection | 2.00 | 20.48 | 2.00 | 20.24 | NT | NT | NT | NT | NT | NT |
| <b>Ethyl Acetoacetate</b> | mcg/collection | 3.90 | 27.83 | 3.90 | 24.81 | NT | NT | NT | NT | NT | NT |
| <b>Isoamyl Acetate</b>    | mcg/collection | 2.03 | 20.78 | 2.03 | 20.83 | NT | NT | NT | NT | NT | NT |
| <b>Isobutyl Acetate</b>   | mcg/collection | 2.02 | 20.59 | 2.02 | 20.50 | NT | NT | NT | NT | NT | NT |
| <b>Methyl Acetate</b>     | mcg/collection | 2.09 | 21.60 | 2.09 | 21.07 | NT | NT | NT | NT | NT | NT |

### 1.8 Autumn Tobacco 18 mg/mL Intense Per Collection Limit of Detection and Quantification Values

| Parameter/<br>Constituent       | Units          | T0         |            | T3         |            | T6         |            | T9         |            | T12        |            |
|---------------------------------|----------------|------------|------------|------------|------------|------------|------------|------------|------------|------------|------------|
| <b>pH</b>                       | NA             | NA         | NA         | NA         | NA         | NA         | NA         | NA         | NA         | NA         | NA         |
| <b>Primary Constituents</b>     |                | <b>LOD</b> | <b>LOQ</b> |
| <b>Nicotine</b>                 | mg/collection  | 0.15       | 1.50       | 0.15       | 1.50       | 0.05       | 0.45       | 0.05       | 0.45       | 0.23       | 2.25       |
| <b>Glycerol</b>                 | mg/collection  | 1.25       | 12.54      | 1.25       | 12.63      | 0.38       | 3.78       | 0.38       | 3.75       | 1.88       | 18.96      |
| <b>Propylene Glycol</b>         | mg/collection  | 0.40       | 4.03       | 0.40       | 4.01       | 0.36       | 3.62       | 0.53       | 5.33       | 0.60       | 6.02       |
| <b>Water</b>                    | mg/collection  | 4.63       | 9.97       | 4.63       | 9.96       | 1.39       | 3.08       | 1.39       | 3.01       | 6.95       | 15.10      |
| <b>Menthol</b>                  | mg/collection  | 0.05       | 0.48       | 0.05       | 0.48       | 0.01       | 0.14       | 0.01       | 0.14       | 0.07       | 0.74       |
| <b>Diethylene Glycol</b>        | mg/collection  | 0.04       | 0.24       | 0.04       | 0.26       | 0.01       | 0.08       | 0.01       | 0.08       | 0.07       | 0.41       |
| <b>Ethylene Glycol</b>          | mg/collection  | 0.03       | 0.25       | 0.03       | 0.27       | 0.01       | 0.07       | 0.01       | 0.08       | 0.05       | 0.46       |
| <b>Carbonyls &amp; Glycidol</b> |                | <b>LOD</b> | <b>LOQ</b> |
| <b>Acetaldehyde</b>             | mcg/collection | 0.24       | 1.32       | 0.24       | 1.31       | 0.20       | 1.13       | 0.24       | 1.32       | 0.22       | 1.32       |
| <b>Acrolein</b>                 | mcg/collection | 0.18       | 1.31       | 0.18       | 1.32       | 0.15       | 1.13       | 0.18       | 1.32       | 0.16       | 1.32       |
| <b>Diacetyl</b>                 | mcg/collection | 0.13       | 1.34       | 0.13       | 1.30       | 0.11       | 1.12       | 0.13       | 1.32       | 0.18       | 1.32       |
| <b>Formaldehyde</b>             | mcg/collection | 0.44       | 1.32       | 0.44       | 1.31       | 0.38       | 1.13       | 0.44       | 1.32       | 0.17       | 1.31       |
| <b>Glycidol</b>                 | mcg/collection | 0.004      | 0.03       | 0.003      | 0.03       | 0.003      | 0.03       | 0.003      | 0.03       | 0.005      | 0.05       |
| <b>Acetyl Propionyl</b>         | mcg/collection | 0.13       | 1.32       | 0.13       | 1.33       | 0.11       | 1.14       | 0.13       | 1.33       | 0.18       | 1.33       |
| <b>Butyraldehyde</b>            | mcg/collection | 0.13       | 1.32       | 0.13       | 1.30       | 0.11       | 1.13       | 0.13       | 1.32       | 0.14       | 1.32       |
| <b>Crotonaldehyde</b>           | mcg/collection | 0.21       | 1.29       | 0.21       | 1.32       | 0.18       | 1.13       | 0.21       | 1.32       | 0.18       | 1.31       |

|                                        |                |            |            |            |            |            |            |            |            |            |            |
|----------------------------------------|----------------|------------|------------|------------|------------|------------|------------|------------|------------|------------|------------|
| <b>Furfural</b>                        | mcg/collection | 0.22       | 1.32       | 0.22       | 1.32       | 0.19       | 1.13       | 0.22       | 1.32       | 0.25       | 1.32       |
| <b>Nicotine Degradants &amp; TSNAs</b> |                | <b>LOD</b> | <b>LOQ</b> |
| <b>β-Nicotyrine</b>                    | mcg/collection | 0.11       | 1.06       | 0.10       | 1.06       | 0.11       | 1.06       | 0.11       | 1.04       | 0.10       | 1.04       |
| <b>Cotinine</b>                        | mcg/collection | 0.11       | 1.06       | 0.10       | 1.06       | 0.11       | 1.06       | 0.11       | 1.05       | 0.22       | 1.05       |
| <b>Myosmine</b>                        | mcg/collection | 0.11       | 1.05       | 0.10       | 1.05       | 0.11       | 1.05       | 0.11       | 1.06       | 0.11       | 1.06       |
| <b>Nicotine N Oxide</b>                | mcg/collection | 0.11       | 1.05       | 0.10       | 1.05       | 0.11       | 1.05       | 0.11       | 1.04       | 0.26       | 1.04       |
| <b>Nornicotine</b>                     | mcg/collection | 0.11       | 1.05       | 0.10       | 1.05       | 0.11       | 1.05       | 0.11       | 1.04       | 0.27       | 1.04       |
| <b>Anabasine</b>                       | mcg/collection | 0.11       | 1.06       | 0.12       | 1.06       | 0.11       | 1.06       | 0.11       | 1.06       | 0.15       | 1.06       |
| <b>Anatabine</b>                       | mcg/collection | 0.11       | 1.06       | 0.11       | 1.06       | 0.11       | 1.06       | 0.11       | 1.06       | 0.12       | 1.06       |
| <b>NNK</b>                             | mcg/collection | 0.001      | 0.003      | 0.001      | 0.003      | NT         | NT         | NT         | NT         | NT         | NT         |
| <b>NNN</b>                             | mcg/collection | 0.001      | 0.003      | 0.001      | 0.003      | NT         | NT         | NT         | NT         | NT         | NT         |
| <b>Metals</b>                          |                | <b>LOD</b> | <b>LOQ</b> |
| <b>Arsenic</b>                         | ng/collection  | 10.00      | 50.00      | 10.00      | 50.00      | 10.00      | 50.00      | 10.00      | 50.00      | 10.00      | 50.00      |
| <b>Beryllium</b>                       | ng/collection  | 2.20       | 20.00      | 2.20       | 20.00      | 2.20       | 20.00      | 2.20       | 20.00      | 2.20       | 20.00      |
| <b>Cadmium</b>                         | ng/collection  | 1.00       | 5.00       | 1.00       | 5.00       | 1.00       | 5.00       | 1.00       | 5.00       | 1.00       | 5.00       |
| <b>Chromium</b>                        | ng/collection  | 10.00      | 50.00      | 10.00      | 50.00      | 10.00      | 50.00      | 10.00      | 50.00      | 10.00      | 50.00      |
| <b>Cobalt</b>                          | ng/collection  | 0.50       | 5.00       | 0.50       | 5.00       | 0.50       | 5.00       | 0.50       | 5.00       | 0.50       | 5.00       |
| <b>Copper</b>                          | ng/collection  | 25.00      | 75.00      | 25.00      | 75.00      | 25.00      | 75.00      | 25.00      | 75.00      | 25.00      | 75.00      |
| <b>Gold</b>                            | ng/collection  | 170.00     | 200.00     | 170.00     | 200.20     | 170.00     | 200.00     | 170.00     | 200.00     | 170.00     | 200.00     |
| <b>Iron</b>                            | ng/collection  | 100.00     | 200.00     | 100.00     | 200.00     | 100.00     | 200.00     | 100.00     | 200.00     | 100.00     | 200.00     |
| <b>Lead</b>                            | ng/collection  | 2.50       | 10.00      | 2.50       | 10.00      | 2.50       | 10.00      | 2.50       | 10.00      | 2.50       | 10.00      |
| <b>Nickel</b>                          | ng/collection  | 5.00       | 10.00      | 5.00       | 10.00      | 5.00       | 10.00      | 5.00       | 10.00      | 5.00       | 10.00      |
| <b>Selenium</b>                        | ng/collection  | 3.90       | 20.00      | 3.90       | 20.00      | 3.90       | 20.00      | 3.90       | 20.00      | 3.90       | 20.00      |
| <b>Silver</b>                          | ng/collection  | 1.00       | 5.00       | 1.00       | 5.00       | 1.00       | 5.00       | 1.00       | 5.00       | 1.00       | 5.00       |
| <b>Tin</b>                             | ng/collection  | 10.00      | 50.00      | 10.00      | 50.00      | 10.00      | 50.00      | 10.00      | 50.00      | 10.00      | 50.00      |
| <b>Zinc</b>                            | ng/collection  | 150.00     | 350.00     | 150.00     | 350.00     | 150.00     | 350.00     | 150.00     | 350.00     | 150.00     | 350.00     |
| <b>Organic Acids</b>                   |                | <b>LOD</b> | <b>LOQ</b> |
| <b>Benzoic Acid</b>                    | mg/collection  | 0.06       | 0.35       | 0.06       | 0.35       | 0.06       | 0.35       | 0.04       | 0.35       | 0.07       | 0.70       |
| <b>Propionic Acid</b>                  | mcg/collection | 35.27      | 352.71     | 61.89      | 354.83     | 61.89      | 354.83     | 35.31      | 354.83     | 70.61      | 706.10     |

| VOCs               |                | LOD  | LOQ   | LOD  | LOQ   | LOD | LOQ | LOD | LOQ | LOD | LOQ |
|--------------------|----------------|------|-------|------|-------|-----|-----|-----|-----|-----|-----|
| 1,3-butadiene      | mcg/collection | 0.05 | 0.20  | 0.05 | 0.20  | NT  | NT  | NT  | NT  | NT  | NT  |
| Acrylonitrile      | mcg/collection | 0.04 | 0.21  | 0.04 | 0.21  | NT  | NT  | NT  | NT  | NT  | NT  |
| Benzene            | mcg/collection | 0.06 | 0.31  | 0.06 | 0.31  | NT  | NT  | NT  | NT  | NT  | NT  |
| Isoprene           | mcg/collection | 0.08 | 0.27  | 0.08 | 0.27  | NT  | NT  | NT  | NT  | NT  | NT  |
| Propylene Oxide    | mcg/collection | 0.15 | 0.88  | 0.15 | 0.87  | NT  | NT  | NT  | NT  | NT  | NT  |
| Toluene            | mcg/collection | 0.09 | 0.35  | 0.09 | 0.35  | NT  | NT  | NT  | NT  | NT  | NT  |
| Esters & Alcohols  |                | LOD  | LOQ   | LOD  | LOQ   | LOD | LOQ | LOD | LOQ | LOD | LOQ |
| 1-Butanol          | mcg/collection | 1.91 | 19.47 | 1.91 | 19.66 | NT  | NT  | NT  | NT  | NT  | NT  |
| Benzyl Acetate     | mcg/collection | 2.52 | 25.22 | 2.52 | 25.65 | NT  | NT  | NT  | NT  | NT  | NT  |
| Ethyl Acetate      | mcg/collection | 2.00 | 20.48 | 2.00 | 20.38 | NT  | NT  | NT  | NT  | NT  | NT  |
| Ethyl Acetoacetate | mcg/collection | 3.90 | 27.83 | 3.90 | 25.01 | NT  | NT  | NT  | NT  | NT  | NT  |
| Isoamyl Acetate    | mcg/collection | 2.03 | 20.78 | 2.03 | 21.02 | NT  | NT  | NT  | NT  | NT  | NT  |
| Isobutyl Acetate   | mcg/collection | 2.02 | 20.59 | 2.02 | 20.78 | NT  | NT  | NT  | NT  | NT  | NT  |
| Methyl Acetate     | mcg/collection | 2.09 | 21.60 | 2.09 | 21.98 | NT  | NT  | NT  | NT  | NT  | NT  |

## 1.9 Ruby Menthol 18 mg/mL Non-Intense Per Collection Limit of Detection and Quantification Values

| Parameter/<br>Constituent | Units         | T0   |       | T3   |       | T6   |      | T9   |       | T12  |       |
|---------------------------|---------------|------|-------|------|-------|------|------|------|-------|------|-------|
| pH                        | NA            | NA   | NA    | NA   | NA    | NA   | NA   | NA   | NA    | NA   | NA    |
| Primary Constituents      |               | LOD  | LOQ   | LOD  | LOQ   | LOD  | LOQ  | LOD  | LOQ   | LOD  | LOQ   |
| Nicotine                  | mg/collection | 0.15 | 1.50  | 0.15 | 1.50  | 0.05 | 0.45 | 0.05 | 0.45  | 0.23 | 2.25  |
| Glycerol                  | mg/collection | 1.25 | 12.54 | 1.25 | 12.63 | 0.59 | 5.93 | 1.02 | 10.19 | 1.88 | 18.96 |
| Propylene Glycol          | mg/collection | 0.40 | 4.03  | 0.40 | 4.01  | 0.24 | 2.41 | 0.60 | 6.02  | 0.60 | 6.02  |
| Water                     | mg/collection | 4.63 | 9.97  | 4.63 | 9.96  | 1.39 | 3.08 | 1.39 | 3.01  | 6.95 | 15.10 |
| Menthol                   | mg/collection | 0.05 | 0.48  | 0.05 | 0.48  | 0.01 | 0.14 | 0.01 | 0.14  | 0.07 | 0.74  |
| Diethylene Glycol         | mg/collection | 0.04 | 0.24  | 0.04 | 0.28  | 0.01 | 0.08 | 0.01 | 0.08  | 0.07 | 0.41  |
| Ethylene Glycol           | mg/collection | 0.03 | 0.25  | 0.03 | 0.25  | 0.01 | 0.07 | 0.01 | 0.08  | 0.05 | 0.46  |

| Carbonyls & Glycidol        |                | LOD    | LOQ    |
|-----------------------------|----------------|--------|--------|--------|--------|--------|--------|--------|--------|--------|--------|
| Acetaldehyde                | mcg/collection | 0.20   | 1.13   | 0.20   | 1.13   | 0.20   | 1.13   | 0.20   | 1.13   | 0.19   | 1.13   |
| Acrolein                    | mcg/collection | 0.15   | 1.13   | 0.15   | 1.13   | 0.15   | 1.13   | 0.15   | 1.13   | 0.14   | 1.13   |
| Diacetyl                    | mcg/collection | 0.11   | 1.15   | 0.11   | 1.12   | 0.11   | 1.12   | 0.11   | 1.13   | 0.16   | 1.13   |
| Formaldehyde                | mcg/collection | 0.38   | 1.13   | 0.38   | 1.13   | 0.38   | 1.13   | 0.38   | 1.13   | 0.15   | 1.13   |
| Glycidol                    | mcg/collection | 0.003  | 0.03   | 0.003  | 0.03   | 0.003  | 0.03   | 0.003  | 0.03   | 0.005  | 0.05   |
| Acetyl Propionyl            | mcg/collection | 0.11   | 1.13   | 0.11   | 1.14   | 0.11   | 1.14   | 0.11   | 1.14   | 0.15   | 1.14   |
| Butyraldehyde               | mcg/collection | 0.11   | 1.13   | 0.11   | 1.11   | 0.11   | 1.13   | 0.11   | 1.13   | 0.12   | 1.13   |
| Crotonaldehyde              | mcg/collection | 0.18   | 1.11   | 0.18   | 1.13   | 0.18   | 1.13   | 0.18   | 1.13   | 0.15   | 1.13   |
| Furfural                    | mcg/collection | 0.19   | 1.13   | 0.19   | 1.13   | 0.19   | 1.13   | 0.19   | 1.13   | 0.21   | 1.13   |
| Nicotine Degradants & TSNAs |                | LOD    | LOQ    |
| β-Nicotyrine                | mcg/collection | 0.09   | 0.90   | 0.09   | 0.90   | 0.09   | 0.90   | 0.09   | 0.89   | 0.09   | 0.89   |
| Cotinine                    | mcg/collection | 0.09   | 0.90   | 0.09   | 0.90   | 0.09   | 0.90   | 0.09   | 0.90   | 0.19   | 0.90   |
| Myosmine                    | mcg/collection | 0.09   | 0.90   | 0.09   | 0.90   | 0.09   | 0.90   | 0.09   | 0.91   | 0.09   | 0.91   |
| Nicotine N Oxide            | mcg/collection | 0.09   | 0.90   | 0.09   | 0.90   | 0.09   | 0.90   | 0.09   | 0.89   | 0.22   | 0.89   |
| Nornicotine                 | mcg/collection | 0.09   | 0.90   | 0.09   | 0.90   | 0.09   | 0.90   | 0.09   | 0.90   | 0.23   | 0.90   |
| Anabasine                   | mcg/collection | 0.09   | 0.91   | 0.10   | 0.91   | 0.09   | 0.91   | 0.09   | 0.91   | 0.13   | 0.91   |
| Anatabine                   | mcg/collection | 0.09   | 0.90   | 0.09   | 0.90   | 0.09   | 0.90   | 0.09   | 0.91   | 0.11   | 0.91   |
| NNK                         | mcg/collection | 0.001  | 0.003  | 0.001  | 0.003  | NT     | NT     | NT     | NT     | NT     | NT     |
| NNN                         | mcg/collection | 0.001  | 0.003  | 0.001  | 0.003  | NT     | NT     | NT     | NT     | NT     | NT     |
| Metals                      |                | LOD    | LOQ    |
| Arsenic                     | ng/collection  | 10.00  | 50.00  | 10.00  | 50.00  | 10.00  | 50.00  | 10.00  | 50.00  | 10.00  | 50.00  |
| Beryllium                   | ng/collection  | 2.20   | 20.00  | 2.20   | 20.00  | 2.20   | 20.00  | 2.20   | 20.00  | 2.20   | 20.00  |
| Cadmium                     | ng/collection  | 1.00   | 5.00   | 1.00   | 5.00   | 1.00   | 5.00   | 1.00   | 5.00   | 1.00   | 5.00   |
| Chromium                    | ng/collection  | 10.00  | 50.00  | 10.00  | 50.00  | 10.00  | 50.00  | 10.00  | 50.00  | 10.00  | 50.00  |
| Cobalt                      | ng/collection  | 0.50   | 5.00   | 0.50   | 5.00   | 0.50   | 5.00   | 0.50   | 5.00   | 0.50   | 5.00   |
| Copper                      | ng/collection  | 25.00  | 75.00  | 25.00  | 75.00  | 25.00  | 75.00  | 25.00  | 75.00  | 25.00  | 75.00  |
| Gold                        | ng/collection  | 170.00 | 200.00 | 170.00 | 200.20 | 170.00 | 200.00 | 170.00 | 200.00 | 170.00 | 200.00 |
| Iron                        | ng/collection  | 100.00 | 200.00 | 100.00 | 200.00 | 100.00 | 200.00 | 100.00 | 200.00 | 100.00 | 200.00 |

|                              |                |            |            |            |            |            |            |            |            |            |            |
|------------------------------|----------------|------------|------------|------------|------------|------------|------------|------------|------------|------------|------------|
| <b>Lead</b>                  | ng/collection  | 2.50       | 10.00      | 2.50       | 10.00      | 2.50       | 10.00      | 2.50       | 10.00      | 2.50       | 10.00      |
| <b>Nickel</b>                | ng/collection  | 5.00       | 10.00      | 5.00       | 10.00      | 5.00       | 10.00      | 5.00       | 10.00      | 5.00       | 10.00      |
| <b>Selenium</b>              | ng/collection  | 3.90       | 20.00      | 3.90       | 20.00      | 3.90       | 20.00      | 3.90       | 20.00      | 3.90       | 20.00      |
| <b>Silver</b>                | ng/collection  | 1.00       | 5.00       | 1.00       | 5.00       | 1.00       | 5.00       | 1.00       | 5.00       | 1.00       | 5.00       |
| <b>Tin</b>                   | ng/collection  | 10.00      | 50.00      | 10.00      | 50.00      | 10.00      | 50.00      | 10.00      | 50.00      | 10.00      | 50.00      |
| <b>Zinc</b>                  | ng/collection  | 150.00     | 350.00     | 150.00     | 350.00     | 150.00     | 350.00     | 150.00     | 350.00     | 150.00     | 350.00     |
| <b>Organic Acids</b>         |                | <b>LOD</b> | <b>LOQ</b> |
| <b>Benzoic Acid</b>          | mg/collection  | 0.04       | 0.35       | 0.06       | 0.35       | 0.04       | 0.35       | 0.06       | 0.35       | 0.07       | 0.70       |
| <b>Propionic Acid</b>        | mcg/collection | 46.17      | 352.71     | 61.89      | 354.83     | 35.27      | 354.83     | 35.27      | 354.83     | 70.61      | 706.10     |
| <b>VOCs</b>                  |                | <b>LOD</b> | <b>LOQ</b> |
| <b>1,3-butadiene</b>         | mcg/collection | 0.05       | 0.20       | 0.07       | 0.20       | NT         | NT         | NT         | NT         | NT         | NT         |
| <b>Acrylonitrile</b>         | mcg/collection | 0.04       | 0.21       | 0.02       | 0.20       | NT         | NT         | NT         | NT         | NT         | NT         |
| <b>Benzene</b>               | mcg/collection | 0.06       | 0.31       | 0.06       | 0.31       | NT         | NT         | NT         | NT         | NT         | NT         |
| <b>Isoprene</b>              | mcg/collection | 0.08       | 0.27       | 0.06       | 0.27       | NT         | NT         | NT         | NT         | NT         | NT         |
| <b>Propylene Oxide</b>       | mcg/collection | 0.15       | 0.87       | 0.23       | 0.87       | NT         | NT         | NT         | NT         | NT         | NT         |
| <b>Toluene</b>               | mcg/collection | 0.09       | 0.35       | 0.04       | 0.35       | NT         | NT         | NT         | NT         | NT         | NT         |
| <b>Esters &amp; Alcohols</b> |                | <b>LOD</b> | <b>LOQ</b> |
| <b>1-Butanol</b>             | mcg/collection | 1.91       | 19.47      | 1.91       | 19.71      | NT         | NT         | NT         | NT         | NT         | NT         |
| <b>Benzyl Acetate</b>        | mcg/collection | 2.52       | 25.22      | 2.52       | 25.17      | NT         | NT         | NT         | NT         | NT         | NT         |
| <b>Ethyl Acetate</b>         | mcg/collection | 2.00       | 20.48      | 2.00       | 20.24      | NT         | NT         | NT         | NT         | NT         | NT         |
| <b>Ethyl Acetoacetate</b>    | mcg/collection | 3.90       | 27.83      | 3.90       | 24.81      | NT         | NT         | NT         | NT         | NT         | NT         |
| <b>Isoamyl Acetate</b>       | mcg/collection | 2.03       | 20.78      | 2.03       | 20.83      | NT         | NT         | NT         | NT         | NT         | NT         |
| <b>Isobutyl Acetate</b>      | mcg/collection | 2.02       | 20.59      | 2.02       | 20.50      | NT         | NT         | NT         | NT         | NT         | NT         |
| <b>Methyl Acetate</b>        | mcg/collection | 2.09       | 21.60      | 2.09       | 21.07      | NT         | NT         | NT         | NT         | NT         | NT         |

### 1.10 Ruby Menthol 18 mg/mL Intense Per Collection Limit of Detection and Quantification Values

| Parameter/<br>Constituent | Units | T0 | T3 | T6 | T9 | T12 |
|---------------------------|-------|----|----|----|----|-----|
|---------------------------|-------|----|----|----|----|-----|

| pH                                     | NA             | NA         | NA         | NA         | NA         | NA         | NA         | NA         | NA         | NA         | NA         |
|----------------------------------------|----------------|------------|------------|------------|------------|------------|------------|------------|------------|------------|------------|
| <b>Primary Constituents</b>            |                | <b>LOD</b> | <b>LOQ</b> |
| Nicotine                               | mg/collection  | 0.15       | 1.50       | 0.15       | 1.50       | 0.05       | 0.45       | 0.05       | 0.45       | 0.23       | 2.25       |
| Glycerol                               | mg/collection  | 1.25       | 12.54      | 1.25       | 12.63      | 0.48       | 4.85       | 1.66       | 16.62      | 1.88       | 18.96      |
| Propylene Glycol                       | mg/collection  | 0.40       | 4.03       | 0.40       | 4.01       | 0.36       | 3.62       | 0.60       | 6.02       | 0.60       | 6.02       |
| Water                                  | mg/collection  | 4.63       | 9.97       | 4.63       | 9.96       | 1.39       | 3.08       | 1.39       | 3.01       | 6.95       | 15.10      |
| Menthol                                | mg/collection  | 0.05       | 0.48       | 0.05       | 0.48       | 0.01       | 0.14       | 0.01       | 0.14       | 0.07       | 0.74       |
| Diethylene Glycol                      | mg/collection  | 0.04       | 0.24       | 0.04       | 0.26       | 0.01       | 0.08       | 0.01       | 0.08       | 0.07       | 0.41       |
| Ethylene Glycol                        | mg/collection  | 0.03       | 0.25       | 0.03       | 0.27       | 0.01       | 0.07       | 0.01       | 0.08       | 0.05       | 0.46       |
| <b>Carbonyls &amp; Glycidol</b>        |                | <b>LOD</b> | <b>LOQ</b> |
| Acetaldehyde                           | mcg/collection | 0.24       | 1.32       | 0.24       | 1.31       | 0.20       | 1.13       | 0.24       | 1.32       | 0.22       | 1.32       |
| Acrolein                               | mcg/collection | 0.18       | 1.31       | 0.18       | 1.32       | 0.15       | 1.13       | 0.18       | 1.32       | 0.16       | 1.32       |
| Diacetyl                               | mcg/collection | 0.13       | 1.34       | 0.13       | 1.30       | 0.11       | 1.12       | 0.13       | 1.32       | 0.18       | 1.32       |
| Formaldehyde                           | mcg/collection | 0.44       | 1.32       | 0.44       | 1.31       | 0.38       | 1.13       | 0.44       | 1.32       | 0.17       | 1.31       |
| Glycidol                               | mcg/collection | 0.004      | 0.03       | 0.003      | 0.03       | 0.003      | 0.03       | 0.003      | 0.03       | 0.005      | 0.05       |
| Acetyl Propionyl                       | mcg/collection | 0.13       | 1.32       | 0.13       | 1.33       | 0.11       | 1.14       | 0.13       | 1.33       | 0.18       | 1.33       |
| Butyraldehyde                          | mcg/collection | 0.13       | 1.32       | 0.13       | 1.30       | 0.11       | 1.13       | 0.13       | 1.32       | 0.14       | 1.32       |
| Crotonaldehyde                         | mcg/collection | 0.21       | 1.29       | 0.21       | 1.32       | 0.18       | 1.13       | 0.21       | 1.32       | 0.18       | 1.31       |
| Furfural                               | mcg/collection | 0.22       | 1.32       | 0.22       | 1.32       | 0.19       | 1.13       | 0.22       | 1.32       | 0.25       | 1.32       |
| <b>Nicotine Degradants &amp; TSNAs</b> |                | <b>LOD</b> | <b>LOQ</b> |
| β-Nicotyrine                           | mcg/collection | 0.11       | 1.06       | 0.10       | 1.06       | 0.11       | 1.06       | 0.11       | 1.04       | 0.10       | 1.04       |
| Cotinine                               | mcg/collection | 0.11       | 1.06       | 0.10       | 1.06       | 0.11       | 1.06       | 0.11       | 1.05       | 0.22       | 1.05       |
| Myosmine                               | mcg/collection | 0.11       | 1.05       | 0.10       | 1.05       | 0.11       | 1.05       | 0.11       | 1.06       | 0.11       | 1.06       |
| Nicotine N Oxide                       | mcg/collection | 0.11       | 1.05       | 0.10       | 1.05       | 0.11       | 1.05       | 0.11       | 1.04       | 0.26       | 1.04       |
| Nornicotine                            | mcg/collection | 0.11       | 1.05       | 0.10       | 1.05       | 0.11       | 1.05       | 0.11       | 1.04       | 0.27       | 1.04       |
| Anabasine                              | mcg/collection | 0.11       | 1.06       | 0.12       | 1.06       | 0.11       | 1.06       | 0.11       | 1.06       | 0.15       | 1.06       |
| Anatabine                              | mcg/collection | 0.11       | 1.06       | 0.11       | 1.06       | 0.11       | 1.06       | 0.11       | 1.06       | 0.12       | 1.06       |
| NNK                                    | mcg/collection | 0.001      | 0.003      | 0.001      | 0.003      | NT         | NT         | NT         | NT         | NT         | NT         |
| NNN                                    | mcg/collection | 0.001      | 0.003      | 0.001      | 0.003      | NT         | NT         | NT         | NT         | NT         | NT         |

| Metals            |                | LOD    | LOQ    |
|-------------------|----------------|--------|--------|--------|--------|--------|--------|--------|--------|--------|--------|
| Arsenic           | ng/collection  | 10.00  | 50.00  | 10.00  | 50.00  | 10.00  | 50.00  | 10.00  | 50.00  | 10.00  | 50.00  |
| Beryllium         | ng/collection  | 2.20   | 20.00  | 2.20   | 20.00  | 2.20   | 20.00  | 2.20   | 20.00  | 2.20   | 20.00  |
| Cadmium           | ng/collection  | 1.00   | 5.00   | 1.00   | 5.00   | 1.00   | 5.00   | 1.00   | 5.00   | 1.00   | 5.00   |
| Chromium          | ng/collection  | 10.00  | 50.00  | 10.00  | 50.00  | 10.00  | 50.00  | 10.00  | 50.00  | 10.00  | 50.00  |
| Cobalt            | ng/collection  | 0.50   | 5.00   | 0.50   | 5.00   | 0.50   | 5.00   | 0.50   | 5.00   | 0.50   | 5.00   |
| Copper            | ng/collection  | 25.00  | 75.00  | 25.00  | 75.00  | 25.00  | 75.00  | 25.00  | 75.00  | 25.00  | 75.00  |
| Gold              | ng/collection  | 170.00 | 200.00 | 170.00 | 200.20 | 170.00 | 200.00 | 170.00 | 200.00 | 170.00 | 200.00 |
| Iron              | ng/collection  | 100.00 | 200.00 | 100.00 | 200.00 | 100.00 | 200.00 | 100.00 | 200.00 | 100.00 | 200.00 |
| Lead              | ng/collection  | 2.50   | 10.00  | 2.50   | 10.00  | 2.50   | 10.00  | 2.50   | 10.00  | 2.50   | 10.00  |
| Nickel            | ng/collection  | 5.00   | 10.00  | 5.00   | 10.00  | 5.00   | 10.00  | 5.00   | 10.00  | 5.00   | 10.00  |
| Selenium          | ng/collection  | 3.90   | 20.00  | 3.90   | 20.00  | 3.90   | 20.00  | 3.90   | 20.00  | 3.90   | 20.00  |
| Silver            | ng/collection  | 1.00   | 5.00   | 1.00   | 5.00   | 1.00   | 5.00   | 1.00   | 5.00   | 1.00   | 5.00   |
| Tin               | ng/collection  | 10.00  | 50.00  | 10.00  | 50.00  | 10.00  | 50.00  | 10.00  | 50.00  | 10.00  | 50.00  |
| Zinc              | ng/collection  | 150.00 | 350.00 | 150.00 | 350.00 | 150.00 | 350.00 | 150.00 | 350.00 | 150.00 | 350.00 |
| Organic Acids     |                | LOD    | LOQ    |
| Benzoic Acid      | mg/collection  | 0.06   | 0.71   | 0.06   | 0.35   | 0.06   | 0.35   | 0.05   | 0.50   | 0.07   | 0.70   |
| Propionic Acid    | mcg/collection | 61.89  | 352.71 | 61.89  | 354.83 | 61.89  | 354.83 | 50.44  | 506.90 | 70.61  | 706.10 |
| VOCs              |                | LOD    | LOQ    |
| 1,3-butadiene     | mcg/collection | 0.05   | 0.20   | 0.05   | 0.20   | NT     | NT     | NT     | NT     | NT     | NT     |
| Acrylonitrile     | mcg/collection | 0.04   | 0.21   | 0.04   | 0.21   | NT     | NT     | NT     | NT     | NT     | NT     |
| Benzene           | mcg/collection | 0.06   | 0.31   | 0.06   | 0.31   | NT     | NT     | NT     | NT     | NT     | NT     |
| Isoprene          | mcg/collection | 0.08   | 0.27   | 0.08   | 0.27   | NT     | NT     | NT     | NT     | NT     | NT     |
| Propylene Oxide   | mcg/collection | 0.15   | 0.88   | 0.15   | 0.87   | NT     | NT     | NT     | NT     | NT     | NT     |
| Toluene           | mcg/collection | 0.09   | 0.35   | 0.09   | 0.35   | NT     | NT     | NT     | NT     | NT     | NT     |
| Esters & Alcohols |                | LOD    | LOQ    |
| 1-Butanol         | mcg/collection | 1.91   | 19.47  | 1.91   | 19.66  | NT     | NT     | NT     | NT     | NT     | NT     |
| Benzyl Acetate    | mcg/collection | 2.52   | 25.22  | 2.52   | 25.65  | NT     | NT     | NT     | NT     | NT     | NT     |
| Ethyl Acetate     | mcg/collection | 2.00   | 20.48  | 2.00   | 20.38  | NT     | NT     | NT     | NT     | NT     | NT     |

|                           |                |      |       |      |       |    |    |    |    |    |    |
|---------------------------|----------------|------|-------|------|-------|----|----|----|----|----|----|
| <b>Ethyl Acetoacetate</b> | mcg/collection | 3.90 | 27.83 | 3.90 | 25.01 | NT | NT | NT | NT | NT | NT |
| <b>Isoamyl Acetate</b>    | mcg/collection | 2.03 | 20.78 | 2.03 | 21.02 | NT | NT | NT | NT | NT | NT |
| <b>Isobutyl Acetate</b>   | mcg/collection | 2.02 | 20.59 | 2.02 | 20.78 | NT | NT | NT | NT | NT | NT |
| <b>Methyl Acetate</b>     | mcg/collection | 2.09 | 21.60 | 2.09 | 21.98 | NT | NT | NT | NT | NT | NT |

### 1.11 Summer Menthol 18 mg/mL Non-Intense Per Collection Limit of Detection and Quantification Values

| Parameter/<br>Constituent              | Units          | T0         |            | T3         |            | T6         |            | T9         |            | T12        |            |
|----------------------------------------|----------------|------------|------------|------------|------------|------------|------------|------------|------------|------------|------------|
| <b>pH</b>                              | NA             | NA         | NA         | NA         | NA         | NA         | NA         | NA         | NA         | NA         | NA         |
| <b>Primary Constituents</b>            |                | <b>LOD</b> | <b>LOQ</b> |
| <b>Nicotine</b>                        | mg/collection  | 0.15       | 1.50       | 0.15       | 1.50       | 0.05       | 0.45       | 0.05       | 0.45       | 0.23       | 2.25       |
| <b>Glycerol</b>                        | mg/collection  | 1.25       | 12.54      | 1.25       | 12.63      | 0.70       | 7.01       | 1.66       | 16.62      | 1.88       | 18.96      |
| <b>Propylene Glycol</b>                | mg/collection  | 0.40       | 4.03       | 0.40       | 4.01       | 0.24       | 2.41       | 0.60       | 6.02       | 0.60       | 6.02       |
| <b>Water</b>                           | mg/collection  | 4.63       | 9.97       | 4.63       | 9.96       | 1.39       | 3.08       | 1.39       | 3.01       | 6.95       | 15.10      |
| <b>Menthol</b>                         | mg/collection  | 0.05       | 0.48       | 0.05       | 0.48       | 0.01       | 0.14       | 0.01       | 0.14       | 0.07       | 0.74       |
| <b>Diethylene Glycol</b>               | mg/collection  | 0.04       | 0.24       | 0.04       | 0.28       | 0.01       | 0.08       | 0.01       | 0.08       | 0.07       | 0.41       |
| <b>Ethylene Glycol</b>                 | mg/collection  | 0.03       | 0.25       | 0.03       | 0.25       | 0.01       | 0.07       | 0.01       | 0.08       | 0.05       | 0.46       |
| <b>Carbonyls &amp; Glycidol</b>        |                | <b>LOD</b> | <b>LOQ</b> |
| <b>Acetaldehyde</b>                    | mcg/collection | 0.20       | 1.13       | 0.20       | 1.13       | 0.20       | 1.13       | 0.20       | 1.13       | 0.19       | 1.13       |
| <b>Acrolein</b>                        | mcg/collection | 0.15       | 1.13       | 0.15       | 1.13       | 0.15       | 1.13       | 0.15       | 1.13       | 0.14       | 1.13       |
| <b>Diacetyl</b>                        | mcg/collection | 0.11       | 1.15       | 0.11       | 1.12       | 0.11       | 1.12       | 0.11       | 1.13       | 0.16       | 1.13       |
| <b>Formaldehyde</b>                    | mcg/collection | 0.38       | 1.13       | 0.38       | 1.13       | 0.38       | 1.13       | 0.38       | 1.13       | 0.15       | 1.13       |
| <b>Glycidol</b>                        | mcg/collection | 0.003      | 0.03       | 0.003      | 0.03       | 0.003      | 0.03       | 0.003      | 0.03       | 0.005      | 0.05       |
| <b>Acetyl Propionyl</b>                | mcg/collection | 0.11       | 1.13       | 0.11       | 1.14       | 0.11       | 1.14       | 0.11       | 1.14       | 0.15       | 1.14       |
| <b>Butyraldehyde</b>                   | mcg/collection | 0.11       | 1.13       | 0.11       | 1.11       | 0.11       | 1.13       | 0.11       | 1.13       | 0.12       | 1.13       |
| <b>Crotonaldehyde</b>                  | mcg/collection | 0.18       | 1.11       | 0.18       | 1.13       | 0.18       | 1.13       | 0.18       | 1.13       | 0.15       | 1.13       |
| <b>Furfural</b>                        | mcg/collection | 0.19       | 1.13       | 0.19       | 1.13       | 0.19       | 1.13       | 0.19       | 1.13       | 0.21       | 1.13       |
| <b>Nicotine Degradants &amp; TSNAs</b> |                | <b>LOD</b> | <b>LOQ</b> |



|                         |                |            |            |            |            |            |            |            |            |            |            |
|-------------------------|----------------|------------|------------|------------|------------|------------|------------|------------|------------|------------|------------|
| <b>β-Nicotyrine</b>     | mcg/collection | 0.09       | 0.90       | 0.09       | 0.90       | 0.09       | 0.90       | 0.09       | 0.89       | 0.09       | 0.89       |
| <b>Cotinine</b>         | mcg/collection | 0.09       | 0.90       | 0.09       | 0.90       | 0.09       | 0.90       | 0.09       | 0.90       | 0.19       | 0.90       |
| <b>Myosmine</b>         | mcg/collection | 0.09       | 0.90       | 0.09       | 0.90       | 0.09       | 0.90       | 0.09       | 0.91       | 0.09       | 0.91       |
| <b>Nicotine N Oxide</b> | mcg/collection | 0.09       | 0.90       | 0.09       | 0.90       | 0.09       | 0.90       | 0.09       | 0.89       | 0.22       | 0.89       |
| <b>Nornicotine</b>      | mcg/collection | 0.09       | 0.90       | 0.09       | 0.90       | 0.09       | 0.90       | 0.09       | 0.90       | 0.23       | 0.90       |
| <b>Anabasine</b>        | mcg/collection | 0.09       | 0.91       | 0.10       | 0.91       | 0.09       | 0.91       | 0.09       | 0.91       | 0.13       | 0.91       |
| <b>Anatabine</b>        | mcg/collection | 0.09       | 0.90       | 0.09       | 0.90       | 0.09       | 0.90       | 0.09       | 0.91       | 0.11       | 0.91       |
| <b>NNK</b>              | mcg/collection | 0.001      | 0.003      | 0.001      | 0.003      | NT         | NT         | NT         | NT         | NT         | NT         |
| <b>NNN</b>              | mcg/collection | 0.001      | 0.003      | 0.001      | 0.003      | NT         | NT         | NT         | NT         | NT         | NT         |
| <b>Metals</b>           |                | <b>LOD</b> | <b>LOQ</b> |
| <b>Arsenic</b>          | ng/collection  | 10.00      | 50.00      | 10.00      | 50.00      | 10.00      | 50.00      | 10.00      | 50.00      | 10.00      | 50.00      |
| <b>Beryllium</b>        | ng/collection  | 2.20       | 20.00      | 2.20       | 20.00      | 2.20       | 20.00      | 2.20       | 20.00      | 2.20       | 20.00      |
| <b>Cadmium</b>          | ng/collection  | 1.00       | 5.00       | 1.00       | 5.00       | 1.00       | 5.00       | 1.00       | 5.00       | 1.00       | 5.00       |
| <b>Chromium</b>         | ng/collection  | 10.00      | 50.00      | 10.00      | 50.00      | 10.00      | 50.00      | 10.00      | 50.00      | 10.00      | 50.00      |
| <b>Cobalt</b>           | ng/collection  | 0.50       | 5.00       | 0.50       | 5.00       | 0.50       | 5.00       | 0.50       | 5.00       | 0.50       | 5.00       |
| <b>Copper</b>           | ng/collection  | 25.00      | 75.00      | 25.00      | 75.00      | 25.00      | 75.00      | 25.00      | 75.00      | 25.00      | 75.00      |
| <b>Gold</b>             | ng/collection  | 170.00     | 200.00     | 170.00     | 200.20     | 170.00     | 200.00     | 170.00     | 200.00     | 170.00     | 200.00     |
| <b>Iron</b>             | ng/collection  | 100.00     | 200.00     | 100.00     | 200.00     | 100.00     | 200.00     | 100.00     | 200.00     | 100.00     | 200.00     |
| <b>Lead</b>             | ng/collection  | 2.50       | 10.00      | 2.50       | 10.00      | 2.50       | 10.00      | 2.50       | 10.00      | 2.50       | 10.00      |
| <b>Nickel</b>           | ng/collection  | 5.00       | 10.00      | 5.00       | 10.00      | 5.00       | 10.00      | 5.00       | 10.00      | 5.00       | 10.00      |
| <b>Selenium</b>         | ng/collection  | 3.90       | 20.00      | 3.90       | 20.00      | 3.90       | 20.00      | 3.90       | 20.00      | 3.90       | 20.00      |
| <b>Silver</b>           | ng/collection  | 1.00       | 5.00       | 1.00       | 5.00       | 1.00       | 5.00       | 1.00       | 5.00       | 1.00       | 5.00       |
| <b>Tin</b>              | ng/collection  | 10.00      | 50.00      | 10.00      | 50.00      | 10.00      | 50.00      | 10.00      | 50.00      | 10.00      | 50.00      |
| <b>Zinc</b>             | ng/collection  | 150.00     | 350.00     | 150.00     | 350.00     | 150.00     | 350.00     | 150.00     | 350.00     | 150.00     | 350.00     |
| <b>Organic Acids</b>    |                | <b>LOD</b> | <b>LOQ</b> |
| <b>Benzoic Acid</b>     | mg/collection  | 0.04       | 0.35       | 0.06       | 0.35       | 0.04       | 0.35       | 0.07       | 0.40       | 0.07       | 0.70       |
| <b>Propionic Acid</b>   | mcg/collection | 46.17      | 352.71     | 61.89      | 354.83     | 35.27      | 354.83     | 40.31      | 405.52     | 70.61      | 706.10     |
| <b>VOCs</b>             |                | <b>LOD</b> | <b>LOQ</b> |
| <b>1,3-butadiene</b>    | mcg/collection | 0.05       | 0.20       | 0.07       | 0.20       | NT         | NT         | NT         | NT         | NT         | NT         |

|                              |                |            |            |            |            |            |            |            |            |            |            |
|------------------------------|----------------|------------|------------|------------|------------|------------|------------|------------|------------|------------|------------|
| <b>Acrylonitrile</b>         | mcg/collection | 0.04       | 0.21       | 0.02       | 0.20       | NT         | NT         | NT         | NT         | NT         | NT         |
| <b>Benzene</b>               | mcg/collection | 0.06       | 0.31       | 0.06       | 0.31       | NT         | NT         | NT         | NT         | NT         | NT         |
| <b>Isoprene</b>              | mcg/collection | 0.08       | 0.27       | 0.06       | 0.27       | NT         | NT         | NT         | NT         | NT         | NT         |
| <b>Propylene Oxide</b>       | mcg/collection | 0.15       | 0.87       | 0.23       | 0.87       | NT         | NT         | NT         | NT         | NT         | NT         |
| <b>Toluene</b>               | mcg/collection | 0.09       | 0.35       | 0.04       | 0.35       | NT         | NT         | NT         | NT         | NT         | NT         |
| <b>Esters &amp; Alcohols</b> |                | <b>LOD</b> | <b>LOQ</b> |
| <b>1-Butanol</b>             | mcg/collection | 1.91       | 19.47      | 1.91       | 19.71      | NT         | NT         | NT         | NT         | NT         | NT         |
| <b>Benzyl Acetate</b>        | mcg/collection | 2.52       | 25.22      | 2.52       | 25.17      | NT         | NT         | NT         | NT         | NT         | NT         |
| <b>Ethyl Acetate</b>         | mcg/collection | 2.00       | 20.48      | 2.00       | 20.24      | NT         | NT         | NT         | NT         | NT         | NT         |
| <b>Ethyl Acetoacetate</b>    | mcg/collection | 3.90       | 27.83      | 3.90       | 24.81      | NT         | NT         | NT         | NT         | NT         | NT         |
| <b>Isoamyl Acetate</b>       | mcg/collection | 2.03       | 20.78      | 2.03       | 20.83      | NT         | NT         | NT         | NT         | NT         | NT         |
| <b>Isobutyl Acetate</b>      | mcg/collection | 2.02       | 20.59      | 2.02       | 20.50      | NT         | NT         | NT         | NT         | NT         | NT         |
| <b>Methyl Acetate</b>        | mcg/collection | 2.09       | 21.60      | 2.09       | 21.07      | NT         | NT         | NT         | NT         | NT         | NT         |

### 1.12 Summer Menthol 18 mg/mL Intense Per Collection Limit of Detection and Quantification Values

| Parameter/<br>Constituent       | Units          | T0         |            | T3         |            | T6         |            | T9         |            | T12        |            |
|---------------------------------|----------------|------------|------------|------------|------------|------------|------------|------------|------------|------------|------------|
| <b>pH</b>                       | NA             | NA         | NA         | NA         | NA         | NA         | NA         | NA         | NA         | NA         | NA         |
| <b>Primary Constituents</b>     |                | <b>LOD</b> | <b>LOQ</b> |
| <b>Nicotine</b>                 | mg/collection  | 0.15       | 1.50       | 0.15       | 1.50       | 0.05       | 0.45       | 0.05       | 0.45       | 0.23       | 2.25       |
| <b>Glycerol</b>                 | mg/collection  | 1.25       | 12.54      | 1.25       | 12.63      | 0.59       | 5.93       | 1.66       | 16.62      | 1.88       | 18.96      |
| <b>Propylene Glycol</b>         | mg/collection  | 0.40       | 4.03       | 0.40       | 4.01       | 0.36       | 3.62       | 0.60       | 6.02       | 0.60       | 6.02       |
| <b>Water</b>                    | mg/collection  | 4.63       | 9.97       | 4.63       | 9.96       | 1.39       | 3.08       | 1.39       | 3.01       | 6.95       | 15.10      |
| <b>Menthol</b>                  | mg/collection  | 0.05       | 0.48       | 0.05       | 0.48       | 0.01       | 0.14       | 0.01       | 0.14       | 0.07       | 0.74       |
| <b>Diethylene Glycol</b>        | mg/collection  | 0.04       | 0.24       | 0.04       | 0.26       | 0.01       | 0.08       | 0.01       | 0.08       | 0.07       | 0.41       |
| <b>Ethylene Glycol</b>          | mg/collection  | 0.03       | 0.25       | 0.03       | 0.27       | 0.01       | 0.07       | 0.01       | 0.08       | 0.05       | 0.46       |
| <b>Carbonyls &amp; Glycidol</b> |                | <b>LOD</b> | <b>LOQ</b> |
| <b>Acetaldehyde</b>             | mcg/collection | 0.24       | 1.32       | 0.24       | 1.31       | 0.20       | 1.13       | 0.24       | 1.32       | 0.22       | 1.32       |

|                                        |                |            |            |            |            |            |            |            |            |            |            |
|----------------------------------------|----------------|------------|------------|------------|------------|------------|------------|------------|------------|------------|------------|
| <b>Acrolein</b>                        | mcg/collection | 0.18       | 1.31       | 0.18       | 1.32       | 0.15       | 1.13       | 0.18       | 1.32       | 0.16       | 1.32       |
| <b>Diacetyl</b>                        | mcg/collection | 0.13       | 1.34       | 0.13       | 1.30       | 0.11       | 1.12       | 0.13       | 1.32       | 0.18       | 1.32       |
| <b>Formaldehyde</b>                    | mcg/collection | 0.44       | 1.32       | 0.44       | 1.31       | 0.38       | 1.13       | 0.44       | 1.32       | 0.17       | 1.31       |
| <b>Glycidol</b>                        | mcg/collection | 0.004      | 0.03       | 0.003      | 0.03       | 0.003      | 0.03       | 0.003      | 0.03       | 0.005      | 0.05       |
| <b>Acetyl Propionyl</b>                | mcg/collection | 0.13       | 1.32       | 0.13       | 1.33       | 0.11       | 1.14       | 0.13       | 1.33       | 0.18       | 1.33       |
| <b>Butyraldehyde</b>                   | mcg/collection | 0.13       | 1.32       | 0.13       | 1.30       | 0.11       | 1.13       | 0.13       | 1.32       | 0.14       | 1.32       |
| <b>Crotonaldehyde</b>                  | mcg/collection | 0.21       | 1.29       | 0.21       | 1.32       | 0.18       | 1.13       | 0.21       | 1.32       | 0.18       | 1.31       |
| <b>Furfural</b>                        | mcg/collection | 0.22       | 1.32       | 0.22       | 1.32       | 0.19       | 1.13       | 0.22       | 1.32       | 0.25       | 1.32       |
| <b>Nicotine Degradants &amp; TSNAs</b> |                | <b>LOD</b> | <b>LOQ</b> |
| <b>β-Nicotyrine</b>                    | mcg/collection | 0.11       | 1.06       | 0.10       | 1.06       | 0.11       | 1.06       | 0.11       | 1.04       | 0.10       | 1.04       |
| <b>Cotinine</b>                        | mcg/collection | 0.11       | 1.06       | 0.10       | 1.06       | 0.11       | 1.06       | 0.11       | 1.05       | 0.22       | 1.05       |
| <b>Myosmine</b>                        | mcg/collection | 0.11       | 1.05       | 0.10       | 1.05       | 0.11       | 1.05       | 0.11       | 1.06       | 0.11       | 1.06       |
| <b>Nicotine N Oxide</b>                | mcg/collection | 0.11       | 1.05       | 0.10       | 1.05       | 0.11       | 1.05       | 0.11       | 1.04       | 0.26       | 1.04       |
| <b>Nornicotine</b>                     | mcg/collection | 0.11       | 1.05       | 0.10       | 1.05       | 0.11       | 1.05       | 0.11       | 1.04       | 0.27       | 1.04       |
| <b>Anabasine</b>                       | mcg/collection | 0.11       | 1.06       | 0.12       | 1.06       | 0.11       | 1.06       | 0.11       | 1.06       | 0.15       | 1.06       |
| <b>Anatabine</b>                       | mcg/collection | 0.11       | 1.06       | 0.11       | 1.06       | 0.11       | 1.06       | 0.11       | 1.06       | 0.12       | 1.06       |
| <b>NNK</b>                             | mcg/collection | 0.001      | 0.003      | 0.001      | 0.003      | NT         | NT         | NT         | NT         | NT         | NT         |
| <b>NNN</b>                             | mcg/collection | 0.001      | 0.003      | 0.001      | 0.003      | NT         | NT         | NT         | NT         | NT         | NT         |
| <b>Metals</b>                          |                | <b>LOD</b> | <b>LOQ</b> |
| <b>Arsenic</b>                         | ng/collection  | 10.00      | 50.00      | 10.00      | 50.00      | 10.00      | 50.00      | 10.00      | 50.00      | 10.00      | 50.00      |
| <b>Beryllium</b>                       | ng/collection  | 2.20       | 20.00      | 2.20       | 20.00      | 2.20       | 20.00      | 2.20       | 20.00      | 2.20       | 20.00      |
| <b>Cadmium</b>                         | ng/collection  | 1.00       | 5.00       | 1.00       | 5.00       | 1.00       | 5.00       | 1.00       | 5.00       | 1.00       | 5.00       |
| <b>Chromium</b>                        | ng/collection  | 10.00      | 50.00      | 10.00      | 50.00      | 10.00      | 50.00      | 10.00      | 50.00      | 10.00      | 50.00      |
| <b>Cobalt</b>                          | ng/collection  | 0.50       | 5.00       | 0.50       | 5.00       | 0.50       | 5.00       | 0.50       | 5.00       | 0.50       | 5.00       |
| <b>Copper</b>                          | ng/collection  | 25.00      | 75.00      | 25.00      | 75.00      | 25.00      | 75.00      | 25.00      | 75.00      | 25.00      | 75.00      |
| <b>Gold</b>                            | ng/collection  | 170.00     | 200.00     | 170.00     | 200.20     | 170.00     | 200.00     | 170.00     | 200.00     | 170.00     | 200.00     |
| <b>Iron</b>                            | ng/collection  | 100.00     | 200.00     | 100.00     | 200.00     | 100.00     | 200.00     | 100.00     | 200.00     | 100.00     | 200.00     |
| <b>Lead</b>                            | ng/collection  | 2.50       | 10.00      | 2.50       | 10.00      | 2.50       | 10.00      | 2.50       | 10.00      | 2.50       | 10.00      |
| <b>Nickel</b>                          | ng/collection  | 5.00       | 10.00      | 5.00       | 10.00      | 5.00       | 10.00      | 5.00       | 10.00      | 5.00       | 10.00      |

## Supplementary Material

|                              |                |            |            |            |            |            |            |            |            |            |            |
|------------------------------|----------------|------------|------------|------------|------------|------------|------------|------------|------------|------------|------------|
| <b>Selenium</b>              | ng/collection  | 3.90       | 20.00      | 3.90       | 20.00      | 3.90       | 20.00      | 3.90       | 20.00      | 3.90       | 20.00      |
| <b>Silver</b>                | ng/collection  | 1.00       | 5.00       | 1.00       | 5.00       | 1.00       | 5.00       | 1.00       | 5.00       | 1.00       | 5.00       |
| <b>Tin</b>                   | ng/collection  | 10.00      | 50.00      | 10.00      | 50.00      | 10.00      | 50.00      | 10.00      | 50.00      | 10.00      | 50.00      |
| <b>Zinc</b>                  | ng/collection  | 150.00     | 350.00     | 150.00     | 350.00     | 150.00     | 350.00     | 150.00     | 350.00     | 150.00     | 350.00     |
| <b>Organic Acids</b>         |                | <b>LOD</b> | <b>LOQ</b> |
| <b>Benzoic Acid</b>          | mg/collection  | 0.06       | 0.71       | 0.06       | 0.35       | 0.06       | 0.35       | 0.06       | 0.55       | 0.07       | 0.70       |
| <b>Propionic Acid</b>        | mcg/collection | 61.89      | 352.71     | 61.89      | 354.83     | 61.89      | 354.83     | 55.48      | 557.58     | 70.61      | 706.10     |
| <b>VOCs</b>                  |                | <b>LOD</b> | <b>LOQ</b> |
| <b>1,3-butadiene</b>         | mcg/collection | 0.05       | 0.20       | 0.05       | 0.20       | NT         | NT         | NT         | NT         | NT         | NT         |
| <b>Acrylonitrile</b>         | mcg/collection | 0.04       | 0.21       | 0.04       | 0.21       | NT         | NT         | NT         | NT         | NT         | NT         |
| <b>Benzene</b>               | mcg/collection | 0.06       | 0.31       | 0.06       | 0.31       | NT         | NT         | NT         | NT         | NT         | NT         |
| <b>Isoprene</b>              | mcg/collection | 0.08       | 0.27       | 0.08       | 0.27       | NT         | NT         | NT         | NT         | NT         | NT         |
| <b>Propylene Oxide</b>       | mcg/collection | 0.15       | 0.88       | 0.15       | 0.87       | NT         | NT         | NT         | NT         | NT         | NT         |
| <b>Toluene</b>               | mcg/collection | 0.09       | 0.35       | 0.09       | 0.35       | NT         | NT         | NT         | NT         | NT         | NT         |
| <b>Esters &amp; Alcohols</b> |                | <b>LOD</b> | <b>LOQ</b> |
| <b>1-Butanol</b>             | mcg/collection | 1.91       | 19.47      | 1.91       | 19.66      | NT         | NT         | NT         | NT         | NT         | NT         |
| <b>Benzyl Acetate</b>        | mcg/collection | 2.52       | 25.22      | 2.52       | 25.65      | NT         | NT         | NT         | NT         | NT         | NT         |
| <b>Ethyl Acetate</b>         | mcg/collection | 2.00       | 20.48      | 2.00       | 20.38      | NT         | NT         | NT         | NT         | NT         | NT         |
| <b>Ethyl Acetoacetate</b>    | mcg/collection | 3.90       | 27.83      | 3.90       | 25.01      | NT         | NT         | NT         | NT         | NT         | NT         |
| <b>Isoamyl Acetate</b>       | mcg/collection | 2.03       | 20.78      | 2.03       | 21.02      | NT         | NT         | NT         | NT         | NT         | NT         |
| <b>Isobutyl Acetate</b>      | mcg/collection | 2.02       | 20.59      | 2.02       | 20.78      | NT         | NT         | NT         | NT         | NT         | NT         |
| <b>Methyl Acetate</b>        | mcg/collection | 2.09       | 21.60      | 2.09       | 21.98      | NT         | NT         | NT         | NT         | NT         | NT         |
