# Supplementary material for: A Practical Framework for Novel Electronic Nicotine Delivery System Evaluation: Chemical and Toxicological Characterization of JUUL2 Aerosol and Comparison with Reference Cigarettes
Source: MDPI journal article supplement (doi:10.3390/toxics12010041), 2024-01-04
Supplement: s1 [file s1]

## Supplementary Materials File S4

## 1 Non-Intense and Intense Nicotine Normalized Analytical Stability Results

### 1.1 Virginia Tobacco 18 mg/mL Non-Intense Nicotine Normalized Analytical Stability Results

| Parameter/<br>Constituent   | Units          | T0         | T3         | T6         | T9         | T12        | Max        |
|-----------------------------|----------------|------------|------------|------------|------------|------------|------------|
| # of puffs                  | NA             | 150        | 134        | 141        | 132        | 114        | 150        |
| pH                          | NA             | 6.01       | 6.19       | 6.14       | 5.90       | 5.93       | 6.19       |
| Primary Constituents        |                |            |            |            |            |            |            |
| Nicotine                    | mg/mg nicotine | 1.00E+00   | 1.00E+00   | 1.00E+00   | 1.00E+00   | 1.00E+00   | 1.00E+00   |
| Glycerol                    | mg/mg nicotine | 3.82E+01   | 4.19E+01   | 4.03E+01   | 4.21E+01   | 4.35E+01   | 4.35E+01   |
| Propylene Glycol            | mg/mg nicotine | 2.39E+01   | 2.50E+01   | 2.45E+01   | 2.44E+01   | 2.48E+01   | 2.50E+01   |
| Water                       | mg/mg nicotine | 4.52E+00   | 5.63E+00   | 5.68E+00   | 4.67E+00   | 5.21E+00   | 5.68E+00   |
| Menthol                     | mg/mg nicotine | ~ 4.30E-03 | ~ 5.26E-02 | ~ 4.57E-03 | ~ 4.29E-03 | ~ 5.69E-02 | ~ 5.69E-02 |
| Diethylene Glycol           | mg/mg nicotine | ~ 4.57E-03 | ~ 4.90E-03 | ~ 4.69E-03 | ~ 4.40E-03 | ~ 5.33E-03 | ~ 5.33E-03 |
| Ethylene Glycol             | mg/mg nicotine | ~ 4.86E-03 | ~ 5.24E-03 | ~ 5.01E-03 | ~ 4.70E-03 | ~ 5.71E-03 | ~ 5.71E-03 |
| Carbonyls & Glycidol        |                |            |            |            |            |            |            |
| Acetaldehyde                | mg/mg nicotine | 1.93E-04   | 1.68E-04   | 1.82E-04   | 2.16E-04   | 2.74E-04   | 2.74E-04   |
| Acrolein                    | mg/mg nicotine | 8.82E-05   | 7.22E-05   | ~ 3.64E-05 | ~ 3.42E-05 | 1.78E-04   | 1.78E-04   |
| Diacetyl                    | mg/mg nicotine | ~ 3.45E-05 | ~ 3.78E-05 | ~ 3.26E-06 | ~ 3.06E-06 | ~ 3.90E-05 | ~ 3.90E-05 |
| Formaldehyde                | mg/mg nicotine | 8.42E-04   | 9.52E-04   | 8.69E-04   | 1.04E-03   | 1.13E-03   | 1.13E-03   |
| Glycidol                    | mg/mg nicotine | 2.24E-04   | 1.96E-04   | 2.39E-04   | 2.35E-04   | 1.96E-04   | 2.39E-04   |
| Acetyl Propionyl            | mg/mg nicotine | ~ 3.01E-06 | ~ 3.29E-06 | ~ 3.21E-06 | ~ 3.02E-06 | ~ 3.58E-06 | ~ 3.58E-06 |
| Butyraldehyde               | mg/mg nicotine | ~ 3.33E-06 | ~ 3.64E-06 | ~ 3.21E-06 | ~ 3.01E-06 | ~ 3.58E-06 | ~ 3.64E-06 |
| Crotonaldehyde              | mg/mg nicotine | ~ 3.05E-06 | ~ 3.33E-06 | ~ 5.15E-06 | ~ 4.84E-06 | ~ 5.74E-06 | ~ 5.74E-06 |
| Furfural                    | mg/mg nicotine | ~ 4.22E-06 | ~ 4.61E-06 | ~ 5.27E-06 | ~ 4.95E-06 | ~ 5.88E-06 | ~ 5.88E-06 |
| Nicotine Degradants & TSNAs |                |            |            |            |            |            |            |

## Supplementary Material

|                         |                |            |            |            |            |            |            |
|-------------------------|----------------|------------|------------|------------|------------|------------|------------|
| <b>β-Nicotyrine</b>     | mg/mg nicotine | 8.44E-05   | 6.92E-05   | 7.59E-05   | 1.35E-04   | 1.11E-04   | 1.35E-04   |
| <b>Cotinine</b>         | mg/mg nicotine | 1.87E-03   | 2.41E-03   | 1.80E-03   | 2.09E-03   | 2.25E-03   | 2.41E-03   |
| <b>Myosmine</b>         | mg/mg nicotine | 1.72E-03   | 1.99E-03   | 1.59E-03   | 1.61E-03   | 1.65E-03   | 1.99E-03   |
| <b>Nicotine N Oxide</b> | mg/mg nicotine | ~ 3.32E-05 | ~ 3.62E-05 | 7.73E-05   | ~ 2.65E-05 | ~ 3.14E-05 | 7.73E-05   |
| <b>Nornicotine</b>      | mg/mg nicotine | 3.32E-04   | 5.48E-04   | 5.60E-04   | 6.62E-04   | 7.91E-04   | 7.91E-04   |
| <b>Anabasine</b>        | mg/mg nicotine | ~ 2.50E-06 | ~ 2.73E-06 | ~ 2.58E-06 | ~ 2.43E-06 | ~ 2.88E-06 | ~ 2.88E-06 |
| <b>Anatabine</b>        | mg/mg nicotine | ~ 2.49E-06 | ~ 2.72E-06 | ~ 2.57E-06 | ~ 2.66E-05 | ~ 2.87E-06 | ~ 2.66E-05 |
| <b>NNK</b>              | mg/mg nicotine | ~ 7.49E-07 | NT         | NT         | NT         | NT         | ~ 7.49E-07 |
| <b>NNN</b>              | mg/mg nicotine | ~ 8.99E-08 | NT         | NT         | NT         | NT         | ~ 8.99E-08 |
| <b>Metals</b>           |                |            |            |            |            |            |            |
| <b>Arsenic</b>          | mg/mg nicotine | ~ 2.72E-07 | ~ 1.78E-06 | ~ 2.84E-07 | ~ 1.60E-06 | ~ 3.17E-07 | ~ 1.78E-06 |
| <b>Beryllium</b>        | mg/mg nicotine | ~ 5.99E-08 | ~ 6.54E-08 | ~ 6.25E-08 | ~ 5.87E-08 | ~ 6.97E-08 | ~ 6.97E-08 |
| <b>Cadmium</b>          | mg/mg nicotine | ~ 2.72E-08 | ~ 2.97E-08 | ~ 2.84E-08 | ~ 2.67E-08 | ~ 3.17E-08 | ~ 3.17E-08 |
| <b>Chromium</b>         | mg/mg nicotine | ~ 1.63E-06 | ~ 2.97E-07 | ~ 2.84E-07 | ~ 2.67E-07 | ~ 1.90E-06 | ~ 1.90E-06 |
| <b>Cobalt</b>           | mg/mg nicotine | ~ 1.36E-08 | ~ 1.49E-08 | ~ 1.42E-08 | ~ 1.33E-08 | ~ 1.58E-08 | ~ 1.58E-08 |
| <b>Copper</b>           | mg/mg nicotine | ~ 2.72E-06 | ~ 7.43E-07 | ~ 7.11E-07 | ~ 6.67E-07 | ~ 7.92E-07 | ~ 2.72E-06 |
| <b>Gold</b>             | mg/mg nicotine | ~ 4.63E-06 | NT         | NT         | NT         | NT         | ~ 4.63E-06 |
| <b>Iron</b>             | mg/mg nicotine | ~ 8.17E-06 | ~ 2.97E-06 | ~ 2.84E-06 | ~ 2.67E-06 | ~ 3.17E-06 | ~ 8.17E-06 |
| <b>Lead</b>             | mg/mg nicotine | ~ 6.81E-08 | ~ 7.43E-08 | ~ 7.11E-08 | ~ 6.67E-08 | ~ 7.92E-08 | ~ 7.92E-08 |
| <b>Nickel</b>           | mg/mg nicotine | ~ 1.36E-07 | ~ 1.49E-07 | ~ 1.42E-07 | ~ 1.33E-07 | ~ 1.58E-07 | ~ 1.58E-07 |
| <b>Selenium</b>         | mg/mg nicotine | ~ 6.51E-07 | 1.40E-06   | ~ 6.80E-07 | ~ 6.38E-07 | ~ 7.57E-07 | 1.40E-06   |
| <b>Silver</b>           | mg/mg nicotine | ~ 2.72E-08 | ~ 2.97E-08 | ~ 2.84E-08 | ~ 2.67E-08 | ~ 3.17E-08 | ~ 3.17E-08 |
| <b>Tin</b>              | mg/mg nicotine | ~ 1.63E-06 | ~ 2.97E-07 | ~ 2.84E-07 | ~ 1.60E-06 | ~ 3.17E-07 | ~ 1.63E-06 |
| <b>Zinc</b>             | mg/mg nicotine | ~ 1.36E-05 | ~ 4.46E-06 | ~ 4.26E-06 | ~ 4.00E-06 | ~ 4.75E-06 | ~ 1.36E-05 |
| <b>Organic Acids</b>    |                |            |            |            |            |            |            |
| <b>Benzoic Acid</b>     | mg/mg nicotine | 5.37E-01   | 4.90E-01   | 5.67E-01   | 4.96E-01   | 5.26E-01   | 5.67E-01   |
| <b>Propionic Acid</b>   | mg/mg nicotine | ~ 9.60E-05 | ~ 1.05E-04 | ~ 1.76E-03 | ~ 1.04E-03 | ~ 1.12E-04 | ~ 1.76E-03 |
| <b>VOCs</b>             |                |            |            |            |            |            |            |

|                              |                |            |    |    |    |    |            |
|------------------------------|----------------|------------|----|----|----|----|------------|
| <b>1,3-Butadiene</b>         | mg/mg nicotine | ~ 1.49E-06 | NT | NT | NT | NT | ~ 1.49E-06 |
| <b>Acrylonitrile</b>         | mg/mg nicotine | ~ 9.79E-07 | NT | NT | NT | NT | ~ 9.79E-07 |
| <b>Benzene</b>               | mg/mg nicotine | ~ 1.71E-06 | NT | NT | NT | NT | ~ 1.71E-06 |
| <b>Isoprene</b>              | mg/mg nicotine | ~ 2.30E-06 | NT | NT | NT | NT | ~ 2.30E-06 |
| <b>Propylene Oxide</b>       | mg/mg nicotine | ~ 3.96E-06 | NT | NT | NT | NT | ~ 3.96E-06 |
| <b>Toluene</b>               | mg/mg nicotine | ~ 1.21E-05 | NT | NT | NT | NT | ~ 1.21E-05 |
| <b>Esters &amp; Alcohols</b> |                |            |    |    |    |    |            |
| <b>1-Butanol</b>             | mg/mg nicotine | ~ 4.41E-05 | NT | NT | NT | NT | ~ 4.41E-05 |
| <b>Benzyl Acetate</b>        | mg/mg nicotine | ~ 6.84E-05 | NT | NT | NT | NT | ~ 6.84E-05 |
| <b>Ethyl Acetate</b>         | mg/mg nicotine | ~ 7.83E-05 | NT | NT | NT | NT | ~ 7.83E-05 |
| <b>Ethyl Acetoacetate</b>    | mg/mg nicotine | ~ 5.59E-05 | NT | NT | NT | NT | ~ 5.59E-05 |
| <b>Isoamyl Acetate</b>       | mg/mg nicotine | ~ 4.77E-05 | NT | NT | NT | NT | ~ 4.77E-05 |
| <b>Isobutyl Acetate</b>      | mg/mg nicotine | ~ 4.73E-05 | NT | NT | NT | NT | ~ 4.73E-05 |
| <b>Methyl Acetate</b>        | mg/mg nicotine | ~ 5.08E-05 | NT | NT | NT | NT | ~ 5.08E-05 |

~ = approximated numeric value (see Supplemental Materials Appendix 1A) generated from the corresponding LOD and LOQ (See Supplemental Materials Appendix 1B)

## 1.2 Virginia Tobacco 18 mg/mL Intense Nicotine Normalized Analytical Stability Results

| <b>Parameter/<br/>Constituent</b> | <b>Units</b>   | <b>T0</b>  | <b>T3</b>  | <b>T6</b>  | <b>T9</b>  | <b>T12</b> | <b>Max</b> |
|-----------------------------------|----------------|------------|------------|------------|------------|------------|------------|
| <b># of puffs</b>                 | NA             | 85 (*86)   | 86         | 87         | 84         | 83         | 87         |
| <b>pH</b>                         | NA             | 6.17       | 6.46       | 5.96       | 6.17       | 5.96       | 6.46       |
| <b>*Primary Constituents</b>      |                |            |            |            |            |            |            |
| <b>Nicotine</b>                   | mg/mg nicotine | 1.00E+00   | 1.00E+00   | 1.00E+00   | 1.00E+00   | 1.00E+00   | 1.00E+00   |
| <b>Glycerol</b>                   | mg/mg nicotine | 3.77E+01   | 4.12E+01   | 4.11E+01   | 4.06E+01   | 4.16E+01   | 4.16E+01   |
| <b>Propylene Glycol</b>           | mg/mg nicotine | 2.40E+01   | 2.53E+01   | 2.46E+01   | 2.50E+01   | 2.47E+01   | 2.53E+01   |
| <b>Water</b>                      | mg/mg nicotine | 3.97E+00   | 4.61E+00   | 4.55E+00   | 5.00E+00   | 4.85E+00   | 5.00E+00   |
| <b>Menthol</b>                    | mg/mg nicotine | ~ 4.50E-03 | ~ 4.38E-03 | ~ 4.45E-03 | ~ 4.51E-03 | ~ 4.74E-03 | ~ 4.74E-03 |

|                                        |                |            |            |            |            |            |            |
|----------------------------------------|----------------|------------|------------|------------|------------|------------|------------|
| <b>Diethylene Glycol</b>               | mg/mg nicotine | ~ 4.78E-03 | ~ 4.49E-03 | ~ 4.56E-03 | ~ 4.63E-03 | ~ 5.00E-03 | ~ 5.00E-03 |
| <b>Ethylene Glycol</b>                 | mg/mg nicotine | ~ 5.09E-03 | ~ 4.80E-03 | ~ 4.88E-03 | ~ 4.95E-03 | ~ 5.36E-03 | ~ 5.36E-03 |
| <b>Carbonyls &amp; Glycidol</b>        |                |            |            |            |            |            |            |
| <b>Acetaldehyde</b>                    | mg/mg nicotine | 2.56E-04   | 2.10E-04   | 2.30E-04   | 2.49E-04   | 3.96E-04   | 3.96E-04   |
| <b>Acrolein</b>                        | mg/mg nicotine | 1.80E-04   | 1.26E-04   | 1.14E-04   | 1.23E-04   | 4.05E-04   | 4.05E-04   |
| <b>Diacetyl</b>                        | mg/mg nicotine | ~ 4.21E-05 | ~ 4.04E-05 | ~ 4.07E-05 | ~ 3.75E-06 | ~ 4.27E-05 | ~ 4.27E-05 |
| <b>Formaldehyde</b>                    | mg/mg nicotine | 1.30E-03   | 1.18E-03   | 1.27E-03   | 1.29E-03   | 1.48E-03   | 1.48E-03   |
| <b>Glycidol</b>                        | mg/mg nicotine | 3.37E-04   | 2.11E-04   | 2.95E-04   | 2.11E-04   | 2.65E-04   | 3.37E-04   |
| <b>Acetyl Propionyl</b>                | mg/mg nicotine | ~ 3.68E-06 | ~ 3.52E-06 | ~ 3.65E-06 | ~ 3.70E-06 | ~ 3.92E-06 | ~ 3.92E-06 |
| <b>Butyraldehyde</b>                   | mg/mg nicotine | ~ 4.06E-06 | ~ 3.89E-06 | ~ 4.01E-05 | ~ 3.70E-06 | ~ 3.92E-06 | ~ 4.01E-05 |
| <b>Crotonaldehyde</b>                  | mg/mg nicotine | ~ 3.72E-06 | ~ 3.56E-06 | ~ 5.85E-06 | ~ 5.93E-06 | ~ 6.29E-06 | ~ 6.29E-06 |
| <b>Furfural</b>                        | mg/mg nicotine | ~ 5.15E-06 | ~ 4.92E-06 | ~ 5.99E-06 | ~ 4.32E-05 | ~ 6.43E-06 | ~ 4.32E-05 |
| <b>Nicotine Degradants &amp; TSNAs</b> |                |            |            |            |            |            |            |
| <b>β-Nicotyrine</b>                    | mg/mg nicotine | 1.37E-04   | 1.16E-04   | 1.59E-04   | 1.74E-04   | 1.42E-04   | 1.74E-04   |
| <b>Cotinine</b>                        | mg/mg nicotine | 2.02E-03   | 1.98E-03   | 2.29E-03   | 1.93E-03   | 2.54E-03   | 2.54E-03   |
| <b>Myosmine</b>                        | mg/mg nicotine | 1.88E-03   | 1.63E-03   | 1.98E-03   | 1.48E-03   | 1.92E-03   | 1.98E-03   |
| <b>Nicotine N Oxide</b>                | mg/mg nicotine | ~ 4.05E-05 | ~ 3.87E-05 | 6.33E-05   | ~ 3.25E-05 | ~ 3.44E-05 | 6.33E-05   |
| <b>Nornicotine</b>                     | mg/mg nicotine | 3.75E-04   | 4.38E-04   | 6.63E-04   | 6.07E-04   | 8.71E-04   | 8.71E-04   |
| <b>Anabasine</b>                       | mg/mg nicotine | ~ 3.05E-06 | ~ 2.92E-06 | ~ 2.93E-06 | ~ 2.98E-06 | ~ 3.15E-06 | ~ 3.15E-06 |
| <b>Anatabine</b>                       | mg/mg nicotine | ~ 3.04E-06 | ~ 2.91E-06 | ~ 2.92E-06 | ~ 3.26E-05 | ~ 3.14E-06 | ~ 3.26E-05 |
| <b>NNK</b>                             | mg/mg nicotine | ~ 7.83E-07 | NT         | NT         | NT         | NT         | ~ 7.83E-07 |
| <b>NNN</b>                             | mg/mg nicotine | ~ 9.41E-08 | NT         | NT         | NT         | NT         | ~ 9.41E-08 |
| <b>Metals</b>                          |                |            |            |            |            |            |            |
| <b>Arsenic</b>                         | mg/mg nicotine | ~ 2.85E-07 | ~ 2.73E-07 | ~ 2.77E-07 | ~ 2.81E-07 | ~ 2.97E-07 | ~ 2.97E-07 |
| <b>Beryllium</b>                       | mg/mg nicotine | ~ 6.27E-08 | ~ 6.00E-08 | ~ 6.09E-08 | ~ 6.17E-08 | ~ 6.54E-08 | ~ 6.54E-08 |
| <b>Cadmium</b>                         | mg/mg nicotine | ~ 2.85E-08 | ~ 2.73E-08 | ~ 2.77E-08 | ~ 2.81E-08 | ~ 2.97E-08 | ~ 2.97E-08 |
| <b>Chromium</b>                        | mg/mg nicotine | 4.11E-06   | ~ 2.73E-07 | ~ 2.77E-07 | ~ 2.81E-07 | ~ 2.97E-07 | 4.11E-06   |
| <b>Cobalt</b>                          | mg/mg nicotine | ~ 1.42E-08 | ~ 1.36E-08 | ~ 1.38E-08 | ~ 1.40E-08 | ~ 1.49E-08 | ~ 1.49E-08 |

|                              |                |            |            |            |            |            |            |
|------------------------------|----------------|------------|------------|------------|------------|------------|------------|
| <b>Copper</b>                | mg/mg nicotine | ~ 7.12E-07 | ~ 6.81E-07 | ~ 6.92E-07 | ~ 7.01E-07 | ~ 7.43E-07 | ~ 7.43E-07 |
| <b>Gold</b>                  | mg/mg nicotine | ~ 4.84E-06 | NT         | NT         | NT         | NT         | ~ 4.84E-06 |
| <b>Iron</b>                  | mg/mg nicotine | 3.40E-05   | ~ 2.73E-06 | ~ 2.77E-06 | ~ 2.81E-06 | ~ 2.97E-06 | 3.40E-05   |
| <b>Lead</b>                  | mg/mg nicotine | ~ 7.12E-08 | ~ 6.81E-08 | ~ 6.92E-08 | ~ 7.01E-08 | ~ 7.43E-08 | ~ 7.43E-08 |
| <b>Nickel</b>                | mg/mg nicotine | ~ 4.27E-07 | ~ 1.36E-07 | ~ 1.38E-07 | ~ 1.40E-07 | ~ 1.49E-07 | ~ 4.27E-07 |
| <b>Selenium</b>              | mg/mg nicotine | ~ 6.81E-07 | ~ 6.51E-07 | ~ 6.61E-07 | ~ 6.71E-07 | ~ 7.11E-07 | ~ 7.11E-07 |
| <b>Silver</b>                | mg/mg nicotine | ~ 2.85E-08 | ~ 1.64E-07 | ~ 2.77E-08 | ~ 2.81E-08 | ~ 2.97E-08 | ~ 1.64E-07 |
| <b>Tin</b>                   | mg/mg nicotine | ~ 1.71E-06 | ~ 1.64E-06 | ~ 1.66E-06 | ~ 2.81E-07 | ~ 2.97E-07 | ~ 1.71E-06 |
| <b>Zinc</b>                  | mg/mg nicotine | ~ 4.27E-06 | ~ 4.09E-06 | ~ 4.15E-06 | ~ 4.21E-06 | ~ 4.46E-06 | ~ 4.46E-06 |
| <b>Organic Acids</b>         |                |            |            |            |            |            |            |
| <b>Benzoic Acid</b>          | mg/mg nicotine | 5.30E-01   | 6.25E-01   | 7.84E-01   | 6.46E-01   | 5.86E-01   | 7.84E-01   |
| <b>Propionic Acid</b>        | mg/mg nicotine | ~ 1.01E-04 | ~ 1.06E-03 | ~ 2.43E-03 | ~ 9.90E-05 | ~ 1.15E-03 | ~ 2.43E-03 |
| <b>VOCs</b>                  |                |            |            |            |            |            |            |
| <b>1,3-Butadiene</b>         | mg/mg nicotine | ~ 1.56E-06 | NT         | NT         | NT         | NT         | ~ 1.56E-06 |
| <b>Acrylonitrile</b>         | mg/mg nicotine | ~ 1.02E-06 | NT         | NT         | NT         | NT         | ~ 1.02E-06 |
| <b>Benzene</b>               | mg/mg nicotine | ~ 1.79E-06 | NT         | NT         | NT         | NT         | ~ 1.79E-06 |
| <b>Isoprene</b>              | mg/mg nicotine | ~ 2.41E-06 | NT         | NT         | NT         | NT         | ~ 2.41E-06 |
| <b>Propylene Oxide</b>       | mg/mg nicotine | ~ 4.15E-06 | NT         | NT         | NT         | NT         | ~ 4.15E-06 |
| <b>Toluene</b>               | mg/mg nicotine | ~ 1.27E-05 | NT         | NT         | NT         | NT         | ~ 1.27E-05 |
| <b>Esters &amp; Alcohols</b> |                |            |            |            |            |            |            |
| <b>1-Butanol</b>             | mg/mg nicotine | ~ 4.61E-05 | NT         | NT         | NT         | NT         | ~ 4.61E-05 |
| <b>Benzyl Acetate</b>        | mg/mg nicotine | ~ 7.16E-05 | NT         | NT         | NT         | NT         | ~ 7.16E-05 |
| <b>Ethyl Acetate</b>         | mg/mg nicotine | ~ 8.19E-05 | NT         | NT         | NT         | NT         | ~ 8.19E-05 |
| <b>Ethyl Acetoacetate</b>    | mg/mg nicotine | ~ 5.85E-05 | NT         | NT         | NT         | NT         | ~ 5.85E-05 |
| <b>Isoamyl Acetate</b>       | mg/mg nicotine | ~ 4.99E-05 | NT         | NT         | NT         | NT         | ~ 4.99E-05 |
| <b>Isobutyl Acetate</b>      | mg/mg nicotine | ~ 4.94E-05 | NT         | NT         | NT         | NT         | ~ 4.94E-05 |
| <b>Methyl Acetate</b>        | mg/mg nicotine | ~ 5.32E-05 | NT         | NT         | NT         | NT         | ~ 5.32E-05 |

~ = approximated numeric value (see Supplemental Materials Appendix 1A) generated from the corresponding LOD and LOQ (See Supplemental Materials Appendix 1B)

### 1.3 Crisp Menthol 18 mg/mL Non-Intense Nicotine Normalized Analytical Stability Results

| Parameter/<br>Constituent              | Units          | T0         | T3         | T6         | T9         | T12        | Max        |
|----------------------------------------|----------------|------------|------------|------------|------------|------------|------------|
| # of puffs                             | NA             | 125        | 112        | 121        | 120        | 115        | 125        |
| pH                                     | NA             | 6.26       | 6.36       | 6.33       | 6.30       | 6.11       | 6.36       |
| <b>Primary Constituents</b>            |                |            |            |            |            |            |            |
| Nicotine                               | mg/mg nicotine | 1.00E+00   | 1.00E+00   | 1.00E+00   | 1.00E+00   | 1.00E+00   | 1.00E+00   |
| Glycerol                               | mg/mg nicotine | 2.56E+01   | 2.69E+01   | 2.58E+01   | 2.64E+01   | 2.65E+01   | 2.69E+01   |
| Propylene Glycol                       | mg/mg nicotine | 3.48E+01   | 3.77E+01   | 3.80E+01   | 3.76E+01   | 3.67E+01   | 3.80E+01   |
| Water                                  | mg/mg nicotine | 4.46E+00   | 3.79E+00   | 4.41E+00   | 4.07E+00   | 4.66E+00   | 4.66E+00   |
| Menthol                                | mg/mg nicotine | 7.17E-01   | 7.27E-01   | 7.17E-01   | 7.39E-01   | 7.03E-01   | 7.39E-01   |
| Diethylene Glycol                      | mg/mg nicotine | ~ 4.79E-03 | ~ 4.98E-03 | ~ 4.93E-03 | ~ 4.83E-03 | ~ 5.19E-03 | ~ 5.19E-03 |
| Ethylene Glycol                        | mg/mg nicotine | ~ 5.10E-03 | ~ 5.32E-03 | ~ 5.27E-03 | ~ 5.16E-03 | ~ 5.55E-03 | ~ 5.55E-03 |
| <b>Carbonyls &amp; Glycidol</b>        |                |            |            |            |            |            |            |
| Acetaldehyde                           | mg/mg nicotine | 1.37E-04   | 1.60E-04   | 1.60E-04   | 1.46E-04   | 1.67E-04   | 1.67E-04   |
| Acrolein                               | mg/mg nicotine | ~ 3.55E-05 | ~ 3.76E-05 | ~ 3.83E-05 | ~ 3.76E-05 | 1.06E-04   | 1.06E-04   |
| Diacetyl                               | mg/mg nicotine | ~ 3.61E-05 | ~ 3.83E-05 | ~ 3.77E-05 | ~ 3.36E-06 | ~ 3.80E-05 | ~ 3.83E-05 |
| Formaldehyde                           | mg/mg nicotine | 5.11E-04   | 6.98E-04   | 6.18E-04   | 6.64E-04   | 7.17E-04   | 7.17E-04   |
| Glycidol                               | mg/mg nicotine | 1.66E-04   | 1.26E-04   | 1.39E-04   | 1.58E-04   | 1.65E-04   | 1.66E-04   |
| Acetyl Propionyl                       | mg/mg nicotine | ~ 3.16E-06 | ~ 3.34E-06 | ~ 3.38E-06 | ~ 3.31E-06 | ~ 3.49E-06 | ~ 3.49E-06 |
| Butyraldehyde                          | mg/mg nicotine | ~ 3.49E-06 | ~ 3.69E-06 | ~ 3.38E-06 | ~ 3.31E-06 | ~ 3.48E-06 | ~ 3.69E-06 |
| Crotonaldehyde                         | mg/mg nicotine | ~ 3.19E-06 | ~ 3.38E-06 | ~ 5.42E-06 | ~ 5.31E-06 | ~ 5.59E-06 | ~ 5.59E-06 |
| Furfural                               | mg/mg nicotine | ~ 4.42E-06 | ~ 4.67E-06 | ~ 5.55E-06 | ~ 5.43E-06 | ~ 5.72E-06 | ~ 5.72E-06 |
| <b>Nicotine Degradants &amp; TSNAs</b> |                |            |            |            |            |            |            |
| β-Nicotryne                            | mg/mg nicotine | 1.07E-04   | 1.45E-04   | 1.69E-04   | 2.46E-04   | 2.25E-04   | 2.46E-04   |
| Cotinine                               | mg/mg nicotine | ~ 2.81E-05 | ~ 3.00E-05 | ~ 2.98E-05 | ~ 2.91E-05 | ~ 3.07E-05 | ~ 3.07E-05 |
| Myosmine                               | mg/mg nicotine | 8.75E-05   | 1.05E-04   | 1.32E-04   | 1.44E-04   | 1.66E-04   | 1.66E-04   |

|                         |                |            |            |            |            |            |            |
|-------------------------|----------------|------------|------------|------------|------------|------------|------------|
| <b>Nicotine N Oxide</b> | mg/mg nicotine | ~ 3.48E-05 | 9.90E-05   | 8.09E-05   | 1.03E-04   | 6.04E-05   | 1.03E-04   |
| <b>Nornicotine</b>      | mg/mg nicotine | 4.12E-04   | 5.39E-04   | 7.68E-04   | 7.26E-04   | 8.85E-04   | 8.85E-04   |
| <b>Anabasine</b>        | mg/mg nicotine | ~ 2.62E-06 | ~ 2.77E-06 | ~ 2.72E-06 | ~ 2.66E-06 | ~ 2.80E-06 | ~ 2.80E-06 |
| <b>Anatabine</b>        | mg/mg nicotine | ~ 2.61E-06 | ~ 2.76E-06 | ~ 2.71E-06 | ~ 2.65E-06 | ~ 2.79E-06 | ~ 2.79E-06 |
| <b>NNK</b>              | mg/mg nicotine | ~ 7.85E-07 | NT         | NT         | NT         | NT         | ~ 7.85E-07 |
| <b>NNN</b>              | mg/mg nicotine | ~ 9.42E-08 | NT         | NT         | NT         | NT         | ~ 9.42E-08 |
| <b>Metals</b>           |                |            |            |            |            |            |            |
| <b>Arsenic</b>          | mg/mg nicotine | ~ 2.85E-07 | ~ 3.02E-07 | ~ 2.99E-07 | ~ 2.93E-07 | ~ 3.08E-07 | ~ 3.08E-07 |
| <b>Beryllium</b>        | mg/mg nicotine | ~ 6.28E-08 | ~ 6.64E-08 | ~ 6.58E-08 | ~ 6.45E-08 | ~ 6.78E-08 | ~ 6.78E-08 |
| <b>Cadmium</b>          | mg/mg nicotine | ~ 2.85E-08 | ~ 3.02E-08 | ~ 2.99E-08 | ~ 2.93E-08 | ~ 3.08E-08 | ~ 3.08E-08 |
| <b>Chromium</b>         | mg/mg nicotine | ~ 1.71E-06 | ~ 3.02E-07 | ~ 2.99E-07 | ~ 2.93E-07 | ~ 3.08E-07 | ~ 1.71E-06 |
| <b>Cobalt</b>           | mg/mg nicotine | ~ 1.43E-08 | ~ 1.51E-08 | ~ 1.50E-08 | ~ 1.46E-08 | ~ 1.54E-08 | ~ 1.54E-08 |
| <b>Copper</b>           | mg/mg nicotine | ~ 2.85E-06 | ~ 7.55E-07 | ~ 7.48E-07 | ~ 7.32E-07 | ~ 7.71E-07 | ~ 2.85E-06 |
| <b>Gold</b>             | mg/mg nicotine | ~ 4.85E-06 | NT         | NT         | NT         | NT         | ~ 4.85E-06 |
| <b>Iron</b>             | mg/mg nicotine | 1.22E-05   | ~ 3.02E-06 | ~ 2.99E-06 | ~ 2.93E-06 | ~ 3.08E-06 | 1.22E-05   |
| <b>Lead</b>             | mg/mg nicotine | ~ 7.13E-08 | ~ 7.55E-08 | ~ 7.48E-08 | ~ 7.32E-08 | ~ 7.71E-08 | ~ 7.71E-08 |
| <b>Nickel</b>           | mg/mg nicotine | ~ 1.43E-07 | ~ 1.51E-07 | ~ 1.50E-07 | ~ 1.46E-07 | ~ 1.54E-07 | ~ 1.54E-07 |
| <b>Selenium</b>         | mg/mg nicotine | ~ 6.82E-07 | ~ 7.21E-07 | ~ 7.15E-07 | ~ 7.00E-07 | ~ 7.37E-07 | ~ 7.37E-07 |
| <b>Silver</b>           | mg/mg nicotine | ~ 2.85E-08 | ~ 3.02E-08 | ~ 2.99E-08 | ~ 2.93E-08 | ~ 3.08E-08 | ~ 3.08E-08 |
| <b>Tin</b>              | mg/mg nicotine | ~ 1.71E-06 | ~ 1.81E-06 | ~ 2.99E-07 | ~ 2.93E-07 | ~ 3.08E-07 | ~ 1.81E-06 |
| <b>Zinc</b>             | mg/mg nicotine | ~ 1.43E-05 | ~ 4.53E-06 | ~ 4.49E-06 | ~ 4.39E-06 | ~ 4.62E-06 | ~ 1.43E-05 |
| <b>Organic Acids</b>    |                |            |            |            |            |            |            |
| <b>Benzoic Acid</b>     | mg/mg nicotine | 6.20E-01   | 5.16E-01   | 5.86E-01   | 5.39E-01   | 5.21E-01   | 6.20E-01   |
| <b>Propionic Acid</b>   | mg/mg nicotine | ~ 1.77E-04 | ~ 1.87E-04 | ~ 1.05E-03 | ~ 1.14E-03 | ~ 1.20E-03 | ~ 1.20E-03 |
| <b>VOCs</b>             |                |            |            |            |            |            |            |
| <b>1,3-Butadiene</b>    | mg/mg nicotine | ~ 1.57E-06 | NT         | NT         | NT         | NT         | ~ 1.57E-06 |
| <b>Acrylonitrile</b>    | mg/mg nicotine | ~ 1.03E-06 | NT         | NT         | NT         | NT         | ~ 1.03E-06 |
| <b>Benzene</b>          | mg/mg nicotine | ~ 1.80E-06 | NT         | NT         | NT         | NT         | ~ 1.80E-06 |
| <b>Isoprene</b>         | mg/mg nicotine | ~ 2.41E-06 | NT         | NT         | NT         | NT         | ~ 2.41E-06 |

|                              |                |            |    |    |    |    |            |
|------------------------------|----------------|------------|----|----|----|----|------------|
| <b>Propylene Oxide</b>       | mg/mg nicotine | ~ 4.15E-06 | NT | NT | NT | NT | ~ 4.15E-06 |
| <b>Toluene</b>               | mg/mg nicotine | ~ 2.64E-06 | NT | NT | NT | NT | ~ 2.64E-06 |
| <b>Esters &amp; Alcohols</b> |                |            |    |    |    |    |            |
| <b>1-Butanol</b>             | mg/mg nicotine | ~ 4.62E-05 | NT | NT | NT | NT | ~ 4.62E-05 |
| <b>Benzyl Acetate</b>        | mg/mg nicotine | ~ 7.17E-05 | NT | NT | NT | NT | ~ 7.17E-05 |
| <b>Ethyl Acetate</b>         | mg/mg nicotine | 6.31E-03   | NT | NT | NT | NT | 6.31E-03   |
| <b>Ethyl Acetoacetate</b>    | mg/mg nicotine | ~ 5.86E-05 | NT | NT | NT | NT | ~ 5.86E-05 |
| <b>Isoamyl Acetate</b>       | mg/mg nicotine | ~ 5.00E-05 | NT | NT | NT | NT | ~ 5.00E-05 |
| <b>Isobutyl Acetate</b>      | mg/mg nicotine | ~ 4.95E-05 | NT | NT | NT | NT | ~ 4.95E-05 |
| <b>Methyl Acetate</b>        | mg/mg nicotine | ~ 5.33E-05 | NT | NT | NT | NT | ~ 5.33E-05 |

~ = approximated numeric value (see Supplemental Materials Appendix 1A) generated from the corresponding LOD and LOQ (See Supplemental Materials Appendix 1B)

#### 1.4 Crisp Menthol 18 mg/mL Intense Nicotine Normalized Analytical Stability Results

| Parameter/<br>Constituent       | Units          | T0         | T3         | T6         | T9         | T12        | Max        |
|---------------------------------|----------------|------------|------------|------------|------------|------------|------------|
| <b># of puffs</b>               | NA             | 81         | 88         | 82         | 87         | 81         | 88         |
| <b>pH</b>                       | NA             | 6.24       | 6.53       | 6.27       | 6.20       | 6.17       | 6.53       |
| <b>*Primary Constituents</b>    |                |            |            |            |            |            |            |
| <b>Nicotine</b>                 | mg/mg nicotine | 1.00E+00   | 1.00E+00   | 1.00E+00   | 1.00E+00   | 1.00E+00   | 1.00E+00   |
| <b>Glycerol</b>                 | mg/mg nicotine | 2.52E+01   | 2.68E+01   | 2.60E+01   | 2.65E+01   | 2.67E+01   | 2.68E+01   |
| <b>Propylene Glycol</b>         | mg/mg nicotine | 3.45E+01   | 3.76E+01   | 3.72E+01   | 3.75E+01   | 3.71E+01   | 3.76E+01   |
| <b>Water</b>                    | mg/mg nicotine | 3.83E+00   | 3.89E+00   | 4.28E+00   | 3.80E+00   | 4.29E+00   | 4.29E+00   |
| <b>Menthol</b>                  | mg/mg nicotine | 7.21E-01   | 7.09E-01   | 6.87E-01   | 7.18E-01   | 6.97E-01   | 7.21E-01   |
| <b>Diethylene Glycol</b>        | mg/mg nicotine | ~ 4.67E-03 | ~ 4.57E-03 | ~ 4.62E-03 | ~ 4.19E-03 | ~ 4.61E-03 | ~ 4.67E-03 |
| <b>Ethylene Glycol</b>          | mg/mg nicotine | ~ 4.97E-03 | ~ 4.89E-03 | ~ 4.93E-03 | ~ 4.48E-03 | ~ 4.93E-03 | ~ 4.97E-03 |
| <b>Carbonyls &amp; Glycidol</b> |                |            |            |            |            |            |            |
| <b>Acetaldehyde</b>             | mg/mg nicotine | 1.54E-04   | 1.30E-04   | 1.47E-04   | 2.18E-04   | 2.23E-04   | 2.23E-04   |



|                                        |                |            |            |            |            |            |            |
|----------------------------------------|----------------|------------|------------|------------|------------|------------|------------|
| <b>Acrolein</b>                        | mg/mg nicotine | ~ 4.03E-05 | ~ 4.03E-05 | ~ 3.59E-05 | 8.46E-05   | 2.20E-04   | 2.20E-04   |
| <b>Diacetyl</b>                        | mg/mg nicotine | ~ 4.10E-05 | ~ 4.11E-05 | ~ 3.45E-05 | ~ 3.66E-05 | ~ 4.28E-05 | ~ 4.28E-05 |
| <b>Formaldehyde</b>                    | mg/mg nicotine | 7.76E-04   | 7.91E-04   | 7.23E-04   | 1.04E-03   | 7.74E-04   | 1.04E-03   |
| <b>Glycidol</b>                        | mg/mg nicotine | 1.63E-04   | 1.67E-04   | 2.80E-04   | 1.38E-04   | 1.47E-04   | 2.80E-04   |
| <b>Acetyl Propionyl</b>                | mg/mg nicotine | ~ 3.59E-06 | ~ 3.58E-06 | ~ 3.17E-06 | ~ 3.35E-06 | ~ 4.96E-06 | ~ 4.96E-06 |
| <b>Butyraldehyde</b>                   | mg/mg nicotine | ~ 3.96E-06 | ~ 3.96E-06 | ~ 3.16E-06 | ~ 3.35E-06 | ~ 8.46E-06 | ~ 8.46E-06 |
| <b>Crotonaldehyde</b>                  | mg/mg nicotine | ~ 3.63E-06 | ~ 3.62E-06 | ~ 5.07E-06 | ~ 5.38E-06 | ~ 1.01E-05 | ~ 1.01E-05 |
| <b>Furfural</b>                        | mg/mg nicotine | ~ 5.02E-06 | ~ 5.01E-06 | ~ 5.19E-06 | ~ 5.50E-06 | ~ 8.32E-06 | ~ 8.32E-06 |
| <b>Nicotine Degradants &amp; TSNAs</b> |                |            |            |            |            |            |            |
| <b>β-Nicotyrine</b>                    | mg/mg nicotine | 1.26E-04   | 1.52E-04   | 1.94E-04   | 2.09E-04   | 2.03E-04   | 2.09E-04   |
| <b>Cotinine</b>                        | mg/mg nicotine | ~ 3.19E-05 | ~ 3.19E-05 | ~ 2.79E-05 | 6.08E-05   | ~ 3.18E-05 | 6.08E-05   |
| <b>Myosmine</b>                        | mg/mg nicotine | 1.04E-04   | 1.26E-04   | 1.44E-04   | 1.58E-04   | 1.46E-04   | 1.58E-04   |
| <b>Nicotine N Oxide</b>                | mg/mg nicotine | 6.36E-05   | ~ 3.94E-05 | ~ 2.78E-05 | 6.01E-05   | 5.90E-05   | 6.36E-05   |
| <b>Nornicotine</b>                     | mg/mg nicotine | 4.48E-04   | 5.98E-04   | 7.51E-04   | 7.68E-04   | 7.12E-04   | 7.68E-04   |
| <b>Anabasine</b>                       | mg/mg nicotine | ~ 2.98E-06 | ~ 2.97E-06 | ~ 2.54E-06 | ~ 2.70E-06 | ~ 2.90E-06 | ~ 2.98E-06 |
| <b>Anatabine</b>                       | mg/mg nicotine | ~ 2.97E-06 | ~ 2.96E-06 | ~ 2.53E-06 | ~ 2.68E-06 | ~ 2.89E-06 | ~ 2.97E-06 |
| <b>NNK</b>                             | mg/mg nicotine | ~ 7.64E-07 | NT         | NT         | NT         | NT         | ~ 7.64E-07 |
| <b>NNN</b>                             | mg/mg nicotine | ~ 9.18E-08 | NT         | NT         | NT         | NT         | ~ 9.18E-08 |
| <b>Metals</b>                          |                |            |            |            |            |            |            |
| <b>Arsenic</b>                         | mg/mg nicotine | ~ 2.78E-07 | ~ 2.77E-07 | ~ 2.80E-07 | ~ 2.54E-07 | ~ 2.74E-07 | ~ 2.80E-07 |
| <b>Beryllium</b>                       | mg/mg nicotine | ~ 6.11E-08 | ~ 6.10E-08 | ~ 6.16E-08 | ~ 5.59E-08 | ~ 6.02E-08 | ~ 6.16E-08 |
| <b>Cadmium</b>                         | mg/mg nicotine | ~ 2.78E-08 | ~ 2.77E-08 | ~ 2.80E-08 | ~ 2.54E-08 | ~ 2.74E-08 | ~ 2.80E-08 |
| <b>Chromium</b>                        | mg/mg nicotine | ~ 1.67E-06 | ~ 2.77E-07 | ~ 2.80E-07 | ~ 2.54E-07 | ~ 2.74E-07 | ~ 1.67E-06 |
| <b>Cobalt</b>                          | mg/mg nicotine | ~ 1.39E-08 | ~ 1.39E-08 | ~ 1.40E-08 | ~ 1.27E-08 | ~ 1.37E-08 | ~ 1.40E-08 |
| <b>Copper</b>                          | mg/mg nicotine | ~ 6.95E-07 | ~ 6.94E-07 | ~ 7.00E-07 | ~ 6.36E-07 | ~ 6.85E-07 | ~ 7.00E-07 |
| <b>Gold</b>                            | mg/mg nicotine | ~ 4.72E-06 | NT         | NT         | NT         | NT         | ~ 4.72E-06 |
| <b>Iron</b>                            | mg/mg nicotine | 1.23E-05   | ~ 2.77E-06 | ~ 2.80E-06 | ~ 2.54E-06 | ~ 2.74E-06 | 1.23E-05   |
| <b>Lead</b>                            | mg/mg nicotine | ~ 6.95E-08 | ~ 6.94E-08 | ~ 7.00E-08 | ~ 6.36E-08 | ~ 6.85E-08 | ~ 7.00E-08 |
| <b>Nickel</b>                          | mg/mg nicotine | ~ 1.39E-07 | ~ 1.39E-07 | ~ 1.40E-07 | ~ 1.27E-07 | ~ 1.37E-07 | ~ 1.40E-07 |

|                              |                |            |            |            |            |            |            |
|------------------------------|----------------|------------|------------|------------|------------|------------|------------|
| <b>Selenium</b>              | mg/mg nicotine | ~ 6.64E-07 | ~ 6.63E-07 | ~ 6.69E-07 | ~ 6.08E-07 | ~ 6.54E-07 | ~ 6.69E-07 |
| <b>Silver</b>                | mg/mg nicotine | ~ 2.78E-08 | ~ 1.66E-07 | ~ 2.80E-08 | ~ 2.54E-08 | ~ 2.74E-08 | ~ 1.66E-07 |
| <b>Tin</b>                   | mg/mg nicotine | ~ 1.67E-06 | ~ 1.66E-06 | ~ 1.68E-06 | ~ 1.53E-06 | ~ 2.74E-07 | ~ 1.68E-06 |
| <b>Zinc</b>                  | mg/mg nicotine | ~ 4.17E-06 | ~ 4.16E-06 | ~ 4.20E-06 | ~ 3.81E-06 | ~ 4.11E-06 | ~ 4.20E-06 |
| <b>Organic Acids</b>         |                |            |            |            |            |            |            |
| <b>Benzoic Acid</b>          | mg/mg nicotine | 7.34E-01   | 6.82E-01   | 5.36E-01   | 6.12E-01   | 6.29E-01   | 7.34E-01   |
| <b>Propionic Acid</b>        | mg/mg nicotine | ~ 1.72E-04 | ~ 1.28E-04 | ~ 9.87E-05 | ~ 9.87E-04 | ~ 1.06E-03 | ~ 1.06E-03 |
| <b>VOCs</b>                  |                |            |            |            |            |            |            |
| <b>1,3-Butadiene</b>         | mg/mg nicotine | ~ 1.53E-06 | NT         | NT         | NT         | NT         | ~ 1.53E-06 |
| <b>Acrylonitrile</b>         | mg/mg nicotine | ~ 9.99E-07 | NT         | NT         | NT         | NT         | ~ 9.99E-07 |
| <b>Benzene</b>               | mg/mg nicotine | ~ 1.75E-06 | NT         | NT         | NT         | NT         | ~ 1.75E-06 |
| <b>Isoprene</b>              | mg/mg nicotine | ~ 2.35E-06 | NT         | NT         | NT         | NT         | ~ 2.35E-06 |
| <b>Propylene Oxide</b>       | mg/mg nicotine | ~ 4.05E-06 | NT         | NT         | NT         | NT         | ~ 4.05E-06 |
| <b>Toluene</b>               | mg/mg nicotine | ~ 1.24E-05 | NT         | NT         | NT         | NT         | ~ 1.24E-05 |
| <b>Esters &amp; Alcohols</b> |                |            |            |            |            |            |            |
| <b>1-Butanol</b>             | mg/mg nicotine | ~ 4.50E-05 | NT         | NT         | NT         | NT         | ~ 4.50E-05 |
| <b>Benzyl Acetate</b>        | mg/mg nicotine | ~ 6.98E-05 | NT         | NT         | NT         | NT         | ~ 6.98E-05 |
| <b>Ethyl Acetate</b>         | mg/mg nicotine | 6.60E-03   | NT         | NT         | NT         | NT         | 6.60E-03   |
| <b>Ethyl Acetoacetate</b>    | mg/mg nicotine | ~ 5.71E-05 | NT         | NT         | NT         | NT         | ~ 5.71E-05 |
| <b>Isoamyl Acetate</b>       | mg/mg nicotine | ~ 4.87E-05 | NT         | NT         | NT         | NT         | ~ 4.87E-05 |
| <b>Isobutyl Acetate</b>      | mg/mg nicotine | ~ 4.82E-05 | NT         | NT         | NT         | NT         | ~ 4.82E-05 |
| <b>Methyl Acetate</b>        | mg/mg nicotine | ~ 5.19E-05 | NT         | NT         | NT         | NT         | ~ 5.19E-05 |

~ = approximated numeric value (see Supplemental Materials Appendix 1A) generated from the corresponding LOD and LOQ (See Supplemental Materials Appendix 1B)

## 1.5 Polar Menthol 18 mg/mL Non-Intense Nicotine Normalized Analytical Stability Results

| Parameter/<br>Constituent | Units | T0 | T3 | T6 | T9 | T12 | Max |
|---------------------------|-------|----|----|----|----|-----|-----|
|---------------------------|-------|----|----|----|----|-----|-----|

|                                        |                |            |            |            |            |            |            |
|----------------------------------------|----------------|------------|------------|------------|------------|------------|------------|
| # of puffs                             | NA             | 100        | 132        | 115        | 122        | 106        | 132        |
| pH                                     | NA             | 6.31       | 6.55       | 6.32       | 6.38       | 6.54       | 6.55       |
| <b>Primary Constituents</b>            |                |            |            |            |            |            |            |
| Nicotine                               | mg/mg nicotine | 1.00E+00   | 1.00E+00   | 1.00E+00   | 1.00E+00   | 1.00E+00   | 1.00E+00   |
| Glycerol                               | mg/mg nicotine | 2.56E+01   | 2.72E+01   | 2.66E+01   | 2.67E+01   | 2.71E+01   | 2.72E+01   |
| Propylene Glycol                       | mg/mg nicotine | 3.54E+01   | 3.84E+01   | 4.50E+01   | 3.78E+01   | 3.72E+01   | 4.50E+01   |
| Water                                  | mg/mg nicotine | 3.66E+00   | 4.77E+00   | 4.43E+00   | 3.84E+00   | 4.92E+00   | 4.92E+00   |
| Menthol                                | mg/mg nicotine | 7.72E-01   | 7.65E-01   | 7.67E-01   | 7.88E-01   | 7.57E-01   | 7.88E-01   |
| Diethylene Glycol                      | mg/mg nicotine | ~ 5.24E-03 | ~ 4.65E-03 | ~ 4.98E-03 | ~ 4.27E-03 | ~ 5.53E-03 | ~ 5.53E-03 |
| Ethylene Glycol                        | mg/mg nicotine | ~ 5.58E-03 | ~ 4.97E-03 | ~ 5.32E-03 | ~ 4.56E-03 | ~ 5.92E-03 | ~ 5.92E-03 |
| <b>Carbonyls &amp; Glycidol</b>        |                |            |            |            |            |            |            |
| Acetaldehyde                           | mg/mg nicotine | ~ 4.06E-05 | 1.76E-04   | 1.56E-04   | 1.90E-04   | 2.90E-04   | 2.90E-04   |
| Acrolein                               | mg/mg nicotine | ~ 3.88E-05 | ~ 3.51E-05 | ~ 3.87E-05 | ~ 3.32E-05 | 1.28E-04   | 1.28E-04   |
| Diacetyl                               | mg/mg nicotine | ~ 3.87E-06 | ~ 3.50E-06 | ~ 3.46E-06 | ~ 2.97E-06 | ~ 3.77E-06 | ~ 3.87E-06 |
| Formaldehyde                           | mg/mg nicotine | 3.18E-04   | 6.73E-04   | 5.43E-04   | 6.40E-04   | 8.77E-04   | 8.77E-04   |
| Glycidol                               | mg/mg nicotine | 1.14E-04   | 1.31E-04   | 1.44E-04   | 1.41E-04   | 1.64E-04   | 1.64E-04   |
| Acetyl Propionyl                       | mg/mg nicotine | ~ 3.45E-06 | ~ 3.12E-06 | ~ 3.41E-06 | ~ 2.93E-06 | ~ 3.72E-06 | ~ 3.72E-06 |
| Butyraldehyde                          | mg/mg nicotine | ~ 3.82E-06 | ~ 3.45E-06 | ~ 3.41E-06 | ~ 2.92E-06 | ~ 3.71E-06 | ~ 3.82E-06 |
| Crotonaldehyde                         | mg/mg nicotine | ~ 3.49E-06 | ~ 3.16E-06 | ~ 5.47E-06 | ~ 4.69E-06 | ~ 5.96E-06 | ~ 5.96E-06 |
| Furfural                               | mg/mg nicotine | ~ 4.83E-06 | ~ 4.37E-06 | ~ 5.60E-06 | ~ 4.80E-06 | ~ 6.10E-06 | ~ 6.10E-06 |
| <b>Nicotine Degradants &amp; TSNAs</b> |                |            |            |            |            |            |            |
| β-Nicotyrine                           | mg/mg nicotine | ~ 3.08E-05 | 1.41E-04   | 1.45E-04   | 2.75E-04   | 3.08E-04   | 3.08E-04   |
| Cotinine                               | mg/mg nicotine | ~ 3.07E-05 | 8.76E-05   | 8.64E-05   | 6.74E-05   | 1.57E-04   | 1.57E-04   |
| Myosmine                               | mg/mg nicotine | 8.57E-05   | 2.12E-04   | 2.31E-04   | 2.76E-04   | 4.00E-04   | 4.00E-04   |
| Nicotine N Oxide                       | mg/mg nicotine | ~ 3.80E-05 | 7.32E-05   | 1.17E-04   | 9.71E-05   | 6.25E-05   | 1.17E-04   |
| Nornicotine                            | mg/mg nicotine | 1.34E-04   | 4.23E-04   | 5.18E-04   | 6.30E-04   | 9.36E-04   | 9.36E-04   |
| Anabasine                              | mg/mg nicotine | ~ 2.86E-06 | ~ 2.59E-06 | ~ 2.74E-06 | ~ 2.35E-06 | ~ 2.99E-06 | ~ 2.99E-06 |
| Anatabine                              | mg/mg nicotine | ~ 3.11E-05 | ~ 2.81E-05 | ~ 3.00E-05 | ~ 2.58E-05 | ~ 3.27E-05 | ~ 3.27E-05 |
| NNK                                    | mg/mg nicotine | ~ 8.58E-07 | NT         | NT         | NT         | NT         | ~ 8.58E-07 |

|                              |                |            |            |            |            |            |            |
|------------------------------|----------------|------------|------------|------------|------------|------------|------------|
| NNN                          | mg/mg nicotine | ~ 1.03E-07 | NT         | NT         | NT         | NT         | ~ 1.03E-07 |
| <b>Metals</b>                |                |            |            |            |            |            |            |
| Arsenic                      | mg/mg nicotine | ~ 3.12E-07 | ~ 1.69E-06 | ~ 1.81E-06 | ~ 1.55E-06 | ~ 3.29E-07 | ~ 1.81E-06 |
| Beryllium                    | mg/mg nicotine | ~ 6.87E-08 | ~ 6.21E-08 | ~ 6.64E-08 | ~ 5.70E-08 | ~ 7.23E-08 | ~ 7.23E-08 |
| Cadmium                      | mg/mg nicotine | ~ 3.12E-08 | ~ 2.82E-08 | ~ 3.02E-08 | ~ 2.59E-08 | ~ 3.29E-08 | ~ 3.29E-08 |
| Chromium                     | mg/mg nicotine | ~ 1.87E-06 | ~ 2.82E-07 | ~ 3.02E-07 | ~ 2.59E-07 | ~ 3.29E-07 | ~ 1.87E-06 |
| Cobalt                       | mg/mg nicotine | ~ 1.56E-08 | ~ 1.41E-08 | ~ 1.51E-08 | ~ 1.29E-08 | ~ 1.64E-08 | ~ 1.64E-08 |
| Copper                       | mg/mg nicotine | ~ 3.12E-06 | ~ 7.06E-07 | ~ 3.02E-06 | ~ 6.47E-07 | ~ 3.29E-06 | ~ 3.29E-06 |
| Gold                         | mg/mg nicotine | ~ 5.31E-06 | NT         | NT         | NT         | NT         | ~ 5.31E-06 |
| Iron                         | mg/mg nicotine | ~ 9.36E-06 | ~ 2.82E-06 | ~ 3.02E-06 | ~ 2.59E-06 | ~ 3.29E-06 | ~ 9.36E-06 |
| Lead                         | mg/mg nicotine | ~ 7.80E-08 | ~ 7.06E-08 | ~ 7.55E-08 | ~ 6.47E-08 | ~ 8.22E-08 | ~ 8.22E-08 |
| Nickel                       | mg/mg nicotine | ~ 1.56E-07 | ~ 4.23E-07 | ~ 4.53E-07 | ~ 1.29E-07 | ~ 1.64E-07 | ~ 4.53E-07 |
| Selenium                     | mg/mg nicotine | ~ 7.46E-07 | ~ 6.75E-07 | 1.21E-06   | ~ 6.19E-07 | ~ 7.86E-07 | 1.21E-06   |
| Silver                       | mg/mg nicotine | ~ 3.12E-08 | ~ 2.82E-08 | ~ 3.02E-08 | ~ 2.59E-08 | ~ 3.29E-08 | ~ 3.29E-08 |
| Tin                          | mg/mg nicotine | ~ 3.12E-07 | ~ 2.82E-07 | ~ 3.02E-07 | ~ 2.59E-07 | ~ 3.29E-07 | ~ 3.29E-07 |
| Zinc                         | mg/mg nicotine | ~ 1.56E-05 | ~ 4.23E-06 | ~ 4.53E-06 | ~ 3.88E-06 | ~ 4.93E-06 | ~ 1.56E-05 |
| <b>Organic Acids</b>         |                |            |            |            |            |            |            |
| Benzoic Acid                 | mg/mg nicotine | 5.08E-01   | 5.75E-01   | 5.81E-01   | 5.21E-01   | 5.46E-01   | 5.81E-01   |
| Propionic Acid               | mg/mg nicotine | ~ 1.10E-04 | ~ 9.96E-05 | ~ 1.33E-03 | ~ 1.01E-03 | ~ 2.03E-04 | ~ 1.33E-03 |
| <b>VOCs</b>                  |                |            |            |            |            |            |            |
| 1,3-Butadiene                | mg/mg nicotine | ~ 1.71E-06 | NT         | NT         | NT         | NT         | ~ 1.71E-06 |
| Acrylonitrile                | mg/mg nicotine | ~ 1.12E-06 | NT         | NT         | NT         | NT         | ~ 1.12E-06 |
| Benzene                      | mg/mg nicotine | ~ 1.97E-06 | NT         | NT         | NT         | NT         | ~ 1.97E-06 |
| Isoprene                     | mg/mg nicotine | ~ 2.64E-06 | NT         | NT         | NT         | NT         | ~ 2.64E-06 |
| Propylene Oxide              | mg/mg nicotine | ~ 4.54E-06 | NT         | NT         | NT         | NT         | ~ 4.54E-06 |
| Toluene                      | mg/mg nicotine | ~ 2.89E-06 | NT         | NT         | NT         | NT         | ~ 2.89E-06 |
| <b>Esters &amp; Alcohols</b> |                |            |            |            |            |            |            |
| 1-Butanol                    | mg/mg nicotine | ~ 5.06E-05 | NT         | NT         | NT         | NT         | ~ 5.06E-05 |

|                           |                |            |    |    |    |    |            |
|---------------------------|----------------|------------|----|----|----|----|------------|
| <b>Benzyl Acetate</b>     | mg/mg nicotine | ~ 7.84E-05 | NT | NT | NT | NT | ~ 7.84E-05 |
| <b>Ethyl Acetate</b>      | mg/mg nicotine | ~ 9.87E-04 | NT | NT | NT | NT | ~ 9.87E-04 |
| <b>Ethyl Acetoacetate</b> | mg/mg nicotine | ~ 6.41E-05 | NT | NT | NT | NT | ~ 6.41E-05 |
| <b>Isoamyl Acetate</b>    | mg/mg nicotine | ~ 5.47E-05 | NT | NT | NT | NT | ~ 5.47E-05 |
| <b>Isobutyl Acetate</b>   | mg/mg nicotine | ~ 5.42E-05 | NT | NT | NT | NT | ~ 5.42E-05 |
| <b>Methyl Acetate</b>     | mg/mg nicotine | ~ 5.82E-05 | NT | NT | NT | NT | ~ 5.82E-05 |

~ = approximated numeric value (see Supplemental Materials Appendix 1A) generated from the corresponding LOD and LOQ (See Supplemental Materials Appendix 1B)

## 1.6 Polar Menthol 18 mg/mL Intense Nicotine Normalized Analytical Stability Results

| Parameter/<br>Constituent       | Units          | T0         | T3         | T6         | T9         | T12        | Max        |
|---------------------------------|----------------|------------|------------|------------|------------|------------|------------|
| <b># of puffs</b>               | NA             | 81         | 81         | 81         | 81         | 80         | 81         |
| <b>pH</b>                       | NA             | 6.24       | 6.57       | 6.36       | 6.22       | 6.42       | 6.57       |
| <b>Primary Constituents</b>     |                |            |            |            |            |            |            |
| <b>Nicotine</b>                 | mg/mg nicotine | 1.00E+00   | 1.00E+00   | 1.00E+00   | 1.00E+00   | 1.00E+00   | 1.00E+00   |
| <b>Glycerol</b>                 | mg/mg nicotine | 2.56E+01   | 2.73E+01   | 2.66E+01   | 2.69E+01   | 2.74E+01   | 2.74E+01   |
| <b>Propylene Glycol</b>         | mg/mg nicotine | 3.53E+01   | 4.04E+01   | 3.76E+01   | 3.79E+01   | 3.75E+01   | 4.04E+01   |
| <b>Water</b>                    | mg/mg nicotine | 4.06E+00   | 4.00E+00   | 4.08E+00   | 3.61E+00   | 4.21E+00   | 4.21E+00   |
| <b>Menthol</b>                  | mg/mg nicotine | 7.67E-01   | 7.58E-01   | 7.27E-01   | 7.70E-01   | 7.37E-01   | 7.70E-01   |
| <b>Diethylene Glycol</b>        | mg/mg nicotine | ~ 4.71E-03 | ~ 4.65E-03 | ~ 4.69E-03 | ~ 4.22E-03 | ~ 4.67E-03 | ~ 4.71E-03 |
| <b>Ethylene Glycol</b>          | mg/mg nicotine | ~ 5.01E-03 | ~ 4.98E-03 | ~ 5.02E-03 | ~ 4.51E-03 | ~ 5.00E-03 | ~ 5.02E-03 |
| <b>Carbonyls &amp; Glycidol</b> |                |            |            |            |            |            |            |
| <b>Acetaldehyde</b>             | mg/mg nicotine | 1.11E-04   | 1.51E-04   | 1.82E-04   | 2.38E-04   | 3.14E-04   | 3.14E-04   |
| <b>Acrolein</b>                 | mg/mg nicotine | 9.22E-05   | 9.07E-05   | ~ 4.26E-05 | 7.38E-05   | 2.79E-04   | 2.79E-04   |
| <b>Diacetyl</b>                 | mg/mg nicotine | ~ 4.06E-06 | ~ 4.18E-05 | ~ 4.19E-05 | ~ 3.42E-06 | ~ 4.33E-05 | ~ 4.33E-05 |
| <b>Formaldehyde</b>             | mg/mg nicotine | 6.67E-04   | 7.61E-04   | 7.57E-04   | 8.64E-04   | 8.65E-04   | 8.65E-04   |
| <b>Glycidol</b>                 | mg/mg nicotine | 2.06E-04   | 1.75E-04   | 1.91E-04   | 1.17E-04   | 1.98E-04   | 2.06E-04   |

|                                        |                |            |            |            |            |            |            |
|----------------------------------------|----------------|------------|------------|------------|------------|------------|------------|
| <b>Acetyl Propionyl</b>                | mg/mg nicotine | ~ 3.62E-06 | ~ 3.64E-06 | ~ 3.76E-06 | ~ 3.37E-06 | ~ 5.03E-06 | ~ 5.03E-06 |
| <b>Butyraldehyde</b>                   | mg/mg nicotine | ~ 4.00E-06 | ~ 4.03E-06 | ~ 3.75E-06 | ~ 3.37E-06 | ~ 8.57E-06 | ~ 8.57E-06 |
| <b>Crotonaldehyde</b>                  | mg/mg nicotine | ~ 3.66E-06 | ~ 3.69E-06 | ~ 6.02E-06 | ~ 5.41E-06 | ~ 1.02E-05 | ~ 1.02E-05 |
| <b>Furfural</b>                        | mg/mg nicotine | ~ 5.07E-06 | ~ 5.10E-06 | ~ 6.16E-06 | ~ 5.53E-06 | ~ 8.43E-06 | ~ 8.43E-06 |
| <b>Nicotine Degradants &amp; TSNAs</b> |                |            |            |            |            |            |            |
| <b>β-Nicotyrine</b>                    | mg/mg nicotine | ~ 3.23E-05 | 1.39E-04   | 1.79E-04   | 3.38E-04   | 2.55E-04   | 3.38E-04   |
| <b>Cotinine</b>                        | mg/mg nicotine | ~ 3.22E-05 | 5.96E-05   | 7.76E-05   | 1.01E-04   | 1.15E-04   | 1.15E-04   |
| <b>Myosmine</b>                        | mg/mg nicotine | 1.22E-04   | 2.15E-04   | 2.82E-04   | 2.92E-04   | 3.28E-04   | 3.28E-04   |
| <b>Nicotine N Oxide</b>                | mg/mg nicotine | ~ 3.99E-05 | ~ 4.01E-05 | ~ 3.30E-05 | ~ 2.96E-05 | ~ 3.21E-05 | ~ 4.01E-05 |
| <b>Nornicotine</b>                     | mg/mg nicotine | 1.48E-04   | 3.79E-04   | 4.78E-04   | 6.46E-04   | 7.08E-04   | 7.08E-04   |
| <b>Anabasine</b>                       | mg/mg nicotine | ~ 3.00E-06 | ~ 3.02E-06 | ~ 3.02E-06 | ~ 2.98E-05 | ~ 2.94E-06 | ~ 2.98E-05 |
| <b>Anatabine</b>                       | mg/mg nicotine | ~ 3.26E-05 | ~ 3.28E-05 | ~ 3.31E-05 | ~ 2.97E-05 | ~ 3.22E-05 | ~ 3.31E-05 |
| <b>NNK</b>                             | mg/mg nicotine | ~ 7.71E-07 | NT         | NT         | NT         | NT         | ~ 7.71E-07 |
| <b>NNN</b>                             | mg/mg nicotine | ~ 9.26E-08 | NT         | NT         | NT         | NT         | ~ 9.26E-08 |
| <b>Metals</b>                          |                |            |            |            |            |            |            |
| <b>Arsenic</b>                         | mg/mg nicotine | ~ 2.81E-07 | ~ 2.82E-07 | ~ 1.71E-06 | ~ 2.56E-07 | ~ 2.77E-07 | ~ 1.71E-06 |
| <b>Beryllium</b>                       | mg/mg nicotine | ~ 6.17E-08 | ~ 6.21E-08 | ~ 6.26E-08 | ~ 5.63E-08 | ~ 6.10E-08 | ~ 6.26E-08 |
| <b>Cadmium</b>                         | mg/mg nicotine | ~ 2.81E-08 | ~ 2.82E-08 | ~ 2.85E-08 | ~ 2.56E-08 | ~ 2.77E-08 | ~ 2.85E-08 |
| <b>Chromium</b>                        | mg/mg nicotine | ~ 1.68E-06 | ~ 2.82E-07 | ~ 2.85E-07 | ~ 2.56E-07 | ~ 1.66E-06 | ~ 1.68E-06 |
| <b>Cobalt</b>                          | mg/mg nicotine | ~ 1.40E-08 | ~ 1.41E-08 | ~ 1.42E-08 | ~ 1.28E-08 | ~ 1.39E-08 | ~ 1.42E-08 |
| <b>Copper</b>                          | mg/mg nicotine | ~ 7.01E-07 | ~ 7.06E-07 | ~ 7.12E-07 | ~ 6.39E-07 | ~ 6.94E-07 | ~ 7.12E-07 |
| <b>Gold</b>                            | mg/mg nicotine | ~ 4.77E-06 | NT         | NT         | NT         | NT         | ~ 4.77E-06 |
| <b>Iron</b>                            | mg/mg nicotine | ~ 8.42E-06 | ~ 2.82E-06 | ~ 2.85E-06 | ~ 2.56E-06 | ~ 2.77E-06 | ~ 8.42E-06 |
| <b>Lead</b>                            | mg/mg nicotine | ~ 7.01E-08 | ~ 7.06E-08 | ~ 7.12E-08 | ~ 6.39E-08 | ~ 6.94E-08 | ~ 7.12E-08 |
| <b>Nickel</b>                          | mg/mg nicotine | ~ 1.40E-07 | ~ 4.23E-07 | ~ 1.42E-07 | ~ 1.28E-07 | ~ 1.39E-07 | ~ 4.23E-07 |
| <b>Selenium</b>                        | mg/mg nicotine | ~ 6.70E-07 | ~ 6.75E-07 | 1.40E-06   | ~ 6.11E-07 | ~ 6.63E-07 | 1.40E-06   |
| <b>Silver</b>                          | mg/mg nicotine | ~ 2.81E-08 | ~ 1.69E-07 | ~ 2.85E-08 | ~ 2.56E-08 | ~ 2.77E-08 | ~ 1.69E-07 |
| <b>Tin</b>                             | mg/mg nicotine | ~ 2.81E-07 | ~ 1.69E-06 | ~ 1.71E-06 | ~ 1.53E-06 | ~ 2.77E-07 | ~ 1.71E-06 |

|                              |                |            |            |            |            |            |            |
|------------------------------|----------------|------------|------------|------------|------------|------------|------------|
| <b>Zinc</b>                  | mg/mg nicotine | ~ 4.21E-06 | ~ 4.23E-06 | ~ 1.42E-05 | ~ 3.84E-06 | ~ 4.16E-06 | ~ 1.42E-05 |
| <b>Organic Acids</b>         |                |            |            |            |            |            |            |
| <b>Benzoic Acid</b>          | mg/mg nicotine | 7.22E-01   | 7.14E-01   | 6.36E-01   | 6.35E-01   | 6.00E-01   | 7.22E-01   |
| <b>Propionic Acid</b>        | mg/mg nicotine | ~ 9.90E-05 | ~ 1.10E-03 | ~ 1.76E-03 | ~ 9.93E-04 | ~ 1.72E-04 | ~ 1.76E-03 |
| <b>VOCs</b>                  |                |            |            |            |            |            |            |
| <b>1,3-Butadiene</b>         | mg/mg nicotine | ~ 1.54E-06 | NT         | NT         | NT         | NT         | ~ 1.54E-06 |
| <b>Acrylonitrile</b>         | mg/mg nicotine | ~ 1.01E-06 | NT         | NT         | NT         | NT         | ~ 1.01E-06 |
| <b>Benzene</b>               | mg/mg nicotine | ~ 1.77E-06 | NT         | NT         | NT         | NT         | ~ 1.77E-06 |
| <b>Isoprene</b>              | mg/mg nicotine | ~ 2.37E-06 | NT         | NT         | NT         | NT         | ~ 2.37E-06 |
| <b>Propylene Oxide</b>       | mg/mg nicotine | ~ 4.08E-06 | NT         | NT         | NT         | NT         | ~ 4.08E-06 |
| <b>Toluene</b>               | mg/mg nicotine | ~ 2.60E-06 | NT         | NT         | NT         | NT         | ~ 2.60E-06 |
| <b>Esters &amp; Alcohols</b> |                |            |            |            |            |            |            |
| <b>1-Butanol</b>             | mg/mg nicotine | ~ 4.54E-05 | NT         | NT         | NT         | NT         | ~ 4.54E-05 |
| <b>Benzyl Acetate</b>        | mg/mg nicotine | ~ 7.05E-05 | NT         | NT         | NT         | NT         | ~ 7.05E-05 |
| <b>Ethyl Acetate</b>         | mg/mg nicotine | ~ 8.88E-04 | NT         | NT         | NT         | NT         | ~ 8.88E-04 |
| <b>Ethyl Acetoacetate</b>    | mg/mg nicotine | ~ 5.76E-05 | NT         | NT         | NT         | NT         | ~ 5.76E-05 |
| <b>Isoamyl Acetate</b>       | mg/mg nicotine | ~ 4.92E-05 | NT         | NT         | NT         | NT         | ~ 4.92E-05 |
| <b>Isobutyl Acetate</b>      | mg/mg nicotine | ~ 4.87E-05 | NT         | NT         | NT         | NT         | ~ 4.87E-05 |
| <b>Methyl Acetate</b>        | mg/mg nicotine | ~ 5.24E-05 | NT         | NT         | NT         | NT         | ~ 5.24E-05 |

~ = approximated numeric value (see Supplemental Materials Appendix 1A) generated from the corresponding LOD and LOQ (See Supplemental Materials Appendix 1B)

## 1.7 Autumn Tobacco 18 mg/mL Non-Intense Nicotine Normalized Analytical Stability Results

| Parameter/<br>Constituent   | Units | T0   | T3   | T6   | T9   | T12  | Max  |
|-----------------------------|-------|------|------|------|------|------|------|
| # of puffs                  | NA    | 128  | 128  | 119  | 122  | 124  | 128  |
| pH                          | NA    | 6.36 | 6.16 | 6.37 | 6.41 | 6.14 | 6.41 |
| <b>Primary Constituents</b> |       |      |      |      |      |      |      |

|                                        |                |            |            |            |            |            |            |
|----------------------------------------|----------------|------------|------------|------------|------------|------------|------------|
| <b>Nicotine</b>                        | mg/mg nicotine | 1.00E+00   | 1.00E+00   | 1.00E+00   | 1.00E+00   | 1.00E+00   | 1.00E+00   |
| <b>Glycerol</b>                        | mg/mg nicotine | 2.59E+01   | 2.58E+01   | 2.48E+01   | 2.44E+01   | 2.45E+01   | 2.59E+01   |
| <b>Propylene Glycol</b>                | mg/mg nicotine | 3.40E+01   | 3.32E+01   | 3.16E+01   | 3.17E+01   | 3.32E+01   | 3.40E+01   |
| <b>Water</b>                           | mg/mg nicotine | 3.23E+00   | 4.48E+00   | 4.18E+00   | 4.44E+00   | 6.24E+00   | 6.24E+00   |
| <b>Menthol</b>                         | mg/mg nicotine | ~ 1.46E-03 | ~ 1.46E-03 | ~ 4.33E-04 | ~ 4.09E-04 | ~ 2.01E-03 | ~ 2.01E-03 |
| <b>Diethylene Glycol</b>               | mg/mg nicotine | ~ 1.34E-03 | ~ 1.34E-03 | ~ 3.97E-04 | ~ 3.76E-04 | ~ 1.84E-03 | ~ 1.84E-03 |
| <b>Ethylene Glycol</b>                 | mg/mg nicotine | ~ 9.36E-04 | ~ 9.31E-04 | ~ 2.77E-04 | ~ 2.62E-04 | ~ 1.28E-03 | ~ 1.28E-03 |
| <b>Carbonyls &amp; Glycidol</b>        |                |            |            |            |            |            |            |
| <b>Acetaldehyde</b>                    | mg/mg nicotine | 1.03E-04   | 1.37E-04   | 1.60E-04   | 1.56E-04   | 1.43E-04   | 1.60E-04   |
| <b>Acrolein</b>                        | mg/mg nicotine | 7.06E-05   | ~ 3.88E-05 | ~ 3.86E-05 | ~ 3.65E-05 | ~ 3.54E-05 | 7.06E-05   |
| <b>Diacetyl</b>                        | mg/mg nicotine | ~ 3.48E-06 | ~ 3.73E-05 | ~ 3.43E-06 | ~ 3.52E-05 | ~ 3.57E-05 | ~ 3.73E-05 |
| <b>Formaldehyde</b>                    | mg/mg nicotine | 5.57E-04   | 4.40E-04   | 4.68E-04   | 4.97E-04   | 5.39E-04   | 5.57E-04   |
| <b>Glycidol</b>                        | mg/mg nicotine | 1.15E-04   | 1.31E-04   | 1.23E-04   | 8.56E-05   | 1.61E-04   | 1.61E-04   |
| <b>Acetyl Propionyl</b>                | mg/mg nicotine | ~ 3.43E-06 | ~ 3.42E-06 | ~ 3.39E-06 | ~ 3.20E-06 | ~ 4.29E-06 | ~ 4.29E-06 |
| <b>Butyraldehyde</b>                   | mg/mg nicotine | ~ 3.43E-06 | ~ 3.42E-06 | ~ 3.38E-06 | ~ 3.52E-05 | ~ 3.44E-06 | ~ 3.52E-05 |
| <b>Crotonaldehyde</b>                  | mg/mg nicotine | ~ 5.51E-06 | ~ 5.48E-06 | ~ 5.43E-06 | ~ 5.13E-06 | ~ 4.24E-06 | ~ 5.51E-06 |
| <b>Furfural</b>                        | mg/mg nicotine | ~ 5.63E-06 | ~ 5.61E-06 | ~ 5.56E-06 | ~ 5.25E-06 | ~ 5.88E-06 | ~ 5.88E-06 |
| <b>Nicotine Degradants &amp; TSNAs</b> |                |            |            |            |            |            |            |
| <b>β-Nicotyrine</b>                    | mg/mg nicotine | 5.68E-05   | ~ 3.00E-05 | 1.17E-04   | 6.83E-05   | 1.02E-04   | 1.17E-04   |
| <b>Cotinine</b>                        | mg/mg nicotine | 8.29E-05   | ~ 3.00E-05 | 7.51E-05   | 1.89E-04   | 9.78E-05   | 1.89E-04   |
| <b>Myosmine</b>                        | mg/mg nicotine | 1.16E-04   | 1.52E-04   | 1.72E-04   | 1.82E-04   | 1.88E-04   | 1.88E-04   |
| <b>Nicotine N Oxide</b>                | mg/mg nicotine | 8.49E-05   | ~ 3.00E-05 | 8.41E-05   | 2.51E-04   | 7.43E-05   | 2.51E-04   |
| <b>Nornicotine</b>                     | mg/mg nicotine | 2.14E-04   | 2.67E-04   | 4.69E-04   | 5.91E-04   | 5.53E-04   | 5.91E-04   |
| <b>Anabasine</b>                       | mg/mg nicotine | ~ 2.76E-06 | ~ 3.09E-06 | ~ 2.72E-06 | ~ 2.57E-06 | ~ 3.69E-06 | ~ 3.69E-06 |
| <b>Anatabine</b>                       | mg/mg nicotine | ~ 2.75E-06 | ~ 2.76E-06 | ~ 2.71E-06 | ~ 2.56E-06 | ~ 2.93E-06 | ~ 2.93E-06 |
| <b>NNK</b>                             | mg/mg nicotine | ~ 9.18E-08 | ~ 9.14E-08 | NT         | NT         | NT         | ~ 9.18E-08 |
| <b>NNN</b>                             | mg/mg nicotine | ~ 2.47E-08 | ~ 2.46E-08 | NT         | NT         | NT         | ~ 2.47E-08 |
| <b>Metals</b>                          |                |            |            |            |            |            |            |



|                              |                |            |            |            |            |            |            |
|------------------------------|----------------|------------|------------|------------|------------|------------|------------|
| <b>Arsenic</b>               | mg/mg nicotine | ~ 1.82E-06 | ~ 3.02E-07 | ~ 1.80E-06 | ~ 2.83E-07 | ~ 2.78E-07 | ~ 1.82E-06 |
| <b>Beryllium</b>             | mg/mg nicotine | ~ 6.68E-08 | ~ 6.65E-08 | ~ 6.59E-08 | ~ 6.23E-08 | ~ 6.11E-08 | ~ 6.68E-08 |
| <b>Cadmium</b>               | mg/mg nicotine | ~ 3.04E-08 | ~ 3.02E-08 | ~ 3.00E-08 | ~ 2.83E-08 | ~ 2.78E-08 | ~ 3.04E-08 |
| <b>Chromium</b>              | mg/mg nicotine | ~ 3.04E-07 | ~ 3.02E-07 | ~ 1.80E-06 | ~ 2.83E-07 | ~ 2.78E-07 | ~ 1.80E-06 |
| <b>Cobalt</b>                | mg/mg nicotine | ~ 1.52E-08 | ~ 1.51E-08 | ~ 1.50E-08 | ~ 1.42E-08 | ~ 1.39E-08 | ~ 1.52E-08 |
| <b>Copper</b>                | mg/mg nicotine | ~ 7.59E-07 | ~ 7.56E-07 | ~ 7.49E-07 | ~ 7.08E-07 | ~ 6.95E-07 | ~ 7.59E-07 |
| <b>Gold</b>                  | mg/mg nicotine | ~ 5.16E-06 | ~ 5.14E-06 | ~ 5.09E-06 | ~ 4.81E-06 | ~ 4.72E-06 | ~ 5.16E-06 |
| <b>Iron</b>                  | mg/mg nicotine | ~ 3.04E-06 | ~ 3.02E-06 | ~ 3.00E-06 | ~ 2.83E-06 | ~ 2.78E-06 | ~ 3.04E-06 |
| <b>Lead</b>                  | mg/mg nicotine | ~ 7.59E-08 | ~ 7.56E-08 | ~ 7.49E-08 | ~ 7.08E-08 | ~ 6.95E-08 | ~ 7.59E-08 |
| <b>Nickel</b>                | mg/mg nicotine | ~ 1.52E-07 | ~ 1.51E-07 | ~ 1.50E-07 | ~ 1.42E-07 | ~ 1.39E-07 | ~ 1.52E-07 |
| <b>Selenium</b>              | mg/mg nicotine | ~ 7.26E-07 | ~ 7.23E-07 | ~ 7.16E-07 | ~ 6.77E-07 | ~ 1.08E-07 | ~ 7.26E-07 |
| <b>Silver</b>                | mg/mg nicotine | ~ 3.04E-08 | ~ 3.02E-08 | ~ 3.00E-08 | ~ 2.83E-08 | ~ 2.78E-08 | ~ 3.04E-08 |
| <b>Tin</b>                   | mg/mg nicotine | ~ 3.04E-07 | ~ 3.02E-07 | ~ 1.80E-06 | ~ 1.70E-06 | ~ 2.78E-07 | ~ 1.80E-06 |
| <b>Zinc</b>                  | mg/mg nicotine | ~ 4.56E-06 | ~ 4.54E-06 | ~ 4.49E-06 | ~ 4.25E-06 | ~ 4.17E-06 | ~ 4.56E-06 |
| <b>Organic Acids</b>         |                |            |            |            |            |            |            |
| <b>Benzoic Acid</b>          | mg/mg nicotine | 5.66E-01   | 5.67E-01   | 6.29E-01   | 7.08E-01   | 5.02E-01   | 7.08E-01   |
| <b>Propionic Acid</b>        | mg/mg nicotine | ~ 1.07E-03 | ~ 1.87E-03 | ~ 1.06E-03 | ~ 9.99E-04 | ~ 1.96E-03 | ~ 1.96E-03 |
| <b>VOCs</b>                  |                |            |            |            |            |            |            |
| <b>1,3-butadiene</b>         | mg/mg nicotine | ~ 1.67E-06 | ~ 2.12E-06 | NT         | NT         | NT         | ~ 2.12E-06 |
| <b>Acrylonitrile</b>         | mg/mg nicotine | ~ 1.09E-06 | ~ 7.44E-07 | NT         | NT         | NT         | ~ 1.09E-06 |
| <b>Benzene</b>               | mg/mg nicotine | ~ 1.12E-05 | ~ 1.11E-05 | NT         | NT         | NT         | ~ 1.12E-05 |
| <b>Isoprene</b>              | mg/mg nicotine | ~ 2.57E-06 | ~ 1.71E-06 | NT         | NT         | NT         | ~ 2.57E-06 |
| <b>Propylene Oxide</b>       | mg/mg nicotine | ~ 4.42E-06 | ~ 6.89E-06 | NT         | NT         | NT         | ~ 6.89E-06 |
| <b>Toluene</b>               | mg/mg nicotine | ~ 1.35E-05 | ~ 1.24E-06 | NT         | NT         | NT         | ~ 1.35E-05 |
| <b>Esters &amp; Alcohols</b> |                |            |            |            |            |            |            |
| <b>1-Butanol</b>             | mg/mg nicotine | ~ 5.81E-05 | ~ 6.54E-04 | NT         | NT         | NT         | ~ 6.54E-04 |
| <b>Benzyl Acetate</b>        | mg/mg nicotine | ~ 7.65E-05 | ~ 7.61E-05 | NT         | NT         | NT         | ~ 7.65E-05 |
| <b>Ethyl Acetate</b>         | mg/mg nicotine | ~ 6.09E-05 | ~ 6.06E-05 | NT         | NT         | NT         | ~ 6.09E-05 |
| <b>Ethyl Acetoacetate</b>    | mg/mg nicotine | ~ 1.19E-04 | ~ 1.18E-04 | NT         | NT         | NT         | ~ 1.19E-04 |

|                         |                |            |            |    |    |    |            |
|-------------------------|----------------|------------|------------|----|----|----|------------|
| <b>Isoamyl Acetate</b>  | mg/mg nicotine | ~ 6.15E-05 | ~ 6.13E-05 | NT | NT | NT | ~ 6.15E-05 |
| <b>Isobutyl Acetate</b> | mg/mg nicotine | ~ 6.12E-05 | ~ 6.10E-05 | NT | NT | NT | ~ 6.12E-05 |
| <b>Methyl Acetate</b>   | mg/mg nicotine | ~ 6.34E-05 | ~ 7.00E-04 | NT | NT | NT | ~ 7.00E-04 |

~ = approximated numeric value (see Supplemental Materials Appendix 1A) generated from the corresponding LOD and LOQ (See Supplemental Materials Appendix 1B)

## 1.8 Autumn Tobacco 18 mg/mL Intense Nicotine Normalized Analytical Stability Results

| Parameter/<br>Constituent       | Units          | T0         | T3         | T6         | T9         | T12        | Max        |
|---------------------------------|----------------|------------|------------|------------|------------|------------|------------|
| # of puffs                      | NA             | 80         | 76         | 68         | 72         | 68         | 80         |
| pH                              | NA             | 6.43       | 6.27       | 6.35       | 6.06       | 6.12       | 6.43       |
| <b>Primary Constituents</b>     |                |            |            |            |            |            |            |
| Nicotine                        | mg/mg nicotine | 1.00E+00   | 1.00E+00   | 1.00E+00   | 1.00E+00   | 1.00E+00   | 1.00E+00   |
| Glycerol                        | mg/mg nicotine | 2.62E+01   | 2.59E+01   | 2.52E+01   | 2.50E+01   | 2.47E+01   | 2.62E+01   |
| Propylene Glycol                | mg/mg nicotine | 3.41E+01   | 3.38E+01   | 3.17E+01   | 3.20E+01   | 3.32E+01   | 3.41E+01   |
| Water                           | mg/mg nicotine | 3.14E+00   | 4.61E+00   | 4.01E+00   | 4.57E+00   | 5.42E+00   | 5.42E+00   |
| Menthol                         | mg/mg nicotine | ~ 1.55E-03 | ~ 1.62E-03 | ~ 4.90E-03 | ~ 4.75E-04 | ~ 2.30E-03 | ~ 4.90E-03 |
| Diethylene Glycol               | mg/mg nicotine | ~ 1.42E-03 | ~ 1.49E-03 | ~ 4.21E-04 | ~ 4.36E-04 | ~ 2.10E-03 | ~ 2.10E-03 |
| Ethylene Glycol                 | mg/mg nicotine | ~ 9.89E-04 | ~ 1.04E-03 | ~ 2.93E-04 | ~ 3.04E-04 | ~ 1.47E-03 | ~ 1.47E-03 |
| <b>Carbonyls &amp; Glycidol</b> |                |            |            |            |            |            |            |
| Acetaldehyde                    | mg/mg nicotine | 1.26E-04   | 1.70E-04   | 1.61E-04   | 1.92E-04   | 1.39E-04   | 1.92E-04   |
| Acrolein                        | mg/mg nicotine | 1.27E-04   | ~ 5.03E-05 | ~ 4.09E-05 | ~ 4.94E-05 | ~ 4.72E-05 | 1.27E-04   |
| Diacetyl                        | mg/mg nicotine | ~ 4.72E-05 | ~ 4.84E-05 | ~ 3.91E-05 | ~ 4.77E-05 | ~ 5.80E-06 | ~ 4.84E-05 |
| Formaldehyde                    | mg/mg nicotine | 6.69E-04   | 6.99E-04   | 5.22E-04   | 6.91E-04   | 6.54E-04   | 6.99E-04   |
| Glycidol                        | mg/mg nicotine | 2.49E-04   | 2.19E-04   | 1.78E-04   | 1.44E-04   | 2.70E-04   | 2.70E-04   |
| Acetyl Propionyl                | mg/mg nicotine | ~ 4.23E-06 | ~ 4.44E-06 | ~ 3.59E-06 | ~ 4.79E-05 | ~ 5.71E-06 | ~ 4.79E-05 |
| Butyraldehyde                   | mg/mg nicotine | ~ 4.23E-06 | ~ 4.43E-06 | ~ 3.58E-06 | ~ 4.33E-06 | ~ 4.58E-06 | ~ 4.58E-06 |
| Crotonaldehyde                  | mg/mg nicotine | ~ 6.79E-06 | ~ 7.12E-06 | ~ 5.75E-06 | ~ 6.95E-06 | ~ 5.65E-06 | ~ 7.12E-06 |

|                                        |                |            |            |            |            |            |            |
|----------------------------------------|----------------|------------|------------|------------|------------|------------|------------|
| <b>Furfural</b>                        | mg/mg nicotine | ~ 6.95E-06 | ~ 7.28E-06 | ~ 5.89E-06 | ~ 7.11E-06 | ~ 7.84E-06 | ~ 7.84E-06 |
| <b>Nicotine Degradants &amp; TSNAs</b> |                |            |            |            |            |            |            |
| <b>β-Nicotyrine</b>                    | mg/mg nicotine | ~ 3.73E-05 | ~ 3.90E-05 | 1.17E-04   | 8.57E-05   | 1.07E-04   | 1.17E-04   |
| <b>Cotinine</b>                        | mg/mg nicotine | ~ 3.73E-05 | ~ 3.90E-05 | ~ 3.68E-05 | 2.75E-04   | 1.07E-04   | 2.75E-04   |
| <b>Myosmine</b>                        | mg/mg nicotine | 1.09E-04   | 1.84E-04   | 1.71E-04   | 2.12E-04   | 2.02E-04   | 2.12E-04   |
| <b>Nicotine N Oxide</b>                | mg/mg nicotine | ~ 3.71E-05 | ~ 3.89E-05 | ~ 3.67E-05 | 2.92E-04   | ~ 4.10E-05 | 2.92E-04   |
| <b>Nornicotine</b>                     | mg/mg nicotine | 2.06E-04   | 3.72E-04   | 4.30E-04   | 7.23E-04   | 4.26E-04   | 7.23E-04   |
| <b>Anabasine</b>                       | mg/mg nicotine | ~ 3.40E-06 | ~ 4.01E-06 | ~ 3.37E-06 | ~ 3.48E-06 | ~ 4.92E-06 | ~ 4.92E-06 |
| <b>Anatabine</b>                       | mg/mg nicotine | ~ 3.39E-06 | ~ 3.58E-06 | ~ 3.35E-06 | ~ 3.47E-06 | ~ 3.91E-06 | ~ 3.91E-06 |
| <b>NNK</b>                             | mg/mg nicotine | ~ 9.70E-08 | ~ 1.02E-07 | NT         | NT         | NT         | ~ 1.02E-07 |
| <b>NNN</b>                             | mg/mg nicotine | ~ 2.61E-08 | ~ 1.11E-07 | NT         | NT         | NT         | ~ 1.11E-07 |
| <b>Metals</b>                          |                |            |            |            |            |            |            |
| <b>Arsenic</b>                         | mg/mg nicotine | ~ 3.21E-07 | ~ 3.37E-07 | ~ 1.90E-06 | ~ 3.29E-07 | ~ 3.17E-07 | ~ 1.90E-06 |
| <b>Beryllium</b>                       | mg/mg nicotine | ~ 7.06E-08 | ~ 7.40E-08 | ~ 6.98E-08 | ~ 7.23E-08 | ~ 6.98E-08 | ~ 7.40E-08 |
| <b>Cadmium</b>                         | mg/mg nicotine | ~ 3.21E-08 | ~ 3.37E-08 | ~ 3.17E-08 | ~ 3.29E-08 | ~ 3.17E-08 | ~ 3.37E-08 |
| <b>Chromium</b>                        | mg/mg nicotine | ~ 3.21E-07 | ~ 3.37E-07 | ~ 1.90E-06 | ~ 3.29E-07 | ~ 3.17E-07 | ~ 1.90E-06 |
| <b>Cobalt</b>                          | mg/mg nicotine | ~ 1.60E-08 | ~ 1.68E-08 | ~ 1.59E-08 | ~ 1.64E-08 | ~ 1.59E-08 | ~ 1.68E-08 |
| <b>Copper</b>                          | mg/mg nicotine | ~ 8.02E-07 | ~ 8.41E-07 | ~ 7.93E-07 | ~ 8.21E-07 | ~ 7.94E-07 | ~ 8.41E-07 |
| <b>Gold</b>                            | mg/mg nicotine | ~ 5.46E-06 | ~ 5.72E-06 | ~ 5.39E-06 | ~ 5.59E-06 | ~ 5.40E-06 | ~ 5.72E-06 |
| <b>Iron</b>                            | mg/mg nicotine | ~ 3.21E-06 | ~ 3.37E-06 | ~ 3.17E-06 | ~ 3.29E-06 | ~ 3.17E-06 | ~ 3.37E-06 |
| <b>Lead</b>                            | mg/mg nicotine | ~ 8.02E-08 | ~ 8.41E-08 | ~ 7.93E-08 | ~ 8.21E-08 | ~ 7.94E-08 | ~ 8.41E-08 |
| <b>Nickel</b>                          | mg/mg nicotine | ~ 1.60E-07 | ~ 1.68E-07 | ~ 1.59E-07 | ~ 1.64E-07 | ~ 1.59E-07 | ~ 1.68E-07 |
| <b>Selenium</b>                        | mg/mg nicotine | ~ 7.67E-07 | ~ 8.04E-07 | ~ 7.58E-07 | ~ 7.85E-07 | ~ 7.59E-07 | ~ 8.04E-07 |
| <b>Silver</b>                          | mg/mg nicotine | ~ 3.21E-08 | ~ 3.37E-08 | ~ 3.17E-08 | ~ 3.29E-08 | ~ 3.17E-08 | ~ 3.37E-08 |
| <b>Tin</b>                             | mg/mg nicotine | ~ 3.21E-07 | ~ 2.02E-06 | ~ 1.90E-06 | ~ 1.97E-06 | ~ 3.17E-07 | ~ 2.02E-06 |
| <b>Zinc</b>                            | mg/mg nicotine | ~ 4.81E-06 | ~ 5.05E-06 | ~ 4.76E-06 | ~ 4.93E-06 | ~ 4.76E-06 | ~ 5.05E-06 |
| <b>Organic Acids</b>                   |                |            |            |            |            |            |            |
| <b>Benzoic Acid</b>                    | mg/mg nicotine | 7.47E-01   | 7.67E-01   | 5.83E-01   | 8.34E-01   | 6.23E-01   | 8.34E-01   |
| <b>Propionic Acid</b>                  | mg/mg nicotine | ~ 1.13E-03 | ~ 2.08E-03 | ~ 1.96E-03 | ~ 1.16E-03 | ~ 2.24E-03 | ~ 2.24E-03 |

| VOCs                      |                |            |            |    |    |    |            |
|---------------------------|----------------|------------|------------|----|----|----|------------|
| <b>1,3-butadiene</b>      | mg/mg nicotine | ~ 1.76E-06 | ~ 1.85E-06 | NT | NT | NT | ~ 1.85E-06 |
| <b>Acrylonitrile</b>      | mg/mg nicotine | ~ 1.15E-06 | ~ 1.21E-06 | NT | NT | NT | ~ 1.21E-06 |
| <b>Benzene</b>            | mg/mg nicotine | ~ 1.19E-05 | ~ 1.24E-05 | NT | NT | NT | ~ 1.24E-05 |
| <b>Isoprene</b>           | mg/mg nicotine | ~ 2.71E-06 | ~ 2.85E-06 | NT | NT | NT | ~ 2.85E-06 |
| <b>Propylene Oxide</b>    | mg/mg nicotine | ~ 4.67E-06 | ~ 4.90E-06 | NT | NT | NT | ~ 4.90E-06 |
| <b>Toluene</b>            | mg/mg nicotine | ~ 1.44E-05 | ~ 1.50E-05 | NT | NT | NT | ~ 1.50E-05 |
| Esters & Alcohols         |                |            |            |    |    |    |            |
| <b>1-Butanol</b>          | mg/mg nicotine | ~ 6.86E-04 | ~ 7.26E-04 | NT | NT | NT | ~ 7.26E-04 |
| <b>Benzyl Acetate</b>     | mg/mg nicotine | ~ 8.08E-05 | ~ 8.47E-05 | NT | NT | NT | ~ 8.47E-05 |
| <b>Ethyl Acetate</b>      | mg/mg nicotine | ~ 6.43E-05 | ~ 6.75E-05 | NT | NT | NT | ~ 6.75E-05 |
| <b>Ethyl Acetoacetate</b> | mg/mg nicotine | ~ 1.25E-04 | ~ 1.31E-04 | NT | NT | NT | ~ 1.31E-04 |
| <b>Isoamyl Acetate</b>    | mg/mg nicotine | ~ 6.50E-05 | ~ 6.82E-05 | NT | NT | NT | ~ 6.82E-05 |
| <b>Isobutyl Acetate</b>   | mg/mg nicotine | ~ 6.47E-05 | ~ 6.78E-05 | NT | NT | NT | ~ 6.78E-05 |
| <b>Methyl Acetate</b>     | mg/mg nicotine | ~ 6.70E-05 | ~ 7.03E-05 | NT | NT | NT | ~ 7.03E-05 |

~ = approximated numeric value (see Supplemental Materials Appendix 1A) generated from the corresponding LOD and LOQ (See Supplemental Materials Appendix 1B)

## 1.9 Ruby Menthol 18 mg/mL Non-Intense Nicotine Normalized Analytical Stability Results

| Parameter/<br>Constituent | Units          | T0       | T3       | T6       | T9       | T12      | Max      |
|---------------------------|----------------|----------|----------|----------|----------|----------|----------|
| # of puffs                | NA             | 130      | 127      | 135      | 124      | 124      | 135      |
| pH                        | NA             | 5.90     | 5.60     | 5.90     | 5.70     | 5.62     | 5.90     |
| Primary Constituents      |                |          |          |          |          |          |          |
| <b>Nicotine</b>           | mg/mg nicotine | 1.00E+00 | 1.00E+00 | 1.00E+00 | 1.00E+00 | 1.00E+00 | 1.00E+00 |
| <b>Glycerol</b>           | mg/mg nicotine | 2.59E+01 | 2.60E+01 | 2.43E+01 | 2.43E+01 | 2.46E+01 | 2.60E+01 |
| <b>Propylene Glycol</b>   | mg/mg nicotine | 3.50E+01 | 3.48E+01 | 3.27E+01 | 3.25E+01 | 3.41E+01 | 3.50E+01 |
| <b>Water</b>              | mg/mg nicotine | 2.22E+00 | 4.17E+00 | 3.82E+00 | 3.81E+00 | 8.20E+00 | 8.20E+00 |

|                                        |                |            |            |            |            |            |            |
|----------------------------------------|----------------|------------|------------|------------|------------|------------|------------|
| <b>Menthol</b>                         | mg/mg nicotine | 5.73E-01   | 5.51E-01   | 5.33E-01   | 5.37E-01   | 5.23E-01   | 5.73E-01   |
| <b>Diethylene Glycol</b>               | mg/mg nicotine | ~ 1.34E-03 | ~ 1.39E-03 | ~ 3.69E-04 | ~ 3.69E-04 | ~ 2.02E-03 | ~ 2.02E-03 |
| <b>Ethylene Glycol</b>                 | mg/mg nicotine | ~ 9.30E-04 | ~ 9.70E-04 | ~ 2.57E-04 | ~ 2.57E-04 | ~ 1.41E-03 | ~ 1.41E-03 |
| <b>Carbonyls &amp; Glycidol</b>        |                |            |            |            |            |            |            |
| <b>Acetaldehyde</b>                    | mg/mg nicotine | 2.11E-04   | 2.22E-04   | 2.93E-04   | 2.84E-04   | 2.85E-04   | 2.93E-04   |
| <b>Acrolein</b>                        | mg/mg nicotine | ~ 3.87E-05 | ~ 4.04E-05 | ~ 3.59E-05 | ~ 3.59E-05 | ~ 3.89E-05 | ~ 4.04E-05 |
| <b>Diacetyl</b>                        | mg/mg nicotine | ~ 3.81E-05 | ~ 3.88E-05 | ~ 3.43E-05 | ~ 3.47E-05 | ~ 3.93E-05 | ~ 3.93E-05 |
| <b>Formaldehyde</b>                    | mg/mg nicotine | 5.88E-04   | 5.34E-04   | 6.40E-04   | 6.92E-04   | 8.18E-04   | 8.18E-04   |
| <b>Glycidol</b>                        | mg/mg nicotine | 1.24E-04   | 1.61E-04   | 1.41E-04   | 1.33E-04   | 1.84E-04   | 1.84E-04   |
| <b>Acetyl Propionyl</b>                | mg/mg nicotine | ~ 3.42E-06 | ~ 3.56E-06 | ~ 3.15E-06 | ~ 3.15E-06 | ~ 4.71E-06 | ~ 4.71E-06 |
| <b>Butyraldehyde</b>                   | mg/mg nicotine | ~ 3.41E-06 | ~ 3.56E-06 | ~ 3.15E-06 | ~ 3.15E-06 | ~ 3.78E-06 | ~ 3.78E-06 |
| <b>Crotonaldehyde</b>                  | mg/mg nicotine | ~ 5.48E-06 | ~ 5.71E-06 | ~ 5.05E-06 | ~ 5.05E-06 | ~ 4.65E-06 | ~ 5.71E-06 |
| <b>Furfural</b>                        | mg/mg nicotine | ~ 5.60E-06 | ~ 5.84E-06 | ~ 5.17E-06 | ~ 5.17E-06 | ~ 6.46E-06 | ~ 6.46E-06 |
| <b>Nicotine Degradants &amp; TSNAs</b> |                |            |            |            |            |            |            |
| <b>β-Nicotyrine</b>                    | mg/mg nicotine | 9.08E-05   | 9.39E-05   | 2.07E-04   | 1.67E-04   | 1.62E-04   | 2.07E-04   |
| <b>Cotinine</b>                        | mg/mg nicotine | 6.27E-05   | ~ 3.13E-05 | 1.23E-04   | 2.42E-04   | 1.56E-04   | 2.42E-04   |
| <b>Myosmine</b>                        | mg/mg nicotine | 1.22E-04   | 1.96E-04   | 2.60E-04   | 2.90E-04   | 3.01E-04   | 3.01E-04   |
| <b>Nicotine N Oxide</b>                | mg/mg nicotine | 5.90E-05   | 6.75E-05   | 5.08E-05   | 2.56E-04   | ~ 3.38E-05 | 2.56E-04   |
| <b>Nornicotine</b>                     | mg/mg nicotine | 1.81E-04   | 3.78E-04   | 4.46E-04   | 6.68E-04   | 6.40E-04   | 6.68E-04   |
| <b>Anabasine</b>                       | mg/mg nicotine | ~ 2.75E-06 | ~ 3.22E-06 | ~ 2.53E-06 | ~ 2.53E-06 | ~ 4.05E-06 | ~ 4.05E-06 |
| <b>Anatabine</b>                       | mg/mg nicotine | ~ 2.73E-06 | ~ 2.87E-06 | ~ 2.52E-06 | ~ 2.52E-06 | ~ 3.22E-06 | ~ 3.22E-06 |
| <b>NNK</b>                             | mg/mg nicotine | ~ 9.13E-08 | ~ 9.52E-08 | NT         | NT         | NT         | ~ 9.52E-08 |
| <b>NNN</b>                             | mg/mg nicotine | 3.53E-07   | ~ 1.04E-07 | NT         | NT         | NT         | 3.53E-07   |
| <b>Metals</b>                          |                |            |            |            |            |            |            |
| <b>Arsenic</b>                         | mg/mg nicotine | ~ 3.02E-07 | ~ 3.15E-07 | ~ 2.79E-07 | ~ 2.79E-07 | ~ 3.05E-07 | ~ 3.15E-07 |
| <b>Beryllium</b>                       | mg/mg nicotine | ~ 6.65E-08 | ~ 6.93E-08 | ~ 6.13E-08 | ~ 6.13E-08 | ~ 6.71E-08 | ~ 6.93E-08 |
| <b>Cadmium</b>                         | mg/mg nicotine | ~ 3.02E-08 | ~ 3.15E-08 | ~ 2.79E-08 | ~ 2.79E-08 | ~ 3.05E-08 | ~ 3.15E-08 |
| <b>Chromium</b>                        | mg/mg nicotine | ~ 3.02E-07 | ~ 3.15E-07 | ~ 2.79E-07 | ~ 2.79E-07 | ~ 3.05E-07 | ~ 3.15E-07 |
| <b>Cobalt</b>                          | mg/mg nicotine | ~ 1.51E-08 | ~ 1.57E-08 | ~ 1.39E-08 | ~ 1.39E-08 | ~ 1.53E-08 | ~ 1.57E-08 |

|                              |                |            |            |            |            |            |            |
|------------------------------|----------------|------------|------------|------------|------------|------------|------------|
| <b>Copper</b>                | mg/mg nicotine | ~ 7.55E-07 | ~ 7.87E-07 | ~ 6.96E-07 | ~ 6.97E-07 | ~ 7.63E-07 | ~ 7.87E-07 |
| <b>Gold</b>                  | mg/mg nicotine | ~ 5.14E-06 | ~ 5.35E-06 | ~ 4.74E-06 | ~ 4.74E-06 | ~ 5.19E-06 | ~ 5.35E-06 |
| <b>Iron</b>                  | mg/mg nicotine | ~ 3.02E-06 | ~ 3.15E-06 | ~ 2.79E-06 | ~ 2.79E-06 | ~ 3.05E-06 | ~ 3.15E-06 |
| <b>Lead</b>                  | mg/mg nicotine | ~ 7.55E-08 | ~ 7.87E-08 | ~ 6.96E-08 | ~ 6.97E-08 | ~ 7.63E-08 | ~ 7.87E-08 |
| <b>Nickel</b>                | mg/mg nicotine | ~ 1.51E-07 | ~ 1.57E-07 | ~ 1.39E-07 | ~ 1.39E-07 | ~ 1.53E-07 | ~ 1.57E-07 |
| <b>Selenium</b>              | mg/mg nicotine | ~ 7.22E-07 | ~ 7.52E-07 | ~ 6.66E-07 | ~ 6.66E-07 | ~ 7.29E-07 | ~ 7.52E-07 |
| <b>Silver</b>                | mg/mg nicotine | ~ 3.02E-08 | ~ 3.15E-08 | ~ 1.67E-07 | ~ 2.79E-08 | ~ 3.05E-08 | ~ 1.67E-07 |
| <b>Tin</b>                   | mg/mg nicotine | ~ 3.02E-07 | ~ 3.15E-07 | ~ 2.79E-07 | ~ 2.79E-07 | ~ 3.05E-07 | ~ 3.15E-07 |
| <b>Zinc</b>                  | mg/mg nicotine | ~ 4.53E-06 | ~ 4.72E-06 | ~ 4.18E-06 | ~ 4.18E-06 | ~ 4.58E-06 | ~ 4.72E-06 |
| <b>Organic Acids</b>         |                |            |            |            |            |            |            |
| <b>Benzoic Acid</b>          | mg/mg nicotine | 5.03E-01   | 7.19E-01   | 6.42E-01   | 6.68E-01   | 5.72E-01   | 7.19E-01   |
| <b>Propionic Acid</b>        | mg/mg nicotine | ~ 1.39E-03 | ~ 1.95E-03 | ~ 9.83E-04 | ~ 9.83E-04 | ~ 2.15E-03 | ~ 2.15E-03 |
| <b>VOCs</b>                  |                |            |            |            |            |            |            |
| <b>1,3-butadiene</b>         | mg/mg nicotine | ~ 1.66E-06 | ~ 2.20E-06 | NT         | NT         | NT         | ~ 2.20E-06 |
| <b>Acrylonitrile</b>         | mg/mg nicotine | ~ 1.09E-06 | ~ 7.75E-07 | NT         | NT         | NT         | ~ 1.09E-06 |
| <b>Benzene</b>               | mg/mg nicotine | ~ 1.11E-05 | ~ 1.15E-05 | NT         | NT         | NT         | ~ 1.15E-05 |
| <b>Isoprene</b>              | mg/mg nicotine | ~ 2.55E-06 | ~ 1.78E-06 | NT         | NT         | NT         | ~ 2.55E-06 |
| <b>Propylene Oxide</b>       | mg/mg nicotine | ~ 4.40E-06 | ~ 7.17E-06 | NT         | NT         | NT         | ~ 7.17E-06 |
| <b>Toluene</b>               | mg/mg nicotine | ~ 1.35E-05 | ~ 1.29E-06 | NT         | NT         | NT         | ~ 1.35E-05 |
| <b>Esters &amp; Alcohols</b> |                |            |            |            |            |            |            |
| <b>1-Butanol</b>             | mg/mg nicotine | ~ 5.78E-05 | ~ 6.02E-05 | NT         | NT         | NT         | ~ 6.02E-05 |
| <b>Benzyl Acetate</b>        | mg/mg nicotine | ~ 7.60E-05 | ~ 7.92E-05 | NT         | NT         | NT         | ~ 7.92E-05 |
| <b>Ethyl Acetate</b>         | mg/mg nicotine | ~ 6.06E-05 | ~ 6.31E-05 | NT         | NT         | NT         | ~ 6.31E-05 |
| <b>Ethyl Acetoacetate</b>    | mg/mg nicotine | ~ 1.18E-04 | ~ 1.23E-04 | NT         | NT         | NT         | ~ 1.23E-04 |
| <b>Isoamyl Acetate</b>       | mg/mg nicotine | ~ 6.12E-05 | ~ 6.38E-05 | NT         | NT         | NT         | ~ 6.38E-05 |
| <b>Isobutyl Acetate</b>      | mg/mg nicotine | ~ 6.09E-05 | ~ 6.35E-05 | NT         | NT         | NT         | ~ 6.35E-05 |
| <b>Methyl Acetate</b>        | mg/mg nicotine | ~ 6.31E-05 | ~ 7.29E-04 | NT         | NT         | NT         | ~ 7.29E-04 |

~ = approximated numeric value (see Supplemental Materials Appendix 1A) generated from the corresponding LOD and LOQ (See Supplemental Materials Appendix 1B)

### 1.10 Ruby Menthol 18 mg/mL Intense Nicotine Normalized Analytical Stability Results

| Parameter/<br>Constituent              | Units          | T0         | T3         | T6         | T9         | T12        | Max        |
|----------------------------------------|----------------|------------|------------|------------|------------|------------|------------|
| # of puffs                             | NA             | 90         | 76         | 79         | 85         | 73         | 90         |
| pH                                     | NA             | 6.09       | 5.96       | 5.89       | 5.61       | 5.68       | 6.09       |
| <b>Primary Constituents</b>            |                |            |            |            |            |            |            |
| Nicotine                               | mg/mg nicotine | 1.00E+00   | 1.00E+00   | 1.00E+00   | 1.00E+00   | 1.00E+00   | 1.00E+00   |
| Glycerol                               | mg/mg nicotine | 2.62E+01   | 2.59E+01   | 2.48E+01   | 2.38E+01   | 2.48E+01   | 2.62E+01   |
| Propylene Glycol                       | mg/mg nicotine | 3.50E+01   | 3.48E+01   | 3.22E+01   | 3.22E+01   | 3.44E+01   | 3.50E+01   |
| Water                                  | mg/mg nicotine | 2.97E+00   | 3.86E+00   | 4.02E+00   | 3.87E+00   | 6.18E+00   | 6.18E+00   |
| Menthol                                | mg/mg nicotine | 5.58E-01   | 5.47E-01   | 5.30E-01   | 5.17E-01   | 5.20E-01   | 5.58E-01   |
| Diethylene Glycol                      | mg/mg nicotine | ~ 1.51E-03 | ~ 1.47E-03 | ~ 3.95E-04 | ~ 3.54E-04 | ~ 2.09E-03 | ~ 2.09E-03 |
| Ethylene Glycol                        | mg/mg nicotine | ~ 1.05E-03 | ~ 1.03E-03 | ~ 2.75E-04 | ~ 2.47E-04 | ~ 1.46E-03 | ~ 1.46E-03 |
| <b>Carbonyls &amp; Glycidol</b>        |                |            |            |            |            |            |            |
| Acetaldehyde                           | mg/mg nicotine | 2.61E-04   | 2.97E-04   | 3.23E-04   | 3.62E-04   | 2.97E-04   | 3.62E-04   |
| Acrolein                               | mg/mg nicotine | 1.25E-04   | ~ 4.99E-05 | 6.82E-05   | ~ 4.02E-05 | ~ 4.68E-05 | 1.25E-04   |
| Diacetyl                               | mg/mg nicotine | ~ 5.03E-05 | ~ 4.79E-05 | ~ 3.67E-05 | ~ 3.88E-05 | ~ 4.73E-05 | ~ 5.03E-05 |
| Formaldehyde                           | mg/mg nicotine | 7.08E-04   | 7.44E-04   | 6.94E-04   | 8.32E-04   | 9.31E-04   | 9.31E-04   |
| Glycidol                               | mg/mg nicotine | 3.21E-04   | 2.00E-04   | 2.22E-04   | 1.68E-04   | 3.04E-04   | 3.21E-04   |
| Acetyl Propionyl                       | mg/mg nicotine | ~ 4.51E-06 | ~ 4.40E-06 | ~ 3.37E-06 | ~ 3.53E-06 | ~ 5.67E-06 | ~ 5.67E-06 |
| Butyraldehyde                          | mg/mg nicotine | ~ 4.51E-06 | ~ 4.39E-06 | ~ 3.37E-06 | ~ 3.52E-06 | ~ 4.55E-06 | ~ 4.55E-06 |
| Crotonaldehyde                         | mg/mg nicotine | ~ 7.24E-06 | ~ 7.05E-06 | ~ 5.40E-06 | ~ 5.65E-06 | ~ 5.60E-06 | ~ 7.24E-06 |
| Furfural                               | mg/mg nicotine | ~ 7.41E-06 | ~ 7.21E-06 | ~ 5.53E-06 | ~ 5.78E-06 | ~ 7.78E-06 | ~ 7.78E-06 |
| <b>Nicotine Degradants &amp; TSNAs</b> |                |            |            |            |            |            |            |
| β-Nicotyrine                           | mg/mg nicotine | ~ 3.97E-05 | 1.30E-04   | 2.44E-04   | 2.94E-04   | 2.86E-04   | 2.94E-04   |
| Cotinine                               | mg/mg nicotine | 7.36E-05   | ~ 3.86E-05 | 1.24E-04   | 2.65E-04   | 1.68E-04   | 2.65E-04   |
| Myosmine                               | mg/mg nicotine | 1.21E-04   | 2.31E-04   | 2.71E-04   | 3.21E-04   | 3.03E-04   | 3.21E-04   |

|                         |                |            |            |            |            |            |            |
|-------------------------|----------------|------------|------------|------------|------------|------------|------------|
| <b>Nicotine N Oxide</b> | mg/mg nicotine | ~ 3.96E-05 | ~ 3.86E-05 | ~ 3.45E-05 | 2.35E-04   | ~ 4.07E-05 | 2.35E-04   |
| <b>Nornicotine</b>      | mg/mg nicotine | 1.93E-04   | 3.40E-04   | 4.85E-04   | 8.86E-04   | 7.34E-04   | 8.86E-04   |
| <b>Anabasine</b>        | mg/mg nicotine | ~ 3.63E-06 | ~ 3.97E-06 | ~ 3.16E-06 | ~ 2.84E-06 | ~ 4.88E-06 | ~ 4.88E-06 |
| <b>Anatabine</b>        | mg/mg nicotine | ~ 3.61E-06 | ~ 3.55E-06 | ~ 3.15E-06 | ~ 2.82E-06 | ~ 3.88E-06 | ~ 3.88E-06 |
| <b>NNK</b>              | mg/mg nicotine | ~ 1.03E-07 | ~ 1.01E-07 | NT         | NT         | NT         | ~ 1.03E-07 |
| <b>NNN</b>              | mg/mg nicotine | 4.46E-07   | 2.60E-07   | NT         | NT         | NT         | 4.46E-07   |
| <b>Metals</b>           |                |            |            |            |            |            |            |
| <b>Arsenic</b>          | mg/mg nicotine | ~ 3.42E-07 | ~ 3.33E-07 | ~ 2.98E-07 | ~ 2.67E-07 | ~ 3.15E-07 | ~ 3.42E-07 |
| <b>Beryllium</b>        | mg/mg nicotine | ~ 7.53E-08 | ~ 7.33E-08 | ~ 6.56E-08 | ~ 5.88E-08 | ~ 6.93E-08 | ~ 7.53E-08 |
| <b>Cadmium</b>          | mg/mg nicotine | ~ 3.42E-08 | ~ 3.33E-08 | ~ 2.98E-08 | ~ 2.67E-08 | ~ 3.15E-08 | ~ 3.42E-08 |
| <b>Chromium</b>         | mg/mg nicotine | ~ 3.42E-07 | ~ 3.33E-07 | ~ 2.98E-07 | ~ 2.67E-07 | ~ 3.15E-07 | ~ 3.42E-07 |
| <b>Cobalt</b>           | mg/mg nicotine | ~ 1.71E-08 | ~ 1.67E-08 | ~ 1.49E-08 | ~ 1.34E-08 | ~ 1.58E-08 | ~ 1.71E-08 |
| <b>Copper</b>           | mg/mg nicotine | ~ 8.56E-07 | ~ 8.33E-07 | ~ 7.45E-07 | ~ 6.68E-07 | ~ 7.88E-07 | ~ 8.56E-07 |
| <b>Gold</b>             | mg/mg nicotine | ~ 5.82E-06 | ~ 5.67E-06 | ~ 5.07E-06 | ~ 4.54E-06 | ~ 5.36E-06 | ~ 5.82E-06 |
| <b>Iron</b>             | mg/mg nicotine | ~ 3.42E-06 | ~ 3.33E-06 | ~ 2.98E-06 | ~ 2.67E-06 | ~ 3.15E-06 | ~ 3.42E-06 |
| <b>Lead</b>             | mg/mg nicotine | ~ 8.56E-08 | ~ 4.17E-07 | ~ 7.45E-08 | ~ 6.68E-08 | ~ 7.88E-08 | ~ 4.17E-07 |
| <b>Nickel</b>           | mg/mg nicotine | ~ 1.71E-07 | ~ 1.67E-07 | ~ 1.49E-07 | ~ 1.34E-07 | ~ 1.58E-07 | ~ 1.71E-07 |
| <b>Selenium</b>         | mg/mg nicotine | ~ 8.18E-07 | ~ 7.97E-07 | ~ 7.12E-07 | ~ 6.39E-07 | ~ 7.53E-07 | ~ 8.18E-07 |
| <b>Silver</b>           | mg/mg nicotine | ~ 3.42E-08 | ~ 3.33E-08 | ~ 1.79E-07 | ~ 2.67E-08 | ~ 3.15E-08 | ~ 1.79E-07 |
| <b>Tin</b>              | mg/mg nicotine | ~ 3.42E-07 | ~ 2.00E-06 | ~ 2.98E-07 | ~ 2.67E-07 | ~ 3.15E-07 | ~ 2.00E-06 |
| <b>Zinc</b>             | mg/mg nicotine | ~ 5.13E-06 | ~ 5.00E-06 | ~ 4.47E-06 | ~ 4.01E-06 | ~ 4.73E-06 | ~ 5.13E-06 |
| <b>Organic Acids</b>    |                |            |            |            |            |            |            |
| <b>Benzoic Acid</b>     | mg/mg nicotine | 8.02E-01   | 7.94E-01   | 6.24E-01   | 7.45E-01   | 5.56E-01   | 8.02E-01   |
| <b>Propionic Acid</b>   | mg/mg nicotine | ~ 2.12E-03 | ~ 2.06E-03 | ~ 1.84E-03 | ~ 1.35E-03 | ~ 2.22E-03 | ~ 2.22E-03 |
| <b>VOCs</b>             |                |            |            |            |            |            |            |
| <b>1,3-butadiene</b>    | mg/mg nicotine | ~ 1.88E-06 | ~ 1.83E-06 | NT         | NT         | NT         | ~ 1.88E-06 |
| <b>Acrylonitrile</b>    | mg/mg nicotine | ~ 1.23E-06 | ~ 1.20E-06 | NT         | NT         | NT         | ~ 1.23E-06 |
| <b>Benzene</b>          | mg/mg nicotine | ~ 1.27E-05 | ~ 1.23E-05 | NT         | NT         | NT         | ~ 1.27E-05 |



|                              |                |            |            |    |    |    |            |
|------------------------------|----------------|------------|------------|----|----|----|------------|
| <b>Isoprene</b>              | mg/mg nicotine | ~ 2.89E-06 | ~ 2.82E-06 | NT | NT | NT | ~ 2.89E-06 |
| <b>Propylene Oxide</b>       | mg/mg nicotine | ~ 4.98E-06 | ~ 4.85E-06 | NT | NT | NT | ~ 4.98E-06 |
| <b>Toluene</b>               | mg/mg nicotine | ~ 1.53E-05 | ~ 1.48E-05 | NT | NT | NT | ~ 1.53E-05 |
| <b>Esters &amp; Alcohols</b> |                |            |            |    |    |    |            |
| <b>1-Butanol</b>             | mg/mg nicotine | ~ 6.55E-05 | ~ 6.38E-05 | NT | NT | NT | ~ 6.55E-05 |
| <b>Benzyl Acetate</b>        | mg/mg nicotine | ~ 8.62E-05 | ~ 8.39E-05 | NT | NT | NT | ~ 8.62E-05 |
| <b>Ethyl Acetate</b>         | mg/mg nicotine | ~ 6.86E-05 | ~ 6.68E-05 | NT | NT | NT | ~ 6.86E-05 |
| <b>Ethyl Acetoacetate</b>    | mg/mg nicotine | ~ 1.34E-04 | ~ 1.30E-04 | NT | NT | NT | ~ 1.34E-04 |
| <b>Isoamyl Acetate</b>       | mg/mg nicotine | ~ 6.93E-05 | ~ 6.75E-05 | NT | NT | NT | ~ 6.93E-05 |
| <b>Isobutyl Acetate</b>      | mg/mg nicotine | ~ 6.90E-05 | ~ 6.72E-05 | NT | NT | NT | ~ 6.90E-05 |
| <b>Methyl Acetate</b>        | mg/mg nicotine | ~ 7.15E-05 | ~ 8.02E-04 | NT | NT | NT | ~ 8.02E-04 |

~ = approximated numeric value (see Supplemental Materials Appendix 1A) generated from the corresponding LOD and LOQ (See Supplemental Materials Appendix 1B)

### 1.11 Summer Menthol 18 mg/mL Non-Intense Nicotine Normalized Analytical Stability Results

| Parameter/<br>Constituent       | Units          | T0         | T3         | T6         | T9         | T12        | Max        |
|---------------------------------|----------------|------------|------------|------------|------------|------------|------------|
| <b># of puffs</b>               | NA             | 126        | 127        | 138        | 127        | 117        | 138        |
| <b>pH</b>                       | NA             | 6.42       | 6.31       | 6.46       | 6.29       | 6.28       | 6.46       |
| <b>Primary Constituents</b>     |                |            |            |            |            |            |            |
| <b>Nicotine</b>                 | mg/mg nicotine | 1.00E+00   | 1.00E+00   | 1.00E+00   | 1.00E+00   | 1.00E+00   | 1.00E+00   |
| <b>Glycerol</b>                 | mg/mg nicotine | 2.57E+01   | 2.57E+01   | 2.37E+01   | 2.33E+01   | 2.42E+01   | 2.57E+01   |
| <b>Propylene Glycol</b>         | mg/mg nicotine | 3.34E+01   | 3.32E+01   | 3.13E+01   | 3.08E+01   | 3.25E+01   | 3.34E+01   |
| <b>Water</b>                    | mg/mg nicotine | 2.50E+00   | 4.31E+00   | 4.32E+00   | 4.19E+00   | 8.38E+00   | 8.38E+00   |
| <b>Menthol</b>                  | mg/mg nicotine | 5.65E-01   | 5.43E-01   | 5.24E-01   | 5.26E-01   | 5.23E-01   | 5.65E-01   |
| <b>Diethylene Glycol</b>        | mg/mg nicotine | ~ 1.32E-03 | ~ 1.37E-03 | ~ 3.56E-04 | ~ 3.50E-04 | ~ 2.09E-03 | ~ 2.09E-03 |
| <b>Ethylene Glycol</b>          | mg/mg nicotine | ~ 9.18E-04 | ~ 9.54E-04 | ~ 2.48E-04 | ~ 2.44E-04 | ~ 1.46E-03 | ~ 1.46E-03 |
| <b>Carbonyls &amp; Glycidol</b> |                |            |            |            |            |            |            |

|                                        |                |            |            |            |            |            |            |
|----------------------------------------|----------------|------------|------------|------------|------------|------------|------------|
| <b>Acetaldehyde</b>                    | mg/mg nicotine | 7.62E-05   | 9.50E-05   | 9.51E-05   | 9.13E-05   | 1.12E-04   | 1.12E-04   |
| <b>Acrolein</b>                        | mg/mg nicotine | ~ 3.82E-05 | ~ 3.97E-05 | ~ 3.46E-05 | ~ 3.40E-05 | ~ 4.02E-05 | ~ 4.02E-05 |
| <b>Diacetyl</b>                        | mg/mg nicotine | ~ 3.42E-06 | ~ 3.82E-05 | ~ 3.07E-06 | ~ 3.28E-05 | ~ 4.06E-05 | ~ 4.06E-05 |
| <b>Formaldehyde</b>                    | mg/mg nicotine | 4.90E-04   | 4.00E-04   | 4.26E-04   | 4.08E-04   | 5.38E-04   | 5.38E-04   |
| <b>Glycidol</b>                        | mg/mg nicotine | 1.09E-04   | 1.17E-04   | 1.00E-04   | 9.36E-05   | 1.12E-04   | 1.17E-04   |
| <b>Acetyl Propionyl</b>                | mg/mg nicotine | ~ 3.37E-06 | ~ 3.50E-06 | ~ 3.03E-06 | ~ 3.30E-05 | ~ 4.87E-06 | ~ 3.30E-05 |
| <b>Butyraldehyde</b>                   | mg/mg nicotine | ~ 3.37E-06 | ~ 3.50E-06 | ~ 3.03E-06 | ~ 2.98E-06 | ~ 3.91E-06 | ~ 3.91E-06 |
| <b>Crotonaldehyde</b>                  | mg/mg nicotine | ~ 5.40E-06 | ~ 5.62E-06 | ~ 4.86E-06 | ~ 4.78E-06 | ~ 4.81E-06 | ~ 5.62E-06 |
| <b>Furfural</b>                        | mg/mg nicotine | ~ 5.53E-06 | ~ 5.75E-06 | ~ 4.98E-06 | ~ 4.89E-06 | ~ 6.68E-06 | ~ 6.68E-06 |
| <b>Nicotine Degradants &amp; TSNAs</b> |                |            |            |            |            |            |            |
| <b>β-Nicotyrine</b>                    | mg/mg nicotine | ~ 2.97E-05 | ~ 3.08E-05 | 7.87E-05   | 5.43E-05   | ~ 3.09E-05 | 7.87E-05   |
| <b>Cotinine</b>                        | mg/mg nicotine | ~ 2.97E-05 | ~ 2.74E-06 | ~ 2.67E-05 | 1.18E-04   | ~ 3.44E-05 | 1.18E-04   |
| <b>Myosmine</b>                        | mg/mg nicotine | ~ 2.96E-05 | 8.95E-05   | 8.50E-05   | 9.55E-05   | 1.13E-04   | 1.13E-04   |
| <b>Nicotine N Oxide</b>                | mg/mg nicotine | 9.65E-05   | ~ 3.07E-05 | 5.04E-05   | 1.86E-04   | ~ 3.50E-05 | 1.86E-04   |
| <b>Nornicotine</b>                     | mg/mg nicotine | 1.40E-04   | 2.56E-04   | 3.08E-04   | 4.54E-04   | 4.14E-04   | 4.54E-04   |
| <b>Anabasine</b>                       | mg/mg nicotine | ~ 2.71E-06 | ~ 3.16E-06 | ~ 2.44E-06 | ~ 2.40E-06 | ~ 4.19E-06 | ~ 4.19E-06 |
| <b>Anatabine</b>                       | mg/mg nicotine | ~ 2.70E-06 | ~ 2.83E-06 | ~ 2.43E-06 | ~ 2.39E-06 | ~ 3.33E-06 | ~ 3.33E-06 |
| <b>NNK</b>                             | mg/mg nicotine | ~ 9.01E-08 | ~ 9.37E-08 | NT         | NT         | NT         | ~ 9.37E-08 |
| <b>NNN</b>                             | mg/mg nicotine | ~ 2.42E-08 | ~ 2.52E-08 | NT         | NT         | NT         | ~ 2.52E-08 |
| <b>Metals</b>                          |                |            |            |            |            |            |            |
| <b>Arsenic</b>                         | mg/mg nicotine | ~ 2.98E-07 | ~ 3.10E-07 | ~ 2.68E-07 | ~ 2.64E-07 | ~ 3.16E-07 | ~ 3.16E-07 |
| <b>Beryllium</b>                       | mg/mg nicotine | ~ 6.56E-08 | ~ 6.82E-08 | ~ 5.90E-08 | ~ 5.80E-08 | ~ 6.95E-08 | ~ 6.95E-08 |
| <b>Cadmium</b>                         | mg/mg nicotine | ~ 2.98E-08 | ~ 3.10E-08 | ~ 2.68E-08 | ~ 2.64E-08 | ~ 3.16E-08 | ~ 3.16E-08 |
| <b>Chromium</b>                        | mg/mg nicotine | ~ 2.98E-07 | ~ 3.10E-07 | ~ 2.68E-07 | ~ 2.64E-07 | ~ 3.16E-07 | ~ 3.16E-07 |
| <b>Cobalt</b>                          | mg/mg nicotine | ~ 1.49E-08 | ~ 1.55E-08 | ~ 1.34E-08 | ~ 1.32E-08 | ~ 1.58E-08 | ~ 1.58E-08 |
| <b>Copper</b>                          | mg/mg nicotine | ~ 7.45E-07 | ~ 7.75E-07 | ~ 6.71E-07 | ~ 6.60E-07 | ~ 7.89E-07 | ~ 7.89E-07 |
| <b>Gold</b>                            | mg/mg nicotine | ~ 5.07E-06 | ~ 5.27E-06 | ~ 4.56E-06 | ~ 4.48E-06 | ~ 5.37E-06 | ~ 5.37E-06 |
| <b>Iron</b>                            | mg/mg nicotine | ~ 2.98E-06 | ~ 3.10E-06 | ~ 2.68E-06 | ~ 2.64E-06 | ~ 3.16E-06 | ~ 3.16E-06 |

|                              |                |            |            |            |            |            |            |
|------------------------------|----------------|------------|------------|------------|------------|------------|------------|
| <b>Lead</b>                  | mg/mg nicotine | ~ 7.45E-08 | ~ 7.75E-08 | ~ 6.71E-08 | ~ 6.60E-08 | ~ 7.89E-08 | ~ 7.89E-08 |
| <b>Nickel</b>                | mg/mg nicotine | ~ 1.49E-07 | ~ 1.55E-07 | ~ 1.34E-07 | ~ 1.32E-07 | ~ 1.58E-07 | ~ 1.58E-07 |
| <b>Selenium</b>              | mg/mg nicotine | ~ 7.13E-07 | ~ 7.41E-07 | ~ 6.41E-07 | ~ 1.03E-07 | ~ 1.23E-07 | ~ 7.41E-07 |
| <b>Silver</b>                | mg/mg nicotine | ~ 2.98E-08 | ~ 3.10E-08 | ~ 1.61E-07 | ~ 2.64E-08 | ~ 3.16E-08 | ~ 1.61E-07 |
| <b>Tin</b>                   | mg/mg nicotine | ~ 2.98E-07 | ~ 3.10E-07 | ~ 2.68E-07 | ~ 2.64E-07 | ~ 3.16E-07 | ~ 3.16E-07 |
| <b>Zinc</b>                  | mg/mg nicotine | ~ 1.49E-05 | ~ 4.65E-06 | ~ 4.02E-06 | ~ 3.96E-06 | ~ 4.74E-06 | ~ 1.49E-05 |
| <b>Organic Acids</b>         |                |            |            |            |            |            |            |
| <b>Benzoic Acid</b>          | mg/mg nicotine | 5.01E-01   | 6.87E-01   | 5.84E-01   | 6.80E-01   | 5.77E-01   | 6.87E-01   |
| <b>Propionic Acid</b>        | mg/mg nicotine | ~ 1.38E-03 | ~ 1.92E-03 | ~ 9.46E-04 | ~ 1.06E-03 | ~ 2.23E-03 | ~ 2.23E-03 |
| <b>VOCs</b>                  |                |            |            |            |            |            |            |
| <b>1,3-butadiene</b>         | mg/mg nicotine | ~ 1.64E-06 | ~ 2.17E-06 | NT         | NT         | NT         | ~ 2.17E-06 |
| <b>Acrylonitrile</b>         | mg/mg nicotine | ~ 1.07E-06 | ~ 7.62E-07 | NT         | NT         | NT         | ~ 1.07E-06 |
| <b>Benzene</b>               | mg/mg nicotine | ~ 1.10E-05 | ~ 1.13E-05 | NT         | NT         | NT         | ~ 1.13E-05 |
| <b>Isoprene</b>              | mg/mg nicotine | ~ 2.52E-06 | ~ 1.75E-06 | NT         | NT         | NT         | ~ 2.52E-06 |
| <b>Propylene Oxide</b>       | mg/mg nicotine | ~ 4.34E-06 | ~ 7.06E-06 | NT         | NT         | NT         | ~ 7.06E-06 |
| <b>Toluene</b>               | mg/mg nicotine | ~ 1.33E-05 | ~ 1.27E-06 | NT         | NT         | NT         | ~ 1.33E-05 |
| <b>Esters &amp; Alcohols</b> |                |            |            |            |            |            |            |
| <b>1-Butanol</b>             | mg/mg nicotine | ~ 5.70E-05 | ~ 5.93E-05 | NT         | NT         | NT         | ~ 5.93E-05 |
| <b>Benzyl Acetate</b>        | mg/mg nicotine | ~ 7.51E-05 | ~ 7.80E-05 | NT         | NT         | NT         | ~ 7.80E-05 |
| <b>Ethyl Acetate</b>         | mg/mg nicotine | 1.02E-02   | 8.11E-03   | NT         | NT         | NT         | 1.02E-02   |
| <b>Ethyl Acetoacetate</b>    | mg/mg nicotine | ~ 1.16E-04 | ~ 1.21E-04 | NT         | NT         | NT         | ~ 1.21E-04 |
| <b>Isoamyl Acetate</b>       | mg/mg nicotine | ~ 6.04E-05 | ~ 6.28E-05 | NT         | NT         | NT         | ~ 6.28E-05 |
| <b>Isobutyl Acetate</b>      | mg/mg nicotine | ~ 6.01E-05 | ~ 6.25E-05 | NT         | NT         | NT         | ~ 6.25E-05 |
| <b>Methyl Acetate</b>        | mg/mg nicotine | ~ 6.23E-05 | ~ 7.18E-04 | NT         | NT         | NT         | ~ 7.18E-04 |

~ = approximated numeric value (see Supplemental Materials Appendix 1A) generated from the corresponding LOD and LOQ (See Supplemental Materials Appendix 1B)

## 1.12 Summer Menthol 18 mg/mL Intense Nicotine Normalized Analytical Stability Results

| Parameter/<br>Constituent              | Units          | T0         | T3         | T6         | T9         | T12        | Max        |
|----------------------------------------|----------------|------------|------------|------------|------------|------------|------------|
| # of puffs                             | NA             | 86         | 80         | 74         | 86         | 69         | 86         |
| pH                                     | NA             | 6.40       | 6.51       | 6.40       | 6.25       | 6.29       | 6.51       |
| <b>Primary Constituents</b>            |                |            |            |            |            |            |            |
| Nicotine                               | mg/mg nicotine | 1.00E+00   | 1.00E+00   | 1.00E+00   | 1.00E+00   | 1.00E+00   | 1.00E+00   |
| Glycerol                               | mg/mg nicotine | 2.59E+01   | 2.57E+01   | 2.44E+01   | 2.36E+01   | 2.45E+01   | 2.59E+01   |
| Propylene Glycol                       | mg/mg nicotine | 3.36E+01   | 3.33E+01   | 3.09E+01   | 3.08E+01   | 3.27E+01   | 3.36E+01   |
| Water                                  | mg/mg nicotine | 3.17E+00   | 4.08E+00   | 4.14E+00   | 4.40E+00   | 6.47E+00   | 6.47E+00   |
| Menthol                                | mg/mg nicotine | 5.60E-01   | 5.46E-01   | 5.28E-01   | 5.14E-01   | 5.13E-01   | 5.60E-01   |
| Diethylene Glycol                      | mg/mg nicotine | ~ 1.32E-03 | ~ 1.31E-03 | ~ 3.80E-04 | ~ 3.57E-04 | ~ 2.19E-03 | ~ 2.19E-03 |
| Ethylene Glycol                        | mg/mg nicotine | ~ 9.20E-04 | ~ 9.14E-04 | ~ 2.65E-04 | ~ 2.49E-04 | ~ 1.52E-03 | ~ 1.52E-03 |
| <b>Carbonyls &amp; Glycidol</b>        |                |            |            |            |            |            |            |
| Acetaldehyde                           | mg/mg nicotine | 1.16E-04   | 1.12E-04   | 8.92E-05   | 1.20E-04   | ~ 5.08E-05 | 1.20E-04   |
| Acrolein                               | mg/mg nicotine | 1.24E-04   | ~ 4.44E-05 | ~ 3.70E-05 | ~ 4.05E-05 | ~ 4.90E-05 | 1.24E-04   |
| Diacetyl                               | mg/mg nicotine | ~ 3.99E-06 | ~ 4.26E-05 | ~ 3.53E-05 | ~ 3.91E-05 | ~ 4.95E-05 | ~ 4.95E-05 |
| Formaldehyde                           | mg/mg nicotine | 6.56E-04   | 5.85E-04   | 4.44E-04   | 5.30E-04   | 5.42E-04   | 6.56E-04   |
| Glycidol                               | mg/mg nicotine | 2.13E-04   | 1.82E-04   | 1.65E-04   | 1.27E-04   | 2.62E-04   | 2.62E-04   |
| Acetyl Propionyl                       | mg/mg nicotine | ~ 3.94E-06 | ~ 3.91E-06 | ~ 3.24E-06 | ~ 3.55E-06 | ~ 5.94E-06 | ~ 5.94E-06 |
| Butyraldehyde                          | mg/mg nicotine | ~ 3.93E-06 | ~ 3.91E-06 | ~ 3.24E-06 | ~ 3.55E-06 | ~ 4.76E-06 | ~ 4.76E-06 |
| Crotonaldehyde                         | mg/mg nicotine | ~ 6.31E-06 | ~ 6.27E-06 | ~ 5.20E-06 | ~ 5.70E-06 | ~ 5.87E-06 | ~ 6.31E-06 |
| Furfural                               | mg/mg nicotine | ~ 6.46E-06 | ~ 6.42E-06 | ~ 5.32E-06 | ~ 5.83E-06 | ~ 8.15E-06 | ~ 8.15E-06 |
| <b>Nicotine Degradants &amp; TSNAs</b> |                |            |            |            |            |            |            |
| β-Nicotyrine                           | mg/mg nicotine | ~ 3.47E-05 | ~ 3.44E-05 | 7.81E-05   | 6.46E-05   | 7.54E-05   | 7.81E-05   |
| Cotinine                               | mg/mg nicotine | ~ 3.47E-05 | ~ 3.07E-06 | ~ 3.33E-05 | 1.23E-04   | ~ 4.20E-05 | 1.23E-04   |
| Myosmine                               | mg/mg nicotine | ~ 3.46E-05 | 1.00E-04   | 8.38E-05   | 1.08E-04   | 8.78E-05   | 1.08E-04   |
| Nicotine N Oxide                       | mg/mg nicotine | ~ 3.46E-05 | ~ 3.43E-05 | ~ 3.32E-05 | 1.72E-04   | ~ 4.26E-05 | 1.72E-04   |
| Nornicotine                            | mg/mg nicotine | 1.59E-04   | 2.64E-04   | 2.59E-04   | 4.49E-04   | 3.36E-04   | 4.49E-04   |
| Anabasine                              | mg/mg nicotine | ~ 3.17E-06 | ~ 3.54E-06 | ~ 3.04E-06 | ~ 2.86E-06 | ~ 5.11E-06 | ~ 5.11E-06 |

|                              |                |            |            |            |            |            |            |
|------------------------------|----------------|------------|------------|------------|------------|------------|------------|
| <b>Anatabine</b>             | mg/mg nicotine | ~ 3.15E-06 | ~ 3.16E-06 | ~ 3.03E-06 | ~ 2.84E-06 | ~ 4.06E-06 | ~ 4.06E-06 |
| <b>NNK</b>                   | mg/mg nicotine | ~ 9.03E-08 | ~ 8.97E-08 | NT         | NT         | NT         | ~ 9.03E-08 |
| <b>NNN</b>                   | mg/mg nicotine | ~ 2.43E-08 | ~ 2.41E-08 | NT         | NT         | NT         | ~ 2.43E-08 |
| <b>Metals</b>                |                |            |            |            |            |            |            |
| <b>Arsenic</b>               | mg/mg nicotine | ~ 2.99E-07 | ~ 2.97E-07 | ~ 2.87E-07 | ~ 2.69E-07 | ~ 3.30E-07 | ~ 3.30E-07 |
| <b>Beryllium</b>             | mg/mg nicotine | ~ 6.57E-08 | ~ 6.53E-08 | ~ 6.31E-08 | ~ 5.93E-08 | ~ 7.26E-08 | ~ 7.26E-08 |
| <b>Cadmium</b>               | mg/mg nicotine | ~ 2.99E-08 | ~ 2.97E-08 | ~ 2.87E-08 | ~ 2.69E-08 | ~ 3.30E-08 | ~ 3.30E-08 |
| <b>Chromium</b>              | mg/mg nicotine | ~ 2.99E-07 | ~ 2.97E-07 | ~ 2.87E-07 | ~ 2.69E-07 | ~ 3.30E-07 | ~ 3.30E-07 |
| <b>Cobalt</b>                | mg/mg nicotine | ~ 1.49E-08 | ~ 1.48E-08 | ~ 1.43E-08 | ~ 1.35E-08 | ~ 1.65E-08 | ~ 1.65E-08 |
| <b>Copper</b>                | mg/mg nicotine | ~ 7.46E-07 | ~ 7.42E-07 | ~ 7.17E-07 | ~ 6.74E-07 | ~ 8.25E-07 | ~ 8.25E-07 |
| <b>Gold</b>                  | mg/mg nicotine | ~ 5.08E-06 | ~ 5.04E-06 | ~ 4.87E-06 | ~ 4.58E-06 | ~ 5.61E-06 | ~ 5.61E-06 |
| <b>Iron</b>                  | mg/mg nicotine | ~ 2.99E-06 | ~ 2.97E-06 | ~ 2.87E-06 | ~ 2.69E-06 | ~ 3.30E-06 | ~ 3.30E-06 |
| <b>Lead</b>                  | mg/mg nicotine | ~ 7.46E-08 | ~ 7.42E-08 | ~ 7.17E-08 | ~ 6.74E-08 | ~ 8.25E-08 | ~ 8.25E-08 |
| <b>Nickel</b>                | mg/mg nicotine | ~ 1.49E-07 | ~ 1.48E-07 | ~ 1.43E-07 | ~ 1.35E-07 | ~ 1.65E-07 | ~ 1.65E-07 |
| <b>Selenium</b>              | mg/mg nicotine | ~ 7.14E-07 | ~ 7.09E-07 | ~ 6.85E-07 | ~ 6.44E-07 | ~ 7.89E-07 | ~ 7.89E-07 |
| <b>Silver</b>                | mg/mg nicotine | ~ 2.99E-08 | ~ 2.97E-08 | ~ 1.72E-07 | ~ 2.69E-08 | ~ 3.30E-08 | ~ 1.72E-07 |
| <b>Tin</b>                   | mg/mg nicotine | ~ 2.99E-07 | ~ 2.97E-07 | ~ 2.87E-07 | ~ 2.69E-07 | ~ 3.30E-07 | ~ 3.30E-07 |
| <b>Zinc</b>                  | mg/mg nicotine | ~ 4.48E-06 | ~ 4.45E-06 | ~ 4.30E-06 | ~ 4.04E-06 | ~ 4.95E-06 | ~ 4.95E-06 |
| <b>Organic Acids</b>         |                |            |            |            |            |            |            |
| <b>Benzoic Acid</b>          | mg/mg nicotine | 7.84E-01   | 6.83E-01   | 5.76E-01   | 7.68E-01   | 5.78E-01   | 7.84E-01   |
| <b>Propionic Acid</b>        | mg/mg nicotine | ~ 1.85E-03 | ~ 1.84E-03 | ~ 1.77E-03 | ~ 1.49E-03 | ~ 2.33E-03 | ~ 2.33E-03 |
| <b>VOCs</b>                  |                |            |            |            |            |            |            |
| <b>1,3-butadiene</b>         | mg/mg nicotine | ~ 1.64E-06 | ~ 1.63E-06 | NT         | NT         | NT         | ~ 1.64E-06 |
| <b>Acrylonitrile</b>         | mg/mg nicotine | ~ 1.07E-06 | ~ 1.07E-06 | NT         | NT         | NT         | ~ 1.07E-06 |
| <b>Benzene</b>               | mg/mg nicotine | ~ 1.11E-05 | ~ 1.10E-05 | NT         | NT         | NT         | ~ 1.11E-05 |
| <b>Isoprene</b>              | mg/mg nicotine | ~ 2.52E-06 | ~ 2.51E-06 | NT         | NT         | NT         | ~ 2.52E-06 |
| <b>Propylene Oxide</b>       | mg/mg nicotine | ~ 4.35E-06 | ~ 4.32E-06 | NT         | NT         | NT         | ~ 4.35E-06 |
| <b>Toluene</b>               | mg/mg nicotine | ~ 1.34E-05 | ~ 1.32E-05 | NT         | NT         | NT         | ~ 1.34E-05 |
| <b>Esters &amp; Alcohols</b> |                |            |            |            |            |            |            |

# Supplementary Material

|                           |                |            |            |    |    |    |            |
|---------------------------|----------------|------------|------------|----|----|----|------------|
| <b>1-Butanol</b>          | mg/mg nicotine | ~ 5.71E-05 | ~ 5.68E-05 | NT | NT | NT | ~ 5.71E-05 |
| <b>Benzyl Acetate</b>     | mg/mg nicotine | ~ 7.52E-05 | ~ 7.47E-05 | NT | NT | NT | ~ 7.52E-05 |
| <b>Ethyl Acetate</b>      | mg/mg nicotine | 1.07E-02   | 8.57E-03   | NT | NT | NT | 1.07E-02   |
| <b>Ethyl Acetoacetate</b> | mg/mg nicotine | ~ 1.17E-04 | ~ 1.16E-04 | NT | NT | NT | ~ 1.17E-04 |
| <b>Isoamyl Acetate</b>    | mg/mg nicotine | ~ 6.05E-05 | ~ 6.01E-05 | NT | NT | NT | ~ 6.05E-05 |
| <b>Isobutyl Acetate</b>   | mg/mg nicotine | ~ 6.02E-05 | ~ 5.98E-05 | NT | NT | NT | ~ 6.02E-05 |
| <b>Methyl Acetate</b>     | mg/mg nicotine | ~ 6.23E-05 | ~ 7.14E-04 | NT | NT | NT | ~ 7.14E-04 |

~ = approximated numeric value (see Supplemental Materials Appendix 1A) generated from the corresponding LOD and LOQ (See Supplemental Materials Appendix 1B)

## 2 Non-Intense (ISO 3308:2012) Combustible Reference Cigarette Constituent Values

| Parameter/<br>Constituent<br>BLUE= 3R4F<br>BLACK=1R6F | ISO<br>3308:2012<br>Mean | Unit        | Imputed<br>Formatted | Unit<br>Conversion<br>(mg) | Nicotine<br>(mg/cig) | Nicotine<br>Concentration<br>Source     | Nicotine<br>Normalized<br>(mg/mg<br>nicotine) | Analyte<br>Concentration<br>Source      |
|-------------------------------------------------------|--------------------------|-------------|----------------------|----------------------------|----------------------|-----------------------------------------|-----------------------------------------------|-----------------------------------------|
| <b>Primary Constituents</b>                           |                          |             |                      |                            |                      |                                         |                                               |                                         |
| Nicotine                                              | 0.721                    | mg/cig      | 7.21E-01             | 7.21E-01                   | 0.72                 | CoA 1R6F<br>(University of<br>Kentucky) | 1.00E+00                                      | CoA 1R6F<br>(University of<br>Kentucky) |
| Propylene Glycol                                      | 3.20                     | mcg/ci<br>g | 3.20E+00             | 3.20E-03                   | 0.76                 | Uchiyama et al.<br>2018                 | 4.21E-03                                      | Uchiyama et al.<br>2018                 |
| Glycerol                                              | 680.00                   | mcg/ci<br>g | 6.80E-01             | 6.80E-01                   | 0.76                 | Uchiyama et al.<br>2018                 | 8.95E-01                                      | Uchiyama et al.<br>2018                 |
| Water                                                 | 3.20                     | mg/cig      | 3.20E+00             | 3.20E+00                   | 0.76                 | Uchiyama et al.<br>2018                 | 4.21E+00                                      | Uchiyama et al.<br>2018                 |
| Menthol                                               | <0.01                    | mcg/ci<br>g | <0.01                | 1.00E-02                   | 0.76                 | Uchiyama et al.<br>2018                 | ~1.32E-05                                     | Uchiyama et al.<br>2018                 |
| Diethylene Glycol                                     | BLOD                     | mg/cig      | BLOD [~0.00]         | 1.00E-03                   | 0.70                 | GRPT-02816                              | ~1.42E-03                                     | Internal Study                          |
| Ethylene Glycol                                       | 0.007                    | mg/cig      | 7.00E-03             | 7.00E-03                   | 0.70                 | GRPT-02816                              | 9.96E-03                                      | Internal Study                          |
| <b>Carbonyls &amp; Glycidol</b>                       |                          |             |                      |                            |                      |                                         |                                               |                                         |
| Acetaldehyde                                          | 522                      | mcg/ci<br>g | 5.22E+02             | 5.22E-01                   | 0.72                 | CoA 1R6F<br>(University of<br>Kentucky) | 7.24E-01                                      | CoA 1R6F<br>(University of<br>Kentucky) |
| Acrolein                                              | 43                       | mcg/ci<br>g | 4.30E+01             | 4.30E-02                   | 0.72                 | CoA 1R6F<br>(University of<br>Kentucky) | 5.96E-02                                      | CoA 1R6F<br>(University of<br>Kentucky) |
| Diacetyl                                              | 114.78                   | mcg/ci<br>g | 1.15E+02             | 1.15E-01                   | 0.70                 | Jaccard et al. 2019                     | 1.64E-01                                      | Moldoveanu et<br>al. 2017               |
| Formaldehyde                                          | 27                       | mcg/ci<br>g | 2.70E+01             | 2.70E-02                   | 0.72                 | CoA 1R6F<br>(University of<br>Kentucky) | 3.74E-02                                      | CoA 1R6F<br>(University of<br>Kentucky) |
| Glycidol                                              | 0.75                     | mcg/ci<br>g | 7.47E-01             | 7.47E-04                   | 0.72                 | CoA 1R6F<br>(University of<br>Kentucky) | 1.04E-03                                      | Internal Study                          |
| Acetoin                                               | BLOQ                     | mcg/ci<br>g | BLOQ [~1.22]         | 1.22E-03                   | 0.70                 | GRPT-02816                              | ~1.73E-03                                     | GRPT-02816                              |
| Butyraldehyde                                         | 25.90                    | mcg/ci<br>g | 2.59E+01             | 2.59E-02                   | 0.78                 | Jaccard et al. 2019                     | 3.33E-02                                      | Jaccard et al.<br>2019                  |

| Parameter/<br>Constituent<br>BLUE= 3R4F<br>BLACK=1R6F | ISO<br>3308:2012<br>Mean | Unit        | Imputed<br>Formatted | Unit<br>Conversion<br>(mg) | Nicotine<br>(mg/cig) | Nicotine<br>Concentration<br>Source     | Nicotine<br>Normalized<br>(mg/mg<br>nicotine) | Analyte<br>Concentration<br>Source      |
|-------------------------------------------------------|--------------------------|-------------|----------------------|----------------------------|----------------------|-----------------------------------------|-----------------------------------------------|-----------------------------------------|
| Crotonaldehyde                                        | 11                       | mcg/ci<br>g | 1.10E+01             | 1.10E-02                   | 0.72                 | CoA 1R6F<br>(University of<br>Kentucky) | 1.53E-02                                      | CoA 1R6F<br>(University of<br>Kentucky) |
| Furfural                                              | 14.00                    | mcg/ci<br>g | 14                   | 0.014                      | 0.76                 | Uchiyama et al.<br>2018                 | 1.84E-02                                      | Uchiyama et al.<br>2018                 |
| Acetyl Propionyl                                      | 29.52                    | mcg/ci<br>g | 2.95E+01             | 2.95E-02                   | 0.70                 | Jaccard et al. 2019                     | 4.21E-02                                      | Moldoveanu et<br>al. 2017               |
| Nicotine Degradants &<br>TSNAs                        |                          |             |                      |                            |                      |                                         |                                               |                                         |
| Beta Nicotyrine                                       | 7.49                     | mcg/ci<br>g | 7.49E+00             | 7.49E-03                   | 0.70                 | GRPT-02816                              | 1.07E-02                                      | Internal Study                          |
| Cotinine                                              | 4.89                     | mcg/ci<br>g | 4.89E+00             | 4.89E-03                   | 0.70                 | GRPT-02816                              | 6.96E-03                                      | Internal Study                          |
| Myosmine                                              | NA                       | NA          | NA                   | NA                         | NA                   | NA                                      | NA                                            | NA                                      |
| Nicotine N Oxide                                      | BLOQ                     | mcg/ci<br>g | BLOQ [~0.38]         | 3.78E-04                   | 0.70                 | GRPT-02816                              | ~5.37E-04                                     | GRPT-02816                              |
| Nornicotine                                           | 5.70                     | mcg/ci<br>g | 5.70E+00             | 5.70E-03                   | 0.60                 | Jain et al. 2019                        | 9.50E-03                                      | Jain et al. 2019                        |
| Anabasine                                             | 0.50                     | mcg/ci<br>g | 5.00E-01             | 5.00E-04                   | 0.60                 | Jain et al. 2019                        | 8.33E-04                                      | Jain et al. 2019                        |
| Anatabine                                             | 3.60                     | mcg/ci<br>g | 3.60E+00             | 3.60E-03                   | 0.60                 | Jain et al. 2019                        | 6.00E-03                                      | Jain et al. 2019                        |
| NNK                                                   | 71                       | ng/cig      | 7.10E+01             | 7.10E-05                   | 0.72                 | CoA 1R6F<br>(University of<br>Kentucky) | 9.85E-05                                      | CoA 1R6F<br>(University of<br>Kentucky) |
| NNN                                                   | 85                       | ng/cig      | 8.50E+01             | 8.50E-05                   | 0.72                 | CoA 1R6F<br>(University of<br>Kentucky) | 1.18E-04                                      | CoA 1R6F<br>(University of<br>Kentucky) |
| Metals                                                |                          |             |                      |                            |                      |                                         |                                               |                                         |
| Cadmium                                               | 26.10                    | ng/cig      | 2.61E+01             | 2.61E-05                   | 0.78                 | Jaccard et al. 2019                     | 3.35E-05                                      | Jaccard et al.<br>2019                  |
| Chromium                                              | BLOD                     | ng/cig      | BLOD [~0.44]         | 4.40E-07                   | 0.70                 | Jaccard et al. 2019                     | ~6.27E-07                                     | Pappas et al.<br>2014                   |
| Copper                                                | 11.5                     | ng/cig      | 1.15E+01             | 1.15E-05                   | 0.70                 | GRPT-02816                              | 1.64E-05                                      | GRPT-02816                              |



| Parameter/<br>Constituent<br>BLUE= 3R4F<br>BLACK=1R6F | ISO<br>3308:2012<br>Mean | Unit        | Imputed<br>Formatted | Unit<br>Conversion<br>(mg) | Nicotine<br>(mg/cig) | Nicotine<br>Concentration<br>Source     | Nicotine<br>Normalized<br>(mg/mg<br>nicotine) | Analyte<br>Concentration<br>Source      |
|-------------------------------------------------------|--------------------------|-------------|----------------------|----------------------------|----------------------|-----------------------------------------|-----------------------------------------------|-----------------------------------------|
| Lead                                                  | BLOQ                     | ng/cig      | BLOQ [~0.33]         | 3.25E-07                   | 0.78                 | Jaccard et al. 2019                     | ~4.18E-07                                     | Jaccard et al. 2019                     |
| Nickel                                                | BLOD                     | ng/cig      | BLOD [~0.75]         | 7.50E-07                   | 0.78                 | Jaccard et al. 2019                     | ~9.64E-07                                     | Jaccard et al. 2019                     |
| <b>Organic Acids</b>                                  |                          |             |                      |                            |                      |                                         |                                               |                                         |
| Benzoic Acid                                          | NA                       | NA          | NA                   | NA                         | NA                   | NA                                      | NA                                            | NA                                      |
| Acetic Acid                                           | NA                       | NA          | NA                   | NA                         | NA                   | NA                                      | NA                                            | NA                                      |
| Lactic Acid                                           | NA                       | NA          | NA                   | NA                         | NA                   | NA                                      | NA                                            | NA                                      |
| Propionic Acid                                        | NA                       | NA          | NA                   | NA                         | NA                   | NA                                      | NA                                            | NA                                      |
| <b>VOCs</b>                                           |                          |             |                      |                            |                      |                                         |                                               |                                         |
| Acrylonitrile                                         | 7.0                      | mcg/ci<br>g | 7.00E+00             | 7.00E-03                   | 0.72                 | CoA 1R6F<br>(University of<br>Kentucky) | 9.71E-03                                      | CoA 1R6F<br>(University of<br>Kentucky) |
| Benzene                                               | 33                       | mcg/ci<br>g | 3.30E+01             | 3.30E-02                   | 0.72                 | CoA 1R6F<br>(University of<br>Kentucky) | 4.58E-02                                      | CoA 1R6F<br>(University of<br>Kentucky) |
| Propylene oxide                                       | 657.00                   | mcg/ci<br>g | 657                  | 0.657                      | 0.78                 | Jaccard et al. 2019                     | 8.44E-01                                      | Jaccard et al. 2019*                    |
| Toluene                                               | 53                       | mcg/ci<br>g | 53                   | 0.053                      | 0.72                 | CoA 1R6F<br>(University of<br>Kentucky) | 7.35E-02                                      | CoA 1R6F<br>(University of<br>Kentucky) |
| <b>Esters and Alcohols</b>                            |                          |             |                      |                            |                      |                                         |                                               |                                         |
| 1-Butanol                                             | NA                       | NA          | NA                   | NA                         | NA                   | NA                                      | NA                                            | NA                                      |
| Benzyl acetate                                        | NA                       | NA          | NA                   | NA                         | NA                   | NA                                      | NA                                            | NA                                      |
| Ethyl Acetate                                         | NA                       | NA          | NA                   | NA                         | NA                   | NA                                      | NA                                            | NA                                      |
| Ethyl acetoacetate                                    | NA                       | NA          | NA                   | NA                         | NA                   | NA                                      | NA                                            | NA                                      |
| Isoamyl acetate                                       | NA                       | NA          | NA                   | NA                         | NA                   | NA                                      | NA                                            | NA                                      |
| Isobutyl acetate                                      | NA                       | NA          | NA                   | NA                         | NA                   | NA                                      | NA                                            | NA                                      |
| Methyl Acetate                                        | NA                       | NA          | NA                   | NA                         | NA                   | NA                                      | NA                                            | NA                                      |
| <b>Carbon Monoxide</b>                                |                          |             |                      |                            |                      |                                         |                                               |                                         |

| Parameter/<br>Constituent<br>BLUE= 3R4F<br>BLACK=1R6F | ISO<br>3308:2012<br>Mean | Unit   | Imputed<br>Formatted | Unit<br>Conversion<br>(mg) | Nicotine<br>(mg/cig) | Nicotine<br>Concentration<br>Source     | Nicotine<br>Normalized<br>(mg/mg<br>nicotine) | Analyte<br>Concentration<br>Source      |
|-------------------------------------------------------|--------------------------|--------|----------------------|----------------------------|----------------------|-----------------------------------------|-----------------------------------------------|-----------------------------------------|
| Carbon Monoxide                                       | 10.1                     | mg/cig | 1.01E+01             | 1.01E+01                   | 0.72                 | CoA 1R6F<br>(University of<br>Kentucky) | 1.40E+01                                      | CoA 1R6F<br>(University of<br>Kentucky) |

### 3 Intense (ISO 20778:2018) Combustible Reference Cigarette Constituent Values

| Parameter/<br>Constituent<br>BLUE= 3R4F BLACK=1R6F | ISO 20778: 2018<br>Mean | Unit    | Imputed<br>Formatted | Unit<br>Conversion<br>(mg) | Nicotine<br>(mg/cig) | Nicotine<br>Concentration<br>Source     | Nicotine<br>Normalized<br>(mg/mg<br>nicotine) | Analyte<br>Concentration<br>Source                   |
|----------------------------------------------------|-------------------------|---------|----------------------|----------------------------|----------------------|-----------------------------------------|-----------------------------------------------|------------------------------------------------------|
| <b>Primary Constituents</b>                        |                         |         |                      |                            |                      |                                         |                                               |                                                      |
| Nicotine                                           | 1.896                   | mg/cig  | 1.90E+00             | 1.90E+00                   | 1.90                 | CoA 1R6F<br>(University of<br>Kentucky) | 1.00E+00                                      | CoA 1R6F<br>(University of<br>Kentucky)              |
| Glycerol                                           | 2.08                    | mg/cig  | 2.08E+00             | 2.08E+00                   | 1.74                 | St. Helen et al.<br>2018                | 1.20E+00                                      | St. Helen et al.<br>2018                             |
| Propylene Glycol                                   | 23.7                    | mcg/cig | 2.37E+01             | 2.37E-02                   | 1.74                 | St. Helen et al.<br>2018                | 1.36E-02                                      | St. Helen et al.<br>2018                             |
| Water                                              | 15.8                    | mg/cig  | 1.58E+01             | 1.58E+01                   | 1.99                 | Jaccard et al.<br>2019                  | 7.94E+00                                      | Schaller et al.<br>2016                              |
| Menthol                                            | <0.01                   | mcg/cig | <0.01                | 1.00E-02                   | 2.10                 | Uchiyama et<br>al. 2018                 | ~4.76E-03                                     | Uchiyama et<br>al. 2018                              |
| Diethylene Glycol                                  | BLOD                    | mg/cig  | BLOD<br>[~0.00]      | 2.00E-03                   | 2.02                 | Forster et al.<br>2018                  | ~9.90E-04                                     | Forster et al.<br>2018, Internal<br>Study<br>LOD/LOQ |
| Ethylene Glycol                                    | 0.035                   | mg/cig  | 3.50E-02             | 3.50E-02                   | 2.02                 | Forster et al.<br>2018                  | 1.73E-02                                      | Forster et al.<br>2018                               |
| <b>Carbonyls &amp; Glycidol</b>                    |                         |         |                      |                            |                      |                                         |                                               |                                                      |
| Acetaldehyde                                       | 1552                    | mcg/cig | 1.55E+03             | 1.55E+00                   | 1.90                 | CoA 1R6F<br>(University of<br>Kentucky) | 8.19E-01                                      | CoA 1R6F<br>(University of<br>Kentucky)              |
| Acrolein                                           | 154                     | mcg/cig | 1.54E+02             | 1.54E-01                   | 1.90                 | CoA 1R6F<br>(University of<br>Kentucky) | 8.12E-02                                      | CoA 1R6F<br>(University of<br>Kentucky)              |

| Parameter/<br>Constituent<br>BLUE= 3R4F BLACK=1R6F | ISO 20778: 2018<br>Mean | Unit    | Imputed<br>Formatted | Unit<br>Conversion<br>(mg) | Nicotine<br>(mg/cig) | Nicotine<br>Concentration<br>Source     | Nicotine<br>Normalized<br>(mg/mg<br>nicotine) | Analyte<br>Concentration<br>Source                   |
|----------------------------------------------------|-------------------------|---------|----------------------|----------------------------|----------------------|-----------------------------------------|-----------------------------------------------|------------------------------------------------------|
| Diacetyl                                           | 336.93                  | mcg/cig | 3.37E+02             | 3.37E-01                   | 1.99                 | Jaccard et al.<br>2019                  | 1.69E-01                                      | Moldoveanu et<br>al. 2017                            |
| Formaldehyde                                       | 104.00                  | mcg/cig | 1.04E+02             | 1.04E-01                   | 1.90                 | Jaccard et al.<br>2019                  | 5.47E-02                                      | Jaccard et al.<br>2019                               |
| Glycidol                                           | 1.76                    | mcg/cig | 1.76E+00             | 1.76E-03                   | 1.74                 | St. Helen et al.<br>2018                | 1.01E-03                                      | Jaccard et al.<br>2019                               |
| Acetoin                                            | BLOQ                    | mg/cig  | BLOQ<br>[~3.65]      | 3.65E+00                   | 2.02                 | Forster et al.<br>2018                  | ~1.80E+00                                     | Forster et al.<br>2018, Internal<br>Study<br>LOD/LOQ |
| Acetyl Propionyl                                   | 91.87                   | mcg/cig | 9.19E+01             | 9.19E-02                   | 1.99                 | Jaccard et al.<br>2019                  | 4.62E-02                                      | Moldoveanu et<br>al. 2017                            |
| Butyraldehyde                                      | 80.30                   | mcg/cig | 8.03E+01             | 8.03E-02                   | 1.90                 | Jaccard et al.<br>2019                  | 4.23E-02                                      | Jaccard et al.<br>2019                               |
| Crotonaldehyde                                     | 55.00                   | mcg/cig | 5.50E+01             | 5.50E-02                   | 1.90                 | Jaccard et al.<br>2019                  | 2.89E-02                                      | Jaccard et al.<br>2019                               |
| Furfural                                           | 25.9                    | mcg/cig | 2.59E+01             | 2.59E-02                   | 1.74                 | St. Helen et al.<br>2018                | 1.49E-02                                      | St. Helen et al.<br>2018                             |
| Nicotine Degradants &<br>TSNAs                     |                         |         |                      |                            |                      |                                         |                                               |                                                      |
| Beta Nicotyrine                                    | 7071.00                 | ng/cig  | 7.07E+03             | 7.07E-03                   | 2.02                 | Forster et al.<br>2018                  | 3.50E-03                                      | Forster et al.<br>2018                               |
| Cotinine                                           | 14320.00                | ng/cig  | 1.43E+04             | 1.43E-02                   | 2.02                 | Forster et al.<br>2018                  | 7.09E-03                                      | Forster et al.<br>2018                               |
| Myosmine                                           | 13226.00                | ng/cig  | 1.32E+04             | 1.32E-02                   | 2.02                 | Forster et al.<br>2018                  | 6.55E-03                                      | Forster et al.<br>2018                               |
| Nicotine N Oxide                                   | BLOQ                    | mcg/cig | BLOQ<br>[~0.63]      | 6.30E-04                   | 1.93                 | GRPT-02816                              | ~3.26E-04                                     | Internal Study                                       |
| Nornicotine                                        | 22117.00                | ng/cig  | 2.21E+04             | 2.21E-02                   | 2.02                 | Forster et al.<br>2018                  | 1.09E-02                                      | Forster et al.<br>2018                               |
| Anabasine                                          | 1030.00                 | ng/cig  | 1.03E+03             | 1.03E-03                   | 2.02                 | Forster et al.<br>2018                  | 5.10E-04                                      | Forster et al.<br>2018                               |
| Anatabine                                          | 6218.00                 | ng/cig  | 6.22E+03             | 6.22E-03                   | 2.02                 | Forster et al.<br>2018                  | 3.08E-03                                      | Forster et al.<br>2018                               |
| NNK                                                | 187                     | ng/cig  | 1.87E+02             | 1.87E-04                   | 1.90                 | CoA 1R6F<br>(University of<br>Kentucky) | 9.86E-05                                      | CoA 1R6F<br>(University of<br>Kentucky)              |

| Parameter/<br>Constituent<br>BLUE= 3R4F BLACK=1R6F | ISO 20778: 2018<br>Mean | Unit    | Imputed<br>Formatted | Unit<br>Conversion<br>(mg) | Nicotine<br>(mg/cig) | Nicotine<br>Concentration<br>Source     | Nicotine<br>Normalized<br>(mg/mg<br>nicotine) | Analyte<br>Concentration<br>Source                   |
|----------------------------------------------------|-------------------------|---------|----------------------|----------------------------|----------------------|-----------------------------------------|-----------------------------------------------|------------------------------------------------------|
| NNN                                                | 212                     | ng/cig  | 2.12E+02             | 2.12E-04                   | 1.90                 | CoA 1R6F<br>(University of<br>Kentucky) | 1.12E-04                                      | CoA 1R6F<br>(University of<br>Kentucky)              |
| <b>Metals</b>                                      |                         |         |                      |                            |                      |                                         |                                               |                                                      |
| Cadmium                                            | 76.10                   | ng/cig  | 7.61E+01             | 7.61E-05                   | 1.90                 | Jaccard et al.<br>2019                  | 4.01E-05                                      | Jaccard et al.<br>2019                               |
| Chromium                                           | BLOD                    | ng/cig  | BLOD<br>[~0.75]      | 7.50E-07                   | 1.90                 | Jaccard et al.<br>2019                  | ~3.95E-07                                     | Forster et al.<br>2018, Internal<br>Study<br>LOD/LOQ |
| Copper                                             | 24.80                   | ng/cig  | 2.48E+01             | 2.48E-05                   | 2.02                 | Forster et al.<br>2018                  | 1.23E-05                                      | Forster et al.<br>2018                               |
| Lead                                               | 31.2                    | ng/cig  | 3.12E+01             | 3.12E-05                   | 1.74                 | St. Helen et al.<br>2018                | 1.79E-05                                      | St. Helen et al.<br>2018                             |
| Nickel                                             | BLOD                    | ng/cig  | BLOD<br>[~1.50]      | 1.50E-06                   | 1.90                 | Jaccard et al.<br>2019                  | ~7.89E-07                                     | Forster et al.<br>2018, Internal<br>Study<br>LOD/LOQ |
| <b>Organic Acids</b>                               |                         |         |                      |                            |                      |                                         |                                               |                                                      |
| Benzoic Acid                                       | NA                      | NA      | NA                   | NA                         | NA                   | NA                                      | NA                                            | NA                                                   |
| Acetic Acid                                        | NA                      | NA      | NA                   | NA                         | NA                   | NA                                      | NA                                            | NA                                                   |
| Lactic Acid                                        | NA                      | NA      | NA                   | NA                         | NA                   | NA                                      | NA                                            | NA                                                   |
| Propionic Acid                                     | NA                      | NA      | NA                   | NA                         | NA                   | NA                                      | NA                                            | NA                                                   |
| <b>VOCs</b>                                        |                         |         |                      |                            |                      |                                         |                                               |                                                      |
| Acrylonitrile                                      | 24.00                   | mcg/cig | 2.40E+01             | 2.40E-02                   | 1.90                 | CoA 1R6F<br>(University of<br>Kentucky) | 1.27E-02                                      | CoA 1R6F<br>(University of<br>Kentucky)              |
| Benzene                                            | 88                      | mcg/cig | 8.80E+01             | 8.80E-02                   | 1.9                  | CoA 1R6F<br>(University of<br>Kentucky) | 4.67E-02                                      | CoA 1R6F<br>(University of<br>Kentucky)              |
| Propylene oxide                                    | 1710                    | ng/cig  | 1.71E+03             | 1.71E-03                   | 1.9                  | Jaccard et al.<br>2019                  | 9.00E-04                                      | Jaccard et al.<br>2019                               |

| Parameter/<br>Constituent<br>BLUE= 3R4F BLACK=1R6F | ISO 20778: 2018<br>Mean | Unit    | Imputed<br>Formatted | Unit<br>Conversion<br>(mg) | Nicotine<br>(mg/cig) | Nicotine<br>Concentration<br>Source     | Nicotine<br>Normalized<br>(mg/mg<br>nicotine) | Analyte<br>Concentration<br>Source      |
|----------------------------------------------------|-------------------------|---------|----------------------|----------------------------|----------------------|-----------------------------------------|-----------------------------------------------|-----------------------------------------|
| Toluene                                            | 150                     | mcg/cig | 1.50E+02             | 1.50E-01                   | 1.9                  | CoA 1R6F<br>(University of<br>Kentucky) | 7.91E-02                                      | CoA 1R6F<br>(University of<br>Kentucky) |
| Esters and Alcohols                                |                         |         |                      |                            |                      |                                         |                                               |                                         |
| 1-Butanol                                          | NA                      | NA      | NA                   | NA                         | NA                   | NA                                      | NA                                            | NA                                      |
| Benzyl acetate                                     | NA                      | NA      | NA                   | NA                         | NA                   | NA                                      | NA                                            | NA                                      |
| Ethyl Acetate                                      | NA                      | NA      | NA                   | NA                         | NA                   | NA                                      | NA                                            | NA                                      |
| Ethyl acetoacetate                                 | NA                      | NA      | NA                   | NA                         | NA                   | NA                                      | NA                                            | NA                                      |
| Isoamyl acetate                                    | NA                      | NA      | NA                   | NA                         | NA                   | NA                                      | NA                                            | NA                                      |
| Isobutyl acetate                                   | NA                      | NA      | NA                   | NA                         | NA                   | NA                                      | NA                                            | NA                                      |
| Methyl Acetate                                     | NA                      | NA      | NA                   | NA                         | NA                   | NA                                      | NA                                            | NA                                      |
| Carbon Monoxide                                    |                         |         |                      |                            |                      |                                         |                                               |                                         |
| Carbon Monoxide                                    | 28.0                    | mg/cig  | 2.80E+01             | 2.80E+01                   | 1.90                 | CoA 1R6F<br>(University of<br>Kentucky) | 1.48E+01                                      | CoA 1R6F<br>(University of<br>Kentucky) |
