# Supplementary material for: A Practical Framework for Novel Electronic Nicotine Delivery System Evaluation: Chemical and Toxicological Characterization of JUUL2 Aerosol and Comparison with Reference Cigarettes
Source: MDPI journal article supplement (doi:10.3390/toxics12010041), 2024-01-04
Supplement: s1 [file s1]

## ***Supplementary Material File S6***

### **1 In Vitro Methodologies for Toxicological Characterization of Aerosol**

NRU cytotoxicity and Ames mutagenicity assays were performed as previously described (Lalonde et al. 2022).

#### **1.1 Cell Culture**

Human adenocarcinoma A549 cells and Mouse embryonic fibroblast BALBc/3T3 cells used in this assay were obtained from ATCC (Manassas, VA). Cells were propagated at Enthelphy Analytical, and subcultures stored in liquid nitrogen. The cells were tested for the absence of mycoplasma contamination and were not used beyond the 16th passage after removal from liquid nitrogen. A549 cells were cultured in complete F-12K medium supplemented with 10% Fetal bovine serum (FBS), penicillin G (100 units/mL) and streptomycin (100 µg/mL), as recommended by the manufacturer. BALBc/3T3 cells were grown in DMEM (Dulbecco's Modified Eagles medium) supplemented with non-heat-inactivated 10% bovine calf serum (BCS), penicillin G (100 units/mL) and streptomycin (100 µg/mL). Cultures were grown in a humidified incubator at  $37 \pm 1$  °C in an atmosphere of  $5 \pm 1\%$  CO<sub>2</sub> in air.

The *Salmonella typhimurium* tester strains TA1537, TA98, TA100, TA1535 were originally purchased from Molecular Toxicology, Inc. (Boone, NC). The *S. typhimurium* strain TA102 was originally obtained from Pfizer Global Research and Development (Groton, CT). Isolates of the tester strains were stored at -60°C to -80°C until use. For each experiment, an inoculum from an isolate culture was grown in Oxoid nutrient broth with shaking (5-12 hours) at approximately 37°C  $\pm$  1°C. Bacterial cell titers were determined for these assays, as per the applicable SOP. TK6 cells, a human lymphoblast cell line were originally obtained from Pfizer Global Research and Development (Groton, CT) and subsequently subcloned at Charles River. Cell passage number was limited to 24 passages. Stock cultures were maintained in RPMI 1640 + L-glutamine supplemented with 10% heat inactivated fetal bovine serum (FBS) and 1% penicillin-streptomycin (Complete Culture Medium, CCM). Cultures were incubated at 36°C to 38°C and 4% to 6% CO<sub>2</sub>.

#### **1.2 S9 Metabolic Activation System**

The 9000 × g liver supernatant fraction (S9) from phenobarbital/5,6-benzoflavone-treated male rats, glucose-6-phosphate and MgCl<sub>2</sub>-KCl in 0.1M phosphate buffer (Regensys "A"), and lyophilized nicotinamide adenine dinucleotide phosphate (NADP; Regensys "B") were obtained from Molecular Toxicology, Inc. (Boone, NC). These reagents were combined to create the metabolic activation mixture (S9), maintained at 2°C to 8°C or on ice prior to use, on the day of testing.

Regensys "A" and Regensys "B" were received in pre-measured aliquots and stored refrigerated (2°C to 8°C) and frozen (below -20°C), respectively. Prior to use, the appropriate aliquot(s) of Regensys "B" was removed from storage and maintained at ambient temperature. Regensys "A" was maintained at 2°C to 8°C or on ice. Regensys "A" was used to reconstitute an appropriate aliquot of Regensys "B". The Regensys A and B solution was mixed prior to formulating the S9 mixture (7.5% v/v S9).

### 1.3 Neutral Red Uptake (NRU) Cytotoxicity (OECD guidance 129)

The test articles for the NRU assay were aerosol condensates from the relevant sample. Cell cultures were initiated by seeding approximately 10,000 (A549) or 3,000 (BALBc/3T3) exponentially growing cells in 0.2 mL (A549) or 0.1 mL (BALBc/3T3) cell culture medium per microwell of 96 microwell plates. Cultures were incubated overnight ( $24 \pm 2$  hrs.) in a humidified incubator at  $37 \pm 1^\circ\text{C}$  in an atmosphere of  $5 \pm 1\%$   $\text{CO}_2$  in air prior to use in the NRU assay. One day after culture initiation ( $24 \pm 2$  hrs.), the medium was aspirated and replaced with fresh dosing medium containing vehicle control (USP ethanol), positive control (SLS), or the test article and then returned to the incubator at  $37 \pm 1^\circ\text{C}$  and  $5 \pm 1\%$   $\text{CO}_2$  for an exposure period of ~48 hours.

The eight non-zero concentrations of aerosol condensate in ethanol were 20, 30, 45, 65, 95, 140, 205, and 300  $\mu\text{g/mL}$  (approximately 0.033, 0.050, 0.075, 0.109, 0.159, 0.234, 0.344, 0.500%)(v/v). The final concentration of EtOH in the dosing media was normalized and did not exceed 0.5% per OECD standards (see Table 1). The eight non-zero concentrations of SLS were 6.8, 10.0, 14.7, 21.5, 31.6, 46.4, 68.1, and 100  $\mu\text{g/mL}$ . All tests were performed in six replicates. Osmolarity and pH measurements will be performed on the two highest doses of the e-vapor ethanol condensate tested. Osmolarity and pH was also measured for the tissue culture medium, tissue culture medium+vehicle control, and tissue culture medium+test sample.

**Table S1 Neutral Red Uptake Dosing**

| Dose number | Dose ( $\mu\text{g/mL}$ ) | Sample ( $\mu\text{L}$ ) | Ethanol ( $\mu\text{L}$ ) | Media ( $\mu\text{L}$ ) | % test article v/v |
|-------------|---------------------------|--------------------------|---------------------------|-------------------------|--------------------|
| 1           | 300                       | 5                        | 0                         | 995                     | 0.503              |
| 2           | 205                       | 3.42                     | 1.58                      | 995                     | 0.344              |
| 3           | 140                       | 2.33                     | 2.67                      | 995                     | 0.234              |
| 4           | 95                        | 1.58                     | 3.42                      | 995                     | 0.159              |
| 5           | 65                        | 1.08                     | 3.92                      | 995                     | 0.109              |
| 6           | 45                        | 0.75                     | 4.25                      | 995                     | 0.075              |
| 7           | 30                        | 0.5                      | 4.5                       | 995                     | 0.050              |
| 8           | 20                        | 0.33                     | 4.67                      | 995                     | 0.033              |
| VC          | VC                        | 0                        | 5                         | 995                     | 0.000              |

Plates were visually inspected for precipitation and/or changes in morphology of the cells due to cytotoxic effects after 48 hours. Medium was removed from the wells by aspiration and the cells were rinsed with 250  $\mu\text{L}$ /well pre-warmed PBS. The rinsing solution was removed by plate inversion. Then 250  $\mu\text{L}$  of a “crystal free” neutral red dye solution (25  $\mu\text{g/mL}$  NR Dye solution in complete growth medium; crystals removed by centrifugation at 1500 rpm for  $\geq 8$  min) was added to each well. Plates were subsequently incubated for  $3 \pm 0.25$  hrs. After incubation, NR medium was removed, cells were rinsed with 250  $\mu\text{L}$ /well pre-warmed PBS, and 100  $\mu\text{L}$  NR desorb solution (freshly prepared 50% ethanol and 1% acetic acid in water) was added to all wells (including blanks) to extract the dye. The plates were then shaken rapidly on a microtiter plate shaker for 20-45 min while protected from light.

Optical density [OD] was measured at  $540 \pm 10$  nm (OD540) using a spectrophotometer (SYNERGY MX™ MULTI-MODE MICROPLATE READER (MSPEC-01) with the SkanIt DDE for MSS 2.4.4 Software) within 60 minutes of adding NR desorb solution. Blanks of each

plate were subtracted and the relative cell survival (% of vehicle control) of each culture exposed to the individual doses of the test articles was calculated (Equation 1). Hill function analysis of cell viability for each concentration to calculate the half maximal inhibitor concentration (IC<sub>50</sub>) for the positive control and test articles was performed. The average, standard deviation and relative standard deviation was calculated for the uncorrected (raw) absorbance, the blank corrected absorbance, and the normalized (relative to the vehicle control) absorbance of each replicate value for each dose of the positive controls and the test articles.

**Equation 1:** % Relative viability = (NRU-Blank corrected absorbance of test article / NRU blank corrected absorbance for Vehicle control) \*100

#### 1.4 Ames Reverse Mutation Assay (OECD guidance 471)

The test articles for the Ames assay were aerosol condensates from the relevant sample. A preincubation procedure was performed using the appropriate positive controls (see Table 2), vehicle control (200 proof ethanol), and at least 5 test article concentrations in triplicate with and without metabolic activation ( $\pm$ S9). Controls were shared between the test articles if they were dosed concurrently. Test article was diluted in 200 proof ethanol to form the following test concentrations: 0.781, 1.56, 3.13, 6.25, 12.5, 25.0, 50.0, and 100  $\mu$ L/plate.

**Table S2 Ames Treatment Groups**

| Treatment Groups                                | Concentration/<br>Plate            | Metabolic<br>Activation | Strains <sup>a</sup> |
|-------------------------------------------------|------------------------------------|-------------------------|----------------------|
| 1. Vehicle Control                              | $\leq 200 \mu\text{L}$             | -/+                     | All                  |
| 2. Concentrations of test article               | Specified in protocol <sup>b</sup> | -/+                     | All                  |
| 3. Positive Control ICR 191<br>acridine         | 0.5 $\mu\text{g}$                  | –                       | TA1537               |
| 4. Positive Control 2 Nitrofluorene             | 2.5 $\mu\text{g}$                  | –                       | TA98                 |
| 5. Positive Control Sodium azide                | 1.0 $\mu\text{g}$                  | –                       | TA100, TA1535        |
| 6. Positive Control<br>4-Nitroquinoline-N-oxide | 2.0 $\mu\text{g}$                  | –                       | TA102                |
| 7. Positive Control 2-<br>Aminoanthracene       | 10.0 $\mu\text{g}$                 | +                       | TA102                |
| 8. Positive Control 2-<br>Aminoanthracene       | 2.5 $\mu\text{g}$                  | +                       | All except TA102     |

Pre-incubation was performed by adding 0.10 mL of the vehicle control or test article, or 0.05 mL of the positive control; 0.5 mL of S9 mixture for plates with metabolic activation or 0.5 mL of PBS for plates without metabolic activation; and 0.1 mL of tester strain to sterile tubes and incubated with shaking (100-150 rpm) at 36°C to 38°C for 20 minutes. After pre-incubation, tubes were removed from the shaker and 2 mL of molten top agar, supplemented with 10% of a 0.5 mM histidine/biotin/tryptophan solution, was added and vortexed gently. The complete mixture was then poured onto minimal glucose agar plates and allowed to set. Plates were incubated at 36°C to 38°C for approximately 2 days.

After 2 days incubation period, plates were evaluated macroscopically for precipitation of test article and microscopically for thinning of the background lawn. The number of revertant colonies were counted by hand or with an automatic colony counter and recorded. Plates that had a cytotoxic reduction in background lawn growth (> 50% reduction in the background lawn)

were not counted. A minimum of five non-cytotoxic concentrations were required to evaluate an assay. Concentrations of > 50% reduction in mean number of revertants/plate accompanied by a concentration-dependent drop in mean revertants, or a > 50% reduction in background lawn were considered cytotoxic. Positive results for mutagenicity were considered an increase of revertants/plate at least 2 times the vehicle control background frequency for strains with high spontaneous levels (i.e., TA100 and TA102) and 3 times for those with low spontaneous levels (TA1537, TA98, and TA1535) with increasing concentration.

### **1.5 Micronucleus (MN) Assay (OECD guidance 487)**

The in vitro micronucleus assay was performed in human lymphoblast TK6 cells, according to OECD Test Guidance 487. In brief, on the day prior to treatment, cells were sub-cultured and exponentially growing cultures of TK6 cells were treated with the vehicle control, positive controls or test article (aerosol condensate) in the presence and absence of metabolic activation for short incubations (4 hours) and in the absence of activation for the long incubation (27 hours). The metabolic activation mixture, consisting of 0.3 mL of S9 fraction, 1.5 mL of dilution medium, and 36.5 mg nicotinamide adenine dinucleotide phosphate reduced form was prepared daily. Positive controls for each of the incubation conditions were, mitomycin C, vinblastine sulfate and cyclophosphamide for the 4 hour without S9, 27 Hour without S9 and 4 hour with S9, respectively.

During the short exposures, cells were treated with the test articles for 4 hours either with or without metabolic activation. This was followed by a 40-hour recovery period, for a total incubation time of 44 hours. During the long exposures, cells were treated with the test articles without S9 for 27 hours, and with no recovery period. Osmolality and pH of the test mixtures were measured to assure that they had an osmolality of <120% of the vehicle control and a pH in an acceptable range.

Two cultures were set up for each treatment condition and condensate concentration. Each culture was sampled to assess cytotoxicity using a Coulter counter and for the percentage of micronuclei by flow cytometric analysis using the FACSDiva software package and the MicroFlow kit (Litron, Rochester, NY). Ten thousand cells were analyzed in each culture for a total of at least 20,000 cells/ concentration.

### **1.6 Condensate Stability**

Concentrations of primary constituents and water in the JUUL2 ENDS aerosol condensates measured at 0, 4 and 8 weeks after production, indicate condensate stability (stored at -65°C) over the period of biological testing. Concentrations at 4 and 8 weeks after condensate production expressed as a percentage of concentration measured at Week 0 is shown in Table 3. All primary constituents are present at concentrations > 85% of their concentration at Week 0.

**Table S3:** Concentrations of Water and Primary Constituents in Condensates Measured 4 and 8 Weeks After Production Expressed as Percentage of Analyte Concentration at week 0.

| Assay      | Condensate       | Puffing Regime | Timepoint (Weeks) | % of analyte concentration at T=0 |         |          |          |       |              |
|------------|------------------|----------------|-------------------|-----------------------------------|---------|----------|----------|-------|--------------|
|            |                  |                |                   | PG                                | Menthol | Nicotine | Glycerol | Water | Benzoic Acid |
| NRU - 3T3  | Virginia Tobacco | Non Intense    | 4                 | 96.8                              | NA      | 95.8     | 96.9     | 109.4 | 0.1          |
| NRU - A549 | Virginia Tobacco | Non Intense    | 4                 | 109.9                             | NA      | 108.2    | 108.4    | 118.3 | 96.4         |
| Ames, MN   | Virginia Tobacco | Non Intense    | 4                 | 97.5                              | NA      | 96.8     | 99.2     | 102.9 | 97.3         |
|            | Virginia Tobacco | Non Intense    | 8                 | 101                               | NA      | 100.9    | 99.7     | 121.1 | 104.7        |
| NRU - 3T3  | Virginia Tobacco | Intense        | 4                 | 95.2                              | NA      | 95.9     | 94.6     | 105.1 | 95.1         |
| NRU - A549 | Virginia Tobacco | Intense        | 4                 | 125.6                             | NA      | 126.4    | 123.0    | 142.7 | 92.6         |
| Ames, MN   | Virginia Tobacco | Intense        | 4                 | 98.2                              | NA      | 97.4     | 97.0     | 100.9 | 98.0         |
|            | Virginia Tobacco | Intense        | 8                 | 102.7                             | NA      | 102.2    | 99.5     | 117.1 | 104.7        |
| NRU - 3T3  | Crisp Menthol    | Non Intense    | 7                 | 107.6                             | 107.8   | 106.5    | 100.9    | 104.0 | 110.1        |
| NRU - A549 | Crisp Menthol    | Non Intense    | 7                 | 96.0                              | 98.4    | 95.0     | 89.3     | 81.3  | 109.4        |
| Ames, MN   | Crisp Menthol    | Non Intense    | 4                 | 99.1                              | 98.8    | 98.8     | 102.1    | 130.1 | 108.6        |
|            | Crisp Menthol    | Non Intense    | 8                 | 98.4                              | 97.9    | 96.9     | 99.2     | 110.2 | 93.3         |
| NRU - 3T3  | Crisp Menthol    | Intense        | 7                 | 107.6                             | 109.0   | 106.4    | 99.2     | 99.0  | 109.1        |
| NRU - A549 | Crisp Menthol    | Intense        | 7                 | 103.9                             | 105.5   | 102.6    | 97.3     | 95.4  | 107.0        |
| Ames, MN   | Crisp Menthol    | Intense        | 4                 | 101.2                             | 101.0   | 101.2    | 105.3    | 130.6 | 106.5        |
|            | Crisp Menthol    | Intense        | 8                 | 96.5                              | 95.9    | 95.3     | 98.0     | 116.6 | 92.2         |
| NRU - 3T3  | Polar Menthol    | Non Intense    | 4                 | 103.9                             | 103.1   | 105.1    | 105.4    | 95.6  | 112.3        |
| NRU - A549 | Polar Menthol    | Non Intense    | 4                 | 88.6                              | 87.0    | 89.4     | 88.0     | 83.0  | 110.9        |
| Ames, MN   | Polar Menthol    | Non Intense    | 4                 | 96.0                              | 97.3    | 94.4     | 98.3     | 101.3 | 98.9         |
|            | Polar Menthol    | Non Intense    | 8                 | 98.2                              | 100.3   | 96.5     | 95.3     | 115.6 | 98.0         |
|            | Polar Menthol    | Intense        | 26                | 99.1                              | 100.3   | 92.8     | 97.9     | 111.0 | 111.0        |
| NRU - 3T3  | Polar Menthol    | Intense        | 4                 | 98.5                              | 96.5    | 100.3    | 102.2    | 85.1  | 108.3        |
| NRU - A549 | Polar Menthol    | Intense        | 4                 | 98.6                              | 97.2    | 100.8    | 102.9    | 95.8  | 112.0        |

|                                |                |             |    |       |       |       |       |       |       |
|--------------------------------|----------------|-------------|----|-------|-------|-------|-------|-------|-------|
| Ames, MN                       | Polar Menthol  | Intense     | 4  | 86.3  | 86.9  | 85.3  | 87.6  | 84.6  | 100.4 |
|                                | Polar Menthol  | Intense     | 8  | 90.2  | 92.7  | 89.0  | 88.0  | 102.8 | 98.4  |
|                                | Polar Menthol  | Intense     | 26 | 89.2  | 90.0  | 84.0  | 88.4  | 95.0  | 111.5 |
| NRU<br>(3T3/A549),<br>Ames, MN | Autumn Tobacco | Non Intense | 4  | 98.0  | NA    | 96.6  | 97.9  | 93.5  | 86.1  |
|                                | Autumn Tobacco | Non Intense | 8  | 102.0 | NA    | 102.5 | 102.1 | 105.6 | 91.4  |
|                                | Autumn Tobacco | Intense     | 4  | 99.7  | NA    | 97.7  | 104.0 | 97.5  | 87.1  |
|                                | Autumn Tobacco | Intense     | 8  | 100.0 | NA    | 100.6 | 105.3 | 122.1 | 93.6  |
| NRU<br>(3T3/A549),<br>Ames, MN | Ruby Menthol   | Non Intense | 4  | 96.8  | 97.0  | 96.7  | 97.8  | 98.9  | 85.6  |
|                                | Ruby Menthol   | Non Intense | 9  | 104.9 | 103.8 | 105.1 | 102.7 | 101.2 | 95.6  |
|                                | Ruby Menthol   | Intense     | 4  | 98.5  | 97.8  | 96.4  | 103.1 | 97.3  | 86.3  |
|                                | Ruby Menthol   | Intense     | 9  | 103.7 | 101.3 | 102.2 | 107.0 | 98.2  | 94.5  |
| NRU<br>(3T3/A549),<br>Ames, MN | Summer Menthol | Non Intense | 4  | 96.3  | 96.7  | 94.6  | 99.1  | 89.2  | 93.6  |
|                                | Summer Menthol | Non Intense | 9  | 99.3  | 100.4 | 98.9  | 105.0 | 90.4  | 107.2 |
|                                | Summer Menthol | Intense     | 4  | 97.8  | 98.0  | 95.7  | 99.6  | 93.3  | 96.5  |
|                                | Summer Menthol | Intense     | 9  | 99.1  | 100.5 | 98.1  | 103.8 | 93.6  | 107.7 |

## 2 Supplemental Biological Results

**Figure S1. BALB/c 3T3 and A549 Cytotoxicity of Intense and Non-intense ENDS Aerosol (reported as ACM) and 3R4F Smoke Condensates (reported as TPM), Measured in the NRU Assay. The Dotted Line Represented the 70% Relative Viability Cut-Off Defining Cytotoxicity.**

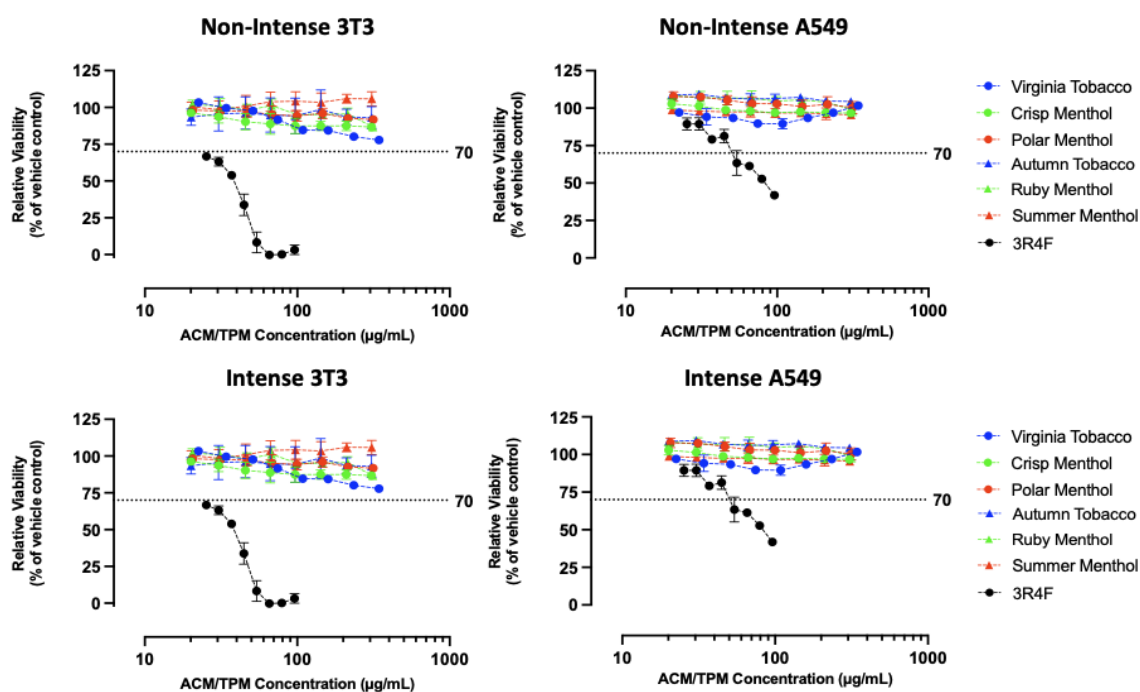

**Figure S2. Ames assay results in *S. typhimurium* strains with and without metabolic activation conditions in which no increase in revertant counts were observed.**

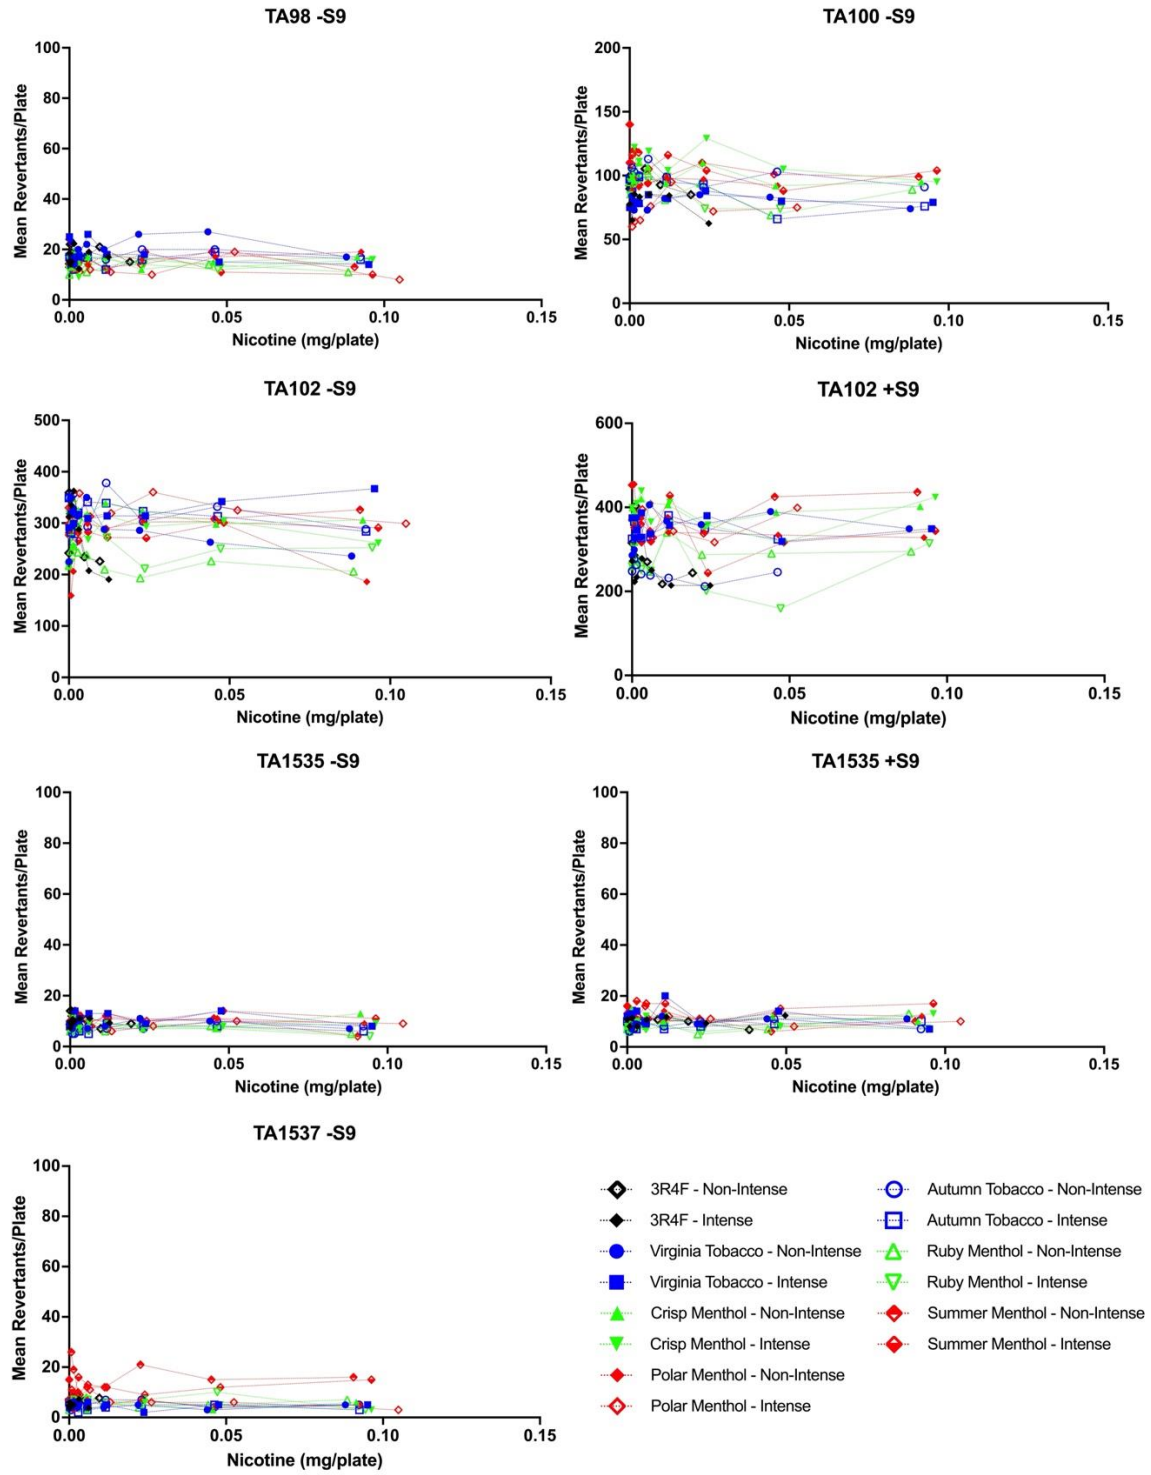

3R4F = Reference Cigarette 3R4F





|                                         | Treatment Group          | µg/plate | TA98 |     | TA100 |    | TA1535 |     | TA1537 |     | TA102 |     |
|-----------------------------------------|--------------------------|----------|------|-----|-------|----|--------|-----|--------|-----|-------|-----|
|                                         |                          |          | Mean | SD  | Mean  | SD | Mean   | SD  | Mean   | SD  | Mean  | SD  |
| Crisp Menthol (18 mg/mL)<br>Non Intense | WITHOUT ACTIVATION       |          |      |     |       |    |        |     |        |     |       |     |
|                                         | 200 Proof Ethanol        | 100 µL   | 16   | 2   | 85    | 11 | 7      | 4   | 4      | 5   | 318   | 25  |
|                                         | 2-Nitrofluorene          | 2.5      | 876  | 72  |       |    |        |     |        |     |       |     |
|                                         | Sodium Azide             | 1.0      |      |     | 455   | 60 | 466    | 136 |        |     |       |     |
|                                         | ICR-191 Acridine         | 0.5      |      |     |       |    |        |     | 670    | 463 |       |     |
|                                         | 4-Nitroquinoline-N-oxide | 2.0      |      |     |       |    |        |     |        |     | 955   | 150 |
|                                         | WITH ACTIVATION          |          |      |     |       |    |        |     |        |     |       |     |
|                                         | 200 Proof Ethanol        | 100 µL   | 24   | 5   | 116   | 30 | 8      | 6   | 8      | 2   | 399   | 104 |
|                                         | 2-Aminoanthracene        | 2.5      | 2207 | 224 | 2890  | 27 | 235    | 35  | 425    | 21  |       |     |
|                                         | 2-Aminoanthracene        | 10.0     |      |     |       |    |        |     |        |     | 3136  | 292 |
| Crisp Menthol (18 mg/mL)<br>Intense     | WITHOUT ACTIVATION       |          |      |     |       |    |        |     |        |     |       |     |
|                                         | 200 Proof Ethanol        | 100 µL   | 16   | 2   | 85    | 11 | 7      | 4   | 4      | 5   | 318   | 25  |
|                                         | 2-Nitrofluorene          | 2.5      | 876  | 72  |       |    |        |     |        |     |       |     |
|                                         | Sodium Azide             | 1.0      |      |     | 455   | 60 | 466    | 136 |        |     |       |     |
|                                         | ICR-191 Acridine         | 0.5      |      |     |       |    |        |     | 670    | 463 |       |     |
|                                         | 4-Nitroquinoline-N-oxide | 2.0      |      |     |       |    |        |     |        |     | 955   | 150 |
|                                         | WITH ACTIVATION          |          |      |     |       |    |        |     |        |     |       |     |
|                                         | 200 Proof Ethanol        | 100 µL   | 24   | 5   | 116   | 30 | 8      | 6   | 8      | 2   | 399   | 104 |
|                                         | 2-Aminoanthracene        | 2.5      | 2207 | 224 | 2890  | 27 | 235    | 35  | 425    | 21  |       |     |
|                                         | 2-Aminoanthracene        | 10.0     |      |     |       |    |        |     |        |     | 3136  | 292 |

|                                         | Treatment Group          | µg/plate | TA98            |     | TA100 |     | TA1535          |    | TA1537 |    | TA102 |     |
|-----------------------------------------|--------------------------|----------|-----------------|-----|-------|-----|-----------------|----|--------|----|-------|-----|
|                                         |                          |          | Mean            | SD  | Mean  | SD  | Mean            | SD | Mean   | SD | Mean  | SD  |
| Polar Menthol (18 mg/mL)<br>Non Intense | WITHOUT ACTIVATION       |          |                 |     |       |     |                 |    |        |    |       |     |
|                                         | 200 Proof Ethanol        | 100 µL   | 24              | 5   | 140   | 24  | 8               | 2  | 4      | 1  | 311   | 40  |
|                                         | 2-Nitrofluorene          | 2.5      | 844             | 84  |       |     |                 |    |        |    |       |     |
|                                         | Sodium Azide             | 1.0      |                 |     | 485   | 27  | 481             | 13 |        |    |       |     |
|                                         | ICR-191 Acridine         | 0.5      |                 |     |       |     |                 |    | 297    | 90 |       |     |
|                                         | 4-Nitroquinoline-N-oxide | 2.0      |                 |     |       |     |                 |    |        |    | 900   | 16  |
|                                         | WITH ACTIVATION          |          |                 |     |       |     |                 |    |        |    |       |     |
|                                         | 200 Proof Ethanol        | 100 µL   | 20 <sup>a</sup> | 1   | 152   | 12  | 16              | 5  | 7      | 2  | 453   | 22  |
|                                         | 2-Aminoanthracene        | 2.5      | 1980            | 210 | 1319  | 250 | 89              | 23 | 139    | 26 |       |     |
|                                         | 2-Aminoanthracene        | 10.0     |                 |     |       |     |                 |    |        |    | 1053  | 187 |
| Polar Menthol (18 mg/mL)<br>Intense     | WITHOUT ACTIVATION       |          |                 |     |       |     |                 |    |        |    |       |     |
|                                         | 200 Proof Ethanol        | 100 µL   | 24              | 5   | 140   | 24  | 10 <sup>a</sup> | 2  | 7      | 2  | 330   | 49  |
|                                         | 2-Nitrofluorene          | 2.5      | 844             | 84  |       |     |                 |    |        |    |       |     |
|                                         | Sodium Azide             | 1.0      |                 |     | 485   | 27  | 456             | 30 |        |    |       |     |
|                                         | ICR-191 Acridine         | 0.5      |                 |     |       |     |                 |    | 559    | 33 |       |     |
|                                         | 4-Nitroquinoline-N-oxide | 2.0      |                 |     |       |     |                 |    |        |    | 1147  | 103 |
|                                         | WITH ACTIVATION          |          |                 |     |       |     |                 |    |        |    |       |     |
|                                         | 200 Proof Ethanol        | 100 µL   | 20 <sup>a</sup> | 1   | 152   | 12  | 16              | 5  | 7      | 2  | 453   | 22  |
|                                         | 2-Aminoanthracene        | 2.5      | 1980            | 210 | 1319  | 250 | 89              | 23 | 139    | 26 |       |     |
|                                         | 2-Aminoanthracene        | 10.0     |                 |     |       |     |                 |    |        |    | 1053  | 187 |

|                                          | Treatment Group          | µg/plate | TA98            |     | TA100 |     | TA1535 |    | TA1537 |    | TA102 |     |
|------------------------------------------|--------------------------|----------|-----------------|-----|-------|-----|--------|----|--------|----|-------|-----|
|                                          |                          |          | Mean            | SD  | Mean  | SD  | Mean   | SD | Mean   | SD | Mean  | SD  |
| Autumn Tobacco (18 mg/mL)<br>Non Intense | WITHOUT ACTIVATION       |          |                 |     |       |     |        |    |        |    |       |     |
|                                          | 200 Proof Ethanol        | 100 µL   | 17              | 4   | 97    | 10  | 8      | 3  | 6      | 4  | 349   | 17  |
|                                          | 2-Nitrofluorene          | 2.5      | 665             | 56  |       |     |        |    |        |    |       |     |
|                                          | Sodium Azide             | 1.0      |                 |     | 645   | 102 | 657    | 20 |        |    |       |     |
|                                          | ICR-191 Acridine         | 0.5      |                 |     |       |     |        |    | 179    | 23 |       |     |
|                                          | 4-Nitroquinoline-N-oxide | 2.0      |                 |     |       |     |        |    |        |    | 1126  | 113 |
|                                          | WITH ACTIVATION          |          |                 |     |       |     |        |    |        |    |       |     |
|                                          | 200 Proof Ethanol        | 100 µL   | 16              | 4   | 120   | 17  | 10     | 7  | 4      | 1  | 248   | 19  |
|                                          | 2-Aminoanthracene        | 2.5      | 1764            | 186 | 1812  | 397 | 180    | 14 | 239    | 9  |       |     |
|                                          | 2-Aminoanthracene        | 10.0     |                 |     |       |     |        |    |        |    | 2451  | 98  |
| Autumn Tobacco (18 mg/mL)<br>Intense     | WITHOUT ACTIVATION       |          |                 |     |       |     |        |    |        |    |       |     |
|                                          | 200 Proof Ethanol        | 100 µL   | 17              | 4   | 97    | 10  | 8      | 3  | 6      | 4  | 349   | 17  |
|                                          | 2-Nitrofluorene          | 2.5      | 665             | 56  |       |     |        |    |        |    |       |     |
|                                          | Sodium Azide             | 1.0      |                 |     | 645   | 102 | 657    | 20 |        |    |       |     |
|                                          | ICR-191 Acridine         | 0.5      |                 |     |       |     |        |    | 179    | 23 |       |     |
|                                          | 4-Nitroquinoline-N-oxide | 2.0      |                 |     |       |     |        |    |        |    | 1126  | 113 |
|                                          | WITH ACTIVATION          |          |                 |     |       |     |        |    |        |    |       |     |
|                                          | 200 Proof Ethanol        | 100 µL   | 16 <sup>a</sup> | 0   | 98    | 5   | 10     | 7  | 8      | 2  | 325   | 51  |
|                                          | 2-Aminoanthracene        | 2.5      | 2100            | 466 | 1979  | 425 | 180    | 14 | 134    | 66 |       |     |
|                                          | 2-Aminoanthracene        | 10.0     |                 |     |       |     |        |    |        |    | 3230  | 268 |

|                                        | Treatment Group          | µg/plate | TA98 |     | TA100 |     | TA1535 |     | TA1537 |    | TA102            |     |
|----------------------------------------|--------------------------|----------|------|-----|-------|-----|--------|-----|--------|----|------------------|-----|
|                                        |                          |          | Mean | SD  | Mean  | SD  | Mean   | SD  | Mean   | SD | Mean             | SD  |
| Ruby Menthol (18 mg/mL)<br>Non Intense | WITHOUT ACTIVATION       |          |      |     |       |     |        |     |        |    |                  |     |
|                                        | 200 Proof Ethanol        | 100 µL   | 10   | 6   | 95    | 5   | 6      | 2   | 3      | 1  | 217 <sup>a</sup> | 8   |
|                                        | 2-Nitrofluorene          | 2.5      | 852  | 257 |       |     |        |     |        |    |                  |     |
|                                        | Sodium Azide             | 1.0      |      |     | 598   | 28  | 853    | 147 |        |    |                  |     |
|                                        | ICR-191 Acridine         | 0.5      |      |     |       |     |        |     | 99     | 7  |                  |     |
|                                        | 4-Nitroquinoline-N-oxide | 2.0      |      |     |       |     |        |     |        |    | 815              | 110 |
|                                        | WITH ACTIVATION          |          |      |     |       |     |        |     |        |    |                  |     |
|                                        | 200 Proof Ethanol        | 100 µL   | 21   | 7   | 93    | 19  | 7      | 3   | 8      | 5  | 260 <sup>a</sup> | 16  |
|                                        | 2-Aminoanthracene        | 2.5      | 1775 | 240 | 2332  | 480 | 253    | 18  | 400    | 35 |                  |     |
|                                        | 2-Aminoanthracene        | 10.0     |      |     |       |     |        |     |        |    | 2437             | 336 |
| Ruby Menthol (18 mg/mL)<br>Intense     | WITHOUT ACTIVATION       |          |      |     |       |     |        |     |        |    |                  |     |
|                                        | 200 Proof Ethanol        | 100 µL   | 12   | 5   | 97    | 10  | 8      | 3   | 6      | 4  | 217 <sup>a</sup> | 8   |
|                                        | 2-Nitrofluorene          | 2.5      | 560  | 35  |       |     |        |     |        |    |                  |     |
|                                        | Sodium Azide             | 1.0      |      |     | 645   | 102 | 657    | 20  |        |    |                  |     |
|                                        | ICR-191 Acridine         | 0.5      |      |     |       |     |        |     | 179    | 23 |                  |     |
|                                        | 4-Nitroquinoline-N-oxide | 2.0      |      |     |       |     |        |     |        |    | 815              | 110 |
|                                        | WITH ACTIVATION          |          |      |     |       |     |        |     |        |    |                  |     |
|                                        | 200 Proof Ethanol        | 100 µL   | 21   | 7   | 93    | 19  | 7      | 3   | 8      | 5  | 260 <sup>a</sup> | 16  |
|                                        | 2-Aminoanthracene        | 2.5      | 1775 | 240 | 2332  | 480 | 253    | 18  | 400    | 35 |                  |     |
|                                        | 2-Aminoanthracene        | 10.0     |      |     |       |     |        |     |        |    | 2437             | 336 |

|                                          | Treatment Group          | µg/plate | TA98 |     | TA100 |     | TA1535 |    | TA1537 |    | TA102 |     |
|------------------------------------------|--------------------------|----------|------|-----|-------|-----|--------|----|--------|----|-------|-----|
|                                          |                          |          | Mean | SD  | Mean  | SD  | Mean   | SD | Mean   | SD | Mean  | SD  |
| Summer Menthol (18 mg/mL)<br>Non Intense | WITHOUT ACTIVATION       |          |      |     |       |     |        |    |        |    |       |     |
|                                          | 200 Proof Ethanol        | 100 µL   | 14   | 3   | 110   | 15  | 10     | 6  | 15     | 4  | 298   | 8   |
|                                          | 2-Nitrofluorene          | 2.5      | 825  | 72  |       |     |        |    |        |    |       |     |
|                                          | Sodium Azide             | 1.0      |      |     | 349   | 51  | 827    | 68 |        |    |       |     |
|                                          | ICR-191 Acridine         | 0.5      |      |     |       |     |        |    | 84     | 40 |       |     |
|                                          | 4-Nitroquinoline-N-oxide | 2.0      |      |     |       |     |        |    |        |    | 845   | 96  |
|                                          | WITH ACTIVATION          |          |      |     |       |     |        |    |        |    |       |     |
|                                          | 200 Proof Ethanol        | 100 µL   | 17   | 4   | 119   | 7   | 13     | 2  | 21     | 4  | 370   | 55  |
|                                          | 2-Aminoanthracene        | 2.5      | 2189 | 215 | 2412  | 262 | 122    | 25 | 132    | 12 |       |     |
|                                          | 2-Aminoanthracene        | 10.0     |      |     |       |     |        |    |        |    | 2154  | 182 |
| Summer Menthol (18 mg/mL)<br>Intense     | WITHOUT ACTIVATION       |          |      |     |       |     |        |    |        |    |       |     |
|                                          | 200 Proof Ethanol        | 100 µL   | 14   | 3   | 110   | 15  | 10     | 5  | 15     | 4  | 277   | 42  |
|                                          | 2-Nitrofluorene          | 2.5      | 825  | 72  |       |     |        |    |        |    |       |     |
|                                          | Sodium Azide             | 1.0      |      |     | 349   | 51  | 541    | 38 |        |    |       |     |
|                                          | ICR-191 Acridine         | 0.5      |      |     |       |     |        |    | 84     | 40 |       |     |
|                                          | 4-Nitroquinoline-N-oxide | 2.0      |      |     |       |     |        |    |        |    | 1168  | 153 |
|                                          | WITH ACTIVATION          |          |      |     |       |     |        |    |        |    |       |     |
|                                          | 200 Proof Ethanol        | 100 µL   | 17   | 4   | 119   | 7   | 16     | 2  | 21     | 4  | 370   | 55  |
|                                          | 2-Aminoanthracene        | 2.5      | 2189 | 215 | 2412  | 262 | 244    | 45 | 132    | 12 |       |     |
|                                          | 2-Aminoanthracene        | 10.0     |      |     |       |     |        |    |        |    | 2154  | 182 |

Note: Increased mean revertant counts of *S. typhimurium* indicator strains treated with positive control chemicals relative to treatment with vehicle control (ethanol) indicates the sensitivity of the assay.

SD=standard deviation.

<sup>a</sup> Calculated from duplicate plates.

**Figure S3. Mean MN Response (Left Panel) and Cytotoxicity (Right Panel) Of JUUL2 Aerosol Condensates (Non-Intense Puffing Regime) and 3R4F (Non-Intense Puffing Regime) Condensate in the MN Assay at the Short Term (4h) Without (Top) and With Metabolic Activation (Bottom) and Long Term (27h) Treatments Without Metabolic Activation (Middle)**

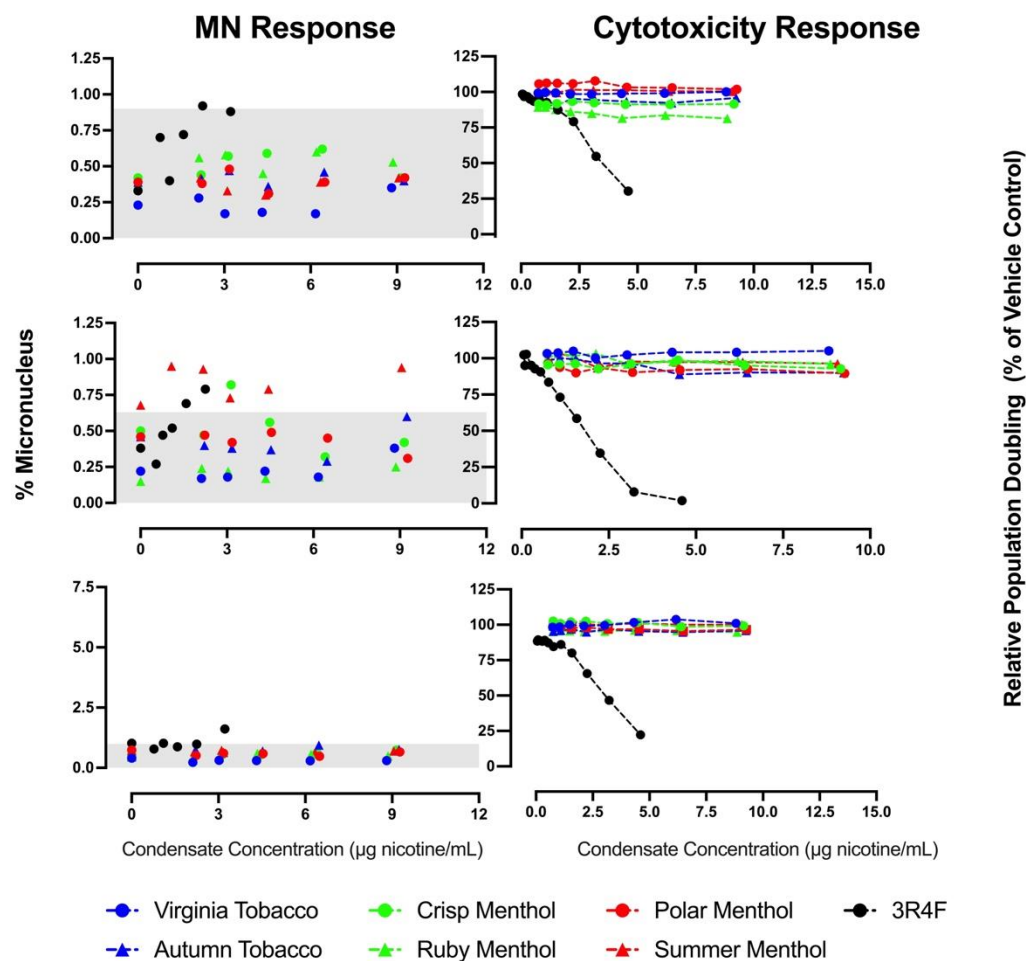

Historical negative control 95% Confidence Interval (%MN): 4hr-S9: 0.00-0.90; 27hr-S9: 0.00-0.63, 4hr+S9: 0.00-0.99. The shaded area denotes the historical negative control 95% Confidence Interval.

**Table S5. Vehicle and Positive Control Mean and SD Micronucleus Counts in MN Assays for all JUUL2 products.**

Virginia Tobacco (18 mg/mL) MN Assay Vehicle and Positive Control Responses

| Treatment (%)                           | Culture | # Nuclei | # MN | Sum Nuclei | Sum MN | MN (%) | SD     |
|-----------------------------------------|---------|----------|------|------------|--------|--------|--------|
| 4-Hour without S9 Metabolic Activation  |         |          |      |            |        |        |        |
| 200 Proof Ethanol (1%)                  | A       | 10000    | 24   | 20000      | 45     | 0.23   | 0.0003 |
|                                         | B       | 10000    | 21   |            |        |        |        |
| MMC 0.0625 µg/mL                        | A       | 10000    | 116  | 20000      | 229    | 1.15   | 0.0008 |
|                                         | B       | 10000    | 113  |            |        |        |        |
| MMC 0.125 µg/mL                         | A       | 10000    | 340  | 20000      | 692    | 3.46   | 0.0013 |
|                                         | B       | 10000    | 352  |            |        |        |        |
| 27-Hour without S9 Metabolic Activation |         |          |      |            |        |        |        |
| 200 Proof Ethanol (1%)                  | A       | 10014    | 21   | 20019      | 44     | 0.22   | 0.0003 |
|                                         | B       | 10005    | 23   |            |        |        |        |
| VIN 0.0025 µg/mL                        | A       | 10017    | 135  | 20046      | 336    | 1.68   | 0.0009 |
|                                         | B       | 10029    | 201  |            |        |        |        |
| VIN 0.003 µg/mL                         | A       | 10000    | 216  | 19998      | 547    | 2.74   | 0.0012 |
|                                         | B       | 9998     | 331  |            |        |        |        |
| 4-Hour with S9 Metabolic Activation     |         |          |      |            |        |        |        |
| 200 Proof Ethanol (1%)                  | A       | 10000    | 40   | 20000      | 79     | 0.40   | 0.0004 |
|                                         | B       | 10000    | 39   |            |        |        |        |
| CP 4.7 µg/mL                            | A       | 10000    | 150  | 20000      | 317    | 1.59   | 0.0009 |
|                                         | B       | 10000    | 167  |            |        |        |        |
| CP 11.9 µg/mL                           | A       | 10000    | 486  | 20000      | 973    | 4.87   | 0.0015 |
|                                         | B       | 10000    | 487  |            |        |        |        |

Note: Increased MN counts in TK6 Cultures treated with positive control chemicals relative to treatment with vehicle control (ethanol) indicates the sensitivity of the assay.

CP = Cyclophosphamide Monohydrate; MMC = Mitomycin C; MN = Micronuclei; VIN = Vinblastine Sulfate.



## Crisp Menthol MN Assay Vehicle and Positive Control Responses

| Treatment (%)                           | Culture | # Nuclei | # MN | Sum Nuclei | Sum MN | MN (%) | SD     |
|-----------------------------------------|---------|----------|------|------------|--------|--------|--------|
| 4-Hour without S9 Metabolic Activation  |         |          |      |            |        |        |        |
| 200 Proof Ethanol (1%)                  | A       | 10025    | 53   | 20164      | 84     | 0.42   | 0.0005 |
|                                         | B       | 10139    | 31   |            |        |        |        |
| MMC 0.0625 µg/mL                        | A       | 10259    | 271  | 20294      | 494    | 2.43   | 0.0011 |
|                                         | B       | 10035    | 223  |            |        |        |        |
| MMC 0.125 µg/mL                         | A       | 10074    | 562  | 20234      | 1316   | 6.50   | 0.0017 |
|                                         | B       | 10160    | 754  |            |        |        |        |
| 27-Hour without S9 Metabolic Activation |         |          |      |            |        |        |        |
| 200 Proof Ethanol (1%)                  | A       | 10020    | 25   | 20127      | 100    | 0.50   | 0.0005 |
|                                         | B       | 10107    | 75   |            |        |        |        |
| VIN 0.0025 µg/mL                        | A       | 10121    | 527  | 20299      | 977    | 4.81   | 0.0015 |
|                                         | B       | 10178    | 450  |            |        |        |        |
| VIN 0.003 µg/mL                         | A       | 10093    | 519  | 20158      | 1078   | 5.35   | 0.0016 |
|                                         | B       | 10065    | 559  |            |        |        |        |
| 4-Hour with S9 Metabolic Activation     |         |          |      |            |        |        |        |
| 200 Proof Ethanol (1%)                  | A       | 10020    | 52   | 20034      | 108    | 0.54   | 0.0005 |
|                                         | B       | 10014    | 56   |            |        |        |        |
| CP 4.7 µg/mL                            | A       | 10021    | 219  | 20075      | 446    | 2.22   | 0.0010 |
|                                         | B       | 10054    | 227  |            |        |        |        |
| CP 11.9 µg/mL                           | A       | 10187    | 1020 | 20309      | 1912   | 9.41   | 0.0020 |
|                                         | B       | 10122    | 892  |            |        |        |        |

Note: Increased MN counts in TK6 Cultures treated with positive control chemicals relative to treatment with vehicle control (ethanol) indicates the sensitivity of the assay.

CP = Cyclophosphamide Monohydrate; MMC = Mitomycin C; MN = Micronuclei; VIN = Vinblastine Sulfate.

## Polar Menthol MN Assay Vehicle and Positive Control Responses

| Treatment (%)                           | Culture | # Nuclei | # MN | Sum Nuclei | Sum MN | MN (%) | SD     |
|-----------------------------------------|---------|----------|------|------------|--------|--------|--------|
| 4-Hour without S9 Metabolic Activation  |         |          |      |            |        |        |        |
| 200 Proof Ethanol (1%)                  | A       | 10168    | 40   | 20288      | 79     | 0.39   | 0.0004 |
|                                         | B       | 10120    | 39   |            |        |        |        |
| MMC 0.0625 µg/mL                        | A       | 10398    | 163  | 20781      | 380    | 1.83   | 0.0009 |
|                                         | B       | 10383    | 217  |            |        |        |        |
| MMC 0.125 µg/mL                         | A       | 10693    | 660  | 21491      | 1355   | 6.30   | 0.0017 |
|                                         | B       | 10798    | 695  |            |        |        |        |
| 27-Hour without S9 Metabolic Activation |         |          |      |            |        |        |        |
| 200 Proof Ethanol (1%)                  | A       | 10145    | 60   | 20224      | 93     | 0.46   | 0.0005 |
|                                         | B       | 10079    | 33   |            |        |        |        |
| VIN 0.0025 µg/mL                        | A       | 10226    | 455  | 20405      | 819    | 4.01   | 0.0014 |
|                                         | B       | 10179    | 364  |            |        |        |        |
| VIN 0.003 µg/mL                         | A       | 10435    | 469  | 20727      | 912    | 4.40   | 0.0014 |
|                                         | B       | 10292    | 443  |            |        |        |        |
| 4-Hour with S9 Metabolic Activation     |         |          |      |            |        |        |        |
| 200 Proof Ethanol (1%)                  | A       | 10263    | 71   | 20364      | 150    | 0.74   | 0.0006 |
|                                         | B       | 10101    | 79   |            |        |        |        |
| CP 4.7 µg/mL                            | A       | 10287    | 202  | 20777      | 394    | 1.90   | 0.0009 |
|                                         | B       | 10490    | 192  |            |        |        |        |
| CP 11.9 µg/mL                           | A       | 11512    | 884  | 22556      | 1775   | 7.87   | 0.0018 |
|                                         | B       | 11044    | 891  |            |        |        |        |

Note: Increased MN counts in TK6 Cultures treated with positive control chemicals relative to treatment with vehicle control (ethanol) indicates the sensitivity of the assay.

CP = Cyclophosphamide Monohydrate; MMC = Mitomycin C; MN = Micronuclei; VIN = Vinblastine Sulfate.

## Autumn Tobacco MN Assay Vehicle and Positive Control Responses

| Treatment (%)                           | Culture | # Nuclei | # MN | Sum Nuclei | Sum MN | MN (%) | SD     |
|-----------------------------------------|---------|----------|------|------------|--------|--------|--------|
| 4-Hour without S9 Metabolic Activation  |         |          |      |            |        |        |        |
| 200 Proof Ethanol (1%)                  | A       | 10000    | 42   | 20000      | 77     | 0.39   | 0.0004 |
|                                         | B       | 10000    | 35   |            |        |        |        |
| MMC 0.0625 µg/mL                        | A       | 10000    | 257  | 20000      | 483    | 2.42   | 0.0011 |
|                                         | B       | 10000    | 226  |            |        |        |        |
| MMC 0.125 µg/mL                         | A       | 10000    | 529  | 20000      | 1032   | 5.16   | 0.0016 |
|                                         | B       | 10000    | 503  |            |        |        |        |
| 27-Hour without S9 Metabolic Activation |         |          |      |            |        |        |        |
| 200 Proof Ethanol (1%)                  | A       | 10000    | 55   | 20000      | 92     | 0.46   | 0.0005 |
|                                         | B       | 10000    | 37   |            |        |        |        |
| VIN 0.0025 µg/mL                        | A       | 10000    | 1583 | 20000      | 4011   | 20.06  | 0.0028 |
|                                         | B       | 10000    | 2428 |            |        |        |        |
| VIN 0.003 µg/mL                         | A       | 10000    | 2163 | 20000      | 4131   | 20.66  | 0.0029 |
|                                         | B       | 10000    | 1968 |            |        |        |        |
| 4-Hour with S9 Metabolic Activation     |         |          |      |            |        |        |        |
| 200 Proof Ethanol (1%)                  | A       | 10000    | 42   | 20000      | 96     | 0.48   | 0.0005 |
|                                         | B       | 10000    | 54   |            |        |        |        |
| CP 4.7 µg/mL                            | A       | 10000    | 687  | 20000      | 1332   | 6.66   | 0.0018 |
|                                         | B       | 10000    | 645  |            |        |        |        |
| CP 11.9 µg/mL                           | A       | 10000    | 2098 | 20000      | 3988   | 19.94  | 0.0028 |
|                                         | B       | 10000    | 1890 |            |        |        |        |

Note: Increased MN counts in TK6 Cultures treated with positive control chemicals relative to treatment with vehicle control (ethanol) indicates the sensitivity of the assay.

CP = Cyclophosphamide Monohydrate; MMC = Mitomycin C; MN = Micronuclei; VIN = Vinblastine Sulfate.

## Ruby Menthol MN Assay Vehicle and Positive Control Responses

| Treatment (%)                           | Culture | # Nuclei | # MN | Sum Nuclei | Sum MN | MN (%) | SD     |
|-----------------------------------------|---------|----------|------|------------|--------|--------|--------|
| 4-Hour without S9 Metabolic Activation  |         |          |      |            |        |        |        |
| 200 Proof Ethanol (1%)                  | A       | 10000    | 34   | 20000      | 76     | 0.38   | 0.0004 |
|                                         | B       | 10000    | 42   |            |        |        |        |
| MMC 0.0625 µg/mL                        | A       | 10000    | 206  | 20000      | 407    | 2.04   | 0.0010 |
|                                         | B       | 10000    | 201  |            |        |        |        |
| MMC 0.125 µg/mL                         | A       | 10000    | 523  | 20000      | 1111   | 5.56   | 0.0016 |
|                                         | B       | 10000    | 588  |            |        |        |        |
| 27-Hour without S9 Metabolic Activation |         |          |      |            |        |        |        |
| 200 Proof Ethanol (1%)                  | A       | 10000    | 21   | 20000      | 29     | 0.15   | 0.0003 |
|                                         | B       | 10000    | 8    |            |        |        |        |
| VIN 0.0025 µg/mL                        | A       | 10000    | 216  | 20000      | 457    | 2.29   | 0.0011 |
|                                         | B       | 10000    | 241  |            |        |        |        |
| VIN 0.003 µg/mL                         | A       | 10000    | 454  | 20000      | 900    | 4.50   | 0.0015 |
|                                         | B       | 10000    | 446  |            |        |        |        |
| 4-Hour with S9 Metabolic Activation     |         |          |      |            |        |        |        |
| 200 Proof Ethanol (1%)                  | A       | 10000    | 45   | 20000      | 88     | 0.44   | 0.0005 |
|                                         | B       | 10000    | 43   |            |        |        |        |
| CP 4.7 µg/mL                            | A       | 10000    | 608  | 20000      | 1098   | 5.49   | 0.0016 |
|                                         | B       | 10000    | 490  |            |        |        |        |
| CP 11.9 µg/mL                           | A       | 7315     | 990  | 10797      | 1505   | 13.94  | 0.0033 |
|                                         | B       | 3482     | 515  |            |        |        |        |

Note: Increased MN counts in TK6 Cultures treated with positive control chemicals relative to treatment with vehicle control (ethanol) indicates the sensitivity of the assay.

CP = Cyclophosphamide Monohydrate; MMC = Mitomycin C; MN = Micronuclei; VIN = Vinblastine Sulfate.

## Summer Menthol MN Assay Vehicle and Positive Control Responses

| Treatment (%)                           | Culture | # Nuclei | # MN | Sum Nuclei | Sum MN | MN (%) | SD     |
|-----------------------------------------|---------|----------|------|------------|--------|--------|--------|
| 4-Hour without S9 Metabolic Activation  |         |          |      |            |        |        |        |
| 200 Proof Ethanol (1%)                  | A       | 10017    | 41   | 20017      | 71     | 0.35   | 0.0004 |
|                                         | B       | 10000    | 30   |            |        |        |        |
| MMC 0.0625 µg/mL                        | A       | 10000    | 271  | 20000      | 559    | 2.80   | 0.0012 |
|                                         | B       | 10000    | 288  |            |        |        |        |
| MMC 0.125 µg/mL                         | A       | 10000    | 749  | 20000      | 1473   | 7.37   | 0.0018 |
|                                         | B       | 10000    | 724  |            |        |        |        |
| 27-Hour without S9 Metabolic Activation |         |          |      |            |        |        |        |
| 200 Proof Ethanol (1%)                  | A       | 10000    | 67   | 20000      | 136    | 0.68   | 0.0006 |
|                                         | B       | 10000    | 69   |            |        |        |        |
| VIN 0.0025 µg/mL                        | A       | 10000    | 648  | 20000      | 1096   | 5.48   | 0.0016 |
|                                         | B       | 10000    | 448  |            |        |        |        |
| VIN 0.003 µg/mL                         | A       | 10000    | 690  | 20000      | 1392   | 6.96   | 0.0018 |
|                                         | B       | 10000    | 702  |            |        |        |        |
| 4-Hour with S9 Metabolic Activation     |         |          |      |            |        |        |        |
| 200 Proof Ethanol (1%)                  | A       | 10000    | 71   | 20000      | 143    | 0.72   | 0.0006 |
|                                         | B       | 10000    | 72   |            |        |        |        |
| CP 4.7 µg/mL                            | A       | 10000    | 531  | 20000      | 1113   | 5.57   | 0.0016 |
|                                         | B       | 10000    | 582  |            |        |        |        |
| CP 11.9 µg/mL                           | A       | 10000    | 1425 | 20000      | 2930   | 14.65  | 0.0025 |
|                                         | B       | 10000    | 1505 |            |        |        |        |

Note: Increased MN counts in TK6 Cultures treated with positive control chemicals relative to treatment with vehicle control (ethanol) indicates the sensitivity of the assay.

CP = Cyclophosphamide Monohydrate; MMC = Mitomycin C; MN = Micronuclei; VIN = Vinblastine Sulfate.
