# Supplementary material for: A Practical Framework for Novel Electronic Nicotine Delivery System Evaluation: Chemical and Toxicological Characterization of JUUL2 Aerosol and Comparison with Reference Cigarettes
Source: MDPI journal article supplement (doi:10.3390/toxics12010041), 2024-01-04
Supplement: s1 [file s1]

## *Supplementary Materials File S3*

### 1 Non-Intense and Intense Per Collection Analytical Stability Results

#### 1.1 Virginia Tobacco 18 mg/mL Non-Intense Per Collection Analytical Stability Results

| Parameter/<br>Constituent   | Units          | T0     |       | T3     |       | T6     |       | T9     |       | T12    |       |
|-----------------------------|----------------|--------|-------|--------|-------|--------|-------|--------|-------|--------|-------|
| # of puffs                  | NA             | 150    |       | 134    |       | 141    |       | 132    |       | 114    |       |
| pH                          | NA             | 6.01   | 0.03  | 6.19   | 0.06  | 6.14   | 0.03  | 5.90   | 0.03  | 5.93   | 0.02  |
| Primary Constituents        |                | Mean   | SD    |
| Nicotine                    | mg/collection  | 18.37  | 1.50  | 16.81  | 0.63  | 17.59  | 1.09  | 18.73  | 0.74  | 15.78  | 0.43  |
| Glycerol                    | mg/collection  | 700.87 | 61.10 | 704.93 | 22.99 | 709.29 | 51.07 | 788.91 | 33.42 | 686.60 | 30.83 |
| Propylene Glycol            | mg/collection  | 438.43 | 36.56 | 420.23 | 16.52 | 430.05 | 27.37 | 457.94 | 18.08 | 390.86 | 9.29  |
| Water                       | mg/collection  | 83.01  | 6.33  | 94.60  | 1.51  | 99.93  | 3.65  | 87.42  | 1.67  | 82.23  | 2.11  |
| Menthol                     | mg/collection  | BLOD   | NA    | BLOQ   | NA    | BLOD   | NA    | BLOD   | NA    | BLOQ   | NA    |
| Diethylene Glycol           | mg/collection  | BLOD   | NA    |
| Ethylene Glycol             | mg/collection  | BLOD   | NA    |
| Carbonyls & Glycidol        |                | Mean   | SD    |
| Acetaldehyde                | mcg/collection | 3.54   | 0.42  | 2.83   | 0.47  | 3.19   | 0.59  | 4.05   | 0.42  | 4.32   | 0.36  |
| Acrolein                    | mcg/collection | 1.62   | 0.38  | 1.21   | 0.55  | BLOQ   | NA    | BLOQ   | NA    | 2.81   | 0.27  |
| Diacetyl                    | mcg/collection | BLOQ   | NA    | BLOQ   | NA    | BLOD   | NA    | BLOD   | NA    | BLOQ   | NA    |
| Formaldehyde                | mcg/collection | 15.47  | 2.36  | 16.00  | 1.96  | 15.29  | 3.40  | 19.55  | 1.53  | 17.87  | 0.33  |
| Glycidol                    | mcg/collection | 4.11   | 0.41  | 3.29   | 0.61  | 4.21   | 0.68  | 4.40   | 0.35  | 3.09   | 0.26  |
| Acetyl Propionyl            | mcg/collection | BLOD   | NA    |
| Butyraldehyde               | mcg/collection | BLOD   | NA    |
| Crotonaldehyde              | mcg/collection | BLOD   | NA    |
| Furfural                    | mcg/collection | BLOD   | NA    |
| Nicotine Degradants & TSNAs |                | Mean   | SD    |

## Supplementary Material

|                         |                |             |           |             |           |             |           |             |           |             |           |
|-------------------------|----------------|-------------|-----------|-------------|-----------|-------------|-----------|-------------|-----------|-------------|-----------|
| <b>β-Nicotyrine</b>     | mcg/collection | 1.55        | 0.06      | 1.16        | 0.08      | 1.33        | 0.19      | 2.53        | 0.10      | 1.75        | 0.10      |
| <b>Cotinine</b>         | mcg/collection | 34.27       | 2.05      | 40.53       | 3.84      | 31.71       | 5.05      | 39.19       | 1.68      | 35.46       | 2.10      |
| <b>Myosmine</b>         | mcg/collection | 31.51       | 1.77      | 33.50       | 3.02      | 28.04       | 4.32      | 30.22       | 1.18      | 26.10       | 1.41      |
| <b>Nicotine N Oxide</b> | mcg/collection | BLOQ        | NA        | BLOQ        | NA        | 1.36        | 0.86      | BLOQ        | NA        | BLOQ        | NA        |
| <b>Nornicotine</b>      | mcg/collection | 6.10        | 0.45      | 9.21        | 0.76      | 9.85        | 1.61      | 12.40       | 0.57      | 12.49       | 0.91      |
| <b>Anabasine</b>        | mcg/collection | BLOD        | NA        |
| <b>Anatabine</b>        | mcg/collection | BLOD        | NA        | BLOD        | NA        | BLOD        | NA        | BLOQ        | NA        | BLOD        | NA        |
| <b>NNK</b>              | mcg/collection | BLOQ        | NA        | NT          | NT        | NT          | NT        | NT          | NT        | NT          | NT        |
| <b>NNN</b>              | mcg/collection | BLOD        | NA        | NT          | NT        | NT          | NT        | NT          | NT        | NT          | NT        |
| <b>Metals</b>           |                | <b>Mean</b> | <b>SD</b> |
| <b>Arsenic</b>          | ng/collection  | BLOD        | NA        | BLOQ        | NA        | BLOD        | NA        | BLOQ        | NA        | BLOD        | NA        |
| <b>Beryllium</b>        | ng/collection  | BLOD        | NA        |
| <b>Cadmium</b>          | ng/collection  | BLOD        | NA        |
| <b>Chromium</b>         | ng/collection  | BLOQ        | NA        | BLOD        | NA        | BLOD        | NA        | BLOD        | NA        | BLOQ        | NA        |
| <b>Cobalt</b>           | ng/collection  | BLOD        | NA        |
| <b>Copper</b>           | ng/collection  | BLOQ        | NA        | BLOD        | NA        | BLOD        | NA        | BLOD        | NA        | BLOD        | NA        |
| <b>Gold</b>             | ng/collection  | BLOD        | NA        | NT          | NT        | NT          | NT        | NT          | NT        | NT          | NT        |
| <b>Iron</b>             | ng/collection  | BLOQ        | NA        | BLOD        | NA        | BLOD        | NA        | BLOD        | NA        | BLOD        | NA        |
| <b>Lead</b>             | ng/collection  | BLOD        | NA        |
| <b>Nickel</b>           | ng/collection  | BLOD        | NA        |
| <b>Selenium</b>         | ng/collection  | BLOQ        | NA        | 23.49       | 12.51     | BLOQ        | NA        | BLOQ        | NA        | BLOQ        | NA        |
| <b>Silver</b>           | ng/collection  | BLOD        | NA        |
| <b>Tin</b>              | ng/collection  | BLOQ        | NA        | BLOD        | NA        | BLOD        | NA        | BLOQ        | NA        | BLOD        | NA        |
| <b>Zinc</b>             | ng/collection  | BLOQ        | NA        | BLOD        | NA        | BLOD        | NA        | BLOD        | NA        | BLOD        | NA        |
| <b>Organic Acids</b>    |                | <b>Mean</b> | <b>SD</b> |
| <b>Benzoic Acid</b>     | mg/collection  | 9.86        | 1.09      | 8.24        | 0.42      | 9.97        | 0.31      | 9.30        | 0.39      | 8.30        | 0.59      |
| <b>Propionic Acid</b>   | mcg/collection | BLOD        | NA        | BLOD        | NA        | BLOD        | NA        | BLOQ        | NA        | BLOD        | NA        |
| <b>VOCs</b>             |                | <b>Mean</b> | <b>SD</b> |

|                              |                |             |           |             |           |             |           |             |           |             |           |
|------------------------------|----------------|-------------|-----------|-------------|-----------|-------------|-----------|-------------|-----------|-------------|-----------|
| <b>1,3-Butadiene</b>         | mcg/collection | BLOD        | NA        | NT          | NT        | NT          | NT        | NT          | NT        | NT          | NT        |
| <b>Acrylonitrile</b>         | mcg/collection | BLOD        | NA        | NT          | NT        | NT          | NT        | NT          | NT        | NT          | NT        |
| <b>Benzene</b>               | mcg/collection | BLOD        | NA        | NT          | NT        | NT          | NT        | NT          | NT        | NT          | NT        |
| <b>Isoprene</b>              | mcg/collection | BLOD        | NA        | NT          | NT        | NT          | NT        | NT          | NT        | NT          | NT        |
| <b>Propylene Oxide</b>       | mcg/collection | BLOD        | NA        | NT          | NT        | NT          | NT        | NT          | NT        | NT          | NT        |
| <b>Toluene</b>               | mcg/collection | BLOQ        | NA        | NT          | NT        | NT          | NT        | NT          | NT        | NT          | NT        |
| <b>Esters &amp; Alcohols</b> |                | <b>Mean</b> | <b>SD</b> |
| <b>1-Butanol</b>             | mcg/collection | BLOD        | NA        | NT          | NT        | NT          | NT        | NT          | NT        | NT          | NT        |
| <b>Benzyl Acetate</b>        | mcg/collection | BLOD        | NA        | NT          | NT        | NT          | NT        | NT          | NT        | NT          | NT        |
| <b>Ethyl Acetate</b>         | mcg/collection | BLOD        | NA        | NT          | NT        | NT          | NT        | NT          | NT        | NT          | NT        |
| <b>Ethyl Acetoacetate</b>    | mcg/collection | BLOD        | NA        | NT          | NT        | NT          | NT        | NT          | NT        | NT          | NT        |
| <b>Isoamyl Acetate</b>       | mcg/collection | BLOD        | NA        | NT          | NT        | NT          | NT        | NT          | NT        | NT          | NT        |
| <b>Isobutyl Acetate</b>      | mcg/collection | BLOD        | NA        | NT          | NT        | NT          | NT        | NT          | NT        | NT          | NT        |
| <b>Methyl Acetate</b>        | mcg/collection | BLOD        | NA        | NT          | NT        | NT          | NT        | NT          | NT        | NT          | NT        |

## 1.2 Virginia Tobacco 18 mg/mL Intense Per Collection Analytical Stability Results

| Parameter/<br>Constituent    | Units         | T0          |           | T3          |           | T6          |           | T9          |           | T12         |           |
|------------------------------|---------------|-------------|-----------|-------------|-----------|-------------|-----------|-------------|-----------|-------------|-----------|
| <b># of puffs</b>            | NA            | 85 (*86)    |           | 86          |           | 87          |           | 84          |           | 83          |           |
| <b>pH</b>                    | NA            | 6.17        | 0.02      | 6.46        | 0.04      | 5.96        | 0.04      | 6.17        | 0.12      | 5.96        | 0.08      |
| <b>*Primary Constituents</b> |               | <b>Mean</b> | <b>SD</b> |
| <b>Nicotine</b>              | mg/collection | 17.55       | 1.18      | 18.35       | 0.82      | 18.07       | 1.11      | 17.82       | 2.62      | 16.82       | 2.66      |
| <b>Glycerol</b>              | mg/collection | 662.20      | 41.85     | 756.14      | 32.64     | 743.65      | 40.63     | 722.64      | 90.53     | 698.73      | 98.83     |
| <b>Propylene Glycol</b>      | mg/collection | 420.44      | 27.99     | 463.43      | 20.45     | 445.13      | 28.01     | 445.16      | 64.40     | 415.85      | 66.08     |
| <b>Water</b>                 | mg/collection | 69.63       | 1.85      | 84.55       | 2.02      | 82.28       | 3.34      | 89.10       | 4.98      | 81.48       | 6.26      |
| <b>Menthol</b>               | mg/collection | BLOD        | NA        |
| <b>Diethylene Glycol</b>     | mg/collection | BLOD        | NA        |
| <b>Ethylene Glycol</b>       | mg/collection | BLOD        | NA        |

| Carbonyls & Glycidol        |                | Mean  | SD    | Mean  | SD   | Mean  | SD   | Mean  | SD   | Mean  | SD   |
|-----------------------------|----------------|-------|-------|-------|------|-------|------|-------|------|-------|------|
| Acetaldehyde                | mcg/collection | 4.49  | 0.39  | 3.85  | 0.47 | 4.16  | 0.10 | 4.44  | 0.55 | 6.66  | 0.51 |
| Acrolein                    | mcg/collection | 3.17  | 0.42  | 2.32  | 0.43 | 2.06  | 0.19 | 2.20  | 1.31 | 6.82  | 0.58 |
| Diacetyl                    | mcg/collection | BLOQ  | NA    | BLOQ  | NA   | BLOQ  | NA   | BLOD  | NA   | BLOQ  | NA   |
| Formaldehyde                | mcg/collection | 22.81 | 1.07  | 21.66 | 2.51 | 22.93 | 0.88 | 23.06 | 5.93 | 24.95 | 1.13 |
| Glycidol                    | mcg/collection | 5.91  | 2.22  | 3.88  | 0.81 | 5.33  | 0.78 | 3.75  | 0.66 | 4.45  | 0.36 |
| Acetyl Propionyl            | mcg/collection | BLOD  | NA    | BLOD  | NA   | BLOD  | NA   | BLOD  | NA   | BLOD  | NA   |
| Butyraldehyde               | mcg/collection | BLOD  | NA    | BLOD  | NA   | BLOQ  | NA   | BLOD  | NA   | BLOD  | NA   |
| Crotonaldehyde              | mcg/collection | BLOD  | NA    | BLOD  | NA   | BLOD  | NA   | BLOD  | NA   | BLOD  | NA   |
| Furfural                    | mcg/collection | BLOD  | NA    | BLOD  | NA   | BLOD  | NA   | BLOQ  | NA   | BLOD  | NA   |
| Nicotine Degradants & TSNAs |                | Mean  | SD    | Mean  | SD   | Mean  | SD   | Mean  | SD   | Mean  | SD   |
| β-Nicotyrine                | mcg/collection | 2.40  | 0.35  | 2.13  | 0.10 | 2.87  | 0.18 | 3.09  | 0.86 | 2.39  | 0.19 |
| Cotinine                    | mcg/collection | 35.45 | 3.73  | 36.39 | 2.88 | 41.42 | 2.15 | 34.43 | 9.22 | 42.75 | 2.24 |
| Myosmine                    | mcg/collection | 33.03 | 3.54  | 29.96 | 2.29 | 35.74 | 1.53 | 26.35 | 6.61 | 32.27 | 1.89 |
| Nicotine N Oxide            | mcg/collection | BLOQ  | NA    | BLOQ  | NA   | 1.14  | 0.07 | BLOQ  | NA   | BLOQ  | NA   |
| Nornicotine                 | mcg/collection | 6.59  | 0.66  | 8.04  | 0.86 | 11.98 | 0.89 | 10.82 | 3.18 | 14.64 | 0.83 |
| Anabasine                   | mcg/collection | BLOD  | NA    | BLOD  | NA   | BLOD  | NA   | BLOD  | NA   | BLOD  | NA   |
| Anatabine                   | mcg/collection | BLOD  | NA    | BLOD  | NA   | BLOD  | NA   | BLOQ  | NA   | BLOD  | NA   |
| NNK                         | mcg/collection | BLOQ  | NA    | NT    | NT   | NT    | NT   | NT    | NT   | NT    | NT   |
| NNN                         | mcg/collection | BLOD  | NA    | NT    | NT   | NT    | NT   | NT    | NT   | NT    | NT   |
| Metals                      |                | Mean  | SD    | Mean  | SD   | Mean  | SD   | Mean  | SD   | Mean  | SD   |
| Arsenic                     | ng/collection  | BLOD  | NA    | BLOD  | NA   | BLOD  | NA   | BLOD  | NA   | BLOD  | NA   |
| Beryllium                   | ng/collection  | BLOD  | NA    | BLOD  | NA   | BLOD  | NA   | BLOD  | NA   | BLOD  | NA   |
| Cadmium                     | ng/collection  | BLOD  | NA    | BLOD  | NA   | BLOD  | NA   | BLOD  | NA   | BLOD  | NA   |
| Chromium                    | ng/collection  | 72.07 | 50.94 | BLOD  | NA   | BLOD  | NA   | BLOD  | NA   | BLOD  | NA   |
| Cobalt                      | ng/collection  | BLOD  | NA    | BLOD  | NA   | BLOD  | NA   | BLOD  | NA   | BLOD  | NA   |
| Copper                      | ng/collection  | BLOD  | NA    | BLOD  | NA   | BLOD  | NA   | BLOD  | NA   | BLOD  | NA   |
| Gold                        | ng/collection  | BLOD  | NA    | NT    | NT   | NT    | NT   | NT    | NT   | NT    | NT   |

|                              |                |             |           |             |           |             |           |             |           |             |           |
|------------------------------|----------------|-------------|-----------|-------------|-----------|-------------|-----------|-------------|-----------|-------------|-----------|
| <b>Iron</b>                  | ng/collection  | 596.74      | 475.36    | BLOD        | NA        | BLOD        | NA        | BLOD        | NA        | BLOD        | NA        |
| <b>Lead</b>                  | ng/collection  | BLOD        | NA        |
| <b>Nickel</b>                | ng/collection  | BLOQ        | NA        | BLOD        | NA        | BLOD        | NA        | BLOD        | NA        | BLOD        | NA        |
| <b>Selenium</b>              | ng/collection  | BLOQ        | NA        |
| <b>Silver</b>                | ng/collection  | BLOD        | NA        | BLOQ        | NA        | BLOD        | NA        | BLOD        | NA        | BLOD        | NA        |
| <b>Tin</b>                   | ng/collection  | BLOQ        | NA        | BLOQ        | NA        | BLOQ        | NA        | BLOD        | NA        | BLOD        | NA        |
| <b>Zinc</b>                  | ng/collection  | BLOD        | NA        |
| <b>Organic Acids</b>         |                | <b>Mean</b> | <b>SD</b> |
| <b>Benzoic Acid</b>          | mg/collection  | 9.31        | 1.17      | 11.47       | 0.74      | 14.17       | 1.77      | 11.52       | 0.82      | 9.86        | 2.22      |
| <b>Propionic Acid</b>        | mcg/collection | BLOD        | NA        | BLOQ        | NA        | BLOD        | NA        | BLOD        | NA        | BLOQ        | NA        |
| <b>VOCs</b>                  |                | <b>Mean</b> | <b>SD</b> |
| <b>1,3-Butadiene</b>         | mcg/collection | BLOD        | NA        | NT          | NT        | NT          | NT        | NT          | NT        | NT          | NT        |
| <b>Acrylonitrile</b>         | mcg/collection | BLOD        | NA        | NT          | NT        | NT          | NT        | NT          | NT        | NT          | NT        |
| <b>Benzene</b>               | mcg/collection | BLOD        | NA        | NT          | NT        | NT          | NT        | NT          | NT        | NT          | NT        |
| <b>Isoprene</b>              | mcg/collection | BLOD        | NA        | NT          | NT        | NT          | NT        | NT          | NT        | NT          | NT        |
| <b>Propylene Oxide</b>       | mcg/collection | BLOD        | NA        | NT          | NT        | NT          | NT        | NT          | NT        | NT          | NT        |
| <b>Toluene</b>               | mcg/collection | BLOQ        | NA        | NT          | NT        | NT          | NT        | NT          | NT        | NT          | NT        |
| <b>Esters &amp; Alcohols</b> |                | <b>Mean</b> | <b>SD</b> |
| <b>1-Butanol</b>             | mcg/collection | BLOD        | NA        | NT          | NT        | NT          | NT        | NT          | NT        | NT          | NT        |
| <b>Benzyl Acetate</b>        | mcg/collection | BLOD        | NA        | NT          | NT        | NT          | NT        | NT          | NT        | NT          | NT        |
| <b>Ethyl Acetate</b>         | mcg/collection | BLOD        | NA        | NT          | NT        | NT          | NT        | NT          | NT        | NT          | NT        |
| <b>Ethyl Acetoacetate</b>    | mcg/collection | BLOD        | NA        | NT          | NT        | NT          | NT        | NT          | NT        | NT          | NT        |
| <b>Isoamyl Acetate</b>       | mcg/collection | BLOD        | NA        | NT          | NT        | NT          | NT        | NT          | NT        | NT          | NT        |
| <b>Isobutyl Acetate</b>      | mcg/collection | BLOD        | NA        | NT          | NT        | NT          | NT        | NT          | NT        | NT          | NT        |
| <b>Methyl Acetate</b>        | mcg/collection | BLOD        | NA        | NT          | NT        | NT          | NT        | NT          | NT        | NT          | NT        |

### 1.3 Crisp Menthol 18 mg/mL Non-Intense Per Collection Analytical Stability Results

| Parameter/<br>Constituent   | Units          | T0     |       | T3     |       | T6     |       | T9     |        | T12    |       |
|-----------------------------|----------------|--------|-------|--------|-------|--------|-------|--------|--------|--------|-------|
| # of puffs                  | NA             | 125    |       | 112    |       | 121    |       | 120    |        | 115    |       |
| pH                          | NA             | 6.26   | 0.03  | 6.36   | 0.02  | 6.33   | 0.02  | 6.30   | 0.06   | 6.11   | 0.06  |
| Primary Constituents        |                | Mean   | SD    | Mean   | SD    | Mean   | SD    | Mean   | SD     | Mean   | SD    |
| Nicotine                    | mg/collection  | 17.52  | 0.72  | 16.57  | 1.37  | 16.72  | 0.68  | 17.07  | 2.66   | 16.22  | 0.43  |
| Glycerol                    | mg/collection  | 447.80 | 20.89 | 444.82 | 36.58 | 430.90 | 19.42 | 450.65 | 69.80  | 429.32 | 10.68 |
| Propylene Glycol            | mg/collection  | 609.23 | 27.86 | 624.50 | 52.74 | 635.13 | 41.91 | 641.90 | 100.91 | 594.88 | 16.17 |
| Water                       | mg/collection  | 78.21  | 3.71  | 62.73  | 3.29  | 73.73  | 4.35  | 69.39  | 5.58   | 75.50  | 6.89  |
| Menthol                     | mg/collection  | 12.57  | 0.65  | 12.05  | 1.04  | 11.98  | 0.47  | 12.61  | 2.07   | 11.41  | 0.31  |
| Diethylene Glycol           | mg/collection  | BLOD   | NA    | BLOD   | NA    | BLOD   | NA    | BLOD   | NA     | BLOD   | NA    |
| Ethylene Glycol             | mg/collection  | BLOD   | NA    | BLOD   | NA    | BLOD   | NA    | BLOD   | NA     | BLOD   | NA    |
| Carbonyls & Glycidol        |                | Mean   | SD    | Mean   | SD    | Mean   | SD    | Mean   | SD     | Mean   | SD    |
| Acetaldehyde                | mcg/collection | 2.40   | 0.32  | 2.65   | 0.65  | 2.67   | 0.33  | 2.50   | 0.21   | 2.70   | 0.48  |
| Acrolein                    | mcg/collection | BLOQ   | NA    | BLOQ   | NA    | BLOQ   | NA    | BLOQ   | NA     | 1.72   | 0.70  |
| Diacetyl                    | mcg/collection | BLOQ   | NA    | BLOQ   | NA    | BLOQ   | NA    | BLOD   | NA     | BLOQ   | NA    |
| Formaldehyde                | mcg/collection | 8.96   | 1.68  | 11.56  | 2.58  | 10.34  | 0.65  | 11.34  | 1.01   | 11.63  | 1.78  |
| Glycidol                    | mcg/collection | 2.90   | 0.19  | 2.09   | 0.14  | 2.33   | 0.39  | 2.69   | 0.65   | 2.67   | 0.70  |
| Acetyl Propionyl            | mcg/collection | BLOD   | NA    | BLOD   | NA    | BLOD   | NA    | BLOD   | NA     | BLOD   | NA    |
| Butyraldehyde               | mcg/collection | BLOD   | NA    | BLOD   | NA    | BLOD   | NA    | BLOD   | NA     | BLOD   | NA    |
| Crotonaldehyde              | mcg/collection | BLOD   | NA    | BLOD   | NA    | BLOD   | NA    | BLOD   | NA     | BLOD   | NA    |
| Furfural                    | mcg/collection | BLOD   | NA    | BLOD   | NA    | BLOD   | NA    | BLOD   | NA     | BLOD   | NA    |
| Nicotine Degradants & TSNAs |                | Mean   | SD    | Mean   | SD    | Mean   | SD    | Mean   | SD     | Mean   | SD    |
| β-Nicotyrine                | mcg/collection | 1.88   | 0.11  | 2.40   | 0.33  | 2.83   | 0.15  | 4.20   | 0.42   | 3.65   | 0.50  |
| Cotinine                    | mcg/collection | BLOQ   | NA    | BLOQ   | NA    | BLOQ   | NA    | BLOQ   | NA     | BLOQ   | NA    |
| Myosmine                    | mcg/collection | 1.53   | 0.10  | 1.74   | 0.22  | 2.20   | 0.22  | 2.46   | 0.27   | 2.69   | 0.33  |
| Nicotine N Oxide            | mcg/collection | BLOQ   | NA    | 1.64   | 0.70  | 1.35   | 0.49  | 1.76   | 0.32   | 0.98   | 0.28  |
| Nornicotine                 | mcg/collection | 7.21   | 0.38  | 8.93   | 1.64  | 12.83  | 0.69  | 12.39  | 1.28   | 14.35  | 2.19  |
| Anabasine                   | mcg/collection | BLOD   | NA    | BLOD   | NA    | BLOD   | NA    | BLOD   | NA     | BLOD   | NA    |

|                              |                |             |           |             |           |             |           |             |           |             |           |
|------------------------------|----------------|-------------|-----------|-------------|-----------|-------------|-----------|-------------|-----------|-------------|-----------|
| <b>Anatabine</b>             | mcg/collection | BLOD        | NA        |
| <b>NNK</b>                   | mcg/collection | BLOQ        | NA        | NT          | NT        | NT          | NT        | NT          | NT        | NT          | NT        |
| <b>NNN</b>                   | mcg/collection | BLOD        | NA        | NT          | NT        | NT          | NT        | NT          | NT        | NT          | NT        |
| <b>Metals</b>                |                | <b>Mean</b> | <b>SD</b> |
| <b>Arsenic</b>               | ng/collection  | BLOD        | NA        |
| <b>Beryllium</b>             | ng/collection  | BLOD        | NA        |
| <b>Cadmium</b>               | ng/collection  | BLOD        | NA        |
| <b>Chromium</b>              | ng/collection  | BLOQ        | NA        | BLOD        | NA        | BLOD        | NA        | BLOD        | NA        | BLOD        | NA        |
| <b>Cobalt</b>                | ng/collection  | BLOD        | NA        |
| <b>Copper</b>                | ng/collection  | BLOQ        | NA        | BLOD        | NA        | BLOD        | NA        | BLOD        | NA        | BLOD        | NA        |
| <b>Gold</b>                  | ng/collection  | BLOD        | NA        | NT          | NT        | NT          | NT        | NT          | NT        | NT          | NT        |
| <b>Iron</b>                  | ng/collection  | 214.12      | 203.93    | BLOD        | NA        | BLOD        | NA        | BLOD        | NA        | BLOD        | NA        |
| <b>Lead</b>                  | ng/collection  | BLOD        | NA        |
| <b>Nickel</b>                | ng/collection  | BLOD        | NA        |
| <b>Selenium</b>              | ng/collection  | BLOQ        | NA        |
| <b>Silver</b>                | ng/collection  | BLOD        | NA        |
| <b>Tin</b>                   | ng/collection  | BLOQ        | NA        | BLOQ        | NA        | BLOD        | NA        | BLOD        | NA        | BLOD        | NA        |
| <b>Zinc</b>                  | ng/collection  | BLOQ        | NA        | BLOD        | NA        | BLOD        | NA        | BLOD        | NA        | BLOD        | NA        |
| <b>Organic Acids</b>         |                | <b>Mean</b> | <b>SD</b> |
| <b>Benzoic Acid</b>          | mg/collection  | 10.86       | 3.49      | 8.55        | 2.14      | 9.80        | 0.54      | 9.19        | 0.39      | 8.44        | 0.79      |
| <b>Propionic Acid</b>        | mcg/collection | BLOD        | NA        | BLOD        | NA        | BLOD        | NA        | BLOQ        | NA        | BLOQ        | NA        |
| <b>VOCs</b>                  |                | <b>Mean</b> | <b>SD</b> |
| <b>1,3-Butadiene</b>         | mcg/collection | BLOD        | NA        | NT          | NT        | NT          | NT        | NT          | NT        | NT          | NT        |
| <b>Acrylonitrile</b>         | mcg/collection | BLOD        | NA        | NT          | NT        | NT          | NT        | NT          | NT        | NT          | NT        |
| <b>Benzene</b>               | mcg/collection | BLOD        | NA        | NT          | NT        | NT          | NT        | NT          | NT        | NT          | NT        |
| <b>Isoprene</b>              | mcg/collection | BLOD        | NA        | NT          | NT        | NT          | NT        | NT          | NT        | NT          | NT        |
| <b>Propylene Oxide</b>       | mcg/collection | BLOD        | NA        | NT          | NT        | NT          | NT        | NT          | NT        | NT          | NT        |
| <b>Toluene</b>               | mcg/collection | BLOD        | NA        | NT          | NT        | NT          | NT        | NT          | NT        | NT          | NT        |
| <b>Esters &amp; Alcohols</b> |                | <b>Mean</b> | <b>SD</b> |

|                           |                |        |      |    |    |    |    |    |    |    |    |
|---------------------------|----------------|--------|------|----|----|----|----|----|----|----|----|
| <b>1-Butanol</b>          | mcg/collection | BLOD   | NA   | NT |
| <b>Benzyl Acetate</b>     | mcg/collection | BLOD   | NA   | NT |
| <b>Ethyl Acetate</b>      | mcg/collection | 110.62 | 6.75 | NT |
| <b>Ethyl Acetoacetate</b> | mcg/collection | BLOD   | NA   | NT |
| <b>Isoamyl Acetate</b>    | mcg/collection | BLOD   | NA   | NT |
| <b>Isobutyl Acetate</b>   | mcg/collection | BLOD   | NA   | NT |
| <b>Methyl Acetate</b>     | mcg/collection | BLOD   | NA   | NT |

#### 1.4 Crisp Menthol 18 mg/mL Intense Per Collection Analytical Stability Results

| Parameter/<br>Constituent       | Units          | T0          |           | T3          |           | T6          |           | T9          |           | T12         |           |
|---------------------------------|----------------|-------------|-----------|-------------|-----------|-------------|-----------|-------------|-----------|-------------|-----------|
| <b># of puffs</b>               | NA             | 81          |           | 88          |           | 82          |           | 87          |           | 81          |           |
| <b>pH</b>                       | NA             | 6.24        | 0.02      | 6.53        | 0.05      | 6.27        | 0.03      | 6.20        | 0.06      | 6.17        | 0.10      |
| <b>Primary Constituents</b>     |                | <b>Mean</b> | <b>SD</b> |
| <b>Nicotine</b>                 | mg/collection  | 17.99       | 1.08      | 18.02       | 0.45      | 17.86       | 0.54      | 19.66       | 0.14      | 18.26       | 0.57      |
| <b>Glycerol</b>                 | mg/collection  | 452.86      | 25.80     | 483.47      | 11.68     | 465.17      | 13.98     | 520.53      | 5.74      | 488.44      | 13.95     |
| <b>Propylene Glycol</b>         | mg/collection  | 620.15      | 43.76     | 678.08      | 15.45     | 664.71      | 20.56     | 737.84      | 1.76      | 678.13      | 21.65     |
| <b>Water</b>                    | mg/collection  | 68.93       | 0.80      | 70.12       | 1.81      | 76.48       | 2.74      | 74.65       | 1.88      | 78.37       | 2.65      |
| <b>Menthol</b>                  | mg/collection  | 12.98       | 0.74      | 12.77       | 0.28      | 12.27       | 0.42      | 14.11       | 0.08      | 12.73       | 0.41      |
| <b>Diethylene Glycol</b>        | mg/collection  | BLOD        | NA        |
| <b>Ethylene Glycol</b>          | mg/collection  | BLOD        | NA        |
| <b>Carbonyls &amp; Glycidol</b> |                | <b>Mean</b> | <b>SD</b> |
| <b>Acetaldehyde</b>             | mcg/collection | 2.78        | 0.24      | 2.35        | 0.40      | 2.63        | 0.17      | 4.28        | 0.73      | 4.07        | 0.48      |
| <b>Acrolein</b>                 | mcg/collection | BLOQ        | NA        | BLOQ        | NA        | BLOQ        | NA        | 1.66        | 0.84      | 4.02        | 0.29      |
| <b>Diacetyl</b>                 | mcg/collection | BLOQ        | NA        |
| <b>Formaldehyde</b>             | mcg/collection | 13.96       | 2.12      | 14.26       | 1.43      | 12.91       | 1.10      | 20.48       | 7.12      | 14.14       | 0.84      |
| <b>Glycidol</b>                 | mcg/collection | 2.94        | 1.08      | 3.02        | 0.30      | 4.99        | 0.71      | 2.71        | 0.56      | 2.68        | 0.89      |



|                                        |                |             |           |             |           |             |           |             |           |             |           |
|----------------------------------------|----------------|-------------|-----------|-------------|-----------|-------------|-----------|-------------|-----------|-------------|-----------|
| <b>Acetyl Propionyl</b>                | mcg/collection | BLOD        | NA        |
| <b>Butyraldehyde</b>                   | mcg/collection | BLOD        | NA        |
| <b>Crotonaldehyde</b>                  | mcg/collection | BLOD        | NA        |
| <b>Furfural</b>                        | mcg/collection | BLOD        | NA        |
| <b>Nicotine Degradants &amp; TSNAs</b> |                | <b>Mean</b> | <b>SD</b> |
| <b>β-Nicotyrine</b>                    | mcg/collection | 2.27        | 0.09      | 2.73        | 0.19      | 3.47        | 0.15      | 4.10        | 0.41      | 3.70        | 0.27      |
| <b>Cotinine</b>                        | mcg/collection | BLOQ        | NA        | BLOQ        | NA        | BLOQ        | NA        | 1.20        | 0.36      | BLOQ        | NA        |
| <b>Myosmine</b>                        | mcg/collection | 1.87        | 0.10      | 2.27        | 0.17      | 2.58        | 0.12      | 3.10        | 0.23      | 2.66        | 0.18      |
| <b>Nicotine N Oxide</b>                | mcg/collection | 1.14        | 0.10      | BLOQ        | NA        | BLOQ        | NA        | 1.18        | 0.35      | 1.08        | 0.30      |
| <b>Nornicotine</b>                     | mcg/collection | 8.06        | 0.60      | 10.79       | 0.45      | 13.41       | 0.42      | 15.09       | 1.70      | 13.00       | 1.22      |
| <b>Anabasine</b>                       | mcg/collection | BLOD        | NA        |
| <b>Anatabine</b>                       | mcg/collection | BLOD        | NA        |
| <b>NNK</b>                             | mcg/collection | BLOQ        | NA        | NT          | NT        | NT          | NT        | NT          | NT        | NT          | NT        |
| <b>NNN</b>                             | mcg/collection | BLOD        | NA        | NT          | NT        | NT          | NT        | NT          | NT        | NT          | NT        |
| <b>Metals</b>                          |                | <b>Mean</b> | <b>SD</b> |
| <b>Arsenic</b>                         | ng/collection  | BLOD        | NA        |
| <b>Beryllium</b>                       | ng/collection  | BLOD        | NA        |
| <b>Cadmium</b>                         | ng/collection  | BLOD        | NA        |
| <b>Chromium</b>                        | ng/collection  | BLOQ        | NA        | BLOD        | NA        | BLOD        | NA        | BLOD        | NA        | BLOD        | NA        |
| <b>Cobalt</b>                          | ng/collection  | BLOD        | NA        |
| <b>Copper</b>                          | ng/collection  | BLOD        | NA        |
| <b>Gold</b>                            | ng/collection  | BLOD        | NA        | NT          | NT        | NT          | NT        | NT          | NT        | NT          | NT        |
| <b>Iron</b>                            | ng/collection  | 221.24      | 106.93    | BLOD        | NA        | BLOD        | NA        | BLOD        | NA        | BLOD        | NA        |
| <b>Lead</b>                            | ng/collection  | BLOD        | NA        |
| <b>Nickel</b>                          | ng/collection  | BLOD        | NA        |
| <b>Selenium</b>                        | ng/collection  | BLOQ        | NA        |
| <b>Silver</b>                          | ng/collection  | BLOD        | NA        | BLOQ        | NA        | BLOD        | NA        | BLOD        | NA        | BLOD        | NA        |
| <b>Tin</b>                             | ng/collection  | BLOQ        | NA        | BLOQ        | NA        | BLOQ        | NA        | BLOQ        | NA        | BLOD        | NA        |
| <b>Zinc</b>                            | ng/collection  | BLOD        | NA        |

| Organic Acids      |                | Mean   | SD   | Mean  | SD   | Mean | SD   | Mean  | SD   | Mean  | SD   |
|--------------------|----------------|--------|------|-------|------|------|------|-------|------|-------|------|
| Benzoic Acid       | mcg/collection | 13.20  | 1.19 | 12.29 | 1.59 | 9.56 | 3.13 | 12.03 | 1.41 | 11.49 | 1.49 |
| Propionic Acid     | mcg/collection | BLOD   | NA   | BLOD  | NA   | BLOD | NA   | BLOQ  | NA   | BLOQ  | NA   |
| VOCs               |                | Mean   | SD   | Mean  | SD   | Mean | SD   | Mean  | SD   | Mean  | SD   |
| 1,3-Butadiene      | mcg/collection | BLOD   | NA   | NT    | NT   | NT   | NT   | NT    | NT   | NT    | NT   |
| Acrylonitrile      | mcg/collection | BLOD   | NA   | NT    | NT   | NT   | NT   | NT    | NT   | NT    | NT   |
| Benzene            | mcg/collection | BLOD   | NA   | NT    | NT   | NT   | NT   | NT    | NT   | NT    | NT   |
| Isoprene           | mcg/collection | BLOD   | NA   | NT    | NT   | NT   | NT   | NT    | NT   | NT    | NT   |
| Propylene Oxide    | mcg/collection | BLOD   | NA   | NT    | NT   | NT   | NT   | NT    | NT   | NT    | NT   |
| Toluene            | mcg/collection | BLOQ   | NA   | NT    | NT   | NT   | NT   | NT    | NT   | NT    | NT   |
| Esters & Alcohols  |                | Mean   | SD   | Mean  | SD   | Mean | SD   | Mean  | SD   | Mean  | SD   |
| 1-Butanol          | mcg/collection | BLOD   | NA   | NT    | NT   | NT   | NT   | NT    | NT   | NT    | NT   |
| Benzyl Acetate     | mcg/collection | BLOD   | NA   | NT    | NT   | NT   | NT   | NT    | NT   | NT    | NT   |
| Ethyl Acetate      | mcg/collection | 118.72 | 3.37 | NT    | NT   | NT   | NT   | NT    | NT   | NT    | NT   |
| Ethyl Acetoacetate | mcg/collection | BLOD   | NA   | NT    | NT   | NT   | NT   | NT    | NT   | NT    | NT   |
| Isoamyl Acetate    | mcg/collection | BLOD   | NA   | NT    | NT   | NT   | NT   | NT    | NT   | NT    | NT   |
| Isobutyl Acetate   | mcg/collection | BLOD   | NA   | NT    | NT   | NT   | NT   | NT    | NT   | NT    | NT   |
| Methyl Acetate     | mcg/collection | BLOD   | NA   | NT    | NT   | NT   | NT   | NT    | NT   | NT    | NT   |

### 1.5 Polar Menthol 18 mg/mL Non-Intense Per Collection Analytical Stability Results

| Parameter/<br>Constituent | Units         | T0     |       | T3     |       | T6     |       | T9     |      | T12    |       |
|---------------------------|---------------|--------|-------|--------|-------|--------|-------|--------|------|--------|-------|
| # of puffs                | NA            | 100    |       | 132    |       | 115    |       | 122    |      | 106    |       |
| pH                        | NA            | 6.31   | 0.05  | 6.55   | 0.02  | 6.32   | 0.03  | 6.38   | 0.05 | 6.54   | 0.03  |
| Primary Constituents      |               | Mean   | SD    | Mean   | SD    | Mean   | SD    | Mean   | SD   | Mean   | SD    |
| Nicotine                  | mg/collection | 16.02  | 0.68  | 17.72  | 0.71  | 16.56  | 0.88  | 19.31  | 0.33 | 15.21  | 1.79  |
| Glycerol                  | mg/collection | 410.15 | 19.55 | 482.42 | 18.92 | 440.06 | 22.96 | 515.48 | 9.40 | 412.34 | 48.16 |

|                                        |                |             |           |             |           |             |           |             |           |             |           |
|----------------------------------------|----------------|-------------|-----------|-------------|-----------|-------------|-----------|-------------|-----------|-------------|-----------|
| <b>Propylene Glycol</b>                | mg/collection  | 566.40      | 28.43     | 679.43      | 25.88     | 744.50      | 69.18     | 729.91      | 13.55     | 566.07      | 54.97     |
| <b>Water</b>                           | mg/collection  | 58.69       | 2.00      | 84.49       | 2.49      | 73.28       | 2.64      | 74.13       | 1.71      | 74.80       | 6.20      |
| <b>Menthol</b>                         | mg/collection  | 12.36       | 0.57      | 13.54       | 0.68      | 12.70       | 0.78      | 15.22       | 0.30      | 11.51       | 1.41      |
| <b>Diethylene Glycol</b>               | mg/collection  | BLOD        | NA        |
| <b>Ethylene Glycol</b>                 | mg/collection  | BLOD        | NA        |
| <b>Carbonyls &amp; Glycidol</b>        |                | <b>Mean</b> | <b>SD</b> |
| <b>Acetaldehyde</b>                    | mcg/collection | BLOQ        | NA        | 3.11        | 0.43      | 2.58        | 0.44      | 3.66        | 0.39      | 4.41        | 0.52      |
| <b>Acrolein</b>                        | mcg/collection | BLOQ        | NA        | BLOQ        | NA        | BLOQ        | NA        | BLOQ        | NA        | 1.95        | 0.10      |
| <b>Diacetyl</b>                        | mcg/collection | BLOD        | NA        |
| <b>Formaldehyde</b>                    | mcg/collection | 5.09        | 0.70      | 11.93       | 1.69      | 8.99        | 1.55      | 12.36       | 1.14      | 13.34       | 0.97      |
| <b>Glycidol</b>                        | mcg/collection | 1.83        | 0.17      | 2.31        | 0.14      | 2.39        | 0.33      | 2.72        | 0.50      | 2.50        | 0.46      |
| <b>Acetyl Propionyl</b>                | mcg/collection | BLOD        | NA        |
| <b>Butyraldehyde</b>                   | mcg/collection | BLOD        | NA        |
| <b>Crotonaldehyde</b>                  | mcg/collection | BLOD        | NA        |
| <b>Furfural</b>                        | mcg/collection | BLOD        | NA        |
| <b>Nicotine Degradants &amp; TSNAs</b> |                | <b>Mean</b> | <b>SD</b> |
| <b>β-Nicotryne</b>                     | mcg/collection | BLOQ        | NA        | 2.50        | 0.41      | 2.39        | 0.35      | 5.31        | 0.62      | 4.69        | 0.90      |
| <b>Cotinine</b>                        | mcg/collection | BLOQ        | NA        | 1.55        | 0.25      | 1.43        | 0.17      | 1.30        | 0.12      | 2.39        | 0.35      |
| <b>Myosmine</b>                        | mcg/collection | 1.37        | 0.18      | 3.75        | 0.59      | 3.83        | 0.57      | 5.34        | 0.43      | 6.08        | 0.70      |
| <b>Nicotine N Oxide</b>                | mcg/collection | BLOQ        | NA        | 1.30        | 0.50      | 1.94        | 1.03      | 1.87        | 0.18      | 0.95        | 0.28      |
| <b>Nornicotine</b>                     | mcg/collection | 2.14        | 0.30      | 7.49        | 1.33      | 8.57        | 1.37      | 12.17       | 1.30      | 14.24       | 1.79      |
| <b>Anabasine</b>                       | mcg/collection | BLOD        | NA        |
| <b>Anatabine</b>                       | mcg/collection | BLOQ        | NA        |
| <b>NNK</b>                             | mcg/collection | BLOQ        | NA        | NT          | NT        | NT          | NT        | NT          | NT        | NT          | NT        |
| <b>NNN</b>                             | mcg/collection | BLOD        | NA        | NT          | NT        | NT          | NT        | NT          | NT        | NT          | NT        |
| <b>Metals</b>                          |                | <b>Mean</b> | <b>SD</b> |
| <b>Arsenic</b>                         | ng/collection  | BLOD        | NA        | BLOQ        | NA        | BLOQ        | NA        | BLOQ        | NA        | BLOD        | NA        |
| <b>Beryllium</b>                       | ng/collection  | BLOD        | NA        |
| <b>Cadmium</b>                         | ng/collection  | BLOD        | NA        |

|                              |                |             |           |             |           |             |           |             |           |             |           |
|------------------------------|----------------|-------------|-----------|-------------|-----------|-------------|-----------|-------------|-----------|-------------|-----------|
| <b>Chromium</b>              | ng/collection  | BLOQ        | NA        | BLOD        | NA        | BLOD        | NA        | BLOD        | NA        | BLOD        | NA        |
| <b>Cobalt</b>                | ng/collection  | BLOD        | NA        |
| <b>Copper</b>                | ng/collection  | BLOQ        | NA        | BLOD        | NA        | BLOQ        | NA        | BLOD        | NA        | BLOQ        | NA        |
| <b>Gold</b>                  | ng/collection  | BLOD        | NA        | NT          | NT        | NT          | NT        | NT          | NT        | NT          | NT        |
| <b>Iron</b>                  | ng/collection  | BLOQ        | NA        | BLOD        | NA        | BLOD        | NA        | BLOD        | NA        | BLOD        | NA        |
| <b>Lead</b>                  | ng/collection  | BLOD        | NA        |
| <b>Nickel</b>                | ng/collection  | BLOD        | NA        | BLOQ        | NA        | BLOQ        | NA        | BLOD        | NA        | BLOD        | NA        |
| <b>Selenium</b>              | ng/collection  | BLOQ        | NA        | BLOQ        | NA        | 20.06       | 12.11     | BLOQ        | NA        | BLOQ        | NA        |
| <b>Silver</b>                | ng/collection  | BLOD        | NA        |
| <b>Tin</b>                   | ng/collection  | BLOD        | NA        |
| <b>Zinc</b>                  | ng/collection  | BLOQ        | NA        | BLOD        | NA        | BLOD        | NA        | BLOD        | NA        | BLOD        | NA        |
| <b>Organic Acids</b>         |                | <b>Mean</b> | <b>SD</b> |
| <b>Benzoic Acid</b>          | mg/collection  | 8.14        | 0.53      | 10.19       | 0.61      | 9.62        | 0.27      | 10.06       | 0.57      | 8.30        | 1.01      |
| <b>Propionic Acid</b>        | mcg/collection | BLOD        | NA        | BLOD        | NA        | BLOD        | NA        | BLOQ        | NA        | BLOD        | NA        |
| <b>VOCs</b>                  |                | <b>Mean</b> | <b>SD</b> |
| <b>1,3-Butadiene</b>         | mcg/collection | BLOD        | NA        | NT          | NT        | NT          | NT        | NT          | NT        | NT          | NT        |
| <b>Acrylonitrile</b>         | mcg/collection | BLOD        | NA        | NT          | NT        | NT          | NT        | NT          | NT        | NT          | NT        |
| <b>Benzene</b>               | mcg/collection | BLOD        | NA        | NT          | NT        | NT          | NT        | NT          | NT        | NT          | NT        |
| <b>Isoprene</b>              | mcg/collection | BLOD        | NA        | NT          | NT        | NT          | NT        | NT          | NT        | NT          | NT        |
| <b>Propylene Oxide</b>       | mcg/collection | BLOD        | NA        | NT          | NT        | NT          | NT        | NT          | NT        | NT          | NT        |
| <b>Toluene</b>               | mcg/collection | BLOD        | NA        | NT          | NT        | NT          | NT        | NT          | NT        | NT          | NT        |
| <b>Esters &amp; Alcohols</b> |                | <b>Mean</b> | <b>SD</b> |
| <b>1-Butanol</b>             | mcg/collection | BLOD        | NA        | NT          | NT        | NT          | NT        | NT          | NT        | NT          | NT        |
| <b>Benzyl Acetate</b>        | mcg/collection | BLOD        | NA        | NT          | NT        | NT          | NT        | NT          | NT        | NT          | NT        |
| <b>Ethyl Acetate</b>         | mcg/collection | BLOQ        | NA        | NT          | NT        | NT          | NT        | NT          | NT        | NT          | NT        |
| <b>Ethyl Acetoacetate</b>    | mcg/collection | BLOD        | NA        | NT          | NT        | NT          | NT        | NT          | NT        | NT          | NT        |
| <b>Isoamyl Acetate</b>       | mcg/collection | BLOD        | NA        | NT          | NT        | NT          | NT        | NT          | NT        | NT          | NT        |
| <b>Isobutyl Acetate</b>      | mcg/collection | BLOD        | NA        | NT          | NT        | NT          | NT        | NT          | NT        | NT          | NT        |

|                       |                |      |    |    |    |    |    |    |    |    |    |
|-----------------------|----------------|------|----|----|----|----|----|----|----|----|----|
| <b>Methyl Acetate</b> | mcg/collection | BLOD | NA | NT |
|-----------------------|----------------|------|----|----|----|----|----|----|----|----|----|

## 1.6 Polar Menthol 18 mg/mL Intense Per Collection Analytical Stability Results

| Parameter/<br>Constituent              | Units          | T0          |           | T3          |           | T6          |           | T9          |           | T12         |           |
|----------------------------------------|----------------|-------------|-----------|-------------|-----------|-------------|-----------|-------------|-----------|-------------|-----------|
| # of puffs                             | NA             | 81          |           | 81          |           | 81          |           | 81          |           | 80          |           |
| pH                                     | NA             | 6.24        | 0.04      | 6.57        | 0.04      | 6.36        | 0.03      | 6.22        | 0.06      | 6.42        | 0.05      |
| <b>Primary Constituents</b>            |                | <b>Mean</b> | <b>SD</b> |
| Nicotine                               | mg/collection  | 17.82       | 1.18      | 17.71       | 1.65      | 17.56       | 0.59      | 19.55       | 0.25      | 18.02       | 0.32      |
| Glycerol                               | mg/collection  | 455.73      | 28.72     | 483.23      | 43.54     | 467.18      | 12.42     | 524.99      | 6.87      | 492.91      | 7.25      |
| Propylene Glycol                       | mg/collection  | 629.21      | 38.52     | 715.07      | 103.73    | 660.56      | 21.54     | 740.35      | 10.85     | 676.06      | 12.86     |
| Water                                  | mg/collection  | 72.38       | 1.80      | 70.84       | 7.44      | 71.58       | 4.22      | 70.62       | 1.60      | 75.86       | 3.85      |
| Menthol                                | mg/collection  | 13.67       | 0.93      | 13.42       | 1.22      | 12.77       | 0.45      | 15.05       | 0.23      | 13.29       | 0.17      |
| Diethylene Glycol                      | mg/collection  | BLOD        | NA        |
| Ethylene Glycol                        | mg/collection  | BLOD        | NA        |
| <b>Carbonyls &amp; Glycidol</b>        |                | <b>Mean</b> | <b>SD</b> |
| Acetaldehyde                           | mcg/collection | 1.99        | 0.11      | 2.68        | 0.33      | 3.20        | 0.47      | 4.65        | 0.33      | 5.66        | 1.12      |
| Acrolein                               | mcg/collection | 1.64        | 0.13      | 1.61        | 0.52      | BLOQ        | NA        | 1.44        | 0.42      | 5.03        | 2.20      |
| Diacetyl                               | mcg/collection | BLOD        | NA        | BLOQ        | NA        | BLOQ        | NA        | BLOD        | NA        | BLOQ        | NA        |
| Formaldehyde                           | mcg/collection | 11.88       | 0.85      | 13.48       | 0.73      | 13.29       | 1.52      | 16.90       | 2.08      | 15.60       | 3.38      |
| Glycidol                               | mcg/collection | 3.67        | 0.38      | 3.11        | 0.38      | 3.36        | 0.83      | 2.28        | 0.53      | 3.57        | 0.61      |
| Acetyl Propionyl                       | mcg/collection | BLOD        | NA        |
| Butyraldehyde                          | mcg/collection | BLOD        | NA        |
| Crotonaldehyde                         | mcg/collection | BLOD        | NA        |
| Furfural                               | mcg/collection | BLOD        | NA        |
| <b>Nicotine Degradants &amp; TSNAs</b> |                | <b>Mean</b> | <b>SD</b> |
| β-Nicotyrine                           | mcg/collection | BLOQ        | NA        | 2.47        | 0.29      | 3.14        | 1.11      | 6.61        | 0.63      | 4.60        | 1.09      |
| Cotinine                               | mcg/collection | BLOQ        | NA        | 1.05        | 0.28      | 1.36        | 0.11      | 1.97        | 0.16      | 2.08        | 0.36      |

|                         |                |             |           |             |           |             |           |             |           |             |           |
|-------------------------|----------------|-------------|-----------|-------------|-----------|-------------|-----------|-------------|-----------|-------------|-----------|
| <b>Myosmine</b>         | mcg/collection | 2.18        | 0.17      | 3.81        | 0.43      | 4.94        | 0.46      | 5.71        | 0.41      | 5.91        | 1.24      |
| <b>Nicotine N Oxide</b> | mcg/collection | BLOQ        | NA        |
| <b>Nornicotine</b>      | mcg/collection | 2.63        | 0.20      | 6.72        | 0.97      | 8.40        | 2.72      | 12.64       | 1.09      | 12.75       | 2.56      |
| <b>Anabasine</b>        | mcg/collection | BLOD        | NA        | BLOD        | NA        | BLOD        | NA        | BLOQ        | NA        | BLOD        | NA        |
| <b>Anatabine</b>        | mcg/collection | BLOQ        | NA        |
| <b>NNK</b>              | mcg/collection | BLOQ        | NA        | NT          | NT        | NT          | NT        | NT          | NT        | NT          | NT        |
| <b>NNN</b>              | mcg/collection | BLOD        | NA        | NT          | NT        | NT          | NT        | NT          | NT        | NT          | NT        |
| <b>Metals</b>           |                | <b>Mean</b> | <b>SD</b> |
| <b>Arsenic</b>          | ng/collection  | BLOD        | NA        | BLOD        | NA        | BLOQ        | NA        | BLOD        | NA        | BLOD        | NA        |
| <b>Beryllium</b>        | ng/collection  | BLOD        | NA        |
| <b>Cadmium</b>          | ng/collection  | BLOD        | NA        |
| <b>Chromium</b>         | ng/collection  | BLOQ        | NA        | BLOD        | NA        | BLOD        | NA        | BLOD        | NA        | BLOQ        | NA        |
| <b>Cobalt</b>           | ng/collection  | BLOD        | NA        |
| <b>Copper</b>           | ng/collection  | BLOD        | NA        |
| <b>Gold</b>             | ng/collection  | BLOD        | NA        | NT          | NT        | NT          | NT        | NT          | NT        | NT          | NT        |
| <b>Iron</b>             | ng/collection  | BLOQ        | NA        | BLOD        | NA        | BLOD        | NA        | BLOD        | NA        | BLOD        | NA        |
| <b>Lead</b>             | ng/collection  | BLOD        | NA        |
| <b>Nickel</b>           | ng/collection  | BLOD        | NA        | BLOQ        | NA        | BLOD        | NA        | BLOD        | NA        | BLOD        | NA        |
| <b>Selenium</b>         | ng/collection  | BLOQ        | NA        | BLOQ        | NA        | 24.53       | 12.14     | BLOQ        | NA        | BLOQ        | NA        |
| <b>Silver</b>           | ng/collection  | BLOD        | NA        | BLOQ        | NA        | BLOD        | NA        | BLOD        | NA        | BLOD        | NA        |
| <b>Tin</b>              | ng/collection  | BLOD        | NA        | BLOQ        | NA        | BLOQ        | NA        | BLOQ        | NA        | BLOD        | NA        |
| <b>Zinc</b>             | ng/collection  | BLOD        | NA        | BLOD        | NA        | BLOQ        | NA        | BLOD        | NA        | BLOD        | NA        |
| <b>Organic Acids</b>    |                | <b>Mean</b> | <b>SD</b> |
| <b>Benzoic Acid</b>     | mg/collection  | 12.87       | 3.98      | 12.65       | 0.95      | 11.16       | 1.17      | 12.41       | 0.74      | 10.82       | 1.07      |
| <b>Propionic Acid</b>   | mcg/collection | BLOD        | NA        | BLOQ        | NA        | BLOD        | NA        | BLOQ        | NA        | BLOD        | NA        |
| <b>VOCs</b>             |                | <b>Mean</b> | <b>SD</b> |
| <b>1,3-Butadiene</b>    | mcg/collection | BLOD        | NA        | NT          | NT        | NT          | NT        | NT          | NT        | NT          | NT        |
| <b>Acrylonitrile</b>    | mcg/collection | BLOD        | NA        | NT          | NT        | NT          | NT        | NT          | NT        | NT          | NT        |

|                              |                |             |           |             |           |             |           |             |           |             |           |
|------------------------------|----------------|-------------|-----------|-------------|-----------|-------------|-----------|-------------|-----------|-------------|-----------|
| <b>Benzene</b>               | mcg/collection | BLOD        | NA        | NT          | NT        | NT          | NT        | NT          | NT        | NT          | NT        |
| <b>Isoprene</b>              | mcg/collection | BLOD        | NA        | NT          | NT        | NT          | NT        | NT          | NT        | NT          | NT        |
| <b>Propylene Oxide</b>       | mcg/collection | BLOD        | NA        | NT          | NT        | NT          | NT        | NT          | NT        | NT          | NT        |
| <b>Toluene</b>               | mcg/collection | BLOD        | NA        | NT          | NT        | NT          | NT        | NT          | NT        | NT          | NT        |
| <b>Esters &amp; Alcohols</b> |                | <b>Mean</b> | <b>SD</b> |
| <b>1-Butanol</b>             | mcg/collection | BLOD        | NA        | NT          | NT        | NT          | NT        | NT          | NT        | NT          | NT        |
| <b>Benzyl Acetate</b>        | mcg/collection | BLOD        | NA        | NT          | NT        | NT          | NT        | NT          | NT        | NT          | NT        |
| <b>Ethyl Acetate</b>         | mcg/collection | BLOQ        | NA        | NT          | NT        | NT          | NT        | NT          | NT        | NT          | NT        |
| <b>Ethyl Acetoacetate</b>    | mcg/collection | BLOD        | NA        | NT          | NT        | NT          | NT        | NT          | NT        | NT          | NT        |
| <b>Isoamyl Acetate</b>       | mcg/collection | BLOD        | NA        | NT          | NT        | NT          | NT        | NT          | NT        | NT          | NT        |
| <b>Isobutyl Acetate</b>      | mcg/collection | BLOD        | NA        | NT          | NT        | NT          | NT        | NT          | NT        | NT          | NT        |
| <b>Methyl Acetate</b>        | mcg/collection | BLOD        | NA        | NT          | NT        | NT          | NT        | NT          | NT        | NT          | NT        |

### 1.7 Autumn Tobacco 18 mg/mL Non-Intense Per Collection Analytical Stability Results

| Parameter/<br>Constituent       | Units          | T0          |           | T3          |           | T6          |           | T9          |           | T12         |           |
|---------------------------------|----------------|-------------|-----------|-------------|-----------|-------------|-----------|-------------|-----------|-------------|-----------|
| <b># of puffs</b>               | NA             | 128         |           | 128         |           | 119         |           | 122         |           | 124         |           |
| <b>pH</b>                       | NA             | 6.36        | 0.06      | 6.16        | 0.07      | 6.37        | 0.05      | 6.41        | 0.13      | 6.14        | 0.03      |
| <b>Primary Constituents</b>     |                | <b>Mean</b> | <b>SD</b> |
| <b>Nicotine</b>                 | mg/collection  | 16.46       | 1.65      | 16.54       | 0.81      | 16.69       | 1.20      | 17.66       | 0.57      | 17.99       | 0.29      |
| <b>Glycerol</b>                 | mg/collection  | 427.06      | 41.69     | 427.12      | 22.52     | 414.24      | 29.35     | 430.50      | 12.54     | 440.29      | 5.03      |
| <b>Propylene Glycol</b>         | mg/collection  | 559.89      | 57.30     | 548.60      | 28.83     | 527.77      | 42.27     | 560.23      | 15.11     | 596.62      | 10.41     |
| <b>Water</b>                    | mg/collection  | 53.15       | 4.83      | 74.07       | 1.95      | 69.81       | 4.32      | 78.37       | 2.07      | 112.33      | 15.49     |
| <b>Menthol</b>                  | mg/collection  | BLOD        | NA        |
| <b>Diethylene Glycol</b>        | mg/collection  | BLOD        | NA        |
| <b>Ethylene Glycol</b>          | mg/collection  | BLOD        | NA        |
| <b>Carbonyls &amp; Glycidol</b> |                | <b>Mean</b> | <b>SD</b> |
| <b>Acetaldehyde</b>             | mcg/collection | 1.69        | 0.21      | 2.27        | 0.22      | 2.68        | 0.26      | 2.75        | 0.16      | 2.58        | 0.48      |

|                                        |                |             |           |             |           |             |           |             |           |             |           |
|----------------------------------------|----------------|-------------|-----------|-------------|-----------|-------------|-----------|-------------|-----------|-------------|-----------|
| <b>Acrolein</b>                        | mcg/collection | 1.16        | 0.37      | BLOQ        | NA        | BLOQ        | NA        | BLOQ        | NA        | BLOQ        | NA        |
| <b>Diacetyl</b>                        | mcg/collection | BLOD        | NA        | BLOQ        | NA        | BLOD        | NA        | BLOQ        | NA        | BLOQ        | NA        |
| <b>Formaldehyde</b>                    | mcg/collection | 9.16        | 0.33      | 7.28        | 0.20      | 7.81        | 0.43      | 8.77        | 0.59      | 9.69        | 1.20      |
| <b>Glycidol</b>                        | mcg/collection | 1.89        | 0.61      | 2.16        | 0.47      | 2.06        | 0.34      | 1.51        | 0.28      | 2.90        | 0.51      |
| <b>Acetyl Propionyl</b>                | mcg/collection | BLOD        | NA        |
| <b>Butyraldehyde</b>                   | mcg/collection | BLOD        | NA        | BLOD        | NA        | BLOD        | NA        | BLOQ        | NA        | BLOD        | NA        |
| <b>Crotonaldehyde</b>                  | mcg/collection | BLOD        | NA        |
| <b>Furfural</b>                        | mcg/collection | BLOD        | NA        |
| <b>Nicotine Degradants &amp; TSNAs</b> |                | <b>Mean</b> | <b>SD</b> |
| <b>β-Nicotyrine</b>                    | mcg/collection | 0.93        | 0.22      | BLOQ        | NA        | 1.96        | 0.21      | 1.21        | 0.34      | 1.83        | 0.27      |
| <b>Cotinine</b>                        | mcg/collection | 1.36        | 0.21      | BLOQ        | NA        | 1.25        | 0.17      | 3.33        | 1.88      | 1.76        | 0.21      |
| <b>Myosmine</b>                        | mcg/collection | 1.91        | 0.11      | 2.52        | 0.14      | 2.87        | 0.34      | 3.21        | 0.35      | 3.39        | 0.24      |
| <b>Nicotine N Oxide</b>                | mcg/collection | 1.40        | 0.35      | BLOQ        | NA        | 1.40        | 0.17      | 4.43        | 2.98      | 1.34        | 0.69      |
| <b>Nornicotine</b>                     | mcg/collection | 3.52        | 0.22      | 4.41        | 0.67      | 7.84        | 0.81      | 10.43       | 2.97      | 9.95        | 0.63      |
| <b>Anabasine</b>                       | mcg/collection | BLOD        | NA        |
| <b>Anatabine</b>                       | mcg/collection | BLOD        | NA        |
| <b>NNK</b>                             | mcg/collection | BLOQ        | NA        | BLOQ        | NA        | NT          | NT        | NT          | NT        | NT          | NT        |
| <b>NNN</b>                             | mcg/collection | BLOD        | NA        | BLOD        | NA        | NT          | NT        | NT          | NT        | NT          | NT        |
| <b>Metals</b>                          |                | <b>Mean</b> | <b>SD</b> |
| <b>Arsenic</b>                         | ng/collection  | BLOQ        | NA        | BLOD        | NA        | BLOQ        | NA        | BLOD        | NA        | BLOD        | NA        |
| <b>Beryllium</b>                       | ng/collection  | BLOD        | NA        |
| <b>Cadmium</b>                         | ng/collection  | BLOD        | NA        |
| <b>Chromium</b>                        | ng/collection  | BLOD        | NA        | BLOD        | NA        | BLOQ        | NA        | BLOD        | NA        | BLOD        | NA        |
| <b>Cobalt</b>                          | ng/collection  | BLOD        | NA        |
| <b>Copper</b>                          | ng/collection  | BLOD        | NA        |
| <b>Gold</b>                            | ng/collection  | BLOD        | NA        |
| <b>Iron</b>                            | ng/collection  | BLOD        | NA        |
| <b>Lead</b>                            | ng/collection  | BLOD        | NA        |



|                              |                |             |           |             |           |             |           |             |           |             |           |
|------------------------------|----------------|-------------|-----------|-------------|-----------|-------------|-----------|-------------|-----------|-------------|-----------|
| <b>Nickel</b>                | ng/collection  | BLOD        | NA        |
| <b>Selenium</b>              | ng/collection  | BLOQ        | NA        | BLOQ        | NA        | BLOQ        | NA        | BLOQ        | NA        | BLOD        | NA        |
| <b>Silver</b>                | ng/collection  | BLOD        | NA        |
| <b>Tin</b>                   | ng/collection  | BLOD        | NA        | BLOD        | NA        | BLOQ        | NA        | BLOQ        | NA        | BLOD        | NA        |
| <b>Zinc</b>                  | ng/collection  | BLOD        | NA        |
| <b>Organic Acids</b>         |                | <b>Mean</b> | <b>SD</b> |
| <b>Benzoic Acid</b>          | mg/collection  | 9.31        | 1.66      | 9.38        | 1.12      | 10.49       | 0.63      | 12.50       | 0.38      | 9.03        | 1.07      |
| <b>Propionic Acid</b>        | mcg/collection | BLOD        | NA        |
| <b>VOCs</b>                  |                | <b>Mean</b> | <b>SD</b> |
| <b>1,3-butadiene</b>         | mcg/collection | BLOD        | NA        | BLOD        | NA        | NT          | NT        | NT          | NT        | NT          | NT        |
| <b>Acrylonitrile</b>         | mcg/collection | BLOD        | NA        | BLOD        | NA        | NT          | NT        | NT          | NT        | NT          | NT        |
| <b>Benzene</b>               | mcg/collection | BLOQ        | NA        | BLOQ        | NA        | NT          | NT        | NT          | NT        | NT          | NT        |
| <b>Isoprene</b>              | mcg/collection | BLOD        | NA        | BLOD        | NA        | NT          | NT        | NT          | NT        | NT          | NT        |
| <b>Propylene Oxide</b>       | mcg/collection | BLOD        | NA        | BLOD        | NA        | NT          | NT        | NT          | NT        | NT          | NT        |
| <b>Toluene</b>               | mcg/collection | BLOQ        | NA        | BLOD        | NA        | NT          | NT        | NT          | NT        | NT          | NT        |
| <b>Esters &amp; Alcohols</b> |                | <b>Mean</b> | <b>SD</b> |
| <b>1-Butanol</b>             | mcg/collection | BLOD        | NA        | BLOQ        | NA        | NT          | NT        | NT          | NT        | NT          | NT        |
| <b>Benzyl Acetate</b>        | mcg/collection | BLOD        | NA        | BLOD        | NA        | NT          | NT        | NT          | NT        | NT          | NT        |
| <b>Ethyl Acetate</b>         | mcg/collection | BLOD        | NA        | BLOD        | NA        | NT          | NT        | NT          | NT        | NT          | NT        |
| <b>Ethyl Acetoacetate</b>    | mcg/collection | BLOD        | NA        | BLOD        | NA        | NT          | NT        | NT          | NT        | NT          | NT        |
| <b>Isoamyl Acetate</b>       | mcg/collection | BLOD        | NA        | BLOD        | NA        | NT          | NT        | NT          | NT        | NT          | NT        |
| <b>Isobutyl Acetate</b>      | mcg/collection | BLOD        | NA        | BLOD        | NA        | NT          | NT        | NT          | NT        | NT          | NT        |
| <b>Methyl Acetate</b>        | mcg/collection | BLOD        | NA        | BLOQ        | NA        | NT          | NT        | NT          | NT        | NT          | NT        |

## 1.8 Autumn Tobacco 18 mg/mL Intense Per Collection Analytical Stability Results

| Parameter/<br>Constituent | Units | T0 | T3 | T6 | T9 | T12 |
|---------------------------|-------|----|----|----|----|-----|
| # of puffs                | NA    | 80 | 76 | 68 | 72 | 68  |

| pH                          | NA             | 6.43   | 0.06  | 6.27   | 0.03  | 6.35   | 0.06  | 6.06   | 0.05  | 6.12   | 0.03  |
|-----------------------------|----------------|--------|-------|--------|-------|--------|-------|--------|-------|--------|-------|
| Primary Constituents        |                | Mean   | SD    |
| Nicotine                    | mg/collection  | 15.58  | 1.83  | 14.86  | 1.36  | 15.76  | 0.94  | 15.22  | 1.87  | 15.75  | 1.62  |
| Glycerol                    | mg/collection  | 408.86 | 45.77 | 385.12 | 33.34 | 396.62 | 23.63 | 379.80 | 45.48 | 389.05 | 40.50 |
| Propylene Glycol            | mg/collection  | 530.42 | 64.90 | 502.73 | 47.25 | 499.31 | 32.39 | 487.07 | 56.68 | 523.30 | 53.66 |
| Water                       | mg/collection  | 48.86  | 3.47  | 68.44  | 2.46  | 63.13  | 2.16  | 69.53  | 4.55  | 85.29  | 16.13 |
| Menthol                     | mg/collection  | BLOD   | NA    | BLOD   | NA    | BLOQ   | NA    | BLOD   | NA    | BLOD   | NA    |
| Diethylene Glycol           | mg/collection  | BLOD   | NA    |
| Ethylene Glycol             | mg/collection  | BLOD   | NA    |
| Carbonyls & Glycidol        |                | Mean   | SD    |
| Acetaldehyde                | mcg/collection | 1.97   | 0.13  | 2.52   | 0.24  | 2.53   | 0.20  | 2.92   | 0.37  | 2.19   | 0.11  |
| Acrolein                    | mcg/collection | 1.98   | 0.46  | BLOQ   | NA    | BLOQ   | NA    | BLOQ   | NA    | BLOQ   | NA    |
| Diacetyl                    | mcg/collection | BLOQ   | NA    | BLOQ   | NA    | BLOQ   | NA    | BLOQ   | NA    | BLOD   | NA    |
| Formaldehyde                | mcg/collection | 10.41  | 2.40  | 10.38  | 0.47  | 8.23   | 0.53  | 10.51  | 0.67  | 10.29  | 1.12  |
| Glycidol                    | mcg/collection | 3.87   | 0.82  | 3.26   | 0.47  | 2.80   | 0.53  | 2.19   | 0.36  | 4.25   | 0.45  |
| Acetyl Propionyl            | mcg/collection | BLOD   | NA    | BLOD   | NA    | BLOD   | NA    | BLOQ   | NA    | BLOD   | NA    |
| Butyraldehyde               | mcg/collection | BLOD   | NA    |
| Crotonaldehyde              | mcg/collection | BLOD   | NA    |
| Furfural                    | mcg/collection | BLOD   | NA    |
| Nicotine Degradants & TSNAs |                | Mean   | SD    |
| β-Nicotyrine                | mcg/collection | BLOQ   | NA    | BLOQ   | NA    | 1.85   | 0.20  | 1.30   | 0.36  | 1.69   | 0.35  |
| Cotinine                    | mcg/collection | BLOQ   | NA    | BLOQ   | NA    | BLOQ   | NA    | 4.18   | 3.81  | 1.69   | 0.26  |
| Myosmine                    | mcg/collection | 1.70   | 0.61  | 2.74   | 0.24  | 2.70   | 0.21  | 3.23   | 0.35  | 3.18   | 0.49  |
| Nicotine N Oxide            | mcg/collection | BLOQ   | NA    | BLOQ   | NA    | BLOQ   | NA    | 4.44   | 3.65  | BLOQ   | NA    |
| Nornicotine                 | mcg/collection | 3.20   | 0.78  | 5.52   | 0.75  | 6.77   | 0.89  | 11.01  | 3.21  | 6.72   | 3.15  |
| Anabasine                   | mcg/collection | BLOD   | NA    |
| Anatabine                   | mcg/collection | BLOD   | NA    |
| NNK                         | mcg/collection | BLOQ   | NA    | BLOQ   | NA    | NT     | NT    | NT     | NT    | NT     | NT    |

|                              |                |             |           |             |           |             |           |             |           |             |           |
|------------------------------|----------------|-------------|-----------|-------------|-----------|-------------|-----------|-------------|-----------|-------------|-----------|
| <b>NNN</b>                   | mcg/collection | BLOD        | NA        | BLOQ        | NA        | NT          | NT        | NT          | NT        | NT          | NT        |
| <b>Metals</b>                |                | <b>Mean</b> | <b>SD</b> |
| <b>Arsenic</b>               | ng/collection  | BLOD        | NA        | BLOD        | NA        | BLOQ        | NA        | BLOD        | NA        | BLOD        | NA        |
| <b>Beryllium</b>             | ng/collection  | BLOD        | NA        |
| <b>Cadmium</b>               | ng/collection  | BLOD        | NA        |
| <b>Chromium</b>              | ng/collection  | BLOD        | NA        | BLOD        | NA        | BLOQ        | NA        | BLOD        | NA        | BLOD        | NA        |
| <b>Cobalt</b>                | ng/collection  | BLOD        | NA        |
| <b>Copper</b>                | ng/collection  | BLOD        | NA        |
| <b>Gold</b>                  | ng/collection  | BLOD        | NA        |
| <b>Iron</b>                  | ng/collection  | BLOD        | NA        |
| <b>Lead</b>                  | ng/collection  | BLOD        | NA        |
| <b>Nickel</b>                | ng/collection  | BLOD        | NA        |
| <b>Selenium</b>              | ng/collection  | BLOQ        | NA        |
| <b>Silver</b>                | ng/collection  | BLOD        | NA        |
| <b>Tin</b>                   | ng/collection  | BLOD        | NA        | BLOQ        | NA        | BLOQ        | NA        | BLOQ        | NA        | BLOD        | NA        |
| <b>Zinc</b>                  | ng/collection  | BLOD        | NA        |
| <b>Organic Acids</b>         |                | <b>Mean</b> | <b>SD</b> |
| <b>Benzoic Acid</b>          | mg/collection  | 11.63       | 1.17      | 11.39       | 0.82      | 9.19        | 1.25      | 12.69       | 1.02      | 9.81        | 0.87      |
| <b>Propionic Acid</b>        | mcg/collection | BLOD        | NA        |
| <b>VOCs</b>                  |                | <b>Mean</b> | <b>SD</b> |
| <b>1,3-butadiene</b>         | mcg/collection | BLOD        | NA        | BLOD        | NA        | NT          | NT        | NT          | NT        | NT          | NT        |
| <b>Acrylonitrile</b>         | mcg/collection | BLOD        | NA        | BLOD        | NA        | NT          | NT        | NT          | NT        | NT          | NT        |
| <b>Benzene</b>               | mcg/collection | BLOQ        | NA        | BLOQ        | NA        | NT          | NT        | NT          | NT        | NT          | NT        |
| <b>Isoprene</b>              | mcg/collection | BLOD        | NA        | BLOD        | NA        | NT          | NT        | NT          | NT        | NT          | NT        |
| <b>Propylene Oxide</b>       | mcg/collection | BLOD        | NA        | BLOD        | NA        | NT          | NT        | NT          | NT        | NT          | NT        |
| <b>Toluene</b>               | mcg/collection | BLOQ        | NA        | BLOQ        | NA        | NT          | NT        | NT          | NT        | NT          | NT        |
| <b>Esters &amp; Alcohols</b> |                | <b>Mean</b> | <b>SD</b> |
| <b>1-Butanol</b>             | mcg/collection | BLOQ        | NA        | BLOQ        | NA        | NT          | NT        | NT          | NT        | NT          | NT        |
| <b>Benzyl Acetate</b>        | mcg/collection | BLOD        | NA        | BLOD        | NA        | NT          | NT        | NT          | NT        | NT          | NT        |

|                           |                |      |    |      |    |    |    |    |    |    |    |
|---------------------------|----------------|------|----|------|----|----|----|----|----|----|----|
| <b>Ethyl Acetate</b>      | mcg/collection | BLOD | NA | BLOD | NA | NT | NT | NT | NT | NT | NT |
| <b>Ethyl Acetoacetate</b> | mcg/collection | BLOD | NA | BLOD | NA | NT | NT | NT | NT | NT | NT |
| <b>Isoamyl Acetate</b>    | mcg/collection | BLOD | NA | BLOD | NA | NT | NT | NT | NT | NT | NT |
| <b>Isobutyl Acetate</b>   | mcg/collection | BLOD | NA | BLOD | NA | NT | NT | NT | NT | NT | NT |
| <b>Methyl Acetate</b>     | mcg/collection | BLOD | NA | BLOD | NA | NT | NT | NT | NT | NT | NT |

### 1.9 Ruby Menthol 18 mg/mL Non-Intense Per Collection Analytical Stability Results

| Parameter/<br>Constituent       | Units          | T0          |           | T3          |           | T6          |           | T9          |           | T12         |           |
|---------------------------------|----------------|-------------|-----------|-------------|-----------|-------------|-----------|-------------|-----------|-------------|-----------|
| # of puffs                      | NA             | 130         |           | 127         |           | 135         |           | 124         |           | 124         |           |
| pH                              | NA             | 5.90        | 0.08      | 5.60        | 0.03      | 5.90        | 0.04      | 5.70        | 0.05      | 5.62        | 0.06      |
| <b>Primary Constituents</b>     |                | <b>Mean</b> | <b>SD</b> |
| Nicotine                        | mg/collection  | 16.55       | 0.62      | 15.88       | 0.55      | 17.95       | 1.17      | 17.94       | 0.95      | 16.39       | 0.70      |
| Glycerol                        | mg/collection  | 428.33      | 15.40     | 412.38      | 16.18     | 436.34      | 19.79     | 436.41      | 14.14     | 402.59      | 16.93     |
| Propylene Glycol                | mg/collection  | 578.80      | 22.62     | 552.64      | 19.36     | 587.70      | 40.37     | 582.89      | 30.95     | 558.46      | 22.81     |
| Water                           | mg/collection  | 36.69       | 2.03      | 66.21       | 2.19      | 68.56       | 6.73      | 68.45       | 2.24      | 134.36      | 6.11      |
| Menthol                         | mg/collection  | 9.49        | 0.38      | 8.75        | 0.32      | 9.57        | 0.64      | 9.63        | 0.53      | 8.58        | 0.34      |
| Diethylene Glycol               | mg/collection  | BLOD        | NA        |
| Ethylene Glycol                 | mg/collection  | BLOD        | NA        |
| <b>Carbonyls &amp; Glycidol</b> |                | <b>Mean</b> | <b>SD</b> |
| Acetaldehyde                    | mcg/collection | 3.49        | 0.33      | 3.52        | 0.66      | 5.27        | 0.95      | 5.09        | 0.61      | 4.67        | 0.97      |
| Acrolein                        | mcg/collection | BLOQ        | NA        |
| Diacetyl                        | mcg/collection | BLOQ        | NA        |
| Formaldehyde                    | mcg/collection | 9.73        | 0.66      | 8.48        | 1.10      | 11.48       | 1.52      | 12.42       | 1.32      | 13.40       | 1.63      |
| Glycidol                        | mcg/collection | 2.05        | 0.56      | 2.55        | 0.20      | 2.53        | 0.23      | 2.38        | 0.16      | 3.02        | 0.29      |
| Acetyl Propionyl                | mcg/collection | BLOD        | NA        |
| Butyraldehyde                   | mcg/collection | BLOD        | NA        |

|                                        |                |             |           |             |           |             |           |             |           |             |           |
|----------------------------------------|----------------|-------------|-----------|-------------|-----------|-------------|-----------|-------------|-----------|-------------|-----------|
| <b>Crotonaldehyde</b>                  | mcg/collection | BLOD        | NA        |
| <b>Furfural</b>                        | mcg/collection | BLOD        | NA        |
| <b>Nicotine Degradants &amp; TSNAs</b> |                | <b>Mean</b> | <b>SD</b> |
| <b>β-Nicotyrine</b>                    | mcg/collection | 1.50        | 0.12      | 1.49        | 0.77      | 3.72        | 1.63      | 3.00        | 1.20      | 2.65        | 1.54      |
| <b>Cotinine</b>                        | mcg/collection | 1.04        | 0.14      | BLOQ        | NA        | 2.21        | 0.44      | 4.35        | 1.02      | 2.56        | 0.55      |
| <b>Myosmine</b>                        | mcg/collection | 2.01        | 0.15      | 3.12        | 0.61      | 4.67        | 0.77      | 5.21        | 0.70      | 4.94        | 0.81      |
| <b>Nicotine N Oxide</b>                | mcg/collection | 0.98        | 0.41      | 1.07        | 1.40      | 0.91        | 0.33      | 4.60        | 2.41      | BLOQ        | NA        |
| <b>Nornicotine</b>                     | mcg/collection | 2.99        | 0.36      | 6.00        | 2.80      | 8.00        | 3.59      | 11.99       | 5.34      | 10.48       | 6.22      |
| <b>Anabasine</b>                       | mcg/collection | BLOD        | NA        |
| <b>Anatabine</b>                       | mcg/collection | BLOD        | NA        |
| <b>NNK</b>                             | mcg/collection | BLOQ        | NA        | BLOQ        | NA        | NT          | NT        | NT          | NT        | NT          | NT        |
| <b>NNN</b>                             | mcg/collection | 0.01        | 0.0005    | BLOQ        | NA        | NT          | NT        | NT          | NT        | NT          | NT        |
| <b>Metals</b>                          |                | <b>Mean</b> | <b>SD</b> |
| <b>Arsenic</b>                         | ng/collection  | BLOD        | NA        |
| <b>Beryllium</b>                       | ng/collection  | BLOD        | NA        |
| <b>Cadmium</b>                         | ng/collection  | BLOD        | NA        |
| <b>Chromium</b>                        | ng/collection  | BLOD        | NA        |
| <b>Cobalt</b>                          | ng/collection  | BLOD        | NA        |
| <b>Copper</b>                          | ng/collection  | BLOD        | NA        |
| <b>Gold</b>                            | ng/collection  | BLOD        | NA        |
| <b>Iron</b>                            | ng/collection  | BLOD        | NA        |
| <b>Lead</b>                            | ng/collection  | BLOD        | NA        |
| <b>Nickel</b>                          | ng/collection  | BLOD        | NA        |
| <b>Selenium</b>                        | ng/collection  | BLOQ        | NA        |
| <b>Silver</b>                          | ng/collection  | BLOD        | NA        | BLOD        | NA        | BLOQ        | NA        | BLOD        | NA        | BLOD        | NA        |
| <b>Tin</b>                             | ng/collection  | BLOD        | NA        |
| <b>Zinc</b>                            | ng/collection  | BLOD        | NA        |
| <b>Organic Acids</b>                   |                | <b>Mean</b> | <b>SD</b> |
| <b>Benzoic Acid</b>                    | mg/collection  | 8.33        | 0.89      | 11.42       | 0.78      | 11.53       | 0.81      | 11.98       | 0.92      | 9.37        | 0.69      |

|                              |                |             |           |             |           |             |           |             |           |             |           |
|------------------------------|----------------|-------------|-----------|-------------|-----------|-------------|-----------|-------------|-----------|-------------|-----------|
| <b>Propionic Acid</b>        | mcg/collection | BLOD        | NA        |
| <b>VOCs</b>                  |                | <b>Mean</b> | <b>SD</b> |
| <b>1,3-butadiene</b>         | mcg/collection | BLOD        | NA        | BLOD        | NA        | NT          | NT        | NT          | NT        | NT          | NT        |
| <b>Acrylonitrile</b>         | mcg/collection | BLOD        | NA        | BLOD        | NA        | NT          | NT        | NT          | NT        | NT          | NT        |
| <b>Benzene</b>               | mcg/collection | BLOQ        | NA        | BLOQ        | NA        | NT          | NT        | NT          | NT        | NT          | NT        |
| <b>Isoprene</b>              | mcg/collection | BLOD        | NA        | BLOD        | NA        | NT          | NT        | NT          | NT        | NT          | NT        |
| <b>Propylene Oxide</b>       | mcg/collection | BLOD        | NA        | BLOD        | NA        | NT          | NT        | NT          | NT        | NT          | NT        |
| <b>Toluene</b>               | mcg/collection | BLOQ        | NA        | BLOD        | NA        | NT          | NT        | NT          | NT        | NT          | NT        |
| <b>Esters &amp; Alcohols</b> |                | <b>Mean</b> | <b>SD</b> |
| <b>1-Butanol</b>             | mcg/collection | BLOD        | NA        | BLOD        | NA        | NT          | NT        | NT          | NT        | NT          | NT        |
| <b>Benzyl Acetate</b>        | mcg/collection | BLOD        | NA        | BLOD        | NA        | NT          | NT        | NT          | NT        | NT          | NT        |
| <b>Ethyl Acetate</b>         | mcg/collection | BLOD        | NA        | BLOD        | NA        | NT          | NT        | NT          | NT        | NT          | NT        |
| <b>Ethyl Acetoacetate</b>    | mcg/collection | BLOD        | NA        | BLOD        | NA        | NT          | NT        | NT          | NT        | NT          | NT        |
| <b>Isoamyl Acetate</b>       | mcg/collection | BLOD        | NA        | BLOD        | NA        | NT          | NT        | NT          | NT        | NT          | NT        |
| <b>Isobutyl Acetate</b>      | mcg/collection | BLOD        | NA        | BLOD        | NA        | NT          | NT        | NT          | NT        | NT          | NT        |
| <b>Methyl Acetate</b>        | mcg/collection | BLOD        | NA        | BLOQ        | NA        | NT          | NT        | NT          | NT        | NT          | NT        |

### 1.10 Ruby Menthol 18 mg/mL Intense Per Collection Analytical Stability Results

| Parameter/<br>Constituent   | Units         | T0          |           | T3          |           | T6          |           | T9          |           | T12         |           |
|-----------------------------|---------------|-------------|-----------|-------------|-----------|-------------|-----------|-------------|-----------|-------------|-----------|
| <b># of puffs</b>           | NA            | 80          |           | 76          |           | 79          |           | 85          |           | 73          |           |
| <b>pH</b>                   | NA            | 6.09        | 0.14      | 5.96        | 0.09      | 5.89        | 0.13      | 5.61        | 0.05      | 5.68        | 0.08      |
| <b>Primary Constituents</b> |               | <b>Mean</b> | <b>SD</b> |
| <b>Nicotine</b>             | mg/collection | 14.61       | 1.42      | 15.00       | 1.25      | 16.77       | 1.44      | 18.70       | 1.11      | 15.87       | 1.34      |
| <b>Glycerol</b>             | mg/collection | 382.94      | 37.90     | 387.76      | 32.23     | 416.76      | 27.33     | 444.51      | 13.76     | 393.29      | 32.54     |
| <b>Propylene Glycol</b>     | mg/collection | 511.76      | 52.76     | 522.18      | 44.49     | 540.31      | 47.07     | 602.83      | 33.68     | 545.58      | 47.37     |
| <b>Water</b>                | mg/collection | 43.34       | 2.67      | 57.91       | 1.74      | 67.49       | 4.84      | 72.39       | 2.59      | 98.16       | 3.31      |

|                                        |                |             |           |             |           |             |           |             |           |             |           |
|----------------------------------------|----------------|-------------|-----------|-------------|-----------|-------------|-----------|-------------|-----------|-------------|-----------|
| <b>Menthol</b>                         | mg/collection  | 8.15        | 0.87      | 8.21        | 0.65      | 8.89        | 0.83      | 9.67        | 0.59      | 8.25        | 0.79      |
| <b>Diethylene Glycol</b>               | mg/collection  | BLOD        | NA        |
| <b>Ethylene Glycol</b>                 | mg/collection  | BLOD        | NA        |
| <b>Carbonyls &amp; Glycidol</b>        |                | <b>Mean</b> | <b>SD</b> |
| <b>Acetaldehyde</b>                    | mcg/collection | 3.81        | 0.44      | 4.45        | 0.62      | 5.42        | 0.73      | 6.76        | 0.77      | 4.72        | 0.84      |
| <b>Acrolein</b>                        | mcg/collection | 1.82        | 0.55      | BLOQ        | NA        | 1.14        | 0.36      | BLOQ        | NA        | BLOQ        | NA        |
| <b>Diacetyl</b>                        | mcg/collection | BLOQ        | NA        |
| <b>Formaldehyde</b>                    | mcg/collection | 10.34       | 1.13      | 11.16       | 0.97      | 11.64       | 1.08      | 15.57       | 1.22      | 14.77       | 1.72      |
| <b>Glycidol</b>                        | mcg/collection | 4.69        | 1.20      | 3.01        | 0.88      | 3.73        | 0.84      | 3.15        | 0.39      | 4.82        | 0.78      |
| <b>Acetyl Propionyl</b>                | mcg/collection | BLOD        | NA        |
| <b>Butyraldehyde</b>                   | mcg/collection | BLOD        | NA        |
| <b>Crotonaldehyde</b>                  | mcg/collection | BLOD        | NA        |
| <b>Furfural</b>                        | mcg/collection | BLOD        | NA        |
| <b>Nicotine Degradants &amp; TSNAs</b> |                | <b>Mean</b> | <b>SD</b> |
| <b>β-Nicotyrine</b>                    | mcg/collection | BLOQ        | NA        | 1.95        | 0.65      | 4.08        | 1.35      | 5.50        | 1.92      | 4.53        | 1.22      |
| <b>Cotinine</b>                        | mcg/collection | 1.08        | 0.36      | BLOQ        | NA        | 2.08        | 0.26      | 4.95        | 1.46      | 2.67        | 0.32      |
| <b>Myosmine</b>                        | mcg/collection | 1.77        | 0.25      | 3.47        | 0.59      | 4.55        | 0.73      | 6.01        | 0.40      | 4.81        | 0.51      |
| <b>Nicotine N Oxide</b>                | mcg/collection | BLOQ        | NA        | BLOQ        | NA        | BLOQ        | NA        | 4.40        | 2.59      | BLOQ        | NA        |
| <b>Nornicotine</b>                     | mcg/collection | 2.81        | 0.47      | 5.10        | 1.69      | 8.14        | 2.94      | 16.57       | 2.60      | 11.66       | 3.38      |
| <b>Anabasine</b>                       | mcg/collection | BLOD        | NA        |
| <b>Anatabine</b>                       | mcg/collection | BLOD        | NA        |
| <b>NNK</b>                             | mcg/collection | BLOQ        | NA        | BLOQ        | NA        | NT          | NT        | NT          | NT        | NT          | NT        |
| <b>NNN</b>                             | mcg/collection | 0.01        | 0.0005    | 0.004       | 0.0003    | NT          | NT        | NT          | NT        | NT          | NT        |
| <b>Metals</b>                          |                | <b>Mean</b> | <b>SD</b> |
| <b>Arsenic</b>                         | ng/collection  | BLOD        | NA        |
| <b>Beryllium</b>                       | ng/collection  | BLOD        | NA        |
| <b>Cadmium</b>                         | ng/collection  | BLOD        | NA        |
| <b>Chromium</b>                        | ng/collection  | BLOD        | NA        |
| <b>Cobalt</b>                          | ng/collection  | BLOD        | NA        |

|                              |                |             |           |             |           |             |           |             |           |             |           |
|------------------------------|----------------|-------------|-----------|-------------|-----------|-------------|-----------|-------------|-----------|-------------|-----------|
| <b>Copper</b>                | ng/collection  | BLOD        | NA        |
| <b>Gold</b>                  | ng/collection  | BLOD        | NA        |
| <b>Iron</b>                  | ng/collection  | BLOD        | NA        |
| <b>Lead</b>                  | ng/collection  | BLOD        | NA        | BLOQ        | NA        | BLOD        | NA        | BLOD        | NA        | BLOD        | NA        |
| <b>Nickel</b>                | ng/collection  | BLOD        | NA        |
| <b>Selenium</b>              | ng/collection  | BLOQ        | NA        |
| <b>Silver</b>                | ng/collection  | BLOD        | NA        | BLOD        | NA        | BLOQ        | NA        | BLOD        | NA        | BLOD        | NA        |
| <b>Tin</b>                   | ng/collection  | BLOD        | NA        | BLOQ        | NA        | BLOD        | NA        | BLOD        | NA        | BLOD        | NA        |
| <b>Zinc</b>                  | ng/collection  | BLOD        | NA        |
| <b>Organic Acids</b>         |                | <b>Mean</b> | <b>SD</b> |
| <b>Benzoic Acid</b>          | mg/collection  | 11.72       | 1.61      | 11.91       | 0.69      | 10.47       | 1.41      | 13.93       | 1.98      | 8.83        | 0.88      |
| <b>Propionic Acid</b>        | mcg/collection | BLOD        | NA        |
| <b>VOCs</b>                  |                | <b>Mean</b> | <b>SD</b> |
| <b>1,3-butadiene</b>         | mcg/collection | BLOD        | NA        | BLOD        | NA        | NT          | NT        | NT          | NT        | NT          | NT        |
| <b>Acrylonitrile</b>         | mcg/collection | BLOD        | NA        | BLOD        | NA        | NT          | NT        | NT          | NT        | NT          | NT        |
| <b>Benzene</b>               | mcg/collection | BLOQ        | NA        | BLOQ        | NA        | NT          | NT        | NT          | NT        | NT          | NT        |
| <b>Isoprene</b>              | mcg/collection | BLOD        | NA        | BLOD        | NA        | NT          | NT        | NT          | NT        | NT          | NT        |
| <b>Propylene Oxide</b>       | mcg/collection | BLOD        | NA        | BLOD        | NA        | NT          | NT        | NT          | NT        | NT          | NT        |
| <b>Toluene</b>               | mcg/collection | BLOQ        | NA        | BLOQ        | NA        | NT          | NT        | NT          | NT        | NT          | NT        |
| <b>Esters &amp; Alcohols</b> |                | <b>Mean</b> | <b>SD</b> |
| <b>1-Butanol</b>             | mcg/collection | BLOD        | NA        | BLOD        | NA        | NT          | NT        | NT          | NT        | NT          | NT        |
| <b>Benzyl Acetate</b>        | mcg/collection | BLOD        | NA        | BLOD        | NA        | NT          | NT        | NT          | NT        | NT          | NT        |
| <b>Ethyl Acetate</b>         | mcg/collection | BLOD        | NA        | BLOD        | NA        | NT          | NT        | NT          | NT        | NT          | NT        |
| <b>Ethyl Acetoacetate</b>    | mcg/collection | BLOD        | NA        | BLOD        | NA        | NT          | NT        | NT          | NT        | NT          | NT        |
| <b>Isoamyl Acetate</b>       | mcg/collection | BLOD        | NA        | BLOD        | NA        | NT          | NT        | NT          | NT        | NT          | NT        |
| <b>Isobutyl Acetate</b>      | mcg/collection | BLOD        | NA        | BLOD        | NA        | NT          | NT        | NT          | NT        | NT          | NT        |
| <b>Methyl Acetate</b>        | mcg/collection | BLOD        | NA        | BLOQ        | NA        | NT          | NT        | NT          | NT        | NT          | NT        |



### 1.11 Summer Menthol 18 mg/mL Per Collection Analytical Stability Results

| Parameter/<br>Constituent   | Units          | T0     |       | T3     |       | T6     |       | T9     |       | T12    |       |
|-----------------------------|----------------|--------|-------|--------|-------|--------|-------|--------|-------|--------|-------|
| # of puffs                  | NA             | 126    |       | 127    |       | 138    |       | 127    |       | 117    |       |
| pH                          | NA             | 6.42   | 0.03  | 6.31   | 0.02  | 6.46   | 0.06  | 6.29   | 0.03  | 6.28   | 0.03  |
| Primary Constituents        |                | Mean   | SD    |
| Nicotine                    | mg/collection  | 16.77  | 0.67  | 16.14  | 0.93  | 18.64  | 1.23  | 18.95  | 0.40  | 15.84  | 0.89  |
| Glycerol                    | mg/collection  | 431.72 | 16.21 | 414.91 | 26.39 | 441.48 | 22.38 | 441.26 | 4.57  | 383.93 | 20.92 |
| Propylene Glycol            | mg/collection  | 560.18 | 22.80 | 535.87 | 30.67 | 582.59 | 40.60 | 583.44 | 11.70 | 514.03 | 29.23 |
| Water                       | mg/collection  | 41.89  | 2.28  | 69.54  | 3.28  | 80.53  | 14.76 | 79.41  | 2.22  | 132.76 | 6.10  |
| Menthol                     | mg/collection  | 9.48   | 0.39  | 8.76   | 0.50  | 9.77   | 0.69  | 9.97   | 0.30  | 8.28   | 0.49  |
| Diethylene Glycol           | mg/collection  | BLOD   | NA    |
| Ethylene Glycol             | mg/collection  | BLOD   | NA    |
| Carbonyls & Glycidol        |                | Mean   | SD    |
| Acetaldehyde                | mcg/collection | 1.28   | 0.09  | 1.53   | 0.11  | 1.77   | 0.11  | 1.73   | 0.23  | 1.78   | 0.65  |
| Acrolein                    | mcg/collection | BLOQ   | NA    |
| Diacetyl                    | mcg/collection | BLOD   | NA    | BLOQ   | NA    | BLOD   | NA    | BLOQ   | NA    | BLOQ   | NA    |
| Formaldehyde                | mcg/collection | 8.22   | 0.42  | 6.45   | 0.28  | 7.94   | 0.34  | 7.72   | 0.32  | 8.53   | 1.28  |
| Glycidol                    | mcg/collection | 1.83   | 0.20  | 1.88   | 0.45  | 1.87   | 0.44  | 1.77   | 0.33  | 1.77   | 0.22  |
| Acetyl Propionyl            | mcg/collection | BLOD   | NA    | BLOD   | NA    | BLOD   | NA    | BLOQ   | NA    | BLOD   | NA    |
| Butyraldehyde               | mcg/collection | BLOD   | NA    |
| Crotonaldehyde              | mcg/collection | BLOD   | NA    |
| Furfural                    | mcg/collection | BLOD   | NA    |
| Nicotine Degradants & TSNAs |                | Mean   | SD    |
| β-Nicotyrine                | mcg/collection | BLOQ   | NA    | BLOQ   | NA    | 1.47   | 0.10  | 1.03   | 0.15  | BLOQ   | NA    |
| Cotinine                    | mcg/collection | BLOQ   | NA    | BLOD   | NA    | BLOQ   | NA    | 2.23   | 0.92  | BLOQ   | NA    |
| Myosmine                    | mcg/collection | BLOQ   | NA    | 1.44   | 0.05  | 1.58   | 0.13  | 1.81   | 0.20  | 1.80   | 0.65  |
| Nicotine N Oxide            | mcg/collection | 1.62   | 0.82  | BLOQ   | NA    | 0.94   | 0.20  | 3.52   | 1.40  | BLOQ   | NA    |

|                       |                |             |           |             |           |             |           |             |           |             |           |
|-----------------------|----------------|-------------|-----------|-------------|-----------|-------------|-----------|-------------|-----------|-------------|-----------|
| <b>Nornicotine</b>    | mcg/collection | 2.35        | 0.14      | 4.12        | 0.38      | 5.74        | 0.36      | 8.60        | 1.34      | 6.56        | 0.97      |
| <b>Anabasine</b>      | mcg/collection | BLOD        | NA        |
| <b>Anatabine</b>      | mcg/collection | BLOD        | NA        |
| <b>NNK</b>            | mcg/collection | BLOQ        | NA        | BLOQ        | NA        | NT          | NT        | NT          | NT        | NT          | NT        |
| <b>NNN</b>            | mcg/collection | BLOD        | NA        | BLOD        | NA        | NT          | NT        | NT          | NT        | NT          | NT        |
| <b>Metals</b>         |                | <b>Mean</b> | <b>SD</b> |
| <b>Arsenic</b>        | ng/collection  | BLOD        | NA        |
| <b>Beryllium</b>      | ng/collection  | BLOD        | NA        |
| <b>Cadmium</b>        | ng/collection  | BLOD        | NA        |
| <b>Chromium</b>       | ng/collection  | BLOD        | NA        |
| <b>Cobalt</b>         | ng/collection  | BLOD        | NA        |
| <b>Copper</b>         | ng/collection  | BLOD        | NA        |
| <b>Gold</b>           | ng/collection  | BLOD        | NA        |
| <b>Iron</b>           | ng/collection  | BLOD        | NA        |
| <b>Lead</b>           | ng/collection  | BLOD        | NA        |
| <b>Nickel</b>         | ng/collection  | BLOD        | NA        |
| <b>Selenium</b>       | ng/collection  | BLOQ        | NA        | BLOQ        | NA        | BLOQ        | NA        | BLOD        | NA        | BLOD        | NA        |
| <b>Silver</b>         | ng/collection  | BLOD        | NA        | BLOD        | NA        | BLOQ        | NA        | BLOD        | NA        | BLOD        | NA        |
| <b>Tin</b>            | ng/collection  | BLOD        | NA        |
| <b>Zinc</b>           | ng/collection  | BLOQ        | NA        | BLOD        | NA        | BLOD        | NA        | BLOD        | NA        | BLOD        | NA        |
| <b>Organic Acids</b>  |                | <b>Mean</b> | <b>SD</b> |
| <b>Benzoic Acid</b>   | mg/collection  | 8.41        | 1.01      | 11.09       | 0.75      | 10.87       | 0.79      | 12.89       | 1.36      | 9.13        | 1.08      |
| <b>Propionic Acid</b> | mcg/collection | BLOD        | NA        |
| <b>VOCs</b>           |                | <b>Mean</b> | <b>SD</b> |
| <b>1,3-butadiene</b>  | mcg/collection | BLOD        | NA        | BLOD        | NA        | NT          | NT        | NT          | NT        | NT          | NT        |
| <b>Acrylonitrile</b>  | mcg/collection | BLOD        | NA        | BLOD        | NA        | NT          | NT        | NT          | NT        | NT          | NT        |
| <b>Benzene</b>        | mcg/collection | BLOQ        | NA        | BLOQ        | NA        | NT          | NT        | NT          | NT        | NT          | NT        |
| <b>Isoprene</b>       | mcg/collection | BLOD        | NA        | BLOD        | NA        | NT          | NT        | NT          | NT        | NT          | NT        |

|                              |                |             |           |             |           |             |           |             |           |             |           |
|------------------------------|----------------|-------------|-----------|-------------|-----------|-------------|-----------|-------------|-----------|-------------|-----------|
| <b>Propylene Oxide</b>       | mcg/collection | BLOD        | NA        | BLOD        | NA        | NT          | NT        | NT          | NT        | NT          | NT        |
| <b>Toluene</b>               | mcg/collection | BLOQ        | NA        | BLOD        | NA        | NT          | NT        | NT          | NT        | NT          | NT        |
| <b>Esters &amp; Alcohols</b> |                | <b>Mean</b> | <b>SD</b> |
| <b>1-Butanol</b>             | mcg/collection | BLOD        | NA        | BLOD        | NA        | NT          | NT        | NT          | NT        | NT          | NT        |
| <b>Benzyl Acetate</b>        | mcg/collection | BLOD        | NA        | BLOD        | NA        | NT          | NT        | NT          | NT        | NT          | NT        |
| <b>Ethyl Acetate</b>         | mcg/collection | 170.84      | 18.00     | 130.88      | 12.86     | NT          | NT        | NT          | NT        | NT          | NT        |
| <b>Ethyl Acetoacetate</b>    | mcg/collection | BLOD        | NA        | BLOD        | NA        | NT          | NT        | NT          | NT        | NT          | NT        |
| <b>Isoamyl Acetate</b>       | mcg/collection | BLOD        | NA        | BLOD        | NA        | NT          | NT        | NT          | NT        | NT          | NT        |
| <b>Isobutyl Acetate</b>      | mcg/collection | BLOD        | NA        | BLOD        | NA        | NT          | NT        | NT          | NT        | NT          | NT        |
| <b>Methyl Acetate</b>        | mcg/collection | BLOD        | NA        | BLOQ        | NA        | NT          | NT        | NT          | NT        | NT          | NT        |

### 1.12 Summer Menthol 18 mg/mL Intense Per Collection Per Collection Analytical Stability Results

| Parameter/<br>Constituent       | Units          | T0          |           | T3          |           | T6          |           | T9          |           | T12         |           |
|---------------------------------|----------------|-------------|-----------|-------------|-----------|-------------|-----------|-------------|-----------|-------------|-----------|
| <b># of puffs</b>               | NA             | 86          |           | 80          |           | 74          |           | 86          |           | 69          |           |
| <b>pH</b>                       | NA             | 6.40        | 0.06      | 6.51        | 0.05      | 6.40        | 0.11      | 6.25        | 0.07      | 6.29        | 0.04      |
| <b>Primary Constituents</b>     |                | <b>Mean</b> | <b>SD</b> |
| <b>Nicotine</b>                 | mg/collection  | 16.74       | 1.45      | 16.85       | 0.85      | 17.44       | 1.61      | 18.56       | 0.78      | 15.15       | 1.66      |
| <b>Glycerol</b>                 | mg/collection  | 432.87      | 36.94     | 432.90      | 23.99     | 425.10      | 25.37     | 437.62      | 12.04     | 371.89      | 38.35     |
| <b>Propylene Glycol</b>         | mg/collection  | 562.00      | 51.65     | 561.75      | 27.39     | 539.18      | 47.62     | 572.17      | 23.49     | 495.34      | 57.27     |
| <b>Water</b>                    | mg/collection  | 53.05       | 2.22      | 68.72       | 0.92      | 72.22       | 3.79      | 81.61       | 1.78      | 98.02       | 5.69      |
| <b>Menthol</b>                  | mg/collection  | 9.37        | 0.87      | 9.20        | 0.41      | 9.21        | 0.89      | 9.53        | 0.37      | 7.77        | 0.91      |
| <b>Diethylene Glycol</b>        | mg/collection  | BLOD        | NA        |
| <b>Ethylene Glycol</b>          | mg/collection  | BLOD        | NA        |
| <b>Carbonyls &amp; Glycidol</b> |                | <b>Mean</b> | <b>SD</b> |
| <b>Acetaldehyde</b>             | mcg/collection | 1.95        | 0.21      | 1.88        | 0.21      | 1.56        | 0.12      | 2.23        | 0.30      | BLOQ        | NA        |
| <b>Acrolein</b>                 | mcg/collection | 2.07        | 0.29      | BLOQ        | NA        | BLOQ        | NA        | BLOQ        | NA        | BLOQ        | NA        |
| <b>Diacetyl</b>                 | mcg/collection | BLOD        | NA        | BLOQ        | NA        | BLOQ        | NA        | BLOQ        | NA        | BLOQ        | NA        |

|                                        |                |             |           |             |           |             |           |             |           |             |           |
|----------------------------------------|----------------|-------------|-----------|-------------|-----------|-------------|-----------|-------------|-----------|-------------|-----------|
| <b>Formaldehyde</b>                    | mcg/collection | 10.98       | 1.01      | 9.86        | 0.85      | 7.74        | 0.70      | 9.84        | 0.70      | 8.21        | 0.48      |
| <b>Glycidol</b>                        | mcg/collection | 3.57        | 0.86      | 3.07        | 0.49      | 2.87        | 0.45      | 2.35        | 1.00      | 3.96        | 0.53      |
| <b>Acetyl Propionyl</b>                | mcg/collection | BLOD        | NA        |
| <b>Butyraldehyde</b>                   | mcg/collection | BLOD        | NA        |
| <b>Crotonaldehyde</b>                  | mcg/collection | BLOD        | NA        |
| <b>Furfural</b>                        | mcg/collection | BLOD        | NA        |
| <b>Nicotine Degradants &amp; TSNAs</b> |                | <b>Mean</b> | <b>SD</b> |
| <b>β-Nicotyrine</b>                    | mcg/collection | BLOQ        | NA        | BLOQ        | NA        | 1.36        | 0.12      | 1.20        | 0.33      | 1.14        | 0.27      |
| <b>Cotinine</b>                        | mcg/collection | BLOQ        | NA        | BLOD        | NA        | BLOQ        | NA        | 2.29        | 1.23      | BLOQ        | NA        |
| <b>Myosmine</b>                        | mcg/collection | BLOQ        | NA        | 1.69        | 0.22      | 1.46        | 0.10      | 2.00        | 0.18      | 1.33        | 0.16      |
| <b>Nicotine N Oxide</b>                | mcg/collection | BLOQ        | NA        | BLOQ        | NA        | BLOQ        | NA        | 3.19        | 1.93      | BLOQ        | NA        |
| <b>Nornicotine</b>                     | mcg/collection | 2.67        | 0.33      | 4.44        | 0.55      | 4.52        | 0.28      | 8.33        | 1.86      | 5.10        | 0.70      |
| <b>Anabasine</b>                       | mcg/collection | BLOD        | NA        |
| <b>Anatabine</b>                       | mcg/collection | BLOD        | NA        |
| <b>NNK</b>                             | mcg/collection | BLOQ        | NA        | BLOQ        | NA        | NT          | NT        | NT          | NT        | NT          | NT        |
| <b>NNN</b>                             | mcg/collection | BLOD        | NA        | BLOD        | NA        | NT          | NT        | NT          | NT        | NT          | NT        |
| <b>Metals</b>                          |                | <b>Mean</b> | <b>SD</b> |
| <b>Arsenic</b>                         | ng/collection  | BLOD        | NA        |
| <b>Beryllium</b>                       | ng/collection  | BLOD        | NA        |
| <b>Cadmium</b>                         | ng/collection  | BLOD        | NA        |
| <b>Chromium</b>                        | ng/collection  | BLOD        | NA        |
| <b>Cobalt</b>                          | ng/collection  | BLOD        | NA        |
| <b>Copper</b>                          | ng/collection  | BLOD        | NA        |
| <b>Gold</b>                            | ng/collection  | BLOD        | NA        |
| <b>Iron</b>                            | ng/collection  | BLOD        | NA        |
| <b>Lead</b>                            | ng/collection  | BLOD        | NA        |
| <b>Nickel</b>                          | ng/collection  | BLOD        | NA        |
| <b>Selenium</b>                        | ng/collection  | BLOQ        | NA        |

|                              |                |             |           |             |           |             |           |             |           |             |           |
|------------------------------|----------------|-------------|-----------|-------------|-----------|-------------|-----------|-------------|-----------|-------------|-----------|
| <b>Silver</b>                | ng/collection  | BLOD        | NA        | BLOD        | NA        | BLOQ        | NA        | BLOD        | NA        | BLOD        | NA        |
| <b>Tin</b>                   | ng/collection  | BLOD        | NA        |
| <b>Zinc</b>                  | ng/collection  | BLOD        | NA        |
| <b>Organic Acids</b>         |                | <b>Mean</b> | <b>SD</b> |
| <b>Benzoic Acid</b>          | mcg/collection | 13.13       | 0.84      | 11.50       | 1.28      | 10.04       | 0.95      | 14.25       | 1.25      | 8.76        | 0.67      |
| <b>Propionic Acid</b>        | mcg/collection | BLOD        | NA        |
| <b>VOCs</b>                  |                | <b>Mean</b> | <b>SD</b> |
| <b>1,3-butadiene</b>         | mcg/collection | BLOD        | NA        | BLOD        | NA        | NT          | NT        | NT          | NT        | NT          | NT        |
| <b>Acrylonitrile</b>         | mcg/collection | BLOD        | NA        | BLOD        | NA        | NT          | NT        | NT          | NT        | NT          | NT        |
| <b>Benzene</b>               | mcg/collection | BLOQ        | NA        | BLOQ        | NA        | NT          | NT        | NT          | NT        | NT          | NT        |
| <b>Isoprene</b>              | mcg/collection | BLOD        | NA        | BLOD        | NA        | NT          | NT        | NT          | NT        | NT          | NT        |
| <b>Propylene Oxide</b>       | mcg/collection | BLOD        | NA        | BLOD        | NA        | NT          | NT        | NT          | NT        | NT          | NT        |
| <b>Toluene</b>               | mcg/collection | BLOQ        | NA        | BLOQ        | NA        | NT          | NT        | NT          | NT        | NT          | NT        |
| <b>Esters &amp; Alcohols</b> |                | <b>Mean</b> | <b>SD</b> |
| <b>1-Butanol</b>             | mcg/collection | BLOD        | NA        | BLOD        | NA        | NT          | NT        | NT          | NT        | NT          | NT        |
| <b>Benzyl Acetate</b>        | mcg/collection | BLOD        | NA        | BLOD        | NA        | NT          | NT        | NT          | NT        | NT          | NT        |
| <b>Ethyl Acetate</b>         | mcg/collection | 178.52      | 9.38      | 144.40      | 3.17      | NT          | NT        | NT          | NT        | NT          | NT        |
| <b>Ethyl Acetoacetate</b>    | mcg/collection | BLOD        | NA        | BLOD        | NA        | NT          | NT        | NT          | NT        | NT          | NT        |
| <b>Isoamyl Acetate</b>       | mcg/collection | BLOD        | NA        | BLOD        | NA        | NT          | NT        | NT          | NT        | NT          | NT        |
| <b>Isobutyl Acetate</b>      | mcg/collection | BLOD        | NA        | BLOD        | NA        | NT          | NT        | NT          | NT        | NT          | NT        |
| <b>Methyl Acetate</b>        | mcg/collection | BLOD        | NA        | BLOQ        | NA        | NT          | NT        | NT          | NT        | NT          | NT        |
