# Supplementary material for: A Practical Framework for Novel Electronic Nicotine Delivery System Evaluation: Chemical and Toxicological Characterization of JUUL2 Aerosol and Comparison with Reference Cigarettes
Source: MDPI journal article supplement (doi:10.3390/toxics12010041), 2024-01-04
Supplement: s1 [file s1]

## *Supplementary Materials File S5*

### 1 Percent Difference to Combustible Cigarettes

#### 1.1 Virginia Tobacco 18 mg/mL Non-Intense Percent Difference to Combustible Cigarettes

| Parameter/<br>Constituent             | Aerosol or Smoke Yields Normalized by Nicotine (mg/mg) |           | % Diff vs CC |
|---------------------------------------|--------------------------------------------------------|-----------|--------------|
|                                       | AEROSOL<br>MAX                                         | CC        |              |
| # of puffs                            | 150                                                    | NA        | NA           |
| pH                                    | 6.19                                                   | NA        | NA           |
| <b>Primary Constituents</b>           |                                                        |           |              |
| Nicotine                              | 1.00E+00                                               | 1.00E+00  | NA           |
| Glycerol                              | 4.35E+01                                               | 8.95E-01  | ↑ 4762.55%   |
| Propylene Glycol                      | 2.50E+01                                               | 4.21E-03  | ↑ 593469.80% |
| Water                                 | 5.68E+00                                               | 4.21E+00  | ↑ 34.96%     |
| Menthol                               | ~ 5.69E-02                                             | ~1.32E-05 | NC           |
| Diethylene Glycol                     | ~ 5.33E-03                                             | ~1.42E-03 | NC           |
| Ethylene Glycol                       | ~ 5.71E-03                                             | 9.96E-03  | ↓ ≥ 42.68%   |
| <b>Carbonyls &amp; Glycidol</b>       |                                                        |           |              |
| Acetaldehyde                          | 2.74E-04                                               | 7.24E-01  | ↓ 99.96%     |
| Acrolein                              | 1.78E-04                                               | 5.96E-02  | ↓ 99.70%     |
| Diacetyl                              | ~ 3.90E-05                                             | 1.64E-01  | ↓ ≥ 99.98%   |
| Formaldehyde                          | 1.13E-03                                               | 3.74E-02  | ↓ 96.98%     |
| Glycidol                              | 2.39E-04                                               | 1.04E-03  | ↓ 76.91%     |
| Acetyl Propionyl                      | ~ 3.58E-06                                             | 4.21E-02  | ↓ ≥ 99.99%   |
| Butyraldehyde                         | ~ 3.64E-06                                             | 3.33E-02  | ↓ ≥ 99.99%   |
| Crotonaldehyde                        | ~ 5.74E-06                                             | 1.53E-02  | ↓ ≥ 99.96%   |
| Furfural                              | ~ 5.88E-06                                             | 1.84E-02  | ↓ ≥ 99.97%   |
| <b>Nicotine Degradants &amp; TSNA</b> |                                                        |           |              |
| β-Nicotyrine                          | 1.35E-04                                               | 1.07E-02  | ↓ 98.73%     |
| Cotinine                              | 2.41E-03                                               | 6.96E-03  | ↓ 65.35%     |
| Myosmine                              | 1.99E-03                                               | NA        | NA           |
| Nicotine N Oxide                      | 7.73E-05                                               | ~5.37E-04 | NC           |
| Nornicotine                           | 7.91E-04                                               | 9.50E-03  | ↓ 91.67%     |
| Anabasine                             | ~ 2.88E-06                                             | 8.33E-04  | ↓ ≥ 99.65%   |
| Anatabine                             | ~ 2.66E-05                                             | 6.00E-03  | ↓ ≥ 99.56%   |
| NNK                                   | ~ 7.49E-07                                             | 9.85E-05  | ↓ ≥ 99.24%   |
| NNN                                   | ~ 8.99E-08                                             | 1.18E-04  | ↓ ≥ 99.92%   |
| <b>Metals</b>                         |                                                        |           |              |
| Arsenic                               | ~ 1.78E-06                                             | NA        | NA           |

|                                              |            |           |             |
|----------------------------------------------|------------|-----------|-------------|
| <b>Beryllium</b>                             | ~ 6.97E-08 | NA        | NA          |
| <b>Cadmium</b>                               | ~ 3.17E-08 | 3.35E-05  | ↓ ≥ 99.91%  |
| <b>Chromium</b>                              | ~ 1.90E-06 | ~6.27E-07 | NC          |
| <b>Cobalt</b>                                | ~ 1.58E-08 | NA        | NA          |
| <b>Copper</b>                                | ~ 2.72E-06 | 1.64E-05  | ↓ ≥ 83.36%  |
| <b>Gold</b>                                  | ~ 4.63E-06 | NA        | NA          |
| <b>Iron</b>                                  | ~ 8.17E-06 | NA        | NA          |
| <b>Lead</b>                                  | ~ 7.92E-08 | ~4.18E-07 | NC          |
| <b>Nickel</b>                                | ~ 1.58E-07 | ~9.64E-07 | NC          |
| <b>Selenium</b>                              | 1.40E-06   | NA        | NA          |
| <b>Silver</b>                                | ~ 3.17E-08 | NA        | NA          |
| <b>Tin</b>                                   | ~ 1.63E-06 | NA        | NA          |
| <b>Zinc</b>                                  | ~ 1.36E-05 | NA        | NA          |
| <b>Organic Acids</b>                         |            |           |             |
| <b>Benzoic Acid</b>                          | 5.67E-01   | NA        | NA          |
| <b>Propionic Acid</b>                        | ~ 1.76E-03 | NA        | NA          |
| <b>VOCs</b>                                  |            |           |             |
| <b>1,3-Butadiene</b>                         | ~ 1.49E-06 | NA        | NA          |
| <b>Acrylonitrile</b>                         | ~ 9.79E-07 | 9.71E-03  | ↓ ≥ 99.99%  |
| <b>Benzene</b>                               | ~ 1.71E-06 | 4.58E-02  | ↓ ≥ 99.99%  |
| <b>Isoprene</b>                              | ~ 2.30E-06 | NA        | NA          |
| <b>Propylene Oxide</b>                       | ~ 3.96E-06 | 8.44E-01  | ↓ ≥ 99.99%  |
| <b>Toluene</b>                               | ~ 1.21E-05 | 7.35E-02  | ↓ ≥ 99.98%  |
| <b>Esters &amp; Alcohols</b>                 |            |           |             |
| <b>1-Butanol</b>                             | ~ 4.41E-05 | NA        | NA          |
| <b>Benzyl Acetate</b>                        | ~ 6.84E-05 | NA        | NA          |
| <b>Ethyl Acetate</b>                         | ~ 7.83E-05 | NA        | NA          |
| <b>Ethyl Acetoacetate</b>                    | ~ 5.59E-05 | NA        | NA          |
| <b>Isoamyl Acetate</b>                       | ~ 4.77E-05 | NA        | NA          |
| <b>Isobutyl Acetate</b>                      | ~ 4.73E-05 | NA        | NA          |
| <b>Methyl Acetate</b>                        | ~ 5.08E-05 | NA        | NA          |
| Average Difference                           |            |           | ↑ 22927.46% |
| Average Difference without PG, VG, and Water |            |           | ↓ 93.63%    |

## 1.2 Virginia Tobacco 18 mg/mL Intense Percent Difference to Combustible Cigarettes

| Parameter/<br>Constituent | Aerosol or Smoke Yields Normalized by Nicotine (mg/mg) |    | % Diff vs CC |
|---------------------------|--------------------------------------------------------|----|--------------|
|                           | AEROSOL<br>MAX                                         | CC |              |
| # of puffs                | 87                                                     | NA | NA           |

|                                         |            |           |              |
|-----------------------------------------|------------|-----------|--------------|
| <b>pH</b>                               | 6.46       | NA        | NA           |
| <b>Primary Constituents</b>             |            |           |              |
| <b>Nicotine</b>                         | 1.00E+00   | 1.00E+00  | NA           |
| <b>Glycerol</b>                         | 4.16E+01   | 1.20E+00  | ↑ 3375.92%   |
| <b>Propylene Glycol</b>                 | 2.53E+01   | 1.36E-02  | ↑ 185337.92% |
| <b>Water</b>                            | 5.00E+00   | 7.94E+00  | ↓ 37.02%     |
| <b>Menthol</b>                          | ~ 4.74E-03 | ~4.76E-06 | NC           |
| <b>Diethylene Glycol</b>                | ~ 5.00E-03 | ~9.90E-04 | NC           |
| <b>Ethylene Glycol</b>                  | ~ 5.36E-03 | 1.73E-02  | ↓ ≥ 69.09%   |
| <b>Carbonyls &amp; Glycidol</b>         |            |           |              |
| <b>Acetaldehyde</b>                     | 3.96E-04   | 8.19E-01  | ↓ 99.95%     |
| <b>Acrolein</b>                         | 4.05E-04   | 8.12E-02  | ↓ 99.50%     |
| <b>Diacetyl</b>                         | ~ 4.27E-05 | 1.69E-01  | ↓ ≥ 99.97%   |
| <b>Formaldehyde</b>                     | 1.48E-03   | 5.47E-02  | ↓ 97.29%     |
| <b>Glycidol</b>                         | 3.37E-04   | 1.01E-03  | ↓ 66.69%     |
| <b>Acetyl Propionyl</b>                 | ~ 3.92E-06 | 4.62E-02  | ↓ ≥ 99.99%   |
| <b>Butyraldehyde</b>                    | ~ 4.01E-05 | 4.23E-02  | ↓ ≥ 99.91%   |
| <b>Crotonaldehyde</b>                   | ~ 6.29E-06 | 2.89E-02  | ↓ ≥ 99.98%   |
| <b>Furfural</b>                         | ~ 4.32E-05 | 1.49E-02  | ↓ ≥ 99.71%   |
| <b>Nicotine Degradants &amp; TSNA's</b> |            |           |              |
| <b>β-Nicotyrine</b>                     | 1.74E-04   | 3.50E-03  | ↓ 95.04%     |
| <b>Cotinine</b>                         | 2.54E-03   | 7.09E-03  | ↓ 64.14%     |
| <b>Myosmine</b>                         | 1.98E-03   | 6.55E-03  | ↓ 69.80%     |
| <b>Nicotine N Oxide</b>                 | 6.33E-05   | ~3.26E-04 | NC           |
| <b>Nornicotine</b>                      | 8.71E-04   | 1.09E-02  | ↓ 92.05%     |
| <b>Anabasine</b>                        | ~ 3.15E-06 | 5.10E-04  | ↓ ≥ 99.38%   |
| <b>Anatabine</b>                        | ~ 3.26E-05 | 3.08E-03  | ↓ ≥ 98.94%   |
| <b>NNK</b>                              | ~ 7.83E-07 | 9.86E-05  | ↓ ≥ 99.21%   |
| <b>NNN</b>                              | ~ 9.41E-08 | 1.12E-04  | ↓ ≥ 99.92%   |
| <b>Metals</b>                           |            |           |              |
| <b>Arsenic</b>                          | ~ 2.97E-07 | NA        | NA           |
| <b>Beryllium</b>                        | ~ 6.54E-08 | NA        | NA           |
| <b>Cadmium</b>                          | ~ 2.97E-08 | 4.01E-05  | ↓ ≥ 99.93%   |
| <b>Chromium</b>                         | 4.11E-06   | ~3.95E-07 | ↑ ≥ 940.13%  |
| <b>Cobalt</b>                           | ~ 1.49E-08 | NA        | NA           |
| <b>Copper</b>                           | ~ 7.43E-07 | 1.23E-05  | ↓ ≥ 93.95%   |
| <b>Gold</b>                             | ~ 4.84E-06 | NA        | NA           |
| <b>Iron</b>                             | 3.40E-05   | NA        | NA           |
| <b>Lead</b>                             | ~ 7.43E-08 | 1.79E-05  | ↓ ≥ 99.59%   |
| <b>Nickel</b>                           | ~ 4.27E-07 | ~7.89E-07 | NC           |

|                                                        |            |          |            |
|--------------------------------------------------------|------------|----------|------------|
| <b>Selenium</b>                                        | ~ 7.11E-07 | NA       | NA         |
| <b>Silver</b>                                          | ~ 1.64E-07 | NA       | NA         |
| <b>Tin</b>                                             | ~ 1.71E-06 | NA       | NA         |
| <b>Zinc</b>                                            | ~ 4.46E-06 | NA       | NA         |
| <b>Organic Acids</b>                                   |            |          |            |
| <b>Benzoic Acid</b>                                    | 7.84E-01   | NA       | NA         |
| <b>Propionic Acid</b>                                  | ~ 2.43E-03 | NA       | NA         |
| <b>VOCs</b>                                            |            |          |            |
| <b>1,3-Butadiene</b>                                   | ~ 1.56E-06 | NA       | NA         |
| <b>Acrylonitrile</b>                                   | ~ 1.02E-06 | 1.27E-02 | ↓ ≥ 99.99% |
| <b>Benzene</b>                                         | ~ 1.79E-06 | 4.64E-02 | ↓ ≥ 99.99% |
| <b>Isoprene</b>                                        | ~ 2.41E-06 | NA       | NA         |
| <b>Propylene Oxide</b>                                 | ~ 4.15E-06 | 9.00E-04 | ↓ ≥ 99.54% |
| <b>Toluene</b>                                         | ~ 1.27E-05 | 7.91E-02 | ↓ ≥ 99.98% |
| <b>Esters &amp; Alcohols</b>                           |            |          |            |
| <b>1-Butanol</b>                                       | ~ 4.61E-05 | NA       | NA         |
| <b>Benzyl Acetate</b>                                  | ~ 7.16E-05 | NA       | NA         |
| <b>Ethyl Acetate</b>                                   | ~ 8.19E-05 | NA       | NA         |
| <b>Ethyl Acetoacetate</b>                              | ~ 5.85E-05 | NA       | NA         |
| <b>Isoamyl Acetate</b>                                 | ~ 4.99E-05 | NA       | NA         |
| <b>Isobutyl Acetate</b>                                | ~ 4.94E-05 | NA       | NA         |
| <b>Methyl Acetate</b>                                  | ~ 5.32E-05 | NA       | NA         |
| Average Difference                                     |            |          | ↑ 6654.76% |
| Average Difference without PG, VG, Water, and Chromium |            |          | ↓ 93.74%   |

### 1.3 Crisp Menthol 18 mg/mL Non-Intense Percent Difference to Combustible Cigarettes

| Parameter/<br>Constituent       | Aerosol or Smoke Yields Normalized by Nicotine (mg/mg) |           | % Diff vs CC    |
|---------------------------------|--------------------------------------------------------|-----------|-----------------|
|                                 | AEROSOL<br>MAX                                         | CC        |                 |
| <b># of puffs</b>               | 125                                                    | NA        | NA              |
| <b>pH</b>                       | 6.36                                                   | NA        | NA              |
| <b>Primary Constituents</b>     |                                                        |           |                 |
| <b>Nicotine</b>                 | 1.00E+00                                               | 1.00E+00  | NA              |
| <b>Glycerol</b>                 | 2.69E+01                                               | 8.95E-01  | ↑ 2901.15%      |
| <b>Propylene Glycol</b>         | 3.80E+01                                               | 4.21E-03  | ↑ 902232.62%    |
| <b>Water</b>                    | 4.66E+00                                               | 4.21E+00  | ↑ 10.57%        |
| <b>Menthol</b>                  | 7.39E-01                                               | ~1.32E-05 | ↑ ≥ 5615211.37% |
| <b>Diethylene Glycol</b>        | ~ 5.19E-03                                             | ~1.42E-03 | NC              |
| <b>Ethylene Glycol</b>          | ~ 5.55E-03                                             | 9.96E-03  | ↓ ≥ 44.22%      |
| <b>Carbonyls &amp; Glycidol</b> |                                                        |           |                 |

|                                        |            |           |            |
|----------------------------------------|------------|-----------|------------|
| Acetaldehyde                           | 1.67E-04   | 7.24E-01  | ↓ 99.98%   |
| Acrolein                               | 1.06E-04   | 5.96E-02  | ↓ 99.82%   |
| Diacetyl                               | ~ 3.83E-05 | 1.64E-01  | ↓ ≥ 99.98% |
| Formaldehyde                           | 7.17E-04   | 3.74E-02  | ↓ 98.09%   |
| Glycidol                               | 1.66E-04   | 1.04E-03  | ↓ 84.02%   |
| Acetyl Propionyl                       | ~ 3.49E-06 | 4.21E-02  | ↓ ≥ 99.99% |
| Butyraldehyde                          | ~ 3.69E-06 | 3.33E-02  | ↓ ≥ 99.99% |
| Crotonaldehyde                         | ~ 5.59E-06 | 1.53E-02  | ↓ ≥ 99.96% |
| Furfural                               | ~ 5.72E-06 | 1.84E-02  | ↓ ≥ 99.97% |
| <b>Nicotine Degradants &amp; TSNAs</b> |            |           |            |
| β-Nicotyrine                           | 2.46E-04   | 1.07E-02  | ↓ 97.69%   |
| Cotinine                               | ~ 3.07E-05 | 6.96E-03  | ↓ ≥ 99.56% |
| Myosmine                               | 1.66E-04   | NA        | NA         |
| Nicotine N Oxide                       | 1.03E-04   | ~5.37E-04 | NC         |
| Nornicotine                            | 8.85E-04   | 9.50E-03  | ↓ 90.68%   |
| Anabasine                              | ~ 2.80E-06 | 8.33E-04  | ↓ ≥ 99.66% |
| Anatabine                              | ~ 2.79E-06 | 6.00E-03  | ↓ ≥ 99.95% |
| NNK                                    | ~ 7.85E-07 | 9.85E-05  | ↓ ≥ 99.20% |
| NNN                                    | ~ 9.42E-08 | 1.18E-04  | ↓ ≥ 99.92% |
| <b>Metals</b>                          |            |           |            |
| Arsenic                                | ~ 3.08E-07 | NA        | NA         |
| Beryllium                              | ~ 6.78E-08 | NA        | NA         |
| Cadmium                                | ~ 3.08E-08 | 3.35E-05  | ↓ ≥ 99.91% |
| Chromium                               | ~ 1.71E-06 | ~6.27E-07 | NC         |
| Cobalt                                 | ~ 1.54E-08 | NA        | NA         |
| Copper                                 | ~ 2.85E-06 | 1.64E-05  | ↓ ≥ 82.56% |
| Gold                                   | ~ 4.85E-06 | NA        | NA         |
| Iron                                   | 1.22E-05   | NA        | NA         |
| Lead                                   | ~ 7.71E-08 | ~4.18E-07 | NC         |
| Nickel                                 | ~ 1.54E-07 | ~9.64E-07 | NC         |
| Selenium                               | ~ 7.37E-07 | NA        | NA         |
| Silver                                 | ~ 3.08E-08 | NA        | NA         |
| Tin                                    | ~ 1.81E-06 | NA        | NA         |
| Zinc                                   | ~ 1.43E-05 | NA        | NA         |
| <b>Organic Acids</b>                   |            |           |            |
| Benzoic Acid                           | 6.20E-01   | NA        | NA         |
| Propionic Acid                         | ~ 1.20E-03 | NA        | NA         |
| <b>VOCs</b>                            |            |           |            |
| 1,3-Butadiene                          | ~ 1.57E-06 | NA        | NA         |
| Acrylonitrile                          | ~ 1.03E-06 | 9.71E-03  | ↓ ≥ 99.99% |

|                                                       |            |          |              |
|-------------------------------------------------------|------------|----------|--------------|
| <b>Benzene</b>                                        | ~ 1.80E-06 | 4.58E-02 | ↓ ≥ 99.99%   |
| <b>Isoprene</b>                                       | ~ 2.41E-06 | NA       | NA           |
| <b>Propylene Oxide</b>                                | ~ 4.15E-06 | 8.44E-01 | ↓ ≥ 99.99%   |
| <b>Toluene</b>                                        | ~ 2.64E-06 | 7.35E-02 | ↓ ≥ 99.99%   |
| <b>Esters &amp; Alcohols</b>                          |            |          |              |
| <b>1-Butanol</b>                                      | ~ 4.62E-05 | NA       | NA           |
| <b>Benzyl Acetate</b>                                 | ~ 7.17E-05 | NA       | NA           |
| <b>Ethyl Acetate</b>                                  | 6.31E-03   | NA       | NA           |
| <b>Ethyl Acetoacetate</b>                             | ~ 5.86E-05 | NA       | NA           |
| <b>Isoamyl Acetate</b>                                | ~ 5.00E-05 | NA       | NA           |
| <b>Isobutyl Acetate</b>                               | ~ 4.95E-05 | NA       | NA           |
| <b>Methyl Acetate</b>                                 | ~ 5.33E-05 | NA       | NA           |
| Average Difference                                    |            |          | ↑ 241413.36% |
| Average Difference without PG, VG, Water, and Menthol |            |          | ↓ 95.44%     |

#### 1.4 Crisp Menthol 18 mg/mL Intense Percent Difference to Combustible Cigarettes

| Parameter/<br>Constituent              | Aerosol or Smoke Yields Normalized by Nicotine (mg/mg) |           | % Diff vs CC     |
|----------------------------------------|--------------------------------------------------------|-----------|------------------|
|                                        | AEROSOL<br>MAX                                         | CC        |                  |
| <b># of puffs</b>                      | 88                                                     | NA        | NA               |
| <b>pH</b>                              | 6.53                                                   | NA        | NA               |
| <b>Primary Constituents</b>            |                                                        |           |                  |
| <b>Nicotine</b>                        | 1.00E+00                                               | 1.00E+00  | NA               |
| <b>Glycerol</b>                        | 2.68E+01                                               | 1.20E+00  | ↑ 2143.99%       |
| <b>Propylene Glycol</b>                | 3.76E+01                                               | 1.36E-02  | ↑ 276111.72%     |
| <b>Water</b>                           | 4.29E+00                                               | 7.94E+00  | ↓ 45.95%         |
| <b>Menthol</b>                         | 7.21E-01                                               | ~4.76E-06 | ↑ ≥ 15145814.61% |
| <b>Diethylene Glycol</b>               | ~ 4.67E-03                                             | ~9.90E-04 | NC               |
| <b>Ethylene Glycol</b>                 | ~ 4.97E-03                                             | 1.73E-02  | ↓ ≥ 71.34%       |
| <b>Carbonyls &amp; Glycidol</b>        |                                                        |           |                  |
| <b>Acetaldehyde</b>                    | 2.23E-04                                               | 8.19E-01  | ↓ 99.97%         |
| <b>Acrolein</b>                        | 2.20E-04                                               | 8.12E-02  | ↓ 99.73%         |
| <b>Diacetyl</b>                        | ~ 4.28E-05                                             | 1.69E-01  | ↓ ≥ 99.97%       |
| <b>Formaldehyde</b>                    | 1.04E-03                                               | 5.47E-02  | ↓ 98.10%         |
| <b>Glycidol</b>                        | 2.80E-04                                               | 1.01E-03  | ↓ 72.35%         |
| <b>Acetyl Propionyl</b>                | ~ 4.96E-06                                             | 4.62E-02  | ↓ ≥ 99.99%       |
| <b>Butyraldehyde</b>                   | ~ 8.46E-06                                             | 4.23E-02  | ↓ ≥ 99.98%       |
| <b>Crotonaldehyde</b>                  | ~ 1.01E-05                                             | 2.89E-02  | ↓ ≥ 99.97%       |
| <b>Furfural</b>                        | ~ 8.32E-06                                             | 1.49E-02  | ↓ ≥ 99.94%       |
| <b>Nicotine Degradants &amp; TSNAs</b> |                                                        |           |                  |

|                              |            |           |            |
|------------------------------|------------|-----------|------------|
| <b>β-Nicotyrine</b>          | 2.09E-04   | 3.50E-03  | ↓ 94.04%   |
| <b>Cotinine</b>              | 6.08E-05   | 7.09E-03  | ↓ 99.14%   |
| <b>Myosmine</b>              | 1.58E-04   | 6.55E-03  | ↓ 97.59%   |
| <b>Nicotine N Oxide</b>      | 6.36E-05   | ~3.26E-04 | NC         |
| <b>Nornicotine</b>           | 7.68E-04   | 1.09E-02  | ↓ 92.99%   |
| <b>Anabasine</b>             | ~ 2.98E-06 | 5.10E-04  | ↓ ≥ 99.42% |
| <b>Anatabine</b>             | ~ 2.97E-06 | 3.08E-03  | ↓ ≥ 99.90% |
| <b>NNK</b>                   | ~ 7.64E-07 | 9.86E-05  | ↓ ≥ 99.23% |
| <b>NNN</b>                   | ~ 9.18E-08 | 1.12E-04  | ↓ ≥ 99.92% |
| <b>Metals</b>                |            |           |            |
| <b>Arsenic</b>               | ~ 2.80E-07 | NA        | NA         |
| <b>Beryllium</b>             | ~ 6.16E-08 | NA        | NA         |
| <b>Cadmium</b>               | ~ 2.80E-08 | 4.01E-05  | ↓ ≥ 99.93% |
| <b>Chromium</b>              | ~ 1.67E-06 | ~3.95E-07 | NC         |
| <b>Cobalt</b>                | ~ 1.40E-08 | NA        | NA         |
| <b>Copper</b>                | ~ 7.00E-07 | 1.23E-05  | ↓ ≥ 94.30% |
| <b>Gold</b>                  | ~ 4.72E-06 | NA        | NA         |
| <b>Iron</b>                  | 1.23E-05   | NA        | NA         |
| <b>Lead</b>                  | ~ 7.00E-08 | 1.79E-05  | ↓ ≥ 99.61% |
| <b>Nickel</b>                | ~ 1.40E-07 | ~7.89E-07 | NC         |
| <b>Selenium</b>              | ~ 6.69E-07 | NA        | NA         |
| <b>Silver</b>                | ~ 1.66E-07 | NA        | NA         |
| <b>Tin</b>                   | ~ 1.68E-06 | NA        | NA         |
| <b>Zinc</b>                  | ~ 4.20E-06 | NA        | NA         |
| <b>Organic Acids</b>         |            |           |            |
| <b>Benzoic Acid</b>          | 7.34E-01   | NA        | NA         |
| <b>Propionic Acid</b>        | ~ 1.06E-03 | NA        | NA         |
| <b>VOCs</b>                  |            |           |            |
| <b>1,3-Butadiene</b>         | ~ 1.53E-06 | NA        | NA         |
| <b>Acrylonitrile</b>         | ~ 9.99E-07 | 1.27E-02  | ↓ ≥ 99.99% |
| <b>Benzene</b>               | ~ 1.75E-06 | 4.64E-02  | ↓ ≥ 99.99% |
| <b>Isoprene</b>              | ~ 2.35E-06 | NA        | NA         |
| <b>Propylene Oxide</b>       | ~ 4.05E-06 | 9.00E-04  | ↓ ≥ 99.55% |
| <b>Toluene</b>               | ~ 1.24E-05 | 7.91E-02  | ↓ ≥ 99.98% |
| <b>Esters &amp; Alcohols</b> |            |           |            |
| <b>1-Butanol</b>             | ~ 4.50E-05 | NA        | NA         |
| <b>Benzyl Acetate</b>        | ~ 6.98E-05 | NA        | NA         |
| <b>Ethyl Acetate</b>         | 6.60E-03   | NA        | NA         |
| <b>Ethyl Acetoacetate</b>    | ~ 5.71E-05 | NA        | NA         |
| <b>Isoamyl Acetate</b>       | ~ 4.87E-05 | NA        | NA         |

|                                                       |            |    |              |
|-------------------------------------------------------|------------|----|--------------|
| Isobutyl Acetate                                      | ~ 4.82E-05 | NA | NA           |
| Methyl Acetate                                        | ~ 5.19E-05 | NA | NA           |
| Average Difference                                    |            |    | ↑ 531779.57% |
| Average Difference without PG, VG, Water, and Menthol |            |    | ↓ 96.68%     |

### 1.5 Polar Menthol 18 mg/mL Non-Intense Percent Difference to Combustible Cigarettes

| Parameter/<br>Constituent               | Aerosol or Smoke Yields Normalized by Nicotine (mg/mg) |           | % Diff vs CC    |
|-----------------------------------------|--------------------------------------------------------|-----------|-----------------|
|                                         | AEROSOL<br>MAX                                         | CC        |                 |
| # of puffs                              | 132                                                    | NA        | NA              |
| pH                                      | 6.55                                                   | NA        | NA              |
| <b>Primary Constituents</b>             |                                                        |           |                 |
| Nicotine                                | 1.00E+00                                               | 1.00E+00  | NA              |
| Glycerol                                | 2.72E+01                                               | 8.95E-01  | ↑ 2943.60%      |
| Propylene Glycol                        | 4.50E+01                                               | 4.21E-03  | ↑ 1067675.68%   |
| Water                                   | 4.92E+00                                               | 4.21E+00  | ↑ 16.79%        |
| Menthol                                 | 7.88E-01                                               | ~1.32E-05 | ↑ ≥ 5991318.81% |
| Diethylene Glycol                       | ~ 5.53E-03                                             | ~1.42E-03 | NC              |
| Ethylene Glycol                         | ~ 5.92E-03                                             | 9.96E-03  | ↓ ≥ 40.53%      |
| <b>Carbonyls &amp; Glycidol</b>         |                                                        |           |                 |
| Acetaldehyde                            | 2.90E-04                                               | 7.24E-01  | ↓ 99.96%        |
| Acrolein                                | 1.28E-04                                               | 5.96E-02  | ↓ 99.78%        |
| Diacetyl                                | ~ 3.87E-06                                             | 1.64E-01  | ↓ ≥ 99.99%      |
| Formaldehyde                            | 8.77E-04                                               | 3.74E-02  | ↓ 97.66%        |
| Glycidol                                | 1.64E-04                                               | 1.04E-03  | ↓ 84.13%        |
| Acetyl Propionyl                        | ~ 3.72E-06                                             | 4.21E-02  | ↓ ≥ 99.99%      |
| Butyraldehyde                           | ~ 3.82E-06                                             | 3.33E-02  | ↓ ≥ 99.99%      |
| Crotonaldehyde                          | ~ 5.96E-06                                             | 1.53E-02  | ↓ ≥ 99.96%      |
| Furfural                                | ~ 6.10E-06                                             | 1.84E-02  | ↓ ≥ 99.97%      |
| <b>Nicotine Degradants &amp; TSNA's</b> |                                                        |           |                 |
| β-Nicotyrine                            | 3.08E-04                                               | 1.07E-02  | ↓ 97.11%        |
| Cotinine                                | 1.57E-04                                               | 6.96E-03  | ↓ 97.74%        |
| Myosmine                                | 4.00E-04                                               | NA        | NA              |
| Nicotine N Oxide                        | 1.17E-04                                               | ~5.37E-04 | NC              |
| Nornicotine                             | 9.36E-04                                               | 9.50E-03  | ↓ 90.15%        |
| Anabasine                               | ~ 2.99E-06                                             | 8.33E-04  | ↓ ≥ 99.64%      |
| Anatabine                               | ~ 3.27E-05                                             | 6.00E-03  | ↓ ≥ 99.45%      |
| NNK                                     | ~ 8.58E-07                                             | 9.85E-05  | ↓ ≥ 99.13%      |
| NNN                                     | ~ 1.03E-07                                             | 1.18E-04  | ↓ ≥ 99.91%      |
| <b>Metals</b>                           |                                                        |           |                 |



|                                                       |            |           |              |
|-------------------------------------------------------|------------|-----------|--------------|
| <b>Arsenic</b>                                        | ~ 1.81E-06 | NA        | NA           |
| <b>Beryllium</b>                                      | ~ 7.23E-08 | NA        | NA           |
| <b>Cadmium</b>                                        | ~ 3.29E-08 | 3.35E-05  | ↓ ≥ 99.90%   |
| <b>Chromium</b>                                       | ~ 1.87E-06 | ~6.27E-07 | NC           |
| <b>Cobalt</b>                                         | ~ 1.64E-08 | NA        | NA           |
| <b>Copper</b>                                         | ~ 3.29E-06 | 1.64E-05  | ↓ ≥ 79.90%   |
| <b>Gold</b>                                           | ~ 5.31E-06 | NA        | NA           |
| <b>Iron</b>                                           | ~ 9.36E-06 | NA        | NA           |
| <b>Lead</b>                                           | ~ 8.22E-08 | ~4.18E-07 | NC           |
| <b>Nickel</b>                                         | ~ 4.53E-07 | ~9.64E-07 | NC           |
| <b>Selenium</b>                                       | 1.21E-06   | NA        | NA           |
| <b>Silver</b>                                         | ~ 3.29E-08 | NA        | NA           |
| <b>Tin</b>                                            | ~ 3.29E-07 | NA        | NA           |
| <b>Zinc</b>                                           | ~ 1.56E-05 | NA        | NA           |
| <b>Organic Acids</b>                                  |            |           |              |
| <b>Benzoic Acid</b>                                   | 5.81E-01   | NA        | NA           |
| <b>Propionic Acid</b>                                 | ~ 1.33E-03 | NA        | NA           |
| <b>VOCs</b>                                           |            |           |              |
| <b>1,3-Butadiene</b>                                  | ~ 1.71E-06 | NA        | NA           |
| <b>Acrylonitrile</b>                                  | ~ 1.12E-06 | 9.71E-03  | ↓ ≥ 99.99%   |
| <b>Benzene</b>                                        | ~ 1.97E-06 | 4.58E-02  | ↓ ≥ 99.99%   |
| <b>Isoprene</b>                                       | ~ 2.64E-06 | NA        | NA           |
| <b>Propylene Oxide</b>                                | ~ 4.54E-06 | 8.44E-01  | ↓ ≥ 99.99%   |
| <b>Toluene</b>                                        | ~ 2.89E-06 | 7.35E-02  | ↓ ≥ 99.99%   |
| <b>Esters &amp; Alcohols</b>                          |            |           |              |
| <b>1-Butanol</b>                                      | ~ 5.06E-05 | NA        | NA           |
| <b>Benzyl Acetate</b>                                 | ~ 7.84E-05 | NA        | NA           |
| <b>Ethyl Acetate</b>                                  | ~ 9.87E-04 | NA        | NA           |
| <b>Ethyl Acetoacetate</b>                             | ~ 6.41E-05 | NA        | NA           |
| <b>Isoamyl Acetate</b>                                | ~ 5.47E-05 | NA        | NA           |
| <b>Isobutyl Acetate</b>                               | ~ 5.42E-05 | NA        | NA           |
| <b>Methyl Acetate</b>                                 | ~ 5.82E-05 | NA        | NA           |
| Average Difference                                    |            |           | ↑ 261472.96% |
| Average Difference without PG, VG, Water, and Menthol |            |           | ↓ 94.99%     |

## 1.6 Polar Menthol 18 mg/mL Intense Percent Difference to Combustible Cigarettes

| Parameter/<br>Constituent | Aerosol or Smoke Yields Normalized by Nicotine (mg/mg) |    | % Diff vs CC |
|---------------------------|--------------------------------------------------------|----|--------------|
|                           | AEROSOL<br>MAX                                         | CC |              |
| <b># of puffs</b>         | 81                                                     | NA | NA           |
| <b>pH</b>                 | 6.57                                                   | NA | NA           |

| Primary Constituents        |            |           |                  |
|-----------------------------|------------|-----------|------------------|
| Nicotine                    | 1.00E+00   | 1.00E+00  | NA               |
| Glycerol                    | 2.74E+01   | 1.20E+00  | ↑ 2187.99%       |
| Propylene Glycol            | 4.04E+01   | 1.36E-02  | ↑ 296295.19%     |
| Water                       | 4.21E+00   | 7.94E+00  | ↓ 46.98%         |
| Menthol                     | 7.70E-01   | ~4.76E-06 | ↑ ≥ 16168585.56% |
| Diethylene Glycol           | ~ 4.71E-03 | ~9.90E-04 | NC               |
| Ethylene Glycol             | ~ 5.02E-03 | 1.73E-02  | ↓ ≥ 71.04%       |
| Carbonyls & Glycidol        |            |           |                  |
| Acetaldehyde                | 3.14E-04   | 8.19E-01  | ↓ 99.96%         |
| Acrolein                    | 2.79E-04   | 8.12E-02  | ↓ 99.66%         |
| Diacetyl                    | ~ 4.33E-05 | 1.69E-01  | ↓ ≥ 99.97%       |
| Formaldehyde                | 8.65E-04   | 5.47E-02  | ↓ 98.42%         |
| Glycidol                    | 2.06E-04   | 1.01E-03  | ↓ 79.64%         |
| Acetyl Propionyl            | ~ 5.03E-06 | 4.62E-02  | ↓ ≥ 99.99%       |
| Butyraldehyde               | ~ 8.57E-06 | 4.23E-02  | ↓ ≥ 99.98%       |
| Crotonaldehyde              | ~ 1.02E-05 | 2.89E-02  | ↓ ≥ 99.96%       |
| Furfural                    | ~ 8.43E-06 | 1.49E-02  | ↓ ≥ 99.94%       |
| Nicotine Degradants & TSNAs |            |           |                  |
| β-Nicotyrine                | 3.38E-04   | 3.50E-03  | ↓ 90.35%         |
| Cotinine                    | 1.15E-04   | 7.09E-03  | ↓ 98.37%         |
| Myosmine                    | 3.28E-04   | 6.55E-03  | ↓ 94.99%         |
| Nicotine N Oxide            | ~ 4.01E-05 | ~3.26E-04 | NC               |
| Nornicotine                 | 7.08E-04   | 1.09E-02  | ↓ 93.54%         |
| Anabasine                   | ~ 2.98E-05 | 5.10E-04  | ↓ ≥ 94.15%       |
| Anatabine                   | ~ 3.31E-05 | 3.08E-03  | ↓ ≥ 98.93%       |
| NNK                         | ~ 7.71E-07 | 9.86E-05  | ↓ ≥ 99.22%       |
| NNN                         | ~ 9.26E-08 | 1.12E-04  | ↓ ≥ 99.92%       |
| Metals                      |            |           |                  |
| Arsenic                     | ~ 1.71E-06 | NA        | NA               |
| Beryllium                   | ~ 6.26E-08 | NA        | NA               |
| Cadmium                     | ~ 2.85E-08 | 4.01E-05  | ↓ ≥ 99.93%       |
| Chromium                    | ~ 1.68E-06 | ~3.95E-07 | NC               |
| Cobalt                      | ~ 1.42E-08 | NA        | NA               |
| Copper                      | ~ 7.12E-07 | 1.23E-05  | ↓ ≥ 94.20%       |
| Gold                        | ~ 4.77E-06 | NA        | NA               |
| Iron                        | ~ 8.42E-06 | NA        | NA               |
| Lead                        | ~ 7.12E-08 | 1.79E-05  | ↓ ≥ 99.60%       |
| Nickel                      | ~ 4.23E-07 | ~7.89E-07 | NC               |

|                                                       |            |          |              |
|-------------------------------------------------------|------------|----------|--------------|
| <b>Selenium</b>                                       | 1.40E-06   | NA       | NA           |
| <b>Silver</b>                                         | ~ 1.69E-07 | NA       | NA           |
| <b>Tin</b>                                            | ~ 1.71E-06 | NA       | NA           |
| <b>Zinc</b>                                           | ~ 1.42E-05 | NA       | NA           |
| <b>Organic Acids</b>                                  |            |          |              |
| <b>Benzoic Acid</b>                                   | 7.22E-01   | NA       | NA           |
| <b>Propionic Acid</b>                                 | ~ 1.76E-03 | NA       | NA           |
| <b>VOCs</b>                                           |            |          |              |
| <b>1,3-Butadiene</b>                                  | ~ 1.54E-06 | NA       | NA           |
| <b>Acrylonitrile</b>                                  | ~ 1.01E-06 | 1.27E-02 | ↓ ≥ 99.99%   |
| <b>Benzene</b>                                        | ~ 1.77E-06 | 4.64E-02 | ↓ ≥ 99.99%   |
| <b>Isoprene</b>                                       | ~ 2.37E-06 | NA       | NA           |
| <b>Propylene Oxide</b>                                | ~ 4.08E-06 | 9.00E-04 | ↓ ≥ 99.55%   |
| <b>Toluene</b>                                        | ~ 2.60E-06 | 7.91E-02 | ↓ ≥ 99.99%   |
| <b>Esters &amp; Alcohols</b>                          |            |          |              |
| <b>1-Butanol</b>                                      | ~ 4.54E-05 | NA       | NA           |
| <b>Benzyl Acetate</b>                                 | ~ 7.05E-05 | NA       | NA           |
| <b>Ethyl Acetate</b>                                  | ~ 8.88E-04 | NA       | NA           |
| <b>Ethyl Acetoacetate</b>                             | ~ 5.76E-05 | NA       | NA           |
| <b>Isoamyl Acetate</b>                                | ~ 4.92E-05 | NA       | NA           |
| <b>Isobutyl Acetate</b>                               | ~ 4.87E-05 | NA       | NA           |
| <b>Methyl Acetate</b>                                 | ~ 5.24E-05 | NA       | NA           |
| Average Difference                                    |            |          | ↑ 567745.19% |
| Average Difference without PG, VG, Water, and Menthol |            |          | ↓ 96.45%     |

## 1.7 Autumn Tobacco 18 mg/mL Non-Intense Percent Difference to Combustible Cigarettes

| Parameter/<br>Constituent   | Aerosol or Smoke Yields Normalized by Nicotine (mg/mg) |           | % Diff vs CC |
|-----------------------------|--------------------------------------------------------|-----------|--------------|
|                             | AEROSOL<br>MAX                                         | CC        |              |
| <b># of puffs</b>           | 128                                                    | NA        | NA           |
| <b>pH</b>                   | 6.41                                                   | NA        | NA           |
| <b>Primary Constituents</b> |                                                        |           |              |
| <b>Nicotine</b>             | 1.00E+00                                               | 1.00E+00  | NA           |
| <b>Glycerol</b>             | 2.59E+01                                               | 8.95E-01  | ↑ 2799.86%   |
| <b>Propylene Glycol</b>     | 3.40E+01                                               | 4.21E-03  | ↑ 807778.37% |
| <b>Water</b>                | 6.24E+00                                               | 4.21E+00  | ↑ 48.28%     |
| <b>Menthol</b>              | ~ 2.01E-03                                             | ~1.32E-05 | NC           |
| <b>Diethylene Glycol</b>    | ~ 1.84E-03                                             | ~1.42E-03 | NC           |
| <b>Ethylene Glycol</b>      | ~ 1.28E-03                                             | 9.96E-03  | ↓ ≥ 87.11%   |

| Carbonyls & Glycidol       |            |           |            |
|----------------------------|------------|-----------|------------|
| Acetaldehyde               | 1.60E-04   | 7.24E-01  | ↓ 99.98%   |
| Acrolein                   | 7.06E-05   | 5.96E-02  | ↓ 99.88%   |
| Diacetyl                   | ~ 3.73E-05 | 1.64E-01  | ↓ ≥ 99.98% |
| Formaldehyde               | 5.57E-04   | 3.74E-02  | ↓ 98.51%   |
| Glycidol                   | 1.61E-04   | 1.04E-03  | ↓ 84.43%   |
| Acetyl Propionyl           | ~ 4.29E-06 | 4.21E-02  | ↓ ≥ 99.99% |
| Butyraldehyde              | ~ 3.52E-05 | 3.33E-02  | ↓ ≥ 99.89% |
| Crotonaldehyde             | ~ 5.51E-06 | 1.53E-02  | ↓ ≥ 99.96% |
| Furfural                   | ~ 5.88E-06 | 1.84E-02  | ↓ ≥ 99.97% |
| Nicotine Degradants & TSNA |            |           |            |
| β-Nicotyrine               | 1.17E-04   | 1.07E-02  | ↓ 98.90%   |
| Cotinine                   | 1.89E-04   | 6.96E-03  | ↓ 97.29%   |
| Myosmine                   | 1.88E-04   | NA        | NA         |
| Nicotine N Oxide           | 2.51E-04   | ~5.37E-04 | NC         |
| Nornicotine                | 5.91E-04   | 9.50E-03  | ↓ 93.78%   |
| Anabasine                  | ~ 3.69E-06 | 8.33E-04  | ↓ ≥ 99.56% |
| Anatabine                  | ~ 2.93E-06 | 6.00E-03  | ↓ ≥ 99.95% |
| NNK                        | ~ 9.18E-08 | 9.85E-05  | ↓ ≥ 99.91% |
| NNN                        | ~ 2.47E-08 | 1.18E-04  | ↓ ≥ 99.98% |
| Metals                     |            |           |            |
| Arsenic                    | ~ 1.82E-06 | NA        | NA         |
| Beryllium                  | ~ 6.68E-08 | NA        | NA         |
| Cadmium                    | ~ 3.04E-08 | 3.35E-05  | ↓ ≥ 99.91% |
| Chromium                   | ~ 1.80E-06 | ~6.27E-07 | NC         |
| Cobalt                     | ~ 1.52E-08 | NA        | NA         |
| Copper                     | ~ 7.59E-07 | 1.64E-05  | ↓ ≥ 95.36% |
| Gold                       | ~ 5.16E-06 | NA        | NA         |
| Iron                       | ~ 3.04E-06 | NA        | NA         |
| Lead                       | ~ 7.59E-08 | ~4.18E-07 | NC         |
| Nickel                     | ~ 1.52E-07 | ~9.64E-07 | NC         |
| Selenium                   | ~ 7.26E-07 | NA        | NA         |
| Silver                     | ~ 3.04E-08 | NA        | NA         |
| Tin                        | ~ 1.80E-06 | NA        | NA         |
| Zinc                       | ~ 4.56E-06 | NA        | NA         |
| Organic Acids              |            |           |            |
| Benzoic Acid               | 7.08E-01   | NA        | NA         |
| Propionic Acid             | ~ 1.96E-03 | NA        | NA         |
| VOCs                       |            |           |            |

|                                              |            |          |             |
|----------------------------------------------|------------|----------|-------------|
| <b>1,3-butadiene</b>                         | ~ 2.12E-06 | NA       | NA          |
| <b>Acrylonitrile</b>                         | ~ 1.09E-06 | 9.71E-03 | ↓ ≥ 99.99%  |
| <b>Benzene</b>                               | ~ 1.12E-05 | 4.58E-02 | ↓ ≥ 99.98%  |
| <b>Isoprene</b>                              | ~ 2.57E-06 | NA       | NA          |
| <b>Propylene Oxide</b>                       | ~ 6.89E-06 | 8.44E-01 | ↓ ≥ 99.99%  |
| <b>Toluene</b>                               | ~ 1.35E-05 | 7.35E-02 | ↓ ≥ 99.98%  |
| <b>Esters &amp; Alcohols</b>                 |            |          |             |
| <b>1-Butanol</b>                             | ~ 6.54E-04 | NA       | NA          |
| <b>Benzyl Acetate</b>                        | ~ 7.65E-05 | NA       | NA          |
| <b>Ethyl Acetate</b>                         | ~ 6.09E-05 | NA       | NA          |
| <b>Ethyl Acetoacetate</b>                    | ~ 1.19E-04 | NA       | NA          |
| <b>Isoamyl Acetate</b>                       | ~ 6.15E-05 | NA       | NA          |
| <b>Isobutyl Acetate</b>                      | ~ 6.12E-05 | NA       | NA          |
| <b>Methyl Acetate</b>                        | ~ 7.00E-04 | NA       | NA          |
| Average Difference                           |            |          | ↑ 31091.24% |
| Average Difference without PG, VG, and Water |            |          | ↓ 98.01%    |

## 1.8 Autumn Tobacco 18 mg/mL Intense Percent Difference to Combustible Cigarettes

| Parameter/<br>Constituent       | Aerosol or Smoke Yields Normalized by Nicotine (mg/mg) |           | % Diff vs CC |
|---------------------------------|--------------------------------------------------------|-----------|--------------|
|                                 | AEROSOL<br>MAX                                         | CC        |              |
| <b># of puffs</b>               | 80                                                     | NA        | NA           |
| <b>pH</b>                       | 6.43                                                   | NA        | NA           |
| <b>Primary Constituents</b>     |                                                        |           |              |
| <b>Nicotine</b>                 | 1.00E+00                                               | 1.00E+00  | NA           |
| <b>Glycerol</b>                 | 2.62E+01                                               | 1.20E+00  | ↑ 2095.82%   |
| <b>Propylene Glycol</b>         | 3.41E+01                                               | 1.36E-02  | ↑ 249907.01% |
| <b>Water</b>                    | 5.42E+00                                               | 7.94E+00  | ↓ 31.79%     |
| <b>Menthol</b>                  | ~ 4.90E-03                                             | ~4.76E-06 | NC           |
| <b>Diethylene Glycol</b>        | ~ 2.10E-03                                             | ~9.90E-04 | NC           |
| <b>Ethylene Glycol</b>          | ~ 1.47E-03                                             | 1.73E-02  | ↓ ≥ 91.53%   |
| <b>Carbonyls &amp; Glycidol</b> |                                                        |           |              |
| <b>Acetaldehyde</b>             | 1.92E-04                                               | 8.19E-01  | ↓ 99.98%     |
| <b>Acrolein</b>                 | 1.27E-04                                               | 8.12E-02  | ↓ 99.84%     |
| <b>Diacetyl</b>                 | ~ 4.84E-05                                             | 1.69E-01  | ↓ ≥ 99.97%   |
| <b>Formaldehyde</b>             | 6.99E-04                                               | 5.47E-02  | ↓ 98.72%     |
| <b>Glycidol</b>                 | 2.70E-04                                               | 1.01E-03  | ↓ 73.35%     |
| <b>Acetyl Propionyl</b>         | ~ 4.79E-05                                             | 4.62E-02  | ↓ ≥ 99.90%   |
| <b>Butyraldehyde</b>            | ~ 4.58E-06                                             | 4.23E-02  | ↓ ≥ 99.99%   |

|                                       |            |           |            |
|---------------------------------------|------------|-----------|------------|
| <b>Crotonaldehyde</b>                 | ~ 7.12E-06 | 2.89E-02  | ↓ ≥ 99.98% |
| <b>Furfural</b>                       | ~ 7.84E-06 | 1.49E-02  | ↓ ≥ 99.95% |
| <b>Nicotine Degradants &amp; TSNA</b> |            |           |            |
| <b>β-Nicotyrine</b>                   | 1.17E-04   | 3.50E-03  | ↓ 96.65%   |
| <b>Cotinine</b>                       | 2.75E-04   | 7.09E-03  | ↓ 96.12%   |
| <b>Myosmine</b>                       | 2.12E-04   | 6.55E-03  | ↓ 96.76%   |
| <b>Nicotine N Oxide</b>               | 2.92E-04   | ~3.26E-04 | NC         |
| <b>Nornicotine</b>                    | 7.23E-04   | 1.09E-02  | ↓ 93.40%   |
| <b>Anabasine</b>                      | ~ 4.92E-06 | 5.10E-04  | ↓ ≥ 99.04% |
| <b>Anatabine</b>                      | ~ 3.91E-06 | 3.08E-03  | ↓ ≥ 99.87% |
| <b>NNK</b>                            | ~ 1.02E-07 | 9.86E-05  | ↓ ≥ 99.90% |
| <b>NNN</b>                            | ~ 1.11E-07 | 1.12E-04  | ↓ ≥ 99.90% |
| <b>Metals</b>                         |            |           |            |
| <b>Arsenic</b>                        | ~ 1.90E-06 | NA        | NA         |
| <b>Beryllium</b>                      | ~ 7.40E-08 | NA        | NA         |
| <b>Cadmium</b>                        | ~ 3.37E-08 | 4.01E-05  | ↓ ≥ 99.92% |
| <b>Chromium</b>                       | ~ 1.90E-06 | ~3.95E-07 | NC         |
| <b>Cobalt</b>                         | ~ 1.68E-08 | NA        | NA         |
| <b>Copper</b>                         | ~ 8.41E-07 | 1.23E-05  | ↓ ≥ 93.15% |
| <b>Gold</b>                           | ~ 5.72E-06 | NA        | NA         |
| <b>Iron</b>                           | ~ 3.37E-06 | NA        | NA         |
| <b>Lead</b>                           | ~ 8.41E-08 | 1.79E-05  | ↓ ≥ 99.53% |
| <b>Nickel</b>                         | ~ 1.68E-07 | ~7.89E-07 | NC         |
| <b>Selenium</b>                       | ~ 8.04E-07 | NA        | NA         |
| <b>Silver</b>                         | ~ 3.37E-08 | NA        | NA         |
| <b>Tin</b>                            | ~ 2.02E-06 | NA        | NA         |
| <b>Zinc</b>                           | ~ 5.05E-06 | NA        | NA         |
| <b>Organic Acids</b>                  |            |           |            |
| <b>Benzoic Acid</b>                   | 8.34E-01   | NA        | NA         |
| <b>Propionic Acid</b>                 | ~ 2.24E-03 | NA        | NA         |
| <b>VOCs</b>                           |            |           |            |
| <b>1,3-butadiene</b>                  | ~ 1.85E-06 | NA        | NA         |
| <b>Acrylonitrile</b>                  | ~ 1.21E-06 | 1.27E-02  | ↓ ≥ 99.99% |
| <b>Benzene</b>                        | ~ 1.24E-05 | 4.64E-02  | ↓ ≥ 99.97% |
| <b>Isoprene</b>                       | ~ 2.85E-06 | NA        | NA         |
| <b>Propylene Oxide</b>                | ~ 4.90E-06 | 9.00E-04  | ↓ ≥ 99.46% |
| <b>Toluene</b>                        | ~ 1.50E-05 | 7.91E-02  | ↓ ≥ 99.98% |
| <b>Esters &amp; Alcohols</b>          |            |           |            |
| <b>1-Butanol</b>                      | ~ 7.26E-04 | NA        | NA         |

|                                              |            |    |            |
|----------------------------------------------|------------|----|------------|
| <b>Benzyl Acetate</b>                        | ~ 8.47E-05 | NA | NA         |
| <b>Ethyl Acetate</b>                         | ~ 6.75E-05 | NA | NA         |
| <b>Ethyl Acetoacetate</b>                    | ~ 1.31E-04 | NA | NA         |
| <b>Isoamyl Acetate</b>                       | ~ 6.82E-05 | NA | NA         |
| <b>Isobutyl Acetate</b>                      | ~ 6.78E-05 | NA | NA         |
| <b>Methyl Acetate</b>                        | ~ 7.03E-05 | NA | NA         |
| Average Difference                           |            |    | ↑ 8911.94% |
| Average Difference without PG, VG, and Water |            |    | ↓ 97.47%   |

## 1.9 Ruby Menthol 18 mg/mL Non-Intense Percent Difference to Combustible Cigarettes

| Parameter/<br>Constituent              | Aerosol or Smoke Yields Normalized by Nicotine (mg/mg) |           | % Diff vs CC    |
|----------------------------------------|--------------------------------------------------------|-----------|-----------------|
|                                        | AEROSOL<br>MAX                                         | CC        |                 |
| <b># of puffs</b>                      | 135                                                    | NA        | NA              |
| <b>pH</b>                              | 5.90                                                   | NA        | NA              |
| <b>Primary Constituents</b>            |                                                        |           |                 |
| <b>Nicotine</b>                        | 1.00E+00                                               | 1.00E+00  | NA              |
| <b>Glycerol</b>                        | 2.60E+01                                               | 8.95E-01  | ↑ 2802.08%      |
| <b>Propylene Glycol</b>                | 3.50E+01                                               | 4.21E-03  | ↑ 830431.54%    |
| <b>Water</b>                           | 8.20E+00                                               | 4.21E+00  | ↑ 94.74%        |
| <b>Menthol</b>                         | 5.73E-01                                               | ~1.32E-05 | ↑ ≥ 4357200.89% |
| <b>Diethylene Glycol</b>               | ~ 2.02E-03                                             | ~1.42E-03 | NC              |
| <b>Ethylene Glycol</b>                 | ~ 1.41E-03                                             | 9.96E-03  | ↓ ≥ 85.84%      |
| <b>Carbonyls &amp; Glycidol</b>        |                                                        |           |                 |
| <b>Acetaldehyde</b>                    | 2.93E-04                                               | 7.24E-01  | ↓ 99.96%        |
| <b>Acrolein</b>                        | ~ 4.04E-05                                             | 5.96E-02  | ↓ ≥ 99.93%      |
| <b>Diacetyl</b>                        | ~ 3.93E-05                                             | 1.64E-01  | ↓ ≥ 99.98%      |
| <b>Formaldehyde</b>                    | 8.18E-04                                               | 3.74E-02  | ↓ 97.82%        |
| <b>Glycidol</b>                        | 1.84E-04                                               | 1.04E-03  | ↓ 82.21%        |
| <b>Acetyl Propionyl</b>                | ~ 4.71E-06                                             | 4.21E-02  | ↓ ≥ 99.99%      |
| <b>Butyraldehyde</b>                   | ~ 3.78E-06                                             | 3.33E-02  | ↓ ≥ 99.99%      |
| <b>Crotonaldehyde</b>                  | ~ 5.71E-06                                             | 1.53E-02  | ↓ ≥ 99.96%      |
| <b>Furfural</b>                        | ~ 6.46E-06                                             | 1.84E-02  | ↓ ≥ 99.96%      |
| <b>Nicotine Degradants &amp; TSNAs</b> |                                                        |           |                 |
| <b>β-Nicotyrine</b>                    | 2.07E-04                                               | 1.07E-02  | ↓ 98.05%        |
| <b>Cotinine</b>                        | 2.42E-04                                               | 6.96E-03  | ↓ 96.52%        |
| <b>Myosmine</b>                        | 3.01E-04                                               | NA        | NA              |
| <b>Nicotine N Oxide</b>                | 2.56E-04                                               | ~5.37E-04 | NC              |
| <b>Nornicotine</b>                     | 6.68E-04                                               | 9.50E-03  | ↓ 92.97%        |

|                                                       |            |           |              |
|-------------------------------------------------------|------------|-----------|--------------|
| <b>Anabasine</b>                                      | ~ 4.05E-06 | 8.33E-04  | ↓ ≥ 99.51%   |
| <b>Anatabine</b>                                      | ~ 3.22E-06 | 6.00E-03  | ↓ ≥ 99.95%   |
| <b>NNK</b>                                            | ~ 9.52E-08 | 9.85E-05  | ↓ ≥ 99.90%   |
| <b>NNN</b>                                            | 3.53E-07   | 1.18E-04  | ↓ 99.70%     |
| <b>Metals</b>                                         |            |           |              |
| <b>Arsenic</b>                                        | ~ 3.15E-07 | NA        | NA           |
| <b>Beryllium</b>                                      | ~ 6.93E-08 | NA        | NA           |
| <b>Cadmium</b>                                        | ~ 3.15E-08 | 3.35E-05  | ↓ ≥ 99.91%   |
| <b>Chromium</b>                                       | ~ 3.15E-07 | ~6.27E-07 | NC           |
| <b>Cobalt</b>                                         | ~ 1.57E-08 | NA        | NA           |
| <b>Copper</b>                                         | ~ 7.87E-07 | 1.64E-05  | ↓ ≥ 95.19%   |
| <b>Gold</b>                                           | ~ 5.35E-06 | NA        | NA           |
| <b>Iron</b>                                           | ~ 3.15E-06 | NA        | NA           |
| <b>Lead</b>                                           | ~ 7.87E-08 | ~4.18E-07 | NC           |
| <b>Nickel</b>                                         | ~ 1.57E-07 | ~9.64E-07 | NC           |
| <b>Selenium</b>                                       | ~ 7.52E-07 | NA        | NA           |
| <b>Silver</b>                                         | ~ 1.67E-07 | NA        | NA           |
| <b>Tin</b>                                            | ~ 3.15E-07 | NA        | NA           |
| <b>Zinc</b>                                           | ~ 4.72E-06 | NA        | NA           |
| <b>Organic Acids</b>                                  |            |           |              |
| <b>Benzoic Acid</b>                                   | 7.19E-01   | NA        | NA           |
| <b>Propionic Acid</b>                                 | ~ 2.15E-03 | NA        | NA           |
| <b>VOCs</b>                                           |            |           |              |
| <b>1,3-butadiene</b>                                  | ~ 2.20E-06 | NA        | NA           |
| <b>Acrylonitrile</b>                                  | ~ 1.09E-06 | 9.71E-03  | ↓ ≥ 99.99%   |
| <b>Benzene</b>                                        | ~ 1.15E-05 | 4.58E-02  | ↓ ≥ 99.97%   |
| <b>Isoprene</b>                                       | ~ 2.55E-06 | NA        | NA           |
| <b>Propylene Oxide</b>                                | ~ 7.17E-06 | 8.44E-01  | ↓ ≥ 99.99%   |
| <b>Toluene</b>                                        | ~ 1.35E-05 | 7.35E-02  | ↓ ≥ 99.98%   |
| <b>Esters &amp; Alcohols</b>                          |            |           |              |
| <b>1-Butanol</b>                                      | ~ 6.02E-05 | NA        | NA           |
| <b>Benzyl Acetate</b>                                 | ~ 7.92E-05 | NA        | NA           |
| <b>Ethyl Acetate</b>                                  | ~ 6.31E-05 | NA        | NA           |
| <b>Ethyl Acetoacetate</b>                             | ~ 1.23E-04 | NA        | NA           |
| <b>Isoamyl Acetate</b>                                | ~ 6.38E-05 | NA        | NA           |
| <b>Isobutyl Acetate</b>                               | ~ 6.35E-05 | NA        | NA           |
| <b>Methyl Acetate</b>                                 | ~ 7.29E-04 | NA        | NA           |
| Average Difference                                    |            |           | ↑ 192158.59% |
| Average Difference without PG, VG, Water, and Menthol |            |           | ↓ 97.71%     |



### 1.10 Ruby Menthol 18 mg/mL Intense Percent Difference to Combustible Cigarettes

| Parameter/<br>Constituent              | Aerosol or Smoke Yields Normalized by Nicotine (mg/mg) |           | % Diff vs CC     |
|----------------------------------------|--------------------------------------------------------|-----------|------------------|
|                                        | AEROSOL<br>MAX                                         | CC        |                  |
| # of puffs                             | 90                                                     | NA        | NA               |
| pH                                     | 6.09                                                   | NA        | NA               |
| <b>Primary Constituents</b>            |                                                        |           |                  |
| Nicotine                               | 1.00E+00                                               | 1.00E+00  | NA               |
| Glycerol                               | 2.62E+01                                               | 1.20E+00  | ↑ 2092.98%       |
| Propylene Glycol                       | 3.50E+01                                               | 1.36E-02  | ↑ 257107.51%     |
| Water                                  | 6.18E+00                                               | 7.94E+00  | ↓ 22.10%         |
| Menthol                                | 5.58E-01                                               | ~4.76E-06 | ↑ ≥ 11720092.34% |
| Diethylene Glycol                      | ~ 2.09E-03                                             | ~9.90E-04 | NC               |
| Ethylene Glycol                        | ~ 1.46E-03                                             | 1.73E-02  | ↓ ≥ 91.60%       |
| <b>Carbonyls &amp; Glycidol</b>        |                                                        |           |                  |
| Acetaldehyde                           | 3.62E-04                                               | 8.19E-01  | ↓ 99.96%         |
| Acrolein                               | 1.25E-04                                               | 8.12E-02  | ↓ 99.85%         |
| Diacetyl                               | ~ 5.03E-05                                             | 1.69E-01  | ↓ ≥ 99.97%       |
| Formaldehyde                           | 9.31E-04                                               | 5.47E-02  | ↓ 98.30%         |
| Glycidol                               | 3.21E-04                                               | 1.01E-03  | ↓ 68.28%         |
| Acetyl Propionyl                       | ~ 5.67E-06                                             | 4.62E-02  | ↓ ≥ 99.99%       |
| Butyraldehyde                          | ~ 4.55E-06                                             | 4.23E-02  | ↓ ≥ 99.99%       |
| Crotonaldehyde                         | ~ 7.24E-06                                             | 2.89E-02  | ↓ ≥ 99.97%       |
| Furfural                               | ~ 7.78E-06                                             | 1.49E-02  | ↓ ≥ 99.95%       |
| <b>Nicotine Degradants &amp; TSNAs</b> |                                                        |           |                  |
| β-Nicotyrine                           | 2.94E-04                                               | 3.50E-03  | ↓ 91.59%         |
| Cotinine                               | 2.65E-04                                               | 7.09E-03  | ↓ 96.27%         |
| Myosmine                               | 3.21E-04                                               | 6.55E-03  | ↓ 95.09%         |
| Nicotine N Oxide                       | 2.35E-04                                               | ~3.26E-04 | NC               |
| Nornicotine                            | 8.86E-04                                               | 1.09E-02  | ↓ 91.91%         |
| Anabasine                              | ~ 4.88E-06                                             | 5.10E-04  | ↓ ≥ 99.04%       |
| Anatabine                              | ~ 3.88E-06                                             | 3.08E-03  | ↓ ≥ 99.87%       |
| NNK                                    | ~ 1.03E-07                                             | 9.86E-05  | ↓ ≥ 99.90%       |
| NNN                                    | 4.46E-07                                               | 1.12E-04  | ↓ 99.60%         |
| <b>Metals</b>                          |                                                        |           |                  |
| Arsenic                                | ~ 3.42E-07                                             | NA        | NA               |
| Beryllium                              | ~ 7.53E-08                                             | NA        | NA               |
| Cadmium                                | ~ 3.42E-08                                             | 4.01E-05  | ↓ ≥ 99.91%       |
| Chromium                               | ~ 3.42E-07                                             | ~3.95E-07 | NC               |

|                                                       |            |           |              |
|-------------------------------------------------------|------------|-----------|--------------|
| <b>Cobalt</b>                                         | ~ 1.71E-08 | NA        | NA           |
| <b>Copper</b>                                         | ~ 8.56E-07 | 1.23E-05  | ↓ ≥ 93.03%   |
| <b>Gold</b>                                           | ~ 5.82E-06 | NA        | NA           |
| <b>Iron</b>                                           | ~ 3.42E-06 | NA        | NA           |
| <b>Lead</b>                                           | ~ 4.17E-07 | 1.79E-05  | ↓ ≥ 97.68%   |
| <b>Nickel</b>                                         | ~ 1.71E-07 | ~7.89E-07 | NC           |
| <b>Selenium</b>                                       | ~ 8.18E-07 | NA        | NA           |
| <b>Silver</b>                                         | ~ 1.79E-07 | NA        | NA           |
| <b>Tin</b>                                            | ~ 2.00E-06 | NA        | NA           |
| <b>Zinc</b>                                           | ~ 5.13E-06 | NA        | NA           |
| <b>Organic Acids</b>                                  |            |           |              |
| <b>Benzoic Acid</b>                                   | 8.02E-01   | NA        | NA           |
| <b>Propionic Acid</b>                                 | ~ 2.22E-03 | NA        | NA           |
| <b>VOCs</b>                                           |            |           |              |
| <b>1,3-butadiene</b>                                  | ~ 1.88E-06 | NA        | NA           |
| <b>Acrylonitrile</b>                                  | ~ 1.23E-06 | 1.27E-02  | ↓ ≥ 99.99%   |
| <b>Benzene</b>                                        | ~ 1.27E-05 | 4.64E-02  | ↓ ≥ 99.97%   |
| <b>Isoprene</b>                                       | ~ 2.89E-06 | NA        | NA           |
| <b>Propylene Oxide</b>                                | ~ 4.98E-06 | 9.00E-04  | ↓ ≥ 99.45%   |
| <b>Toluene</b>                                        | ~ 1.53E-05 | 7.91E-02  | ↓ ≥ 99.98%   |
| <b>Esters &amp; Alcohols</b>                          |            |           |              |
| <b>1-Butanol</b>                                      | ~ 6.55E-05 | NA        | NA           |
| <b>Benzyl Acetate</b>                                 | ~ 8.62E-05 | NA        | NA           |
| <b>Ethyl Acetate</b>                                  | ~ 6.86E-05 | NA        | NA           |
| <b>Ethyl Acetoacetate</b>                             | ~ 1.34E-04 | NA        | NA           |
| <b>Isoamyl Acetate</b>                                | ~ 6.93E-05 | NA        | NA           |
| <b>Isobutyl Acetate</b>                               | ~ 6.90E-05 | NA        | NA           |
| <b>Methyl Acetate</b>                                 | ~ 8.02E-04 | NA        | NA           |
| Average Difference                                    |            |           | ↑ 412994.81% |
| Average Difference without PG, VG, Water, and Menthol |            |           | ↓ 96.85%     |

### 1.11 Summer Menthol 18 mg/mL Non-Intense Percent Difference to Combustible Cigarettes

| Parameter/<br>Constituent   | Aerosol or Smoke Yields Normalized by Nicotine (mg/mg) |          | % Diff vs CC |
|-----------------------------|--------------------------------------------------------|----------|--------------|
|                             | AEROSOL<br>MAX                                         | CC       |              |
| <b># of puffs</b>           | 138                                                    | NA       | NA           |
| <b>pH</b>                   | 6.46                                                   | NA       | NA           |
| <b>Primary Constituents</b> |                                                        |          |              |
| <b>Nicotine</b>             | 1.00E+00                                               | 1.00E+00 | NA           |

|                                        |            |           |                 |
|----------------------------------------|------------|-----------|-----------------|
| <b>Glycerol</b>                        | 2.57E+01   | 8.95E-01  | ↑ 2777.39%      |
| <b>Propylene Glycol</b>                | 3.34E+01   | 4.21E-03  | ↑ 793277.57%    |
| <b>Water</b>                           | 8.38E+00   | 4.21E+00  | ↑ 99.11%        |
| <b>Menthol</b>                         | 5.65E-01   | ~1.32E-05 | ↑ ≥ 4297635.85% |
| <b>Diethylene Glycol</b>               | ~ 2.09E-03 | ~1.42E-03 | NC              |
| <b>Ethylene Glycol</b>                 | ~ 1.46E-03 | 9.96E-03  | ↓ ≥ 85.35%      |
| <b>Carbonyls &amp; Glycidol</b>        |            |           |                 |
| <b>Acetaldehyde</b>                    | 1.12E-04   | 7.24E-01  | ↓ 99.98%        |
| <b>Acrolein</b>                        | ~ 4.02E-05 | 5.96E-02  | ↓ ≥ 99.93%      |
| <b>Diacetyl</b>                        | ~ 4.06E-05 | 1.64E-01  | ↓ ≥ 99.98%      |
| <b>Formaldehyde</b>                    | 5.38E-04   | 3.74E-02  | ↓ 98.56%        |
| <b>Glycidol</b>                        | 1.17E-04   | 1.04E-03  | ↓ 88.75%        |
| <b>Acetyl Propionyl</b>                | ~ 3.30E-05 | 4.21E-02  | ↓ ≥ 99.92%      |
| <b>Butyraldehyde</b>                   | ~ 3.91E-06 | 3.33E-02  | ↓ ≥ 99.99%      |
| <b>Crotonaldehyde</b>                  | ~ 5.62E-06 | 1.53E-02  | ↓ ≥ 99.96%      |
| <b>Furfural</b>                        | ~ 6.68E-06 | 1.84E-02  | ↓ ≥ 99.96%      |
| <b>Nicotine Degradants &amp; TSNAs</b> |            |           |                 |
| <b>β-Nicotyrine</b>                    | 7.87E-05   | 1.07E-02  | ↓ 99.26%        |
| <b>Cotinine</b>                        | 1.18E-04   | 6.96E-03  | ↓ 98.31%        |
| <b>Myosmine</b>                        | 1.13E-04   | NA        | NA              |
| <b>Nicotine N Oxide</b>                | 1.86E-04   | ~5.37E-04 | NC              |
| <b>Nornicotine</b>                     | 4.54E-04   | 9.50E-03  | ↓ 95.22%        |
| <b>Anabasine</b>                       | ~ 4.19E-06 | 8.33E-04  | ↓ ≥ 99.50%      |
| <b>Anatabine</b>                       | ~ 3.33E-06 | 6.00E-03  | ↓ ≥ 99.94%      |
| <b>NNK</b>                             | ~ 9.37E-08 | 9.85E-05  | ↓ ≥ 99.90%      |
| <b>NNN</b>                             | ~ 2.52E-08 | 1.18E-04  | ↓ ≥ 99.98%      |
| <b>Metals</b>                          |            |           |                 |
| <b>Arsenic</b>                         | ~ 3.16E-07 | NA        | NA              |
| <b>Beryllium</b>                       | ~ 6.95E-08 | NA        | NA              |
| <b>Cadmium</b>                         | ~ 3.16E-08 | 3.35E-05  | ↓ ≥ 99.91%      |
| <b>Chromium</b>                        | ~ 3.16E-07 | ~6.27E-07 | NC              |
| <b>Cobalt</b>                          | ~ 1.58E-08 | NA        | NA              |
| <b>Copper</b>                          | ~ 7.89E-07 | 1.64E-05  | ↓ ≥ 95.17%      |
| <b>Gold</b>                            | ~ 5.37E-06 | NA        | NA              |
| <b>Iron</b>                            | ~ 3.16E-06 | NA        | NA              |
| <b>Lead</b>                            | ~ 7.89E-08 | ~4.18E-07 | NC              |
| <b>Nickel</b>                          | ~ 1.58E-07 | ~9.64E-07 | NC              |
| <b>Selenium</b>                        | ~ 7.41E-07 | NA        | NA              |
| <b>Silver</b>                          | ~ 1.61E-07 | NA        | NA              |
| <b>Tin</b>                             | ~ 3.16E-07 | NA        | NA              |

|                                                       |            |          |              |
|-------------------------------------------------------|------------|----------|--------------|
| <b>Zinc</b>                                           | ~ 1.49E-05 | NA       | NA           |
| <b>Organic Acids</b>                                  |            |          |              |
| <b>Benzoic Acid</b>                                   | 6.87E-01   | NA       | NA           |
| <b>Propionic Acid</b>                                 | ~ 2.23E-03 | NA       | NA           |
| <b>VOCs</b>                                           |            |          |              |
| <b>1,3-butadiene</b>                                  | ~ 2.17E-06 | NA       | NA           |
| <b>Acrylonitrile</b>                                  | ~ 1.07E-06 | 9.71E-03 | ↓ ≥ 99.99%   |
| <b>Benzene</b>                                        | ~ 1.13E-05 | 4.58E-02 | ↓ ≥ 99.98%   |
| <b>Isoprene</b>                                       | ~ 2.52E-06 | NA       | NA           |
| <b>Propylene Oxide</b>                                | ~ 7.06E-06 | 8.44E-01 | ↓ ≥ 99.99%   |
| <b>Toluene</b>                                        | ~ 1.33E-05 | 7.35E-02 | ↓ ≥ 99.98%   |
| <b>Esters &amp; Alcohols</b>                          |            |          |              |
| <b>1-Butanol</b>                                      | ~ 5.93E-05 | NA       | NA           |
| <b>Benzyl Acetate</b>                                 | ~ 7.80E-05 | NA       | NA           |
| <b>Ethyl Acetate</b>                                  | 1.02E-02   | NA       | NA           |
| <b>Ethyl Acetoacetate</b>                             | ~ 1.21E-04 | NA       | NA           |
| <b>Isoamyl Acetate</b>                                | ~ 6.28E-05 | NA       | NA           |
| <b>Isobutyl Acetate</b>                               | ~ 6.25E-05 | NA       | NA           |
| <b>Methyl Acetate</b>                                 | ~ 7.18E-04 | NA       | NA           |
| Average Difference                                    |            |          | ↑ 188575.20% |
| Average Difference without PG, VG, Water, and Menthol |            |          | ↓ 98.24%     |

### 1.12 Summer Menthol 18 mg/mL Intense Percent Difference to Combustible Cigarettes

| Parameter/<br>Constituent       | Aerosol or Smoke Yields Normalized by Nicotine (mg/mg) |           | % Diff vs CC     |
|---------------------------------|--------------------------------------------------------|-----------|------------------|
|                                 | AEROSOL<br>MAX                                         | CC        |                  |
| <b># of puffs</b>               | 86                                                     | NA        | NA               |
| <b>pH</b>                       | 6.51                                                   | NA        | NA               |
| <b>Primary Constituents</b>     |                                                        |           |                  |
| <b>Nicotine</b>                 | 1.00E+00                                               | 1.00E+00  | NA               |
| <b>Glycerol</b>                 | 2.59E+01                                               | 1.20E+00  | ↑ 2062.53%       |
| <b>Propylene Glycol</b>         | 3.36E+01                                               | 1.36E-02  | ↑ 246305.78%     |
| <b>Water</b>                    | 6.47E+00                                               | 7.94E+00  | ↓ 18.53%         |
| <b>Menthol</b>                  | 5.60E-01                                               | ~4.76E-06 | ↑ ≥ 11751564.85% |
| <b>Diethylene Glycol</b>        | ~ 2.19E-03                                             | ~9.90E-04 | NC               |
| <b>Ethylene Glycol</b>          | ~ 1.52E-03                                             | 1.73E-02  | ↓ ≥ 91.20%       |
| <b>Carbonyls &amp; Glycidol</b> |                                                        |           |                  |
| <b>Acetaldehyde</b>             | 1.20E-04                                               | 8.19E-01  | ↓ 99.99%         |
| <b>Acrolein</b>                 | 1.24E-04                                               | 8.12E-02  | ↓ 99.85%         |

|                                       |            |           |            |
|---------------------------------------|------------|-----------|------------|
| <b>Diacetyl</b>                       | ~ 4.95E-05 | 1.69E-01  | ↓ ≥ 99.97% |
| <b>Formaldehyde</b>                   | 6.56E-04   | 5.47E-02  | ↓ 98.80%   |
| <b>Glycidol</b>                       | 2.62E-04   | 1.01E-03  | ↓ 74.15%   |
| <b>Acetyl Propionyl</b>               | ~ 5.94E-06 | 4.62E-02  | ↓ ≥ 99.99% |
| <b>Butyraldehyde</b>                  | ~ 4.76E-06 | 4.23E-02  | ↓ ≥ 99.99% |
| <b>Crotonaldehyde</b>                 | ~ 6.31E-06 | 2.89E-02  | ↓ ≥ 99.98% |
| <b>Furfural</b>                       | ~ 8.15E-06 | 1.49E-02  | ↓ ≥ 99.95% |
| <b>Nicotine Degradants &amp; TSNA</b> |            |           |            |
| <b>β-Nicotyrine</b>                   | 7.81E-05   | 3.50E-03  | ↓ 97.77%   |
| <b>Cotinine</b>                       | 1.23E-04   | 7.09E-03  | ↓ 98.26%   |
| <b>Myosmine</b>                       | 1.08E-04   | 6.55E-03  | ↓ 98.35%   |
| <b>Nicotine N Oxide</b>               | 1.72E-04   | ~3.26E-04 | NC         |
| <b>Nornicotine</b>                    | 4.49E-04   | 1.09E-02  | ↓ 95.90%   |
| <b>Anabasine</b>                      | ~ 5.11E-06 | 5.10E-04  | ↓ ≥ 99.00% |
| <b>Anatabine</b>                      | ~ 4.06E-06 | 3.08E-03  | ↓ ≥ 99.87% |
| <b>NNK</b>                            | ~ 9.03E-08 | 9.86E-05  | ↓ ≥ 99.91% |
| <b>NNN</b>                            | ~ 2.43E-08 | 1.12E-04  | ↓ ≥ 99.98% |
| <b>Metals</b>                         |            |           |            |
| <b>Arsenic</b>                        | ~ 3.30E-07 | NA        | NA         |
| <b>Beryllium</b>                      | ~ 7.26E-08 | NA        | NA         |
| <b>Cadmium</b>                        | ~ 3.30E-08 | 4.01E-05  | ↓ ≥ 99.92% |
| <b>Chromium</b>                       | ~ 3.30E-07 | ~3.95E-07 | NC         |
| <b>Cobalt</b>                         | ~ 1.65E-08 | NA        | NA         |
| <b>Copper</b>                         | ~ 8.25E-07 | 1.23E-05  | ↓ ≥ 93.28% |
| <b>Gold</b>                           | ~ 5.61E-06 | NA        | NA         |
| <b>Iron</b>                           | ~ 3.30E-06 | NA        | NA         |
| <b>Lead</b>                           | ~ 8.25E-08 | 1.79E-05  | ↓ ≥ 99.54% |
| <b>Nickel</b>                         | ~ 1.65E-07 | ~7.89E-07 | NC         |
| <b>Selenium</b>                       | ~ 7.89E-07 | NA        | NA         |
| <b>Silver</b>                         | ~ 1.72E-07 | NA        | NA         |
| <b>Tin</b>                            | ~ 3.30E-07 | NA        | NA         |
| <b>Zinc</b>                           | ~ 4.95E-06 | NA        | NA         |
| <b>Organic Acids</b>                  |            |           |            |
| <b>Benzoic Acid</b>                   | 7.84E-01   | NA        | NA         |
| <b>Propionic Acid</b>                 | ~ 2.33E-03 | NA        | NA         |
| <b>VOCs</b>                           |            |           |            |
| <b>1,3-butadiene</b>                  | ~ 1.64E-06 | NA        | NA         |
| <b>Acrylonitrile</b>                  | ~ 1.07E-06 | 1.27E-02  | ↓ ≥ 99.99% |
| <b>Benzene</b>                        | ~ 1.11E-05 | 4.64E-02  | ↓ ≥ 99.98% |
| <b>Isoprene</b>                       | ~ 2.52E-06 | NA        | NA         |

## Supplementary Material

|                                                       |            |          |              |
|-------------------------------------------------------|------------|----------|--------------|
| <b>Propylene Oxide</b>                                | ~ 4.35E-06 | 9.00E-04 | ↓ ≥ 99.52%   |
| <b>Toluene</b>                                        | ~ 1.34E-05 | 7.91E-02 | ↓ ≥ 99.98%   |
| <b>Esters &amp; Alcohols</b>                          |            |          |              |
| <b>1-Butanol</b>                                      | ~ 5.71E-05 | NA       | NA           |
| <b>Benzyl Acetate</b>                                 | ~ 7.52E-05 | NA       | NA           |
| <b>Ethyl Acetate</b>                                  | 1.07E-02   | NA       | NA           |
| <b>Ethyl Acetoacetate</b>                             | ~ 1.17E-04 | NA       | NA           |
| <b>Isoamyl Acetate</b>                                | ~ 6.05E-05 | NA       | NA           |
| <b>Isobutyl Acetate</b>                               | ~ 6.02E-05 | NA       | NA           |
| <b>Methyl Acetate</b>                                 | ~ 7.14E-04 | NA       | NA           |
| Average Difference                                    |            |          | ↑ 413705.85% |
| Average Difference without PG, VG, Water, and Menthol |            |          | ↓ 97.80%     |

### 1.13 Average Non-Intense and Intense Percent Difference to Combustible Cigarettes

| Parameter/<br>Constituent              | Aerosol or Smoke Yields Normalized by Nicotine (mg/mg) |                                                    |                                              |                                                |
|----------------------------------------|--------------------------------------------------------|----------------------------------------------------|----------------------------------------------|------------------------------------------------|
|                                        | MAX Non-Intense Average<br>% Difference vs CC          | Range of Non-Intense % Difference vs<br>CC Results | MAX Intense<br>Average %<br>Difference vs CC | Range of Intense % Difference vs CC<br>Results |
| # of puffs                             | NA                                                     | NA                                                 | NA                                           |                                                |
| pH                                     | NA                                                     | NA                                                 | NA                                           |                                                |
| <b>Primary Constituents</b>            |                                                        |                                                    |                                              |                                                |
| Nicotine                               | NA                                                     | NA                                                 | NA                                           | NA                                             |
| Glycerol                               | ↑ 3164%                                                | ↑ 2777% - ↑ 4763%                                  | ↑ 2327%                                      | ↑ 2063% - ↑ 3376%                              |
| Propylene Glycol                       | ↑ 832447%                                              | ↑ 593470% - ↑ 1067676%                             | ↑ 251844%                                    | ↑ 185338% - ↑ 296295%                          |
| Water                                  | ↑ 51%                                                  | ↑ 10.57% - ↑ 99.11%                                | ↓ 33.73%                                     | ↓ 18.53% - ↓ 46.98%                            |
| Menthol*                               | ↑ ≥ 5065342%                                           | ↑ ≥ 4297636% - ↑ ≥ 5991319%                        | 13696514%                                    | ↑ 11720092% - ↑ 16168586%                      |
| Diethylene Glycol                      | NC                                                     | NC                                                 | NC                                           | NC                                             |
| Ethylene Glycol                        | ↓ ≥ 64%                                                | ↓ ≥ 40.53% - ↓ ≥ 87.11%                            | ↓ ≥ 81%                                      | ↓ ≥ 69.09% - ↓ ≥ 91.6%                         |
| <b>Carbonyls &amp; Glycidol</b>        |                                                        |                                                    |                                              |                                                |
| Acetaldehyde                           | ↓ 99.97%                                               | ↓ 99.96% - ↓ 99.98%                                | ↓ 99.97%                                     | ↓ 99.95% - ↓ 99.99%                            |
| Acrolein                               | ↓ 99.84%                                               | ↓ 99.7% - ↓ 99.93%                                 | ↓ 99.74%                                     | ↓ 99.5% - ↓ 99.85%                             |
| Diacetyl                               | ↓ ≥ 99.98%                                             | ↓ ≥ 99.98 - ↓ ≥ 99.99                              | ↓ ≥ 99.97%                                   | ↓ 99.97% - ↓ 99.97%                            |
| Formaldehyde                           | ↓ 97.94%                                               | ↓ 98.56% - ↓ 96.98%                                | ↓ 98.27%                                     | ↓ 98.29% - ↓ 97.8%                             |
| Glycidol                               | ↓ 83.41%                                               | ↓ 76.91% - ↓ 88.75%                                | ↓ 72.41%                                     | ↓ 66.69% - ↓ 79.64%                            |
| Acetyl Propionyl                       | ↓ ≥ 99.98%                                             | ↓ ≥ 99.92% - ↓ ≥ 99.99%                            | ↓ ≥ 99.98%                                   | ↓ ≥ 99.9% - ↓ ≥ 99.99%                         |
| Butyraldehyde                          | ↓ ≥ 99.97%                                             | ↓ ≥ 99.89% - ↓ ≥ 99.99%                            | ↓ ≥ 99.97%                                   | ↓ ≥ 99.91% - ↓ ≥ 99.99%                        |
| Crotonaldehyde                         | ↓ ≥ 99.96%                                             | ↓ ≥ 99.96% - ↓ ≥ 99.96%                            | ↓ ≥ 99.97%                                   | ↓ ≥ 99.96% - ↓ ≥ 99.98%                        |
| Furfural                               | ↓ ≥ 99.97%                                             | ↓ ≥ 99.96% - ↓ ≥ 99.97%                            | ↓ ≥ 99.91%                                   | ↓ ≥ 99.71% - ↓ ≥ 99.95%                        |
| <b>Nicotine Degradants &amp; TSNAs</b> |                                                        |                                                    |                                              |                                                |

|                         |            |                         |            |                         |
|-------------------------|------------|-------------------------|------------|-------------------------|
| <b>β-Nicotyrine</b>     | ↓ 98.29%   | ↓ 97.11% - ↓ 99.26%     | ↓ 94.24%   | ↓ 90.35% - ↓ 97.77%     |
| <b>Cotinine</b>         | ↓ 92.46%   | ↓ 65.35% - ↓ 99.56%     | ↓ 92.05%   | ↓ 64.14% - ↓ 99.14%     |
| <b>Myosmine</b>         | NA         | NA                      | ↓ 92.10%   | ↓ 69.8% - ↓ 98.35%      |
| <b>Nicotine N Oxide</b> | NC         | NC                      | NC         | NC                      |
| <b>Nornicotine</b>      | ↓ 92.41%   | ↓ 90.15% - ↓ 95.22%     | ↓ 93.30%   | ↓ 91.91% - ↓ 95.9%      |
| <b>Anabasine</b>        | ↓ ≥ 99.59% | ↓ ≥ 99.5% - ↓ ≥ 99.66%  | ↓ ≥ 98.34% | ↓ ≥ 94.15% - ↓ ≥ 99.42% |
| <b>Anatabine</b>        | ↓ ≥ 99.8%  | ↓ ≥ 99.45% - ↓ ≥ 99.95% | ↓ ≥ 99.56% | ↓ ≥ 99.9% - ↓ ≥ 98.93%  |
| <b>NNK</b>              | ↓ ≥ 99.55% | ↓ ≥ 99.13% - ↓ ≥ 99.91% | ↓ ≥ 99.56% | ↓ ≥ 99.21% - ↓ ≥ 99.91% |
| <b>NNN</b>              | ↓ ≥ 99.90% | ↓ ≥ 99.70% - ↓ ≥ 99.98% | ↓ ≥ 99.87% | ↓ ≥ 99.6% - ↓ ≥ 99.98%  |
| <b>Metals</b>           |            |                         |            |                         |
| <b>Arsenic</b>          | NA         | NA                      | NA         | NA                      |
| <b>Beryllium</b>        | NA         | NA                      | NA         | NA                      |
| <b>Cadmium</b>          | ↓ ≥ 99.91% | ↓ ≥ 99.9% - ↓ ≥ 99.91%  | ↓ ≥ 99.92% | ↓ ≥ 99.91% - ↓ ≥ 99.93% |
| <b>Chromium</b>         | NC         | NC                      | NC         | NC                      |
| <b>Cobalt</b>           | NA         | NA                      | NA         | NA                      |
| <b>Copper</b>           | ↓ ≥ 88.59% | ↓ ≥ 79.9% - ↓ ≥ 95.36%  | ↓ ≥ 93.65% | ↓ ≥ 93.03% - ↓ ≥ 94.3%  |
| <b>Gold</b>             | NA         | NA                      | NA         | NA                      |
| <b>Iron</b>             | NA         | NA                      | NA         | NA                      |
| <b>Lead</b>             | NC         | NC                      | ↓ ≥ 99.26% | ↓ ≥ 97.68% - ↓ ≥ 99.61% |
| <b>Nickel</b>           | NC         | NC                      | NC         | NC                      |
| <b>Selenium</b>         | NA         | NA                      | NA         | NA                      |
| <b>Silver</b>           | NA         | NA                      | NA         | NA                      |
| <b>Tin</b>              | NA         | NA                      | NA         | NA                      |
| <b>Zinc</b>             | NA         | NA                      | NA         | NA                      |
| <b>Organic Acids</b>    |            |                         |            |                         |
| <b>Benzoic Acid</b>     | NA         | NA                      | NA         | NA                      |
| <b>Propionic Acid</b>   | NA         | NA                      | NA         | NA                      |
| <b>VOCs</b>             |            |                         |            |                         |



|                                                                            |            |                         |            |                         |
|----------------------------------------------------------------------------|------------|-------------------------|------------|-------------------------|
| 1,3-butadiene                                                              | NA         | NA                      | NA         | NA                      |
| Acrylonitrile                                                              | ↓ ≥ 99.99% | ↓ ≥ 99.99% - ↓ ≥ 99.99% | ↓ ≥ 99.99% | ↓ ≥ 99.99% - ↓ ≥ 99.99% |
| Benzene                                                                    | ↓ ≥ 99.98% | ↓ ≥ 99.97% - ↓ ≥ 99.99% | ↓ ≥ 99.98% | ↓ ≥ 99.97% - ↓ ≥ 99.99% |
| Isoprene                                                                   | NA         | NA                      | NA         | NA                      |
| Propylene Oxide                                                            | ↓ ≥ 99.99% | ↓ ≥ 99.99% - ↓ ≥ 99.99% | ↓ ≥ 99.51% | ↓ ≥ 99.45% - ↓ ≥ 99.55% |
| Toluene                                                                    | ↓ ≥ 99.98% | ↓ ≥ 99.98% - ↓ ≥ 99.99% | ↓ ≥ 99.98% | ↓ ≥ 99.98% - ↓ ≥ 99.99% |
| Esters & Alcohols                                                          |            |                         |            |                         |
| 1-Butanol                                                                  | NA         | NA                      | NA         | NA                      |
| Benzyl Acetate                                                             | NA         | NA                      | NA         | NA                      |
| Ethyl Acetate                                                              | NA         | NA                      | NA         | NA                      |
| Ethyl Acetoacetate                                                         | NA         | NA                      | NA         | NA                      |
| Isoamyl Acetate                                                            | NA         | NA                      | NA         | NA                      |
| Isobutyl Acetate                                                           | NA         | NA                      | NA         | NA                      |
| Methyl Acetate                                                             | NA         | NA                      | NA         | NA                      |
| Average Max % Difference                                                   | 218475%    |                         | 480974%    |                         |
| Average Max % Difference without PG, VG, and Water                         | 96.34%     |                         | 96.50%     |                         |
| Non-Intense and Intense Average Max % Difference without PG, VG, and Water | 96.42%     |                         |            |                         |

### 1.14 Statistical Comparison of Non-Intense 1R6F COA Values to Quantifiable Non-Intense JUUL2 Virginia Tobacco Constituents

| Parameter/<br>Constituent | Certified<br>1R6F Value | Certified<br>1R6F<br>Uncertainty | Nicotine<br>Normalized<br>Certified<br>Value | Nicotine<br>Normalized<br>Certified<br>Uncertainty | Maximum<br>T0-T12 VT<br>Mean Value    | SD       | Nicotine<br>Normalized<br>Mean Value | Nicotine<br>Normalized<br>SD | P Value |
|---------------------------|-------------------------|----------------------------------|----------------------------------------------|----------------------------------------------------|---------------------------------------|----------|--------------------------------------|------------------------------|---------|
|                           | 1R6F ISO 3308:2012      |                                  |                                              |                                                    | JUUL2 Virginia Tobacco ISO 20768:2018 |          |                                      |                              |         |
|                           | mg/cigarette            |                                  | mg/mg nicotine                               |                                                    | mg/collection                         |          | mg/mg nicotine                       |                              |         |
| Nicotine                  | 7.21E-01                | 1.03E-01                         | NA                                           | NA                                                 | 1.58E+01                              | 4.30E-01 | NA                                   | NA                           | NA      |
| Acetaldehyde              | 5.22E-01                | 7.10E-02                         | 7.24E-01                                     | 9.85E-02                                           | 4.32E-03                              | 3.60E-04 | 2.74E-04                             | 2.28E-05                     | 0.0001  |
| Acrolein                  | 4.30E-02                | 1.40E-02                         | 5.96E-02                                     | 1.94E-02                                           | 2.81E-03                              | 2.70E-04 | 1.78E-04                             | 1.71E-05                     | 0.0001  |
| Formaldehyde              | 2.70E-02                | 1.00E-02                         | 3.74E-02                                     | 1.39E-02                                           | 1.79E-02                              | 3.30E-04 | 1.13E-03                             | 2.09E-05                     | 0.002   |

### 1.15 Statistical Comparison of Intense 1R6F COA Values to Quantifiable Intense JUUL2 Virginia Tobacco Constituents

| Parameter/<br>Constituent | Certified<br>1R6F Value | Certified<br>1R6F<br>Uncertainty | Nicotine<br>Normalized<br>Certified<br>Value | Nicotine<br>Normalized<br>Certified<br>Uncertainty | Maximum<br>T0-T12 VT<br>Mean Value | SD       | Nicotine<br>Normalized<br>Mean Value | Nicotine<br>Normalized<br>SD | P Value |
|---------------------------|-------------------------|----------------------------------|----------------------------------------------|----------------------------------------------------|------------------------------------|----------|--------------------------------------|------------------------------|---------|
|                           | 1R6F ISO 20778:2018     |                                  |                                              |                                                    | JUUL2 Virginia Tobacco Intense     |          |                                      |                              |         |
|                           | mg/cigarette            |                                  | mg/mg nicotine                               |                                                    | mg/collection                      |          | mg/mg nicotine                       |                              |         |
| Nicotine                  | 1.90E+00                | 1.30E-01                         | NA                                           | NA                                                 | 1.68E+01                           | 2.66E+00 | NA                                   | NA                           | NA      |
| Acetaldehyde              | 1.55E+00                | 2.39E-01                         | 8.19E-01                                     | 1.26E-01                                           | 6.66E-03                           | 5.10E-04 | 3.96E-04                             | 3.03E-05                     | 0.0001  |
| Acrolein                  | 1.54E-01                | 3.30E-02                         | 8.12E-02                                     | 1.74E-02                                           | 6.82E-03                           | 5.80E-04 | 4.05E-04                             | 3.45E-05                     | 0.0001  |
| Formaldehyde              | 1.04E-01                | 3.40E-02                         | 5.49E-02                                     | 1.79E-02                                           | 2.50E-02                           | 1.13E-03 | 1.48E-03                             | 6.72E-05                     | 0.0001  |
