# Supplementary material for: A Practical Framework for Novel Electronic Nicotine Delivery System Evaluation: Chemical and Toxicological Characterization of JUUL2 Aerosol and Comparison with Reference Cigarettes
Source: Toxics. 2024 Jan 4;12(1):41. doi: 10.3390/toxics12010041 (PMC10820849; doi:10.3390/toxics12010041)
Supplement: Supplementary file 1 [file toxics-12-00041-s001.zip]

Archive with 7 entries (7 files):
- Supplementary_Material_File S4_Nicotine Normalized T0-T12 Analytical Stability Resul.pdf
- Supplementary_Material_File S5_Percent Difference to Combustible Cigarettes_Final_Clean.pdf
- Supplementary_Material_File S6_Analysis of Toxicity Studies and Method Details_Final_Clean.pdf
- Supplementary Material Table of Contents_Final.pdf
- Supplementary Material_File S1_Analysis of Chemical Constituents and Method Details__Clean.pdf
- Supplementary_Material_File S2_Per Collection Limit of Detection and Limit of Quanti.pdf
- Supplementary_Material_File S3_Per Collection T0-T12 Analytical Stability Results_Final_Clean.pdf
